# Supplementary material for: Union Exon Based Approach for RNA-Seq Gene Quantification: To Be or Not to Be?
Source: PLoS One. 2015 Nov 11;10(11):e0141910. doi: 10.1371/journal.pone.0141910 (PMC4641603; doi:10.1371/journal.pone.0141910)
Supplement: S1 Table — (XLSX) [file pone.0141910.s001.xlsx]

## Sheet: FeatureCounts.counts
gene_id	symbol	length	HBRR_C4	HBRR_C6	UHRR_C1	UHRR_C2
ENSG00000000003.10	TSPAN6	2968	575	660	2587	2670
ENSG00000000419.8	DPM1	1207	1508	1513	3654	3641
ENSG00000000457.9	SCYL3	6876	835	823	843	841
ENSG00000000460.12	C1orf112	6354	369	350	1957	2009
ENSG00000000938.8	FGR	3474	572	527	188	229
ENSG00000000971.11	CFH	8144	1752	1734	1083	1007
ENSG00000001036.9	FUCA2	3119	1394	1395	7088	7272
ENSG00000001167.10	NFYA	3811	2050	2370	3876	3838
ENSG00000001460.13	STPG1	8514	2275	2164	743	808
ENSG00000001461.12	NIPAL3	9404	17395	17184	2877	2942
ENSG00000001497.12	LAS1L	5589	5716	5489	6465	6874
ENSG00000001561.6	ENPP4	4651	3109	3776	364	352
ENSG00000001629.5	ANKIB1	7130	4392	4746	5508	5329
ENSG00000002330.9	BAD	1708	3548	3227	1446	1698
ENSG00000002549.8	LAP3	3785	3087	3107	4784	4877
ENSG00000002834.13	LASP1	7061	8665	8746	16207	16943
ENSG00000002919.10	SNX11	3606	1734	1768	1426	1468
ENSG00000002933.3	TMEM176A	3479	977	921	6	15
ENSG00000003056.3	M6PR	3777	3463	3391	7534	7760
ENSG00000003137.4	CYP26B1	5015	4100	3837	297	345
ENSG00000003249.9	DBNDD1	3522	5404	5031	2243	2691
ENSG00000003393.10	ALS2	10381	12176	12423	2271	2533
ENSG00000003400.10	CASP10	7598	356	245	1374	1346
ENSG00000003436.10	TFPI	11714	161	147	4701	4710
ENSG00000003509.11	NDUFAF7	3651	985	1113	1380	1571
ENSG00000003987.9	MTMR7	5692	2496	2689	38	41
ENSG00000003989.12	SLC7A2	7905	2118	2469	14912	14657
ENSG00000004142.7	POLDIP2	2662	6814	6547	8524	9290
ENSG00000004399.8	PLXND1	9738	5156	5271	8399	9125
ENSG00000004455.12	AK2	5683	3803	3690	16304	16740
ENSG00000004468.8	CD38	6855	378	340	1999	2191
ENSG00000004478.5	FKBP4	3958	15640	15527	20340	21384
ENSG00000004660.10	CAMKK1	7424	11466	11337	1118	1320
ENSG00000004700.11	RECQL	3778	1128	1156	5024	4634
ENSG00000004766.11	CCDC132	7359	2770	3082	1621	1410
ENSG00000004776.7	HSPB6	1722	1820	1675	2013	2284
ENSG00000004777.14	ARHGAP33	5260	5927	5540	2314	2569
ENSG00000004779.5	NDUFAB1	1600	5185	4965	5802	6120
ENSG00000004799.7	PDK4	4519	3920	4352	2703	2645
ENSG00000004838.9	ZMYND10	4009	209	227	121	172
ENSG00000004846.12	ABCB5	9257	0	5	193	165
ENSG00000004848.6	ARX	2876	620	607	13	6
ENSG00000004961.10	HCCS	2335	1353	1520	2080	2220
ENSG00000004975.7	DVL2	5350	2732	2630	4037	4547
ENSG00000005001.5	PRSS22	2387	77	110	338	402
ENSG00000005007.8	UPF1	8600	11308	11104	11038	11742
ENSG00000005022.5	SLC25A5	1500	10966	11539	27899	28779
ENSG00000005073.5	HOXA11	2307	4	4	518	539
ENSG00000005075.11	POLR2J	962	1371	1301	2477	2617
ENSG00000005102.8	MEOX1	2707	0	3	112	104
ENSG00000005156.7	LIG3	8240	1687	1757	3372	3773
ENSG00000005175.5	RPAP3	3343	1282	1295	2442	2381
ENSG00000005189.15	AC004381.6	4111	359	275	1442	1199
ENSG00000005194.10	CIAPIN1	3509	3208	2973	4272	4355
ENSG00000005238.15	FAM214B	6409	2928	2871	1042	1177
ENSG00000005249.8	PRKAR2B	4318	3674	4205	1402	1330
ENSG00000005302.13	MSL3	6494	2488	2389	2072	2135
ENSG00000005339.8	CREBBP	15068	8492	8107	6773	7062
ENSG00000005379.11	BZRAP1	11382	12453	12543	790	893
ENSG00000005381.6	MPO	3622	118	139	2	10
ENSG00000005436.9	GCFC2	5465	611	611	1500	1509
ENSG00000005448.12	WDR54	2860	1157	1057	2279	2448
ENSG00000005469.7	CROT	4979	624	696	1104	968
ENSG00000005471.11	ABCB4	7494	20	19	177	205
ENSG00000005483.15	KMT2E	9227	7577	7729	7296	7185
ENSG00000005486.12	RHBDD2	2441	14863	14087	3530	3970
ENSG00000005513.9	SOX8	4432	5764	5663	396	390
ENSG00000005812.6	FBXL3	4651	3274	3807	1749	1707
ENSG00000005882.7	PDK2	5481	10298	10139	1679	1697
ENSG00000005884.13	ITGA3	9802	3364	3058	13282	14729
ENSG00000005889.11	ZFX	9037	1450	1516	2342	2203
ENSG00000005893.11	LAMP2	5617	13181	14849	9033	8887
ENSG00000005955.8	GGNBP2	9729	5824	5981	5252	5389
ENSG00000005961.13	ITGA2B	5551	506	469	332	355
ENSG00000005981.8	ASB4	4605	112	121	58	77
ENSG00000006007.7	GDE1	4412	7741	7532	5011	5254
ENSG00000006015.13	C19orf60	3370	3372	3122	1610	1956
ENSG00000006016.6	CRLF1	3018	1197	1151	2716	3048
ENSG00000006025.7	OSBPL7	6572	2089	2033	2320	2600
ENSG00000006042.7	TMEM98	5187	3037	2984	1618	1711
ENSG00000006047.8	YBX2	4618	163	150	816	959
ENSG00000006062.9	MAP3K14	5132	1259	1326	1469	1631
ENSG00000006114.11	SYNRG	14277	3644	3727	3496	3350
ENSG00000006116.3	CACNG3	3088	4560	4365	2	5
ENSG00000006118.10	TMEM132A	7271	11550	10899	4533	5197
ENSG00000006128.7	TAC1	1888	670	775	24	3
ENSG00000006194.6	ZNF263	9329	2936	2689	3482	3512
ENSG00000006210.6	CX3CL1	5983	7771	7737	1045	1226
ENSG00000006283.13	CACNA1G	9709	6063	5967	57	76
ENSG00000006327.9	TNFRSF12A	1848	216	246	5118	5577
ENSG00000006377.9	DLX6	3449	129	128	153	154
ENSG00000006432.11	MAP3K9	12386	7941	8239	1320	1387
ENSG00000006451.3	RALA	3665	2912	3180	3966	3968
ENSG00000006468.9	ETV1	9686	12859	14830	1844	1881
ENSG00000006530.11	AGK	6547	3091	2946	3069	3383
ENSG00000006534.11	ALDH3B1	6621	213	222	2763	2979
ENSG00000006611.11	USH1C	4187	727	834	164	204
ENSG00000006634.3	DBF4	4583	305	267	2828	2850
ENSG00000006638.7	TBXA2R	2793	60	57	153	192
ENSG00000006712.10	PAF1	2668	4735	4551	3986	4093
ENSG00000006715.11	VPS41	7801	6587	7062	3987	3577
ENSG00000006740.12	ARHGAP44	9281	8684	8215	465	460
ENSG00000006744.14	ELAC2	6345	3739	3654	7523	8141
ENSG00000006747.10	SCIN	5048	358	393	49	62
ENSG00000006756.11	ARSD	7030	659	654	1566	1711
ENSG00000006757.7	PNPLA4	3441	960	773	735	766
ENSG00000006831.9	ADIPOR2	5878	10677	10960	9597	9697
ENSG00000007038.6	PRSS21	1984	10	11	3061	3322
ENSG00000007080.6	CCDC124	1660	3893	3593	3969	4370
ENSG00000007174.13	DNAH9	16980	589	629	55	59
ENSG00000007202.10	KIAA0100	9235	11488	11193	17161	17293
ENSG00000007237.14	GAS7	10100	59565	61281	4404	4688
ENSG00000007255.6	TRAPPC6A	933	718	477	1051	1185
ENSG00000007264.9	MATK	4138	2614	2653	1189	1446
ENSG00000007341.14	ST7L	8111	932	908	1109	1069
ENSG00000007376.3	RPUSD1	2769	1495	1398	2299	2712
ENSG00000007384.11	RHBDF1	5104	985	863	2439	2895
ENSG00000007392.12	LUC7L	6176	4736	4946	4399	4938
ENSG00000007402.7	CACNA2D2	6319	4079	4039	580	718
ENSG00000007516.9	BAIAP3	6143	7580	7306	924	1072
ENSG00000007520.3	TSR3	1243	2451	2554	2050	2718
ENSG00000007866.14	TEAD3	3046	328	301	1741	1975
ENSG00000007923.11	DNAJC11	5147	4249	4153	6032	6490
ENSG00000007968.6	E2F2	5457	7	7	2385	2557
ENSG00000008018.8	PSMB1	2256	4756	4650	10327	10635
ENSG00000008056.8	SYN1	3203	38867	37878	178	157
ENSG00000008118.5	CAMK1G	2676	4235	4068	86	92
ENSG00000008130.11	NADK	5637	2422	2233	5622	6027
ENSG00000008196.8	TFAP2B	6149	455	475	114	127
ENSG00000008277.10	ADAM22	12217	14817	17182	1101	994
ENSG00000008282.3	SYPL1	2794	2664	3010	5408	5185
ENSG00000008283.11	CYB561	5320	3557	3134	5070	5351
ENSG00000008311.10	AASS	4591	809	931	1319	1285
ENSG00000008323.11	PLEKHG6	4260	0	0	334	378
ENSG00000008324.6	SS18L2	1301	1094	1282	1045	1070
ENSG00000008382.11	MPND	2049	1379	1361	1086	1110
ENSG00000008405.7	CRY1	5062	2606	2656	2426	2357
ENSG00000008441.12	NFIX	6302	25014	24748	5488	5991
ENSG00000008513.10	ST3GAL1	8730	2000	1924	4740	5115
ENSG00000008516.12	MMP25	4126	42	57	208	222
ENSG00000008735.10	MAPK8IP2	6107	26338	25162	400	495
ENSG00000008853.12	RHOBTB2	6580	7855	7916	2106	2455
ENSG00000008869.7	HEATR5B	8206	4150	4472	2516	2655
ENSG00000008952.12	SEC62	7928	11475	13381	5592	5557
ENSG00000009307.11	CSDE1	5755	29334	30376	54429	53468
ENSG00000009709.7	PAX7	6313	280	286	3	3
ENSG00000009724.12	MASP2	4251	5	2	135	157
ENSG00000009790.10	TRAF3IP3	7753	79	78	649	672
ENSG00000009830.7	POMT2	10012	2546	2607	2019	2213
ENSG00000009844.11	VTA1	7194	3254	3684	3364	3414
ENSG00000009950.11	MLXIPL	4815	3728	3459	2159	2206
ENSG00000009954.6	BAZ1B	7053	7437	7714	15305	15201
ENSG00000010017.9	RANBP9	3480	5661	6013	5311	5077
ENSG00000010072.11	SPRTN	5906	449	389	918	826
ENSG00000010256.6	UQCRC1	3236	11416	10734	11137	11991
ENSG00000010270.9	STARD3NL	4348	2824	2830	2313	2337
ENSG00000010278.7	CD9	3218	6731	6664	7419	7813
ENSG00000010295.15	IFFO1	5193	4030	3619	2002	2257
ENSG00000010318.15	PHF7	3367	558	470	676	788
ENSG00000010319.2	SEMA3G	5011	2830	2618	696	664
ENSG00000010322.11	NISCH	9161	30236	29512	6683	7297
ENSG00000010327.6	STAB1	10588	1872	1668	75	52
ENSG00000010361.9	FUZ	2951	1986	1756	996	1121
ENSG00000010539.7	ZNF200	7498	564	557	1242	1199
ENSG00000010610.5	CD4	4583	953	868	722	755
ENSG00000010671.11	BTK	4227	149	197	1504	1426
ENSG00000010704.14	HFE	5675	173	119	809	743
ENSG00000010803.12	SCMH1	4447	2213	2216	3080	3373
ENSG00000010810.13	FYN	7411	10876	10923	3727	3937
ENSG00000010818.4	HIVEP2	9774	11545	11578	2708	2703
ENSG00000011007.8	TCEB3	5391	2920	2873	5451	5378
ENSG00000011009.6	LYPLA2	2196	2027	1855	3747	4320
ENSG00000011083.4	SLC6A7	4391	6528	6077	29	18
ENSG00000011114.10	BTBD7	11333	1278	1395	2285	2388
ENSG00000011143.12	MKS1	4073	892	800	1910	2196
ENSG00000011198.3	ABHD5	3172	696	707	1188	1264
ENSG00000011201.6	KAL1	7131	1197	1204	396	344
ENSG00000011243.13	AKAP8L	5081	10243	9296	6237	7104
ENSG00000011260.9	UTP18	2721	2306	2425	4737	4898
ENSG00000011332.15	DPF1	4800	2559	2269	324	333
ENSG00000011376.5	LARS2	5393	2440	2372	3813	3889
ENSG00000011426.6	ANLN	6012	10303	10880	12049	12040
ENSG00000011451.13	WIZ	8155	4600	4051	5793	6328
ENSG00000011465.12	DCN	8083	3480	3536	4155	4401
ENSG00000011478.7	QPCTL	2396	702	739	1550	1588
ENSG00000011485.10	PPP5C	7059	6187	5958	5761	6214
ENSG00000011523.9	CEP68	8623	4430	4886	1747	1662
ENSG00000011600.7	TYROBP	907	725	585	25	46
ENSG00000011638.6	TMEM159	2558	983	1046	963	888
ENSG00000012048.15	BRCA1	8278	306	422	5435	5413
ENSG00000012061.11	ERCC1	5576	4325	4150	3573	4179
ENSG00000012171.13	SEMA3B	5767	8433	7882	6286	7152
ENSG00000012211.8	PRICKLE3	3396	171	133	1198	1300
ENSG00000012223.8	LTF	4247	151	216	1448	1291
ENSG00000012232.4	EXTL3	13220	6777	6987	3825	3992
ENSG00000012504.9	NR1H4	3460	2	1	366	274
ENSG00000012779.6	ALOX5	3685	1971	1857	123	180
ENSG00000012817.11	KDM5D	9463	4393	4444	1532	1512
ENSG00000012822.11	CALCOCO1	6296	13820	13641	3611	4097
ENSG00000013016.10	EHD3	4959	11994	11393	742	840
ENSG00000013275.3	PSMC4	2387	4866	4934	6954	7743
ENSG00000013288.4	MAN2B2	8898	3981	3778	3541	3740
ENSG00000013293.5	SLC7A14	10459	5716	6018	114	79
ENSG00000013306.11	SLC25A39	3526	3932	3859	13117	14872
ENSG00000013374.11	NUB1	5411	4128	4182	5252	5185
ENSG00000013375.11	PGM3	7331	2218	2588	4179	4073
ENSG00000013392.6	RWDD2A	4686	1601	1596	562	504
ENSG00000013503.5	POLR3B	4858	905	1009	1452	1423
ENSG00000013523.5	ANGEL1	5347	3248	3122	2693	2918
ENSG00000013561.13	RNF14	4834	3888	4045	2162	2157
ENSG00000013563.9	DNASE1L1	4130	1188	1243	2061	2145
ENSG00000013573.12	DDX11	8374	1149	1152	7403	8194
ENSG00000013583.4	HEBP1	3442	2165	2000	2008	2210
ENSG00000013619.9	MAMLD1	5958	1778	1905	1373	1296
ENSG00000013725.10	CD6	5995	167	121	814	660
ENSG00000014123.9	UFL1	4539	2160	2373	3012	2903
ENSG00000014138.4	POLA2	5726	802	834	4067	4431
ENSG00000014164.6	ZC3H3	3731	1733	1606	2262	2562
ENSG00000014216.11	CAPN1	7553	7552	7305	9497	10507
ENSG00000014641.13	MDH1	4993	34763	34755	10597	10771
ENSG00000014914.15	MTMR11	4591	799	854	1157	1139
ENSG00000014919.8	COX15	4177	2162	2252	3721	3567
ENSG00000015133.14	CCDC88C	12426	528	457	2888	3073
ENSG00000015153.10	YAF2	10840	1398	1612	666	578
ENSG00000015171.14	ZMYND11	5300	9522	10672	3535	3360
ENSG00000015285.6	WAS	2381	386	348	1325	1546
ENSG00000015413.5	DPEP1	2712	4	6	112	144
ENSG00000015520.10	NPC1L1	5252	65	86	380	419
ENSG00000015532.5	XYLT2	5472	1767	1705	2994	3229
ENSG00000015592.12	STMN4	3294	15559	15884	13	6
ENSG00000015676.13	NUDCD3	10113	18480	18099	7063	7650
ENSG00000016391.6	CHDH	7758	2525	2608	1844	1911
ENSG00000016402.8	IL20RA	4673	584	501	46	38
ENSG00000016602.8	CLCA4	3649	394	474	1	2
ENSG00000016864.12	GLT8D1	3783	2615	2400	4391	4378
ENSG00000017260.15	ATP2C1	8533	8768	9934	6455	6188
ENSG00000017373.11	SRCIN1	11025	14976	14549	491	591
ENSG00000017427.11	IGF1	8087	197	183	149	101
ENSG00000017483.10	SLC38A5	4016	1296	1157	4004	4446
ENSG00000017621.11	MAGIX	4948	666	658	74	110
ENSG00000018189.8	RUFY3	8070	15217	16508	2106	2057
ENSG00000018280.12	SLC11A1	8676	1059	956	48	58
ENSG00000018510.8	AGPS	8197	2211	2415	5093	5145
ENSG00000018610.9	CXorf56	2606	1249	1431	1413	1589
ENSG00000018625.10	ATP1A2	6298	63579	63261	630	639
ENSG00000019169.9	MARCO	2079	106	112	6	5
ENSG00000019186.5	CYP24A1	3972	18	39	1158	1187
ENSG00000019485.8	PRDM11	5527	881	874	459	408
ENSG00000019505.3	SYT13	5424	11953	12212	335	288
ENSG00000019549.4	SNAI2	2282	192	217	1075	1037
ENSG00000019582.10	CD74	3184	15351	14673	5857	6336
ENSG00000019991.11	HGF	8897	309	361	1833	1710
ENSG00000020129.11	NCDN	4917	61568	57524	3472	3789
ENSG00000020181.13	GPR124	7061	1527	1518	3074	3423
ENSG00000020577.9	SAMD4A	12170	4750	5141	1864	1869
ENSG00000020633.14	RUNX3	4605	95	72	1706	1871
ENSG00000021300.9	PLEKHB1	4933	47291	45358	683	737
ENSG00000021355.8	SERPINB1	3226	1132	1222	3643	3631
ENSG00000021574.7	SPAST	5213	1721	2229	1428	1408
ENSG00000021762.15	OSBPL5	7466	1791	1712	1483	1585
ENSG00000021776.6	AQR	9779	2000	1984	4460	4615
ENSG00000021826.10	CPS1	10444	351	474	31072	30592
ENSG00000021852.8	C8B	2729	0	0	166	176
ENSG00000022267.12	FHL1	4945	15226	15660	4585	4546
ENSG00000022355.10	GABRA1	5494	13562	16340	7	15
ENSG00000022840.11	RNF10	5911	12330	11872	10319	10969
ENSG00000023041.7	ZDHHC6	2404	1823	1676	3059	3231
ENSG00000023171.10	GRAMD1B	9770	22028	22086	4929	4976
ENSG00000023191.12	RNH1	7367	7011	6502	7479	8765
ENSG00000023287.8	RB1CC1	7615	7999	9478	4682	4275
ENSG00000023330.10	ALAS1	2536	5541	5458	3268	3540
ENSG00000023445.9	BIRC3	7484	341	328	1458	1467
ENSG00000023516.7	AKAP11	9913	11961	13683	3669	3619
ENSG00000023572.4	GLRX2	1299	522	547	533	562
ENSG00000023697.8	DERA	2848	883	832	2680	2846
ENSG00000023734.6	STRAP	2211	8500	9172	12683	12682
ENSG00000023839.6	ABCC2	6232	56	49	7198	7023
ENSG00000023892.9	DEF6	2675	239	237	2301	2757
ENSG00000023902.9	PLEKHO1	6629	4276	4024	1989	2316
ENSG00000023909.5	GCLM	5374	1137	1299	1796	1806
ENSG00000024526.12	DEPDC1	5904	25	16	2185	2109
ENSG00000024862.12	CCDC28A	1496	1795	1857	767	828
ENSG00000025039.10	RRAGD	5072	3540	3989	1284	1361
ENSG00000025156.8	HSF2	2702	1803	2030	1807	1816
ENSG00000025423.7	HSD17B6	2272	693	679	113	122
ENSG00000025434.14	NR1H3	4346	567	589	918	1019
ENSG00000025770.14	NCAPH2	3159	3814	3543	4304	4659
ENSG00000025772.7	TOMM34	2062	3596	3171	5241	5589
ENSG00000025796.9	SEC63	8587	4390	5332	7782	7425
ENSG00000026025.9	VIM	4965	14371	14866	107316	114970
ENSG00000026103.15	FAS	3562	466	461	611	544
ENSG00000026559.9	KCNG1	6320	652	666	730	750
ENSG00000026652.9	AGPAT4	9419	6568	6638	1187	1234
ENSG00000026751.12	SLAMF7	4604	5	13	243	224
ENSG00000026950.12	BTN3A1	5547	1511	1470	2984	3231
ENSG00000027697.8	IFNGR1	2680	3419	3700	2357	2460
ENSG00000027847.9	B4GALT7	4927	1201	1146	1421	1625
ENSG00000027869.7	SH2D2A	2512	44	62	366	377
ENSG00000028116.12	VRK2	3557	473	485	1149	1050
ENSG00000028528.10	SNX1	9796	7403	7664	8295	8758
ENSG00000028839.5	TBPL1	5039	1940	2177	1197	1269
ENSG00000029153.10	ARNTL2	5002	505	557	1806	1676
ENSG00000029363.11	BCLAF1	9297	9830	11380	13374	12280
ENSG00000029364.7	SLC39A9	7136	3598	3973	5782	5909
ENSG00000029639.6	TFB1M	2736	615	531	1364	1332
ENSG00000029725.12	RABEP1	6555	8705	9998	5250	5109
ENSG00000029993.10	HMGB3	3967	1049	906	4815	4861
ENSG00000030110.8	BAK1	2267	746	823	2043	2161
ENSG00000030582.12	GRN	3520	3631	3130	18363	20746
ENSG00000031691.6	CENPQ	1733	285	373	930	952
ENSG00000031698.8	SARS	3836	14373	14110	11595	12374
ENSG00000031823.10	RANBP3	7445	4856	4672	4399	5063
ENSG00000032219.14	ARID4A	7568	2359	2593	1638	1641
ENSG00000033050.3	ABCF2	4448	4923	4965	7857	7974
ENSG00000033178.8	UBA6	11432	2473	3030	3868	3874
ENSG00000033327.8	GAB2	6771	6362	6094	2181	2257
ENSG00000033800.9	PIAS1	4524	2224	2329	2354	2273
ENSG00000034053.10	APBA2	6869	17894	17632	1108	1244
ENSG00000034152.14	MAP2K3	3783	1542	1463	3112	3459
ENSG00000034239.6	EFCAB1	5805	190	217	0	0
ENSG00000034533.7	ASTE1	3427	475	477	514	537
ENSG00000034677.7	RNF19A	6031	3794	4409	3639	3866
ENSG00000034713.3	GABARAPL2	3034	14092	14390	4468	4518
ENSG00000035115.17	SH3YL1	11165	2403	2570	1440	1482
ENSG00000035141.3	FAM136A	3086	1547	1597	5717	5562
ENSG00000035499.8	DEPDC1B	3806	76	88	2319	2377
ENSG00000035664.7	DAPK2	7041	815	820	289	378
ENSG00000036054.8	TBC1D23	5168	1752	2062	2457	2314
ENSG00000036448.5	MYOM2	7062	1637	1695	93	81
ENSG00000036530.4	CYP46A1	9354	6006	5307	188	210
ENSG00000036549.8	ZZZ3	9008	2207	2322	4017	3773
ENSG00000036672.11	USP2	4538	2909	3078	361	400
ENSG00000037042.8	TUBG2	2772	8968	8787	2279	2461
ENSG00000037241.3	RPL26L1	1164	715	683	1517	1652
ENSG00000037280.11	FLT4	8849	272	285	138	147
ENSG00000037474.10	NSUN2	5506	2698	2710	11290	11448
ENSG00000037637.6	FBXO42	8984	3139	3179	2626	2718
ENSG00000038002.4	AGA	2675	587	612	915	953
ENSG00000038219.8	BOD1L1	15860	6680	7044	6421	6189
ENSG00000038274.12	MAT2B	5153	4519	4924	3103	3269
ENSG00000038295.3	TLL1	7522	1012	866	14	16
ENSG00000038382.13	TRIO	17500	13693	13353	11138	11833
ENSG00000038427.11	VCAN	14831	3770	4002	9902	9539
ENSG00000038945.10	MSR1	7812	309	322	99	79
ENSG00000039123.11	SKIV2L2	6578	3479	3703	6846	6452
ENSG00000039139.9	DNAH5	16475	172	161	211	245
ENSG00000039319.12	ZFYVE16	11461	4014	4486	3396	3169
ENSG00000039523.13	FAM65A	6730	8735	8300	4496	5054
ENSG00000039560.9	RAI14	7702	890	936	5106	5121
ENSG00000039650.5	PNKP	3531	1591	1502	2574	2920
ENSG00000040275.12	SPDL1	4777	604	677	3162	3168
ENSG00000040487.8	PQLC2	2686	1207	1076	1228	1270
ENSG00000040531.10	CTNS	3398	636	680	1558	1615
ENSG00000040633.8	PHF23	2783	2233	2048	2717	2823
ENSG00000040933.11	INPP4A	13202	8970	9705	4148	4262
ENSG00000041357.11	PSMA4	3839	3826	3839	11004	10570
ENSG00000041515.11	MYO16	8994	843	691	363	450
ENSG00000041880.10	PARP3	2928	1309	1159	1680	1755
ENSG00000041982.10	TNC	8687	1358	1401	48266	50509
ENSG00000041988.11	THAP3	4072	1414	1453	979	939
ENSG00000042088.9	TDP1	6221	1037	1010	2311	2323
ENSG00000042286.10	AIFM2	5131	819	811	1617	1826
ENSG00000042317.12	SPATA7	6872	1145	1146	592	498
ENSG00000042445.9	RETSAT	4264	3776	3790	4327	4249
ENSG00000042493.11	CAPG	2607	842	933	3269	3654
ENSG00000042753.7	AP2S1	1704	4778	4293	4929	5326
ENSG00000042980.8	ADAM28	9351	392	409	90	59
ENSG00000043039.5	BARX2	4411	61	80	236	293
ENSG00000043143.16	PHF15	9873	6585	6579	3665	3916
ENSG00000043355.6	ZIC2	3301	8586	9229	1665	1730
ENSG00000043462.7	LCP2	7231	506	532	1629	1782
ENSG00000043591.4	ADRB1	2862	523	563	39	48
ENSG00000044090.4	CUL7	5628	3382	3053	5933	6245
ENSG00000044459.10	CNTLN	11167	419	521	1048	964
ENSG00000044524.6	EPHA3	6674	396	409	437	548
ENSG00000044574.7	HSPA5	3908	20449	20708	74481	75292
ENSG00000046604.8	DSG2	6190	100	63	6189	6230
ENSG00000046647.9	GEMIN8	2424	1112	998	1211	1147
ENSG00000046651.10	OFD1	5212	1625	1595	3475	3416
ENSG00000046653.10	GPM6B	5675	47306	54968	926	919
ENSG00000046774.9	MAGEC2	1991	1	0	1105	1064
ENSG00000047056.10	WDR37	5656	3773	3873	1678	1615
ENSG00000047188.11	YTHDC2	10816	2971	3286	3630	3558
ENSG00000047249.12	ATP6V1H	5090	10397	10097	2960	2947
ENSG00000047457.9	CP	7296	2065	2026	9464	9194
ENSG00000047579.15	DTNBP1	3078	1905	1891	1178	1210
ENSG00000047617.10	ANO2	6012	131	125	124	131
ENSG00000047621.7	C12orf4	4939	1514	1727	1186	1219
ENSG00000047634.10	SCML1	5475	723	800	1522	1496
ENSG00000047662.4	FAM184B	6622	507	501	22	34
ENSG00000048140.13	TSPAN17	5218	2675	2592	2166	2412
ENSG00000048162.15	NOP16	2852	666	596	2890	3057
ENSG00000048342.11	CC2D2A	7570	607	721	1179	1098
ENSG00000048392.7	RRM2B	5548	2422	2942	2236	2078
ENSG00000048405.5	ZNF800	5793	806	876	1635	1589
ENSG00000048462.6	TNFRSF17	1118	0	4	243	248
ENSG00000048540.10	LMO3	10268	7087	8600	60	62
ENSG00000048544.5	MRPS10	2110	1771	1804	3362	3576
ENSG00000048828.12	FAM120A	7296	5246	5672	11359	12120
ENSG00000049089.9	COL9A2	4151	5629	5573	1276	1440
ENSG00000049130.9	KITLG	6030	1369	1752	801	797
ENSG00000049239.8	H6PD	9321	2508	2407	4910	5006
ENSG00000049246.10	PER3	8059	6583	7224	2435	2321
ENSG00000049247.9	UTS2	1783	0	15	1378	1363
ENSG00000049540.12	ELN	6542	2626	2514	495	602
ENSG00000049541.6	RFC2	2197	1148	1225	4181	4695
ENSG00000049656.9	CLPTM1L	6557	3807	3711	12495	13496
ENSG00000049860.9	HEXB	5067	2323	2576	9739	9660
ENSG00000049883.10	PTCD2	3637	475	597	845	921
ENSG00000050030.9	KIAA2022	11719	1410	1411	158	156
ENSG00000050130.13	JKAMP	4350	2823	2797	2059	2208
ENSG00000050165.13	DKK3	5059	53053	50761	5797	6223
ENSG00000050327.10	ARHGEF5	5818	40	54	376	331
ENSG00000050344.8	NFE2L3	4249	126	123	3056	3117
ENSG00000050393.7	MCUR1	6057	3353	3333	3675	3439
ENSG00000050426.11	LETMD1	4400	4920	4818	5690	5869
ENSG00000050438.12	SLC4A8	11415	2726	2956	432	497
ENSG00000050555.13	LAMC3	7594	428	409	672	657
ENSG00000050748.13	MAPK9	8955	14956	15912	3425	3272
ENSG00000050820.12	BCAR1	8335	7720	7084	4361	4771
ENSG00000051009.6	FAM160A2	4736	2843	2501	2371	2583
ENSG00000051180.12	RAD51	2863	28	30	1833	2031
ENSG00000051341.9	POLQ	9099	19	30	2471	2253
ENSG00000051382.4	PIK3CB	6531	5417	5704	3620	3490
ENSG00000051523.6	CYBA	3357	830	693	7597	9156
ENSG00000051620.6	HEBP2	10356	2010	2266	2658	2599
ENSG00000051825.10	MPHOSPH9	10304	1306	1400	2987	3136
ENSG00000052344.11	PRSS8	3008	72	83	1649	1824
ENSG00000052723.7	SIKE1	5894	1714	1923	3911	3879
ENSG00000052795.8	FNIP2	10868	3245	3890	1916	1828
ENSG00000052802.8	MSMO1	2892	4385	5466	3642	3597
ENSG00000052850.5	ALX4	5750	60	47	189	221
ENSG00000053372.4	MRTO4	2822	2101	2041	5073	5652
ENSG00000053438.7	NNAT	1294	5061	4648	20	12
ENSG00000053501.8	USE1	2431	1553	1389	924	1115
ENSG00000053702.10	NRIP2	2803	3629	3485	4	3
ENSG00000053747.11	LAMA3	13522	507	547	741	816
ENSG00000053770.7	AP5M1	4371	2060	2310	1629	1718
ENSG00000053900.6	ANAPC4	7494	1752	1645	2269	2129
ENSG00000054116.7	TRAPPC3	3313	3328	3312	3667	3992
ENSG00000054118.9	THRAP3	4736	7830	8261	13346	13747
ENSG00000054179.7	ENTPD2	2633	646	552	482	524
ENSG00000054392.8	HHAT	4296	346	322	326	316
ENSG00000054598.5	FOXC1	3447	593	664	975	1071
ENSG00000054654.11	SYNE2	31405	4307	4078	7662	7764
ENSG00000054690.9	PLEKHH1	10817	18149	17743	2116	2259
ENSG00000054793.9	ATP9A	8317	30815	31481	5801	5841
ENSG00000054803.3	CBLN4	3024	1289	1448	6	1
ENSG00000054965.6	FAM168A	7823	22740	23118	6223	5985
ENSG00000054967.8	RELT	6322	1389	1468	1779	2200
ENSG00000055070.12	SZRD1	4747	3785	3654	10602	11364
ENSG00000055118.10	KCNH2	7017	4671	4270	2083	2428
ENSG00000055130.11	CUL1	3548	6216	6281	6984	6975
ENSG00000055147.13	FAM114A2	6543	745	712	1287	1278
ENSG00000055163.14	CYFIP2	10509	34681	34413	6248	6572
ENSG00000055211.8	GINM1	2248	1975	2055	2053	1945
ENSG00000055332.12	EIF2AK2	10753	3551	4400	4222	4062
ENSG00000055483.15	USP36	10409	4343	4323	6407	6963
ENSG00000055609.13	KMT2C	22650	8230	8386	7483	7445
ENSG00000055732.8	MCOLN3	6623	25	18	307	311
ENSG00000055917.11	PUM2	6858	8958	9548	8464	8576
ENSG00000055957.6	ITIH1	4543	15	13	184	160
ENSG00000056050.6	C4orf27	1436	1485	1748	1235	1199
ENSG00000056277.11	ZNF280C	4634	196	246	573	648
ENSG00000056558.6	TRAF1	6449	1447	1448	1077	1086
ENSG00000056661.9	PCGF2	3511	2835	2812	3420	3578
ENSG00000056736.5	IL17RB	3038	1995	1770	1292	1224
ENSG00000056972.14	TRAF3IP2	6553	610	727	1772	1703
ENSG00000056998.14	GYG2	3646	1092	1002	1846	1956
ENSG00000057149.10	SERPINB3	1777	0	0	129	98
ENSG00000057252.8	SOAT1	7033	921	944	4462	4485
ENSG00000057294.9	PKP2	6069	401	421	1630	1691
ENSG00000057593.9	F7	3792	105	150	307	389
ENSG00000057608.12	GDI2	4033	9863	10347	17534	16826
ENSG00000057704.6	TMCC3	6515	2448	2616	241	254
ENSG00000057757.5	PITHD1	2186	9995	10167	3278	3454
ENSG00000058056.4	USP13	8440	1549	1637	3527	3696
ENSG00000058063.11	ATP11B	9196	2512	2581	4041	3770
ENSG00000058085.10	LAMC2	6543	573	581	234	221
ENSG00000058262.5	SEC61A1	4697	6901	6937	26047	27742
ENSG00000058335.11	RASGRF1	8683	18003	17572	191	244
ENSG00000058404.15	CAMK2B	8159	36840	36350	172	184
ENSG00000058600.11	POLR3E	9454	2576	2517	5168	5640
ENSG00000058799.9	YIPF1	2259	1661	1595	1330	1474
ENSG00000059122.12	FLYWCH1	8413	8117	8114	3651	4171
ENSG00000059377.11	TBXAS1	6271	371	407	360	433
ENSG00000059378.8	PARP12	6285	383	363	2049	2285
ENSG00000059573.4	ALDH18A1	3756	2109	2227	8657	9108
ENSG00000059588.5	TARBP1	7743	4735	4617	6312	6353
ENSG00000059691.7	PET112	11757	3338	3358	1560	1688
ENSG00000059804.11	SLC2A3	6159	7169	6931	18139	18667
ENSG00000059915.12	PSD	6327	18609	17582	283	336
ENSG00000060069.12	CTDP1	5296	1328	1244	1671	1934
ENSG00000060138.8	YBX3	8615	2744	2828	14366	16107
ENSG00000060140.4	STYK1	3424	535	578	85	110
ENSG00000060491.12	OGFR	4702	4317	4201	5218	6146
ENSG00000060558.3	GNA15	2613	421	344	934	1048
ENSG00000060566.9	CREB3L3	2678	59	53	138	162
ENSG00000060642.6	PIGV	3382	837	807	1339	1484
ENSG00000060656.15	PTPRU	6700	3337	2991	3536	3946
ENSG00000060749.10	QSER1	10537	1877	2098	5309	5271
ENSG00000060762.14	MPC1	1525	4291	4239	1731	1772
ENSG00000060982.10	BCAT1	10372	1830	2240	7932	7605
ENSG00000061273.13	HDAC7	9936	3266	2879	6569	7574
ENSG00000061337.11	LZTS1	5706	3225	3079	1743	1938
ENSG00000061455.10	PRDM6	9350	101	138	52	58
ENSG00000061656.5	SPAG4	2240	181	206	1233	1247
ENSG00000061918.8	GUCY1B3	3724	8787	9103	173	152
ENSG00000061936.5	SFSWAP	10157	4683	4398	4635	4777
ENSG00000061938.12	TNK2	11297	17721	17038	3938	4627
ENSG00000061987.10	MON2	13121	4100	4786	3555	3610
ENSG00000062096.10	ARSF	2215	103	117	0	0
ENSG00000062194.11	GPBP1	6493	8142	9331	6262	6025
ENSG00000062524.11	LTK	3490	210	295	219	231
ENSG00000062650.13	WAPAL	7280	2657	3074	5173	5088
ENSG00000062725.5	APPBP2	9866	5019	5633	6184	6378
ENSG00000063015.15	SEZ6	5103	6954	6806	18	19
ENSG00000063176.11	SPHK2	6008	3562	3448	1181	1334
ENSG00000063180.4	CA11	2075	25683	23671	775	709
ENSG00000063241.3	ISOC2	4408	1883	1749	2074	2376
ENSG00000063322.9	MED29	3835	7487	7073	3696	3703
ENSG00000063601.12	MTMR1	6332	3048	3297	2763	2902
ENSG00000063761.11	ADCK1	5317	1014	867	670	736
ENSG00000063854.8	HAGH	5052	7326	6864	2448	2810
ENSG00000064012.17	CASP8	6808	79	66	2069	2112
ENSG00000064102.10	ASUN	3345	1015	1041	4563	4440
ENSG00000064195.7	DLX3	2715	1	1	282	277
ENSG00000064199.2	SPA17	5205	426	377	615	516
ENSG00000064205.6	WISP2	4981	86	56	3553	3899
ENSG00000064270.8	ATP2C2	6693	235	236	322	291
ENSG00000064300.4	NGFR	4150	1756	1842	515	574
ENSG00000064309.10	CDON	10600	2689	2838	1868	1872
ENSG00000064313.7	TAF2	6547	1607	1677	3795	3563
ENSG00000064393.11	HIPK2	15220	26278	28002	7188	7217
ENSG00000064419.9	TNPO3	3933	3582	3668	7327	7597
ENSG00000064490.9	RFXANK	2533	1286	1118	2625	2957
ENSG00000064545.10	TMEM161A	3281	1052	999	2306	2732
ENSG00000064547.9	LPAR2	2980	207	188	1069	1213
ENSG00000064601.12	CTSA	5856	7397	6714	11615	12435
ENSG00000064607.12	SUGP2	7744	17358	17377	13524	13845
ENSG00000064652.6	SNX24	3550	1055	1076	818	827
ENSG00000064666.10	CNN2	3928	621	508	9974	11062
ENSG00000064687.8	ABCA7	8365	2519	2397	3284	3802
ENSG00000064692.14	SNCAIP	7325	785	874	920	907
ENSG00000064703.7	DDX20	6019	815	776	2183	2082
ENSG00000064763.6	FAR2	5411	1628	1589	944	904
ENSG00000064886.9	CHI3L2	3295	1052	987	1330	1310
ENSG00000064932.11	SBNO2	6476	1533	1598	5293	5853
ENSG00000064933.12	PMS1	5152	944	1164	1880	1903
ENSG00000064961.14	HMG20B	3857	1348	1177	9011	10445
ENSG00000064989.8	CALCRL	6144	674	899	299	343
ENSG00000064995.12	TAF11	1580	1714	1731	3240	3018
ENSG00000065000.11	AP3D1	8618	12497	12389	12965	14188
ENSG00000065029.10	ZNF76	6789	3151	2868	3329	3502
ENSG00000065054.9	SLC9A3R2	3550	5315	5095	1662	1927
ENSG00000065057.3	NTHL1	1658	1068	1014	1426	1541
ENSG00000065135.7	GNAI3	3206	2075	2371	6198	6206
ENSG00000065150.14	IPO5	9671	11255	11734	26647	26465
ENSG00000065154.7	OAT	3388	11686	11222	5447	5824
ENSG00000065183.11	WDR3	10275	1647	1715	6695	6319
ENSG00000065268.6	WDR18	2474	2070	1809	2726	3303
ENSG00000065308.4	TRAM2	6908	787	796	10767	11223
ENSG00000065320.4	NTN1	6431	886	900	373	375
ENSG00000065325.8	GLP2R	6052	244	224	555	496
ENSG00000065328.12	MCM10	5454	6	5	2650	2629
ENSG00000065357.15	DGKA	10215	2172	2024	2058	2097
ENSG00000065427.10	KARS	3815	5834	5554	18352	18752
ENSG00000065491.8	TBC1D22B	3462	1559	1640	1760	1910
ENSG00000065518.7	NDUFB4	1889	7288	6892	5127	5592
ENSG00000065534.14	MYLK	22166	5240	5561	1827	1689
ENSG00000065600.8	TMEM206	2914	1948	2017	1105	1191
ENSG00000065609.10	SNAP91	6657	23659	25129	22	31
ENSG00000065613.9	SLK	7974	4433	4975	5065	4916
ENSG00000065615.9	CYB5R4	9635	1117	1300	989	933
ENSG00000065621.10	GSTO2	10344	1136	1039	598	541
ENSG00000065675.10	PRKCQ	3285	868	834	869	815
ENSG00000065717.10	TLE2	4038	10035	9557	1140	1356
ENSG00000065802.7	ASB1	7410	3950	4029	3142	3430
ENSG00000065833.7	ME1	3378	1953	2118	1686	1683
ENSG00000065883.10	CDK13	8921	3339	3764	5112	4988
ENSG00000065911.7	MTHFD2	4870	715	825	11096	11146
ENSG00000065970.4	FOXJ2	6296	3753	3819	2670	2957
ENSG00000065978.13	YBX1	1930	8402	8860	59162	60787
ENSG00000065989.11	PDE4A	6644	6370	6250	1434	1521
ENSG00000066044.9	ELAVL1	6956	5830	5547	7520	7997
ENSG00000066056.9	TIE1	6694	1386	1238	428	439
ENSG00000066117.10	SMARCD1	5136	4314	4207	8737	9391
ENSG00000066135.8	KDM4A	5172	3167	3260	4775	4810
ENSG00000066185.8	ZMYND12	2195	211	235	26	33
ENSG00000066230.6	SLC9A3	2783	246	275	3	16
ENSG00000066248.10	NGEF	4687	12855	12737	1332	1341
ENSG00000066322.8	ELOVL1	2458	6111	5375	4248	4825
ENSG00000066336.7	SPI1	2069	580	502	601	650
ENSG00000066379.10	ZNRD1	3672	623	543	1907	1997
ENSG00000066382.12	MPPED2	8198	1023	1017	211	201
ENSG00000066455.8	GOLGA5	3295	2448	2343	3537	3479
ENSG00000066468.16	FGFR2	7543	10858	10772	973	1016
ENSG00000066629.12	EML1	8899	1844	1901	2253	2397
ENSG00000066651.13	TRMT11	2690	1375	1392	1395	1457
ENSG00000066654.8	THUMPD1	5092	2838	3319	3855	3652
ENSG00000066735.10	KIF26A	6756	205	197	1242	1411
ENSG00000066777.4	ARFGEF1	10970	3416	3762	4352	4558
ENSG00000066813.10	ACSM2B	8155	0	0	139	165
ENSG00000066827.11	ZFAT	8900	543	510	780	818
ENSG00000066855.11	MTFR1	4629	415	484	1747	1691
ENSG00000066926.6	FECH	4473	1717	1815	2677	2625
ENSG00000067048.12	DDX3Y	5738	4175	5022	3337	3413
ENSG00000067057.12	PFKP	4827	17825	16933	12450	13947
ENSG00000067082.10	KLF6	6139	3042	3403	8083	8507
ENSG00000067141.12	NEO1	8117	9286	9089	4080	4343
ENSG00000067167.3	TRAM1	3878	1747	2254	6311	6152
ENSG00000067177.10	PHKA1	6350	949	935	3165	3066
ENSG00000067182.3	TNFRSF1A	4005	2417	2442	6539	7178
ENSG00000067191.11	CACNB1	7094	6814	6597	697	830
ENSG00000067221.9	STOML1	6178	2918	3022	591	776
ENSG00000067225.13	PKM	8572	79633	76473	137976	147738
ENSG00000067248.5	DHX29	4728	2197	2489	3423	3344
ENSG00000067334.9	DNTTIP2	5985	2683	2725	5334	5046
ENSG00000067365.10	METTL22	4824	966	931	1543	1589
ENSG00000067369.9	TP53BP1	8843	5538	5891	5892	5899
ENSG00000067533.5	RRP15	7883	774	888	2490	2328
ENSG00000067596.6	DHX8	9302	2666	2902	5267	5124
ENSG00000067606.11	PRKCZ	7636	16491	15814	1509	1503
ENSG00000067646.7	ZFY	5737	446	536	209	238
ENSG00000067798.9	NAV3	11179	3923	4292	901	903
ENSG00000067829.14	IDH3G	2710	5145	4722	3610	4137
ENSG00000067836.8	ROGDI	3683	10124	9348	1218	1316
ENSG00000067840.8	PDZD4	4381	33156	32043	1501	1741
ENSG00000067842.13	ATP2B3	7534	7559	7480	21	20
ENSG00000067955.9	CBFB	4129	935	1147	3611	3573
ENSG00000068028.13	RASSF1	3677	1563	1522	2710	2799
ENSG00000068078.13	FGFR3	4834	8103	8003	3945	4409
ENSG00000068079.3	IFI35	1973	417	402	1121	1249
ENSG00000068137.10	PLEKHH3	4839	1445	1408	2029	2550
ENSG00000068305.13	MEF2A	7030	7511	8471	4958	4809
ENSG00000068308.9	OTUD5	3329	7251	7185	5277	5647
ENSG00000068323.12	TFE3	4278	7109	7074	4508	4852
ENSG00000068354.11	TBC1D25	4223	2334	2295	1325	1395
ENSG00000068383.14	INPP5A	3701	7803	8201	1085	1191
ENSG00000068394.9	GPKOW	1735	2235	2031	2121	2103
ENSG00000068400.9	GRIPAP1	5779	9805	9529	4233	4652
ENSG00000068438.10	FTSJ1	2740	2246	2104	4635	4933
ENSG00000068615.12	REEP1	5326	4718	4800	295	247
ENSG00000068654.11	POLR1A	13519	3108	3072	6699	7561
ENSG00000068697.6	LAPTM4A	1946	5672	5617	11271	11763
ENSG00000068745.10	IP6K2	5624	7506	7352	5461	5734
ENSG00000068793.13	CYFIP1	10435	3752	3885	6348	6647
ENSG00000068831.14	RASGRP2	6084	1765	1819	499	541
ENSG00000068878.10	PSME4	10259	2999	3166	7935	7688
ENSG00000068903.15	SIRT2	6204	17255	16483	2425	2695
ENSG00000068912.9	ERLEC1	2592	5091	5735	5155	5128
ENSG00000068971.9	PPP2R5B	3376	11766	11505	1527	1788
ENSG00000068976.9	PYGM	4981	1711	1669	89	135
ENSG00000068985.4	PAGE1	665	0	1	178	187
ENSG00000069011.11	PITX1	3511	0	5	1536	1838
ENSG00000069122.14	GPR116	6717	2603	2643	40	37
ENSG00000069188.12	SDK2	11607	571	628	647	668
ENSG00000069248.9	NUP133	5057	3934	4194	6314	6236
ENSG00000069345.7	DNAJA2	5039	6510	7250	5017	5134
ENSG00000069399.8	BCL3	3242	519	424	1452	1597
ENSG00000069424.10	KCNAB2	9253	27901	26945	5430	6172
ENSG00000069431.6	ABCC9	11421	893	895	84	89
ENSG00000069482.6	GAL	1300	68	71	2151	2327
ENSG00000069509.5	FUNDC1	1399	1638	1680	955	1056
ENSG00000069535.12	MAOB	3050	8561	7817	562	503
ENSG00000069667.11	RORA	17033	2972	4094	885	865
ENSG00000069696.6	DRD4	1477	173	140	93	90
ENSG00000069712.9	KIAA1107	4623	6320	7109	264	270
ENSG00000069812.7	HES2	5407	2	0	81	105
ENSG00000069849.6	ATP1B3	2584	7101	7035	11799	12262
ENSG00000069943.5	PIGB	4539	330	404	809	776
ENSG00000069966.14	GNB5	7487	7058	6926	1948	1920
ENSG00000069998.8	CECR5	4936	1819	1735	3568	4020
ENSG00000070010.14	UFD1L	8736	2608	2617	5699	5918
ENSG00000070018.4	LRP6	10337	2331	2495	3733	3494
ENSG00000070047.7	PHRF1	5769	3865	3542	4073	4991
ENSG00000070061.10	IKBKAP	6048	7176	7265	7317	7494
ENSG00000070159.9	PTPN3	10071	1437	1491	2256	2330
ENSG00000070182.13	SPTB	14771	12075	12322	799	897
ENSG00000070190.8	DAPP1	4548	49	43	524	501
ENSG00000070214.11	SLC44A1	12613	15066	15494	6430	6391
ENSG00000070367.11	EXOC5	9269	3165	3418	3779	3608
ENSG00000070388.7	FGF22	2110	144	158	6	23
ENSG00000070404.5	FSTL3	3144	1143	943	2766	3314
ENSG00000070423.13	RNF126	3677	2709	2573	3344	4079
ENSG00000070444.10	MNT	8728	3338	3307	3247	3681
ENSG00000070476.10	ZXDC	7357	1603	1493	2613	2688
ENSG00000070495.10	JMJD6	5949	3103	3158	2681	2787
ENSG00000070501.7	POLB	4106	4294	4662	1670	1537
ENSG00000070526.10	ST6GALNAC1	3448	196	182	373	520
ENSG00000070601.5	FRMPD1	6724	448	417	0	6
ENSG00000070610.10	GBA2	5079	11729	11070	4710	5355
ENSG00000070614.10	NDST1	9043	9883	9730	5324	5354
ENSG00000070669.12	ASNS	4455	7943	7561	9967	10286
ENSG00000070718.7	AP3M2	6276	6833	7018	2728	2678
ENSG00000070729.9	CNGB1	6039	205	264	44	48
ENSG00000070731.5	ST6GALNAC2	7558	79	119	2516	2644
ENSG00000070761.3	C16orf80	2371	2636	2560	2466	2529
ENSG00000070770.4	CSNK2A2	6905	3628	3725	7754	7707
ENSG00000070778.8	PTPN21	7396	1309	1265	1197	1199
ENSG00000070808.11	CAMK2A	6150	68171	66143	43	27
ENSG00000070814.13	TCOF1	11278	3992	3990	11927	12341
ENSG00000070886.6	EPHA8	5358	179	198	35	64
ENSG00000070950.5	RAD18	6983	491	501	2673	2629
ENSG00000070961.10	ATP2B1	9491	17296	19746	5515	5377
ENSG00000071051.9	NCK2	2990	3999	3913	2293	2532
ENSG00000071073.8	MGAT4A	9630	4326	4957	2690	2502
ENSG00000071082.6	RPL31	5791	20260	20222	44247	47361
ENSG00000071189.17	SNX13	16417	3160	3778	2912	2852
ENSG00000071243.11	ING3	5214	979	1020	1235	1099
ENSG00000071282.7	LMCD1	2578	649	726	755	720
ENSG00000071462.7	WBSCR22	7944	2625	2588	6232	7060
ENSG00000071537.9	SEL1L	9559	6822	7718	8326	8078
ENSG00000071539.9	TRIP13	3560	167	141	5154	5029
ENSG00000071553.12	ATP6AP1	4884	19961	18682	11408	12143
ENSG00000071794.11	HLTF	6024	3793	4396	7185	6493
ENSG00000071859.10	FAM50A	2567	4073	3805	5214	5616
ENSG00000071889.12	FAM3A	6240	3756	3416	3023	3367
ENSG00000071909.14	MYO3B	8236	15	16	173	136
ENSG00000071967.7	CYBRD1	5176	2850	3187	3822	3569
ENSG00000071991.4	CDH19	6864	698	893	136	151
ENSG00000071994.6	PDCD2	6476	2014	2086	5317	5320
ENSG00000072041.12	SLC6A15	8556	3991	4364	2398	2165
ENSG00000072062.9	PRKACA	6144	12370	12373	6316	7093
ENSG00000072071.12	LPHN1	6292	12781	12025	2960	3235
ENSG00000072133.6	RPS6KA6	2890	322	363	242	180
ENSG00000072135.8	PTPN18	5774	3742	3639	3198	3626
ENSG00000072163.14	LIMS2	8487	1192	1070	435	451
ENSG00000072182.8	ASIC4	5250	857	853	377	429
ENSG00000072195.10	SPEG	17910	6670	6371	1583	1743
ENSG00000072201.9	LNX1	5725	2479	2661	613	620
ENSG00000072274.8	TFRC	7887	5343	5910	28634	28023
ENSG00000072315.3	TRPC5	5839	247	240	4	3
ENSG00000072364.8	AFF4	11297	7746	9340	7836	7409
ENSG00000072401.10	UBE2D1	3486	720	943	570	636
ENSG00000072415.4	MPP5	8743	3057	3212	2302	2322
ENSG00000072501.13	SMC1A	10674	6075	6347	20411	19873
ENSG00000072518.16	MARK2	6154	4356	4354	4042	4286
ENSG00000072571.15	HMMR	3932	16	44	3391	3127
ENSG00000072682.14	P4HA2	8502	1069	1172	6489	6794
ENSG00000072756.12	TRNT1	5518	846	899	1711	1590
ENSG00000072778.15	ACADVL	4865	15752	15615	22407	24973
ENSG00000072803.13	FBXW11	5577	9908	10381	3930	4048
ENSG00000072818.7	ACAP1	7421	138	116	915	954
ENSG00000072832.10	CRMP1	5823	13766	13707	421	502
ENSG00000072840.8	EVC	7923	323	261	1621	1773
ENSG00000072849.6	DERL2	6386	1496	1480	2216	2309
ENSG00000072954.2	TMEM38A	3005	3181	3377	791	903
ENSG00000072958.4	AP1M1	3813	5872	5997	5453	6269
ENSG00000073009.8	IKBKG	7462	428	374	476	531
ENSG00000073060.11	SCARB1	8240	4071	4039	11993	13487
ENSG00000073067.9	CYP2W1	2773	4	1	414	463
ENSG00000073111.9	MCM2	4899	851	820	12587	13737
ENSG00000073150.9	PANX2	3102	4759	4495	516	550
ENSG00000073169.9	SELO	2363	2790	2659	1545	1779
ENSG00000073350.9	LLGL2	7909	1242	1121	6937	7946
ENSG00000073417.10	PDE8A	7886	2971	2833	3407	3595
ENSG00000073464.7	CLCN4	6750	13406	13607	319	339
ENSG00000073536.13	NLE1	5463	1544	1488	2806	3115
ENSG00000073578.12	SDHA	8383	13126	12892	15859	17174
ENSG00000073605.14	GSDMB	5917	1711	1633	1957	1954
ENSG00000073614.7	KDM5A	12091	2292	2337	5537	5319
ENSG00000073670.9	ADAM11	4770	12425	12098	449	547
ENSG00000073712.9	FERMT2	8510	4117	4301	5016	4676
ENSG00000073756.7	PTGS2	5269	341	375	3641	3383
ENSG00000073910.15	FRY	16059	7762	8276	378	432
ENSG00000073921.13	PICALM	5833	11708	13160	11876	11451
ENSG00000073969.14	NSF	5009	26110	26623	3305	3355
ENSG00000074047.16	GLI2	7341	180	168	515	597
ENSG00000074071.9	MRPS34	1097	3085	2918	5074	5877
ENSG00000074181.4	NOTCH3	8799	3215	3192	4003	4520
ENSG00000074211.9	PPP2R2C	9198	20328	21406	352	371
ENSG00000074266.13	EED	7016	1121	1249	2202	2190
ENSG00000074356.12	C17orf85	5717	1618	1813	3174	3202
ENSG00000074370.13	ATP2A3	6866	3619	3102	6207	7009
ENSG00000074410.9	CA12	7313	794	854	5068	5199
ENSG00000074416.9	MGLL	10056	19620	19358	5265	5440
ENSG00000074527.7	NTN4	4166	1686	1716	3284	3623
ENSG00000074582.8	BCS1L	3379	1411	1438	2338	2550
ENSG00000074590.9	NUAK1	7008	12123	12644	1087	1002
ENSG00000074621.9	SLC24A1	9084	244	219	1084	1054
ENSG00000074657.9	ZNF532	11951	9846	10131	3246	3230
ENSG00000074660.11	SCARF1	4957	769	747	135	146
ENSG00000074695.5	LMAN1	6767	3313	3755	15991	15412
ENSG00000074696.8	PTPLAD1	4469	10769	11700	11176	10874
ENSG00000074706.9	IPCEF1	8474	7618	8032	105	99
ENSG00000074855.6	ANO8	4979	4044	3786	2131	2305
ENSG00000074935.9	TUBE1	6973	2261	2491	1477	1499
ENSG00000074964.12	ARHGEF10L	7847	8408	8278	2130	2344
ENSG00000075035.5	WSCD2	6557	9381	9637	65	82
ENSG00000075043.13	KCNQ2	4029	5009	5038	401	432
ENSG00000075089.5	ACTR6	3813	1975	2186	1305	1315
ENSG00000075142.9	SRI	4237	6925	7767	3457	3889
ENSG00000075188.4	NUP37	2406	258	217	2630	2728
ENSG00000075213.6	SEMA3A	9371	480	598	2147	2212
ENSG00000075218.14	GTSE1	4242	64	62	3365	3788
ENSG00000075223.9	SEMA3C	6268	870	1158	6468	6148
ENSG00000075234.12	TTC38	3578	782	686	1646	1855
ENSG00000075239.9	ACAT1	5584	3794	3572	6029	6172
ENSG00000075240.12	GRAMD4	4886	2312	2394	2448	2819
ENSG00000075292.14	ZNF638	14127	10027	10484	9517	9165
ENSG00000075303.8	SLC25A40	5081	1571	1991	1819	1644
ENSG00000075336.7	TIMM21	3640	1648	1676	1764	1830
ENSG00000075340.18	ADD2	12673	16613	16381	3073	3015
ENSG00000075399.8	VPS9D1	3428	3676	3606	1018	1117
ENSG00000075407.13	ZNF37A	9626	2702	3021	2612	2102
ENSG00000075413.13	MARK3	8891	7099	6926	6365	6347
ENSG00000075618.13	FSCN1	3707	11230	10606	12578	14666
ENSG00000075643.5	MOCOS	6281	68	50	3051	3255
ENSG00000075702.12	WDR62	9775	124	140	3674	4068
ENSG00000075856.7	SART3	7270	4677	4643	6496	6547
ENSG00000075891.17	PAX2	6243	160	179	4	3
ENSG00000075975.11	MKRN2	2848	4036	3870	3138	3307
ENSG00000076003.4	MCM6	4118	1918	2001	11458	11740
ENSG00000076108.7	BAZ2A	10918	8175	7903	11997	12723
ENSG00000076201.10	PTPN23	5981	6704	6244	5281	6191
ENSG00000076242.10	MLH1	3748	1701	1794	4135	4170
ENSG00000076248.6	UNG	2567	1695	1655	6297	6687
ENSG00000076258.5	FMO4	2517	130	111	111	118
ENSG00000076344.11	RGS11	4798	11650	10810	508	569
ENSG00000076351.8	SLC46A1	7951	2525	2416	1605	1700
ENSG00000076356.6	PLXNA2	13781	9937	10090	1433	1413
ENSG00000076513.12	ANKRD13A	7350	2839	2918	4302	4218
ENSG00000076604.10	TRAF4	4594	1383	1155	6125	6272
ENSG00000076641.4	PAG1	11023	3468	3555	799	774
ENSG00000076650.2	GPATCH1	4488	926	993	1188	1351
ENSG00000076662.5	ICAM3	2950	151	124	2349	2778
ENSG00000076706.10	MCAM	7420	10150	9782	6308	6804
ENSG00000076716.7	GPC4	5057	727	745	1542	1435
ENSG00000076770.10	MBNL3	12199	164	184	3938	3700
ENSG00000076826.5	CAMSAP3	4845	3099	3047	1211	1491
ENSG00000076864.15	RAP1GAP	5650	22083	20924	1966	2085
ENSG00000076924.7	XAB2	4673	4042	3958	4216	4706
ENSG00000076928.13	ARHGEF1	8630	3657	3554	7212	7858
ENSG00000076984.13	MAP2K7	5145	3944	3969	3422	3723
ENSG00000077009.9	NMRK2	1141	7	27	345	435
ENSG00000077063.6	CTTNBP2	7035	2919	3162	730	814
ENSG00000077080.5	ACTL6B	2389	3966	3624	2	2
ENSG00000077147.10	TM9SF3	7095	7186	8578	9000	8441
ENSG00000077150.13	NFKB2	4479	577	557	3661	4063
ENSG00000077152.5	UBE2T	1065	554	531	3842	3610
ENSG00000077235.13	GTF3C1	11562	8668	8520	10674	11260
ENSG00000077238.9	IL4R	6091	1245	1309	3047	3049
ENSG00000077254.10	USP33	6918	7290	8468	4259	4210
ENSG00000077274.7	CAPN6	3568	4	8	217	224
ENSG00000077279.12	DCX	10139	566	507	18	33
ENSG00000077312.4	SNRPA	2361	2316	2319	7860	8153
ENSG00000077348.4	EXOSC5	1488	904	801	1817	2222
ENSG00000077380.11	DYNC1I2	4695	9131	9037	5958	6036
ENSG00000077458.8	FAM76B	6042	907	1003	1227	1361
ENSG00000077463.10	SIRT6	2787	1244	1184	1363	1672
ENSG00000077498.8	TYR	3016	1	1	5070	5042
ENSG00000077522.8	ACTN2	5419	4150	4178	70	107
ENSG00000077549.13	CAPZB	3476	11216	10250	11355	12246
ENSG00000077585.9	GPR137B	2279	2038	2183	824	910
ENSG00000077616.6	NAALAD2	7254	515	633	284	235
ENSG00000077684.11	PHF17	9110	3022	3149	3973	3973
ENSG00000077721.11	UBE2A	3251	2619	2849	4762	4857
ENSG00000077809.8	GTF2I	10442	7310	7377	9452	9711
ENSG00000077935.12	SMC1B	4253	5	5	123	87
ENSG00000077942.13	FBLN1	7136	1923	1949	5151	5385
ENSG00000077943.7	ITGA8	7528	465	615	143	184
ENSG00000077984.4	CST7	930	33	29	1513	1735
ENSG00000078018.15	MAP2	11559	55300	59159	242	233
ENSG00000078061.8	ARAF	3497	1883	1817	4468	5253
ENSG00000078070.7	MCCC1	4321	2449	2260	2361	2341
ENSG00000078081.3	LAMP3	3816	3	4	308	282
ENSG00000078098.9	FAP	7003	107	116	504	473
ENSG00000078142.7	PIK3C3	15176	4354	4933	3004	2831
ENSG00000078237.4	C12orf5	1602	538	523	1051	901
ENSG00000078295.11	ADCY2	17784	9537	9252	215	263
ENSG00000078369.13	GNB1	6351	47830	47625	23891	24816
ENSG00000078401.6	EDN1	2033	1172	1158	1063	896
ENSG00000078403.12	MLLT10	6844	2224	2353	2821	2816
ENSG00000078487.13	ZCWPW1	3318	610	588	418	415
ENSG00000078549.10	ADCYAP1R1	6828	9647	9854	85	124
ENSG00000078596.6	ITM2A	2051	4072	3785	4322	4387
ENSG00000078668.9	VDAC3	3144	11570	11759	8353	8410
ENSG00000078674.13	PCM1	12470	8884	9345	10910	10489
ENSG00000078699.17	CBFA2T2	9457	4203	4134	2971	3256
ENSG00000078725.8	BRINP1	3905	7065	6893	225	221
ENSG00000078804.8	TP53INP2	4228	22932	22306	4309	4432
ENSG00000078808.12	SDF4	4709	9076	8647	11732	13490
ENSG00000078898.6	BPIFB2	1898	7	2	4221	4601
ENSG00000078900.10	TP73	6763	567	523	656	718
ENSG00000078902.11	TOLLIP	5983	20125	19256	2493	2604
ENSG00000078967.8	UBE2D4	4713	2435	2512	1287	1453
ENSG00000079102.12	RUNX1T1	13527	3303	3428	45	23
ENSG00000079134.7	THOC1	8099	2095	1993	3136	3087
ENSG00000079150.13	FKBP7	3080	204	234	658	651
ENSG00000079156.12	OSBPL6	8028	2406	2441	900	858
ENSG00000079215.9	SLC1A3	6265	56896	59866	1104	1091
ENSG00000079246.11	XRCC5	5463	13911	14765	31788	31106
ENSG00000079257.3	LXN	1504	246	268	600	581
ENSG00000079332.10	SAR1A	6914	5993	6772	6220	6018
ENSG00000079337.11	RAPGEF3	11995	4618	4582	300	318
ENSG00000079393.16	DUSP13	2349	6	3	105	137
ENSG00000079432.3	CIC	9494	15515	14803	6848	7699
ENSG00000079459.8	FDFT1	5202	8962	9200	17547	17894
ENSG00000079462.3	PAFAH1B3	1419	1767	1819	2127	2447
ENSG00000079616.8	KIF22	4312	1541	1648	9890	10422
ENSG00000079689.9	SCGN	1447	1637	1757	22	14
ENSG00000079785.10	DDX1	3817	9458	9472	11678	11186
ENSG00000079819.12	EPB41L2	10247	9482	9891	6064	5828
ENSG00000079841.14	RIMS1	12800	11679	12429	24	17
ENSG00000079931.10	MOXD1	5293	1039	858	1896	2141
ENSG00000079950.9	STX7	16387	5816	7012	2595	2565
ENSG00000079974.13	RABL2B	5870	2424	2604	1166	1170
ENSG00000080007.6	DDX43	2807	35	45	153	145
ENSG00000080031.5	PTPRH	4344	462	413	1691	1733
ENSG00000080189.10	SLC35C2	4106	2844	2605	4525	4906
ENSG00000080200.5	CRYBG3	5003	1041	1253	1193	1176
ENSG00000080224.13	EPHA6	6303	363	346	43	53
ENSG00000080345.13	RIF1	18166	4470	4802	6778	6353
ENSG00000080371.4	RAB21	6670	3169	3744	2611	2671
ENSG00000080493.9	SLC4A4	8361	7139	7586	278	273
ENSG00000080503.15	SMARCA2	7132	13374	13813	4188	3944
ENSG00000080561.9	MID2	3097	562	551	258	255
ENSG00000080573.6	COL5A3	6750	3519	3684	744	817
ENSG00000080608.9	KIAA0020	2707	417	516	3730	3670
ENSG00000080618.9	CPB2	1767	1	0	616	600
ENSG00000080644.11	CHRNA3	4765	615	629	47	69
ENSG00000080709.10	KCNN2	3995	764	818	50	94
ENSG00000080802.14	CNOT4	6999	2385	2566	1708	1694
ENSG00000080823.17	MOK	10996	1279	1252	1733	1642
ENSG00000080824.14	HSP90AA1	5248	123114	127053	135700	133854
ENSG00000080845.13	DLGAP4	8789	8382	8031	7050	7379
ENSG00000080947.10	CROCCP3	6813	1486	1620	309	296
ENSG00000080986.8	NDC80	3600	5	1	2862	2850
ENSG00000081019.9	RSBN1	6819	2250	2463	1886	1706
ENSG00000081041.8	CXCL2	1500	87	121	252	322
ENSG00000081051.3	AFP	3259	40	39	33816	33386
ENSG00000081052.10	COL4A4	9895	260	284	317	266
ENSG00000081059.15	TCF7	10063	153	125	11363	12298
ENSG00000081087.10	OSTM1	5325	1540	1731	3319	3294
ENSG00000081154.7	PCNP	3102	7744	8468	7742	7097
ENSG00000081177.14	EXD2	4601	3224	3303	1686	1808
ENSG00000081181.3	ARG2	2418	1516	1363	1511	1535
ENSG00000081189.9	MEF2C	9053	16116	18109	1161	1134
ENSG00000081237.14	PTPRC	8507	526	645	2431	2237
ENSG00000081277.7	PKP1	6211	144	158	453	449
ENSG00000081307.8	UBA5	6827	3153	3443	3648	3684
ENSG00000081320.6	STK17B	6580	561	563	2017	1752
ENSG00000081377.12	CDC14B	10457	2315	2188	2103	1988
ENSG00000081386.8	ZNF510	5921	2170	2331	1200	1129
ENSG00000081479.8	LRP2	16260	3390	3472	255	265
ENSG00000081692.8	JMJD4	4315	877	815	1617	1718
ENSG00000081721.7	DUSP12	1762	946	1001	1466	1513
ENSG00000081760.12	AACS	16089	4174	3906	2743	3028
ENSG00000081791.4	KIAA0141	6047	5453	5034	4566	4861
ENSG00000081818.1	PCDHB4	3621	1032	1107	72	89
ENSG00000081870.7	HSPB11	3236	854	846	1727	1780
ENSG00000081923.6	ATP8B1	6652	241	209	1388	1577
ENSG00000081985.6	IL12RB2	4233	241	288	40	45
ENSG00000082014.12	SMARCD3	5198	8569	8399	1111	1295
ENSG00000082068.4	WDR70	7039	1564	1485	2875	3047
ENSG00000082153.13	BZW1	4593	3964	4391	12916	12848
ENSG00000082175.10	PGR	15305	143	143	486	487
ENSG00000082212.7	ME2	3427	2289	2457	4072	3901
ENSG00000082213.13	C5orf22	4172	1702	1677	2497	2579
ENSG00000082258.8	CCNT2	9081	3529	3771	3236	3091
ENSG00000082293.8	COL19A1	8333	650	720	60	39
ENSG00000082482.9	KCNK2	3910	516	486	707	788
ENSG00000082497.7	SERTAD4	5467	690	701	589	534
ENSG00000082512.10	TRAF5	9022	527	596	2421	2414
ENSG00000082515.12	MRPL22	5267	1247	1236	2136	2083
ENSG00000082516.8	GEMIN5	5637	1475	1480	3650	3729
ENSG00000082556.6	OPRK1	5730	368	431	50	30
ENSG00000082641.11	NFE2L1	5825	20519	20287	23506	25060
ENSG00000082701.10	GSK3B	8006	7942	8663	5671	5682
ENSG00000082898.12	XPO1	11708	8006	9189	20332	20180
ENSG00000082996.15	RNF13	3635	5313	5633	2357	2315
ENSG00000083093.5	PALB2	4740	726	738	2395	2466
ENSG00000083099.6	LYRM2	8679	2293	2672	2643	2456
ENSG00000083123.10	BCKDHB	4102	1285	1328	1206	1294
ENSG00000083223.13	ZCCHC6	6707	1147	1109	2306	2337
ENSG00000083290.15	ULK2	9843	5900	5768	1188	1178
ENSG00000083307.6	GRHL2	6060	5	5	1070	1140
ENSG00000083444.12	PLOD1	5320	3511	3457	22189	24192
ENSG00000083457.7	ITGAE	6657	859	879	933	1050
ENSG00000083520.10	DIS3	7602	2935	3032	4904	4677
ENSG00000083544.9	TDRD3	4112	1142	1259	1980	1896
ENSG00000083642.14	PDS5B	13212	3784	4062	3335	3052
ENSG00000083720.8	OXCT1	4194	10260	10631	5684	5451
ENSG00000083750.8	RRAGB	2725	2082	2037	805	877
ENSG00000083812.7	ZNF324	3795	798	745	562	643
ENSG00000083814.8	ZNF671	3532	1297	1249	345	451
ENSG00000083817.8	ZNF416	2561	393	402	375	333
ENSG00000083838.11	ZNF446	4923	1606	1367	827	877
ENSG00000083844.6	ZNF264	3042	325	346	448	374
ENSG00000083845.4	RPS5	3617	11230	10927	41081	47802
ENSG00000083857.9	FAT1	16168	5801	5737	15169	15319
ENSG00000083896.8	YTHDC1	7032	5777	6629	5649	5772
ENSG00000083937.4	CHMP2B	3106	2102	2374	2103	2140
ENSG00000084073.4	ZMPSTE24	3572	1676	1926	3059	2798
ENSG00000084090.9	STARD7	4414	12372	12884	12979	13397
ENSG00000084092.6	NOA1	3415	1357	1536	2213	2288
ENSG00000084093.11	REST	7875	392	504	2517	2637
ENSG00000084110.6	HAL	5146	6	2	285	316
ENSG00000084207.11	GSTP1	1925	8023	7957	16039	17597
ENSG00000084444.9	KIAA1467	6807	7075	7042	1538	1704
ENSG00000084453.12	SLCO1A2	11637	8642	9500	309	333
ENSG00000084463.3	WBP11	3418	5874	6077	11070	11444
ENSG00000084623.7	EIF3I	1725	6601	6272	16414	17581
ENSG00000084628.5	NKAIN1	2987	2241	2025	850	974
ENSG00000084636.13	COL16A1	9365	7475	7120	2918	3298
ENSG00000084652.11	TXLNA	5103	4082	4088	9129	9629
ENSG00000084674.9	APOB	14828	130	72	78285	74229
ENSG00000084731.9	KIF3C	6397	24867	25152	1828	1775
ENSG00000084734.4	GCKR	3149	117	114	302	323
ENSG00000084754.6	HADHA	3971	8732	8937	18710	18382
ENSG00000084764.6	MAPRE3	3459	16504	16314	1109	1118
ENSG00000084774.9	CAD	8422	2835	2651	13886	15269
ENSG00000085117.7	CD82	4054	2399	2169	2027	2170
ENSG00000085185.11	BCORL1	7996	1378	1182	1566	1926
ENSG00000085224.16	ATRX	12224	6561	7698	6227	6018
ENSG00000085231.9	TAF9	4050	4035	4256	6508	6539
ENSG00000085274.11	MYNN	5730	1268	1219	1347	1428
ENSG00000085365.13	SCAMP1	6842	4868	5895	1959	1859
ENSG00000085415.11	SEH1L	10481	2746	3290	3924	3882
ENSG00000085449.10	WDFY1	5516	2768	2995	4292	4353
ENSG00000085465.11	OVGP1	2988	883	750	199	238
ENSG00000085491.11	SLC25A24	6548	323	376	3165	3177
ENSG00000085511.15	MAP3K4	7522	3008	3148	3292	3214
ENSG00000085552.12	IGSF9	6620	36	38	613	680
ENSG00000085563.10	ABCB1	5552	1900	1879	406	390
ENSG00000085644.9	ZNF213	6443	2260	1898	998	1198
ENSG00000085662.9	AKR1B1	3660	7060	6637	8574	9241
ENSG00000085721.8	RRN3	4156	2425	2647	3640	3621
ENSG00000085733.11	CTTN	6949	11551	11669	14527	15542
ENSG00000085741.8	WNT11	2401	146	170	113	159
ENSG00000085760.10	MTIF2	3371	1554	1698	4329	4070
ENSG00000085788.9	DDHD2	10686	9724	10697	3779	3739
ENSG00000085831.11	TTC39A	9362	397	403	880	863
ENSG00000085832.12	EPS15	7551	11971	13014	4369	4094
ENSG00000085840.8	ORC1	3157	47	47	3542	3863
ENSG00000085871.4	MGST2	3182	844	848	1750	1905
ENSG00000085982.9	USP40	9352	2000	1995	2317	2413
ENSG00000085998.9	POMGNT1	6366	7663	6793	5242	5713
ENSG00000085999.7	RAD54L	3212	149	112	3162	3743
ENSG00000086015.16	MAST2	7877	4845	4974	6632	6952
ENSG00000086061.11	DNAJA1	2730	16080	17373	18520	18347
ENSG00000086062.8	B4GALT1	5065	922	1103	9659	10164
ENSG00000086065.9	CHMP5	2237	5283	5500	3813	3785
ENSG00000086102.14	NFX1	7147	4102	3964	5007	4960
ENSG00000086159.8	AQP6	5129	211	140	27	19
ENSG00000086189.5	DIMT1	3736	739	836	2016	1895
ENSG00000086205.12	FOLH1	3824	2160	2257	49	52
ENSG00000086300.11	SNX10	3421	4545	5364	1513	1339
ENSG00000086475.10	SEPHS1	3979	2749	2857	5758	6032
ENSG00000086504.11	MRPL28	2404	3525	3518	4511	5102
ENSG00000086506.2	HBQ1	536	94	72	99	125
ENSG00000086544.2	ITPKC	3385	1406	1463	1784	1863
ENSG00000086570.8	FAT2	14537	31799	31547	49	25
ENSG00000086589.7	RBM22	3631	3708	3745	3812	3974
ENSG00000086598.6	TMED2	3822	4882	5145	12239	12366
ENSG00000086619.9	ERO1LB	5688	1007	1233	584	566
ENSG00000086666.14	ZFAND6	5065	1967	1984	3204	3161
ENSG00000086696.6	HSD17B2	2688	0	1	300	289
ENSG00000086717.14	PPEF1	3515	316	295	17	46
ENSG00000086730.12	LAT2	4542	627	517	1159	1269
ENSG00000086967.9	MYBPC2	3708	65	57	205	238
ENSG00000087008.11	ACOX3	3846	779	799	820	1035
ENSG00000087074.7	PPP1R15A	3093	3122	3346	6688	7229
ENSG00000087076.4	HSD17B14	1281	1320	1139	175	208
ENSG00000087077.7	TRIP6	2802	1476	1284	4326	5048
ENSG00000087085.9	ACHE	3730	3781	3228	170	157
ENSG00000087086.9	FTL	878	61824	60181	124618	136061
ENSG00000087087.14	SRRT	4587	6775	6820	12798	13905
ENSG00000087088.15	BAX	2587	1030	925	3345	3687
ENSG00000087116.9	ADAMTS2	7687	389	451	566	611
ENSG00000087152.11	ATXN7L3	5301	13923	13370	5657	6279
ENSG00000087191.8	PSMC5	4483	10725	10624	10419	11389
ENSG00000087206.12	UIMC1	4852	1440	1368	2537	2562
ENSG00000087237.6	CETP	2085	17	12	138	170
ENSG00000087245.8	MMP2	4933	326	306	31039	32688
ENSG00000087250.4	MT3	1837	19235	18206	10	11
ENSG00000087263.12	OGFOD1	5806	2463	2640	5363	5017
ENSG00000087266.11	SH3BP2	13968	2343	2414	3247	3538
ENSG00000087269.11	NOP14	3538	2011	1935	4897	5094
ENSG00000087274.12	ADD1	13106	32577	32100	11924	12041
ENSG00000087301.4	TXNDC16	4739	1694	1936	1051	956
ENSG00000087302.4	C14orf166	2334	2974	3228	7795	7806
ENSG00000087303.12	NID2	6158	250	296	5311	5568
ENSG00000087338.4	GMCL1	4922	921	1072	1930	1953
ENSG00000087448.5	KLHL42	7622	5226	5667	2927	2941
ENSG00000087460.19	GNAS	13320	132966	126699	81191	87765
ENSG00000087470.13	DNM1L	7184	10992	11585	7156	6556
ENSG00000087494.11	PTHLH	3377	230	250	173	136
ENSG00000087495.12	PHACTR3	6095	6688	6802	85	113
ENSG00000087502.13	ERGIC2	5826	1847	2200	2838	2722
ENSG00000087510.5	TFAP2C	3112	43	49	2609	2597
ENSG00000087586.13	AURKA	2928	136	143	7036	7005
ENSG00000087589.12	CASS4	4025	79	64	234	204
ENSG00000087842.6	PIR	2512	960	1003	2574	2540
ENSG00000087916.7	SLC6A14	4521	3	1	1263	1275
ENSG00000087995.11	METTL2A	3114	656	634	1603	1767
ENSG00000088002.7	SULT2B1	2822	72	51	411	451
ENSG00000088035.11	ALG6	4950	304	366	909	823
ENSG00000088038.13	CNOT3	6697	4150	4078	5248	5764
ENSG00000088205.8	DDX18	7851	3401	3714	8988	8790
ENSG00000088256.4	GNA11	6242	11053	10508	3942	4397
ENSG00000088280.14	ASAP3	4988	1802	1911	1657	1686
ENSG00000088305.14	DNMT3B	4630	243	223	5819	5830
ENSG00000088325.11	TPX2	3605	343	320	18179	17769
ENSG00000088340.11	FER1L4	9212	245	255	2151	2655
ENSG00000088356.4	PDRG1	1385	1649	1641	2168	2270
ENSG00000088451.6	TGDS	2586	373	385	1497	1383
ENSG00000088538.12	DOCK3	8755	13046	13136	506	553
ENSG00000088543.10	C3orf18	3242	3742	3667	537	554
ENSG00000088756.8	ARHGAP28	11910	74	96	369	372
ENSG00000088766.7	CRLS1	5370	1535	1781	2412	2647
ENSG00000088826.13	SMOX	4943	2957	2811	2018	2380
ENSG00000088827.8	SIGLEC1	7886	104	149	13	21
ENSG00000088832.10	FKBP1A	2369	8739	8567	13599	14315
ENSG00000088836.8	SLC4A11	4081	347	348	930	1061
ENSG00000088882.7	CPXM1	2391	100	51	2612	3031
ENSG00000088888.13	MAVS	4240	1311	1254	3449	3565
ENSG00000088899.10	LZTS3	5349	24930	23533	1273	1382
ENSG00000088926.9	F11	4243	5	15	326	347
ENSG00000088930.6	XRN2	3489	2910	3078	11280	11586
ENSG00000088970.11	PLK1S1	4802	2533	2537	2950	2831
ENSG00000088986.6	DYNLL1	2957	18048	18475	9780	9918
ENSG00000088992.13	TESC	1926	1301	1045	1107	1203
ENSG00000089009.11	RPL6	4447	21262	20845	67546	69909
ENSG00000089022.9	MAPKAPK5	5576	1731	1660	3241	3375
ENSG00000089048.10	ESF1	3216	1143	1163	2847	2707
ENSG00000089050.10	RBBP9	3861	1041	1155	1770	1604
ENSG00000089053.8	ANAPC5	12304	10766	10579	12176	12620
ENSG00000089057.10	SLC23A2	7523	11316	11373	5087	5337
ENSG00000089060.7	SLC8B1	6768	1305	1331	1778	1896
ENSG00000089063.10	TMEM230	2038	5731	6137	7577	7135
ENSG00000089094.12	KDM2B	13623	3201	3313	5461	5619
ENSG00000089101.13	C20orf26	7319	95	155	13	12
ENSG00000089116.3	LHX5	3125	165	112	32	24
ENSG00000089123.11	TASP1	3365	472	383	588	692
ENSG00000089127.8	OAS1	3910	323	336	1129	1053
ENSG00000089157.11	RPLP0	4001	17587	17094	141346	153735
ENSG00000089159.11	PXN	7452	4095	3698	8242	8889
ENSG00000089163.4	SIRT4	1222	229	273	66	109
ENSG00000089169.10	RPH3A	10381	28148	25880	64	60
ENSG00000089195.10	TRMT6	3754	1206	1310	2308	2174
ENSG00000089199.5	CHGB	4535	42635	44579	323	292
ENSG00000089220.4	PEBP1	1780	67526	68322	17499	18653
ENSG00000089248.6	ERP29	3083	5371	5420	12345	13368
ENSG00000089280.14	FUS	7218	19278	19144	35632	38813
ENSG00000089289.11	IGBP1	1862	3711	3755	4334	4425
ENSG00000089327.10	FXYD5	2993	567	492	6791	7311
ENSG00000089335.16	ZNF302	5032	4469	5284	1544	1579
ENSG00000089351.10	GRAMD1A	5942	3957	3766	4449	5257
ENSG00000089356.12	FXYD3	3385	157	142	1237	1382
ENSG00000089472.12	HEPH	7113	1991	1976	2170	2103
ENSG00000089486.12	CDIP1	4268	16981	15971	2318	2539
ENSG00000089558.4	KCNH4	3924	357	321	31	95
ENSG00000089597.12	GANAB	4933	12593	12397	56364	59356
ENSG00000089639.6	GMIP	3740	367	370	1563	1627
ENSG00000089682.12	RBM41	6105	693	764	1438	1359
ENSG00000089685.10	BIRC5	3815	53	32	6211	6626
ENSG00000089692.4	LAG3	3056	60	46	194	200
ENSG00000089693.6	MLF2	3773	20689	19314	11982	12944
ENSG00000089723.5	OTUB2	4252	203	220	220	272
ENSG00000089737.11	DDX24	6007	24402	24060	11767	11832
ENSG00000089775.7	ZBTB25	12229	1053	1151	1410	1572
ENSG00000089818.12	NECAP1	4155	11963	12300	2621	2764
ENSG00000090006.13	LTBP4	8109	2208	1910	5813	6830
ENSG00000090013.5	BLVRB	1665	1454	1413	3512	4055
ENSG00000090020.6	SLC9A1	5974	4249	3706	3129	3440
ENSG00000090054.9	SPTLC1	3658	2748	2869	3583	3751
ENSG00000090060.13	PAPOLA	12766	7222	8265	12619	11894
ENSG00000090104.7	RGS1	4117	693	996	19	25
ENSG00000090238.7	YPEL3	3181	15114	13935	2195	2511
ENSG00000090263.11	MRPS33	1818	1493	1347	2628	2600
ENSG00000090273.9	NUDC	2856	9440	9650	11927	12515
ENSG00000090316.11	MAEA	9857	4734	4734	3726	4230
ENSG00000090339.4	ICAM1	3706	774	667	6312	7056
ENSG00000090372.10	STRN4	7641	5735	5359	6213	7216
ENSG00000090376.4	IRAK3	10004	472	448	356	303
ENSG00000090382.2	LYZ	1764	124	186	9436	9691
ENSG00000090432.5	MUL1	2436	1910	1783	2357	2467
ENSG00000090447.7	TFAP4	7867	843	863	1538	1688
ENSG00000090470.10	PDCD7	3263	1912	1898	3518	3640
ENSG00000090487.6	SPG21	3984	3075	2990	6326	6635
ENSG00000090520.6	DNAJB11	6040	2329	2303	7086	7150
ENSG00000090534.13	THPO	1915	201	232	62	96
ENSG00000090581.5	GNPTG	3672	6702	6191	2838	3189
ENSG00000090659.13	CD209	4428	173	130	3	2
ENSG00000090661.7	CERS4	4059	3222	2834	1244	1550
ENSG00000090686.11	USP48	9497	5733	6205	6886	6935
ENSG00000090776.5	EFNB1	3314	583	511	2136	2314
ENSG00000090857.9	PDPR	9148	3529	3315	6057	6053
ENSG00000090905.13	TNRC6A	12522	7980	8407	6355	6226
ENSG00000090920.9	FCGBP	16564	723	764	163	220
ENSG00000090932.6	DLL3	2618	357	412	1192	1408
ENSG00000090971.4	NAT14	2163	3000	2867	1434	1651
ENSG00000091039.12	OSBPL8	9198	3262	4023	4567	4281
ENSG00000091073.15	DTX2	5042	333	406	1012	1109
ENSG00000091127.9	PUS7	4421	678	736	3926	3875
ENSG00000091129.15	NRCAM	7939	22884	26332	2281	2327
ENSG00000091137.7	SLC26A4	5800	248	253	102	81
ENSG00000091140.8	DLD	5299	3979	4240	6778	6712
ENSG00000091164.8	TXNL1	11298	5482	5893	3850	3727
ENSG00000091262.10	ABCC6	7559	40	49	540	661
ENSG00000091317.7	CMTM6	4413	921	1059	4737	4453
ENSG00000091409.10	ITGA6	6704	2486	2618	5964	5672
ENSG00000091428.13	RAPGEF4	7161	20965	21649	410	340
ENSG00000091436.12	MLTK	13799	1382	1517	4469	4530
ENSG00000091482.5	SMPX	1040	196	243	13	17
ENSG00000091483.6	FH	2142	4788	4715	8726	8878
ENSG00000091490.6	SEL1L3	7483	5333	5373	3391	3359
ENSG00000091527.11	CDV3	4367	6033	6663	16813	16042
ENSG00000091542.8	ALKBH5	3190	8830	8566	7673	8284
ENSG00000091583.6	APOH	1332	9	6	10345	10420
ENSG00000091622.11	PITPNM3	10609	10534	10654	583	719
ENSG00000091640.3	SPAG7	2831	2949	2784	2670	3064
ENSG00000091651.4	ORC6	4309	275	305	2929	2886
ENSG00000091656.11	ZFHX4	15696	779	810	404	458
ENSG00000091664.7	SLC17A6	4219	844	1063	2	0
ENSG00000091732.11	ZC3HC1	3011	947	706	2199	2324
ENSG00000091831.17	ESR1	13629	30	25	1324	1351
ENSG00000091844.3	RGS17	7899	587	761	288	274
ENSG00000091879.9	ANGPT2	6784	532	620	3	1
ENSG00000091947.5	TMEM101	3029	873	875	1804	2068
ENSG00000091986.11	CCDC80	5305	1148	1022	4139	4158
ENSG00000092010.10	PSME1	1781	2758	2620	10355	10938
ENSG00000092020.6	PPP2R3C	3863	1602	1858	1689	1661
ENSG00000092067.5	CEBPE	1554	4	3	105	106
ENSG00000092094.6	OSGEP	5041	3289	3283	2782	2948
ENSG00000092096.10	SLC22A17	4278	39326	37420	933	927
ENSG00000092108.16	SCFD1	6571	2478	2745	3962	3967
ENSG00000092140.10	G2E3	10025	738	885	1891	1718
ENSG00000092199.13	HNRNPC	7315	19976	20229	38773	38917
ENSG00000092201.5	SUPT16H	7151	9538	9396	21909	21986
ENSG00000092203.9	TOX4	7076	5863	5929	5763	6117
ENSG00000092208.12	GEMIN2	2532	557	580	1126	1006
ENSG00000092295.7	TGM1	3735	458	458	221	225
ENSG00000092330.11	TINF2	2712	3078	3272	2937	3047
ENSG00000092439.9	TRPM7	9198	1764	1954	5968	5852
ENSG00000092445.7	TYRO3	6697	15655	15032	2891	3394
ENSG00000092470.7	WDR76	4078	429	438	2708	2933
ENSG00000092531.5	SNAP23	5893	1008	1134	3002	2904
ENSG00000092607.9	TBX15	3806	76	70	177	190
ENSG00000092621.7	PHGDH	5622	6252	5961	15871	18183
ENSG00000092758.11	COL9A3	4831	3411	3107	5679	6601
ENSG00000092820.13	EZR	3336	4228	4368	12852	13687
ENSG00000092847.6	AGO1	12886	4844	4603	5564	5561
ENSG00000092853.9	CLSPN	5411	80	70	2896	3154
ENSG00000092929.7	UNC13D	7752	796	749	3777	4391
ENSG00000092969.7	TGFB2	5151	1240	1361	946	876
ENSG00000092978.6	GPATCH2	8833	665	666	1099	1019
ENSG00000093009.5	CDC45	2846	9	19	4342	4845
ENSG00000093072.11	CECR1	5136	1503	1458	919	874
ENSG00000093183.9	SEC22C	8159	4345	4161	3322	3479
ENSG00000093217.5	XYLB	5343	241	228	1072	1190
ENSG00000094631.14	HDAC6	10412	7774	7283	6122	6600
ENSG00000094755.12	GABRP	4621	2	0	125	111
ENSG00000094796.4	KRT31	1596	834	853	1	2
ENSG00000094804.5	CDC6	3382	152	180	6290	6067
ENSG00000094841.9	UPRT	2825	733	789	774	745
ENSG00000094880.6	CDC23	4616	1637	1797	4341	4115
ENSG00000094914.8	AAAS	4138	2853	2732	4809	5336
ENSG00000094963.9	FMO2	6239	116	168	8	0
ENSG00000094975.9	SUCO	7835	1804	1911	3487	3532
ENSG00000095059.11	DHPS	3006	6384	5927	5226	5321
ENSG00000095261.9	PSMD5	4432	2096	2018	4353	4034
ENSG00000095370.15	SH2D3C	4599	1682	1578	544	524
ENSG00000095380.10	NANS	4922	1389	1244	3795	3887
ENSG00000095383.15	TBC1D2	3563	1129	983	576	629
ENSG00000095397.9	DFNB31	5542	4101	3889	3688	4058
ENSG00000095564.9	BTAF1	7673	3577	3577	7970	8026
ENSG00000095574.7	IKZF5	4821	1830	2175	1060	1076
ENSG00000095585.12	BLNK	3706	146	141	627	524
ENSG00000095587.8	TLL2	8151	486	550	99	76
ENSG00000095596.7	CYP26A1	2485	129	142	294	311
ENSG00000095627.5	TDRD1	5256	50	48	237	175
ENSG00000095637.16	SORBS1	10819	16971	17290	1219	1238
ENSG00000095739.7	BAMBI	2314	739	827	5877	6376
ENSG00000095752.2	IL11	2671	130	115	200	257
ENSG00000095787.17	WAC	12188	17405	18227	9551	9299
ENSG00000095906.12	NUBP2	4983	2781	2664	3584	4316
ENSG00000095932.5	C19orf77	1077	162	184	299	269
ENSG00000095970.12	TREM2	1095	441	504	7	10
ENSG00000096006.7	CRISP3	2247	0	0	235	173
ENSG00000096063.10	SRPK1	6692	3469	3541	11749	11264
ENSG00000096070.15	BRPF3	6618	5256	5092	4018	4295
ENSG00000096080.7	MRPS18A	1284	1760	1674	2668	2951
ENSG00000096088.12	PGC	2025	15	37	870	1024
ENSG00000096092.5	TMEM14A	992	2600	2838	959	1010
ENSG00000096093.10	EFHC1	7510	1412	1430	1794	1897
ENSG00000096384.15	HSP90AB1	2796	104048	102260	163702	165783
ENSG00000096433.6	ITPR3	9870	1043	1025	15860	17062
ENSG00000096654.11	ZNF184	3122	1023	1033	1008	1146
ENSG00000096696.9	DSP	10093	659	557	21248	21353
ENSG00000096717.7	SIRT1	4551	1500	1551	2055	2061
ENSG00000096746.13	HNRNPH3	5373	10049	10517	13301	13248
ENSG00000096872.11	IFT74	3755	435	542	748	842
ENSG00000097007.13	ABL1	6276	4954	5032	10436	11245
ENSG00000097021.15	ACOT7	4892	10518	10398	4968	5351
ENSG00000097033.10	SH3GLB1	6827	4329	4503	4623	4533
ENSG00000097046.8	CDC7	3599	1265	1378	2742	2512
ENSG00000097096.8	SYDE2	6451	62	54	503	490
ENSG00000099203.2	TMED1	1513	606	696	1726	1907
ENSG00000099219.9	ERMP1	6528	4299	4498	4531	4441
ENSG00000099246.12	RAB18	6106	4988	6112	2439	2249
ENSG00000099251.10	HSD17B7P2	1654	430	353	376	319
ENSG00000099260.6	PALMD	8244	543	518	1013	1030
ENSG00000099282.5	TSPAN15	2646	2902	2854	864	932
ENSG00000099284.9	H2AFY2	1980	1065	1053	1007	1172
ENSG00000099290.11	FAM21A	5162	907	871	900	726
ENSG00000099308.6	MAST3	6772	11441	11247	1631	1768
ENSG00000099326.4	MZF1	6691	3220	2901	2365	2729
ENSG00000099330.4	OCEL1	1867	1150	1227	1237	1286
ENSG00000099331.9	MYO9B	9948	7580	7101	9684	10894
ENSG00000099337.3	KCNK6	3113	72	61	1203	1459
ENSG00000099338.18	CATSPERG	9283	343	307	258	257
ENSG00000099341.7	PSMD8	3105	8903	8088	9921	10657
ENSG00000099365.5	STX1B	5408	24748	24191	360	384
ENSG00000099377.9	HSD3B7	2504	392	400	1525	1752
ENSG00000099381.12	SETD1A	6903	3126	2805	5158	5791
ENSG00000099399.5	MAGEB2	1610	3	0	362	381
ENSG00000099622.9	CIRBP	6890	22651	21917	9463	10480
ENSG00000099624.3	ATP5D	2245	7447	6873	4617	5760
ENSG00000099625.8	C19orf26	4543	1524	1497	386	481
ENSG00000099783.7	HNRNPM	5606	8506	8378	19129	20306
ENSG00000099785.6	2015-03-02	2216	3882	3711	642	879
ENSG00000099795.2	NDUFB7	531	3729	3375	3031	3425
ENSG00000099804.4	CDC34	2172	4349	4083	3647	4501
ENSG00000099812.6	MISP	2872	37	16	1620	1843
ENSG00000099814.11	CEP170B	7199	12733	12104	3993	4406
ENSG00000099817.7	POLR2E	3991	7226	6512	7960	8891
ENSG00000099821.9	POLRMT	5701	4136	3735	4976	5741
ENSG00000099822.2	HCN2	3408	10488	10275	1335	1433
ENSG00000099840.9	IZUMO4	2818	911	929	363	389
ENSG00000099849.10	RASSF7	2492	1352	1358	1324	1690
ENSG00000099860.4	GADD45B	2138	4342	4353	2051	2499
ENSG00000099864.13	PALM	5215	15863	15744	1163	1436
ENSG00000099866.10	MADCAM1	2441	441	403	57	52
ENSG00000099875.10	MKNK2	5275	8119	7687	8674	9625
ENSG00000099889.9	ARVCF	5621	6551	5779	1345	1693
ENSG00000099904.11	ZDHHC8	5542	5004	4444	3903	4643
ENSG00000099917.13	MED15	10374	5320	4958	6384	7310
ENSG00000099937.6	SERPIND1	2553	121	148	4697	4594
ENSG00000099940.7	SNAP29	4953	2384	2206	3196	3484
ENSG00000099942.8	CRKL	5325	11504	11355	11654	12113
ENSG00000099953.5	MMP11	5176	96	103	860	934
ENSG00000099956.13	SMARCB1	2481	4487	4520	5678	5776
ENSG00000099958.10	DERL3	3796	207	210	1866	2077
ENSG00000099960.8	SLC7A4	2447	503	578	14	4
ENSG00000099968.13	BCL2L13	7527	4711	4892	3875	4166
ENSG00000099994.10	SUSD2	5279	275	327	360	418
ENSG00000099995.14	SF3A1	6329	8795	8709	11188	12039
ENSG00000099998.13	GGT5	2590	1325	1182	198	209
ENSG00000100029.13	PES1	4557	2677	2375	6287	7110
ENSG00000100030.10	MAPK1	11336	22627	22919	11000	10820
ENSG00000100033.12	PRODH	8772	5120	4821	1003	1138
ENSG00000100034.9	PPM1F	7318	3398	3149	3735	4501
ENSG00000100036.11	SLC35E4	5531	567	560	434	399
ENSG00000100038.15	TOP3B	6641	1549	1434	3470	3788
ENSG00000100055.16	CYTH4	6157	333	345	297	360
ENSG00000100056.7	DGCR14	6003	1725	1885	1434	1690
ENSG00000100060.13	MFNG	3042	228	223	1584	1592
ENSG00000100065.10	CARD10	5652	206	197	2177	2320
ENSG00000100068.7	LRP5L	4555	135	178	450	479
ENSG00000100075.5	SLC25A1	2089	2349	2024	5716	6374
ENSG00000100078.3	PLA2G3	2697	46	22	163	193
ENSG00000100083.14	GGA1	9370	5549	5125	5854	6519
ENSG00000100095.14	SEZ6L	7152	14852	14842	315	304
ENSG00000100097.7	LGALS1	1099	5722	5548	15797	18398
ENSG00000100099.16	HPS4	10782	5338	5463	4902	5235
ENSG00000100100.8	PIK3IP1	3805	4337	4264	732	748
ENSG00000100104.8	SRRD	4319	2335	2235	1887	1966
ENSG00000100105.13	PATZ1	5693	2790	2574	3143	3380
ENSG00000100109.12	TFIP11	5431	2186	2264	2581	2585
ENSG00000100116.12	GCAT	2102	1465	1348	1446	1428
ENSG00000100129.13	EIF3L	4296	18046	17689	26477	26652
ENSG00000100138.9	NHP2L1	2780	12254	12001	8302	9028
ENSG00000100139.9	MICALL1	5968	1321	1452	2320	2566
ENSG00000100146.12	SOX10	3710	8082	7351	3813	4138
ENSG00000100147.9	CCDC134	1270	220	188	327	346
ENSG00000100151.11	PICK1	4371	4350	4072	1265	1501
ENSG00000100162.10	CENPM	1778	26	14	1277	1454
ENSG00000100167.15	2015-09-03	5427	39629	40325	1545	1667
ENSG00000100191.4	SLC5A4	2028	52	70	145	137
ENSG00000100196.6	KDELR3	1929	84	81	2244	2261
ENSG00000100201.14	DDX17	9998	56868	60565	39567	38651
ENSG00000100206.5	DMC1	3025	77	47	197	162
ENSG00000100207.14	TCF20	7548	3576	3617	4534	4849
ENSG00000100209.5	HSCB	1462	424	410	592	638
ENSG00000100211.6	CBY1	2348	1115	1042	976	1103
ENSG00000100216.4	TOMM22	1583	2631	2624	3807	4114
ENSG00000100219.12	XBP1	3028	2492	2782	18223	18441
ENSG00000100220.7	RTCB	2959	4773	4951	6106	6777
ENSG00000100221.6	JOSD1	4326	6162	6185	5381	5722
ENSG00000100225.13	FBXO7	8523	7118	7115	9230	9752
ENSG00000100227.13	POLDIP3	3650	7249	7208	7145	7372
ENSG00000100228.8	RAB36	4107	835	848	482	466
ENSG00000100234.11	TIMP3	4603	8689	8505	15357	15447
ENSG00000100241.16	SBF1	9442	22659	21847	8121	9087
ENSG00000100258.13	LMF2	3071	3584	3490	5239	6261
ENSG00000100263.9	RHBDD3	3014	1484	1383	1674	1948
ENSG00000100271.12	TTLL1	1877	1137	1153	366	478
ENSG00000100281.9	HMGXB4	6006	1611	1504	3226	3034
ENSG00000100285.9	NEFH	3783	18381	17720	1164	1173
ENSG00000100290.2	BIK	953	1	0	173	197
ENSG00000100292.12	HMOX1	2405	657	571	2032	2277
ENSG00000100294.8	MCAT	2388	1052	994	842	956
ENSG00000100297.11	MCM5	7338	972	902	8422	9450
ENSG00000100299.13	ARSA	2938	2842	2655	1618	1970
ENSG00000100300.13	TSPO	1455	940	779	2898	3794
ENSG00000100302.6	RASD2	3412	4007	3884	460	582
ENSG00000100304.12	TTLL12	4622	3531	3550	5962	6820
ENSG00000100311.12	PDGFB	3761	1413	1295	884	951
ENSG00000100314.3	CABP7	3259	1125	1315	57	75
ENSG00000100319.11	ZMAT5	3315	881	837	696	854
ENSG00000100321.10	SYNGR1	6945	44438	43666	1837	1941
ENSG00000100324.9	TAB1	4456	3437	3351	2098	2437
ENSG00000100325.10	ASCC2	5394	1693	1429	3894	4281
ENSG00000100335.8	MIEF1	7555	3489	3457	5077	5355
ENSG00000100336.13	APOL4	4375	231	293	182	176
ENSG00000100342.16	APOL1	3519	694	591	2871	3073
ENSG00000100346.13	CACNA1I	10849	4236	4342	91	106
ENSG00000100348.5	TXN2	2050	4652	4453	4323	4730
ENSG00000100350.10	FOXRED2	5577	4074	4040	4044	4491
ENSG00000100353.13	EIF3D	4070	5556	5296	16343	17441
ENSG00000100354.16	TNRC6B	19998	3831	4105	2131	2374
ENSG00000100360.10	IFT27	8009	2404	2393	1361	1475
ENSG00000100362.8	PVALB	1050	7977	8068	591	595
ENSG00000100365.10	NCF4	1759	148	150	601	633
ENSG00000100368.9	CSF2RB	5061	85	138	773	898
ENSG00000100376.7	FAM118A	6512	1562	1720	2287	2339
ENSG00000100379.13	KCTD17	2783	3853	3352	704	704
ENSG00000100380.8	ST13	4147	14852	16504	17009	16818
ENSG00000100385.9	IL2RB	4700	20	10	147	176
ENSG00000100395.10	L3MBTL2	6451	3930	3886	2794	2944
ENSG00000100399.11	CHADL	2596	1971	1719	49	55
ENSG00000100401.15	RANGAP1	5463	13426	12700	9559	10418
ENSG00000100403.10	ZC3H7B	10525	16332	16154	8691	9592
ENSG00000100410.3	PHF5A	1235	1104	1090	2152	2377
ENSG00000100412.11	ACO2	4041	23993	23823	8695	9432
ENSG00000100413.12	POLR3H	6577	4666	4762	2855	2983
ENSG00000100416.8	TRMU	8584	2844	2562	3409	3863
ENSG00000100417.7	PMM1	5082	3258	3023	1862	2140
ENSG00000100418.7	DESI1	4972	6799	6248	3749	3965
ENSG00000100422.9	CERK	4938	9307	9137	4916	5129
ENSG00000100425.14	BRD1	5850	3425	3508	2831	2922
ENSG00000100426.6	ZBED4	6893	883	969	2967	3043
ENSG00000100427.11	MLC1	4297	15085	14461	196	274
ENSG00000100433.11	KCNK10	5592	1139	1129	10	7
ENSG00000100439.6	ABHD4	3117	1962	1666	2952	3010
ENSG00000100441.5	KHNYN	7515	3680	3828	6893	7248
ENSG00000100442.6	FKBP3	2262	5891	6585	4901	4604
ENSG00000100445.12	SDR39U1	3099	4873	4541	3335	3439
ENSG00000100448.3	CTSG	1374	1	2	984	1185
ENSG00000100461.13	RBM23	6584	5140	4841	4318	4411
ENSG00000100462.11	PRMT5	3467	3247	3151	8956	9277
ENSG00000100473.11	COCH	3623	675	648	1718	1777
ENSG00000100478.10	AP4S1	4393	920	950	237	223
ENSG00000100479.8	POLE2	2955	46	83	1188	1117
ENSG00000100483.9	VCPKMT	2055	789	871	507	635
ENSG00000100485.7	SOS2	6929	2701	3192	2544	2290
ENSG00000100490.5	CDKL1	5961	584	547	224	214
ENSG00000100504.12	PYGL	4798	775	765	8900	8930
ENSG00000100505.9	TRIM9	8945	17816	18098	780	653
ENSG00000100519.7	PSMC6	7482	4761	5273	6141	6159
ENSG00000100522.4	GNPNAT1	4009	1271	1554	4112	3947
ENSG00000100526.15	CDKN3	1829	176	152	1609	1711
ENSG00000100528.7	CNIH1	1684	2287	2345	3500	3265
ENSG00000100532.7	CGRRF1	4104	1066	1041	469	396
ENSG00000100554.7	ATP6V1D	4251	9036	9217	3295	3390
ENSG00000100558.4	PLEK2	1603	4	9	388	396
ENSG00000100564.4	PIGH	2915	1735	1734	1106	1142
ENSG00000100575.9	TIMM9	1500	1083	1116	2238	2018
ENSG00000100577.14	GSTZ1	8477	725	670	1550	1638
ENSG00000100583.4	SAMD15	2616	104	61	123	99
ENSG00000100592.11	DAAM1	10712	2836	2882	1891	1940
ENSG00000100593.13	ISM2	4145	59	47	1258	1281
ENSG00000100599.11	RIN3	8683	534	530	1157	1202
ENSG00000100600.10	LGMN	3899	3105	3013	13659	14215
ENSG00000100603.9	SNW1	2432	3510	3503	6317	6423
ENSG00000100604.8	CHGA	3102	18042	18057	44	27
ENSG00000100605.12	ITPK1	6783	22776	21308	4141	4557
ENSG00000100612.9	DHRS7	3248	3684	3910	2627	2530
ENSG00000100614.13	PPM1A	11860	7115	8599	3319	3255
ENSG00000100625.8	SIX4	6658	223	155	869	907
ENSG00000100626.12	GALNT16	8235	5499	5294	711	706
ENSG00000100629.12	CEP128	9495	181	196	1100	1101
ENSG00000100632.6	ERH	1438	3753	4000	7667	7915
ENSG00000100647.7	KIAA0247	5830	6109	6304	1863	1989
ENSG00000100650.11	SRSF5	5357	25296	24362	19438	20650
ENSG00000100678.14	SLC8A3	8444	1218	1156	163	167
ENSG00000100711.9	ZFYVE21	8390	5742	5408	2026	2348
ENSG00000100714.11	MTHFD1	5924	3596	3462	13910	14023
ENSG00000100722.14	ZC3H14	6890	3434	3406	6034	5717
ENSG00000100726.10	TELO2	4239	3005	2798	3919	4613
ENSG00000100731.11	PCNX	16715	4875	5233	4769	4691
ENSG00000100764.9	PSMC1	3356	3035	3452	4851	5103
ENSG00000100767.11	PAPLN	7699	952	835	566	543
ENSG00000100784.5	RPS6KA5	5133	1611	1708	549	569
ENSG00000100796.13	SMEK1	5912	3551	4153	5760	5744
ENSG00000100802.10	C14orf93	3250	349	349	814	955
ENSG00000100813.10	ACIN1	9110	10112	9775	17983	18788
ENSG00000100815.8	TRIP11	10372	1996	2369	2781	2616
ENSG00000100823.7	APEX1	1882	5445	5273	13517	13516
ENSG00000100842.8	EFS	3237	3639	3419	1435	1582
ENSG00000100852.8	ARHGAP5	10887	8317	10494	4398	3901
ENSG00000100867.10	DHRS2	7556	63	39	18435	19534
ENSG00000100883.7	SRP54	3899	3153	3152	5718	5795
ENSG00000100884.5	CPNE6	5996	6481	5947	2	10
ENSG00000100889.7	PCK2	4189	475	530	6240	6636
ENSG00000100906.6	NFKBIA	2373	4031	3817	5277	5474
ENSG00000100908.9	EMC9	1582	1251	1204	1033	1203
ENSG00000100911.9	PSME2	3579	2455	2377	8603	9158
ENSG00000100918.8	REC8	3841	2748	2601	437	471
ENSG00000100934.10	SEC23A	9017	4469	4607	8487	8515
ENSG00000100938.13	GMPR2	3622	4168	4074	4388	4548
ENSG00000100941.4	PNN	4201	6711	6355	19197	19118
ENSG00000100949.10	RABGGTA	3545	1859	1738	1614	1780
ENSG00000100968.9	NFATC4	8437	1473	1368	2361	2708
ENSG00000100979.10	PLTP	2402	4210	3817	3292	3826
ENSG00000100982.7	PCIF1	2832	4287	4063	3185	3634
ENSG00000100983.5	GSS	2325	2401	2173	5104	5642
ENSG00000100987.10	VSX1	3825	947	965	1	10
ENSG00000100994.7	PYGB	4474	22012	21024	12947	13949
ENSG00000101000.4	PROCR	1348	242	236	1156	1202
ENSG00000101003.8	GINS1	4190	226	268	2999	3039
ENSG00000101004.10	NINL	6008	2143	1824	2497	2766
ENSG00000101017.9	CD40	2368	417	488	557	583
ENSG00000101019.17	UQCC1	6916	5530	5282	5485	5746
ENSG00000101049.10	SGK2	3465	677	757	118	184
ENSG00000101052.8	IFT52	2542	1179	1158	2071	2247
ENSG00000101057.11	MYBL2	2682	9	20	13410	14108
ENSG00000101082.9	SLA2	2757	22	42	161	148
ENSG00000101098.8	RIMS4	5206	7482	7376	615	651
ENSG00000101104.8	PABPC1L	4984	378	386	5384	6162
ENSG00000101115.8	SALL4	4061	19	46	1303	1458
ENSG00000101126.11	ADNP	7133	7132	7056	12376	11413
ENSG00000101132.5	PFDN4	1975	1039	1227	2492	2388
ENSG00000101134.7	DOK5	2604	736	767	254	199
ENSG00000101138.7	CSTF1	2724	1143	1212	2973	3080
ENSG00000101144.8	BMP7	5418	2450	2405	1550	1809
ENSG00000101146.8	RAE1	5855	2955	2802	5970	6044
ENSG00000101150.13	TPD52L2	4679	8229	8208	12794	13717
ENSG00000101158.8	NELFCD	6298	4762	4604	11869	12616
ENSG00000101160.9	CTSZ	2038	4483	4490	5611	6021
ENSG00000101161.6	PRPF6	3044	8573	8500	10734	11979
ENSG00000101162.3	TUBB1	3496	14	6	379	302
ENSG00000101166.11	SLMO2	2977	1341	1591	5096	5182
ENSG00000101180.11	HRH3	2671	2601	2354	31	36
ENSG00000101181.13	MTG2	5209	2056	1903	2709	3084
ENSG00000101182.10	PSMA7	1750	5491	5467	13784	15325
ENSG00000101187.11	SLCO4A1	4051	2551	2450	4028	4467
ENSG00000101188.4	NTSR1	4237	92	112	312	334
ENSG00000101189.5	MRGBP	1636	915	980	3270	3395
ENSG00000101190.8	TCFL5	3436	2493	2725	2435	2406
ENSG00000101191.12	DIDO1	13281	5963	5933	9947	10430
ENSG00000101193.6	GID8	1791	1720	1769	4390	4589
ENSG00000101194.13	SLC17A9	4480	203	241	3832	4557
ENSG00000101198.10	NKAIN4	2668	1386	1307	170	225
ENSG00000101203.12	COL20A1	10974	872	863	38	41
ENSG00000101204.11	CHRNA4	8732	2138	2025	18	20
ENSG00000101210.6	EEF1A2	1843	51005	47997	13605	15151
ENSG00000101213.5	PTK6	2523	16	15	367	436
ENSG00000101216.6	GMEB2	4707	1711	1686	2160	2515
ENSG00000101220.13	C20orf27	2415	2128	1765	3554	4169
ENSG00000101222.8	SPEF1	1925	489	486	44	39
ENSG00000101224.13	CDC25B	4149	6662	6294	11843	12738
ENSG00000101236.12	RNF24	7668	2779	2863	5075	5371
ENSG00000101246.15	ARFRP1	7610	2909	2879	3031	3256
ENSG00000101247.13	NDUFAF5	4056	1394	1525	1023	1030
ENSG00000101255.6	TRIB3	2948	580	425	8137	9027
ENSG00000101265.11	RASSF2	5759	15294	15612	1435	1492
ENSG00000101266.12	CSNK2A1	5671	6681	7205	12091	12504
ENSG00000101276.10	SLC52A3	3445	532	565	61	58
ENSG00000101282.4	RSPO4	2710	176	111	111	152
ENSG00000101290.9	CDS2	11893	17455	17767	5132	4915
ENSG00000101306.6	MYLK2	2976	87	65	161	164
ENSG00000101310.10	SEC23B	4039	3301	3533	6834	7049
ENSG00000101311.11	FERMT1	5359	218	248	1331	1129
ENSG00000101327.4	PDYN	2648	362	321	10	13
ENSG00000101331.11	CCM2L	2596	346	347	57	40
ENSG00000101333.12	PLCB4	6900	5511	6323	1220	1138
ENSG00000101335.5	MYL9	1199	2975	2744	1075	1127
ENSG00000101336.8	HCK	3092	450	508	348	306
ENSG00000101337.11	TM9SF4	5415	7568	7470	10215	10647
ENSG00000101343.10	CRNKL1	4567	1407	1601	2946	2956
ENSG00000101347.7	SAMHD1	5214	2980	3012	1966	2145
ENSG00000101349.12	PAK7	4929	2963	3024	13	2
ENSG00000101350.6	KIF3B	6103	8558	8655	4999	5253
ENSG00000101363.8	MANBAL	2045	3375	3312	2688	2904
ENSG00000101365.16	IDH3B	2299	6894	6941	6330	6639
ENSG00000101367.8	MAPRE1	2623	3289	3261	12535	12520
ENSG00000101391.16	CDK5RAP1	4567	1962	1829	3276	3253
ENSG00000101400.5	SNTA1	2342	5644	5255	1365	1540
ENSG00000101407.8	TTI1	4122	1684	1679	5335	5371
ENSG00000101412.9	E2F1	2503	755	647	4419	4993
ENSG00000101413.7	RPRD1B	4243	1916	2203	4500	4465
ENSG00000101417.7	PXMP4	1771	334	298	367	450
ENSG00000101421.3	CHMP4B	1646	9866	10155	6974	7262
ENSG00000101438.3	SLC32A1	2574	2060	1989	0	12
ENSG00000101443.13	WFDC2	1382	309	303	214	291
ENSG00000101447.9	FAM83D	2429	181	168	3356	3617
ENSG00000101452.10	DHX35	4930	941	919	1646	1862
ENSG00000101457.8	DNTTIP1	1883	1533	1310	2578	2776
ENSG00000101460.8	MAP1LC3A	1762	8371	8186	314	389
ENSG00000101463.5	SYNDIG1	2847	4477	4301	237	292
ENSG00000101464.6	PIGU	2755	1468	1427	2771	2991
ENSG00000101473.12	ACOT8	4213	2199	2125	1330	1585
ENSG00000101474.7	APMAP	2454	13937	13463	12701	13759
ENSG00000101489.14	CELF4	6532	11726	12084	3	31
ENSG00000101493.6	ZNF516	8719	785	835	1846	2019
ENSG00000101544.4	ADNP2	5893	1718	1753	3495	3397
ENSG00000101557.10	USP14	5987	5480	5743	7709	7201
ENSG00000101605.8	MYOM1	6573	998	997	160	142
ENSG00000101608.8	MYL12A	3245	2554	2517	10827	10998
ENSG00000101638.9	ST8SIA5	4492	1734	1598	64	55
ENSG00000101639.14	CEP192	9897	2047	2133	3861	4001
ENSG00000101654.13	RNMT	6982	4879	5135	5777	5563
ENSG00000101665.4	SMAD7	3692	1695	1722	1172	1284
ENSG00000101670.7	LIPG	5690	424	440	263	198
ENSG00000101751.6	POLI	9472	1435	1562	2103	1923
ENSG00000101811.9	CSTF2	2151	1156	1004	2769	2817
ENSG00000101825.7	MXRA5	9793	131	118	2421	2487
ENSG00000101843.14	PSMD10	2459	3074	3421	2763	3172
ENSG00000101844.13	ATG4A	2927	670	749	840	933
ENSG00000101846.6	STS	6521	3055	3397	3324	3071
ENSG00000101849.11	TBL1X	7006	2238	2159	5113	5138
ENSG00000101850.8	GPR143	2487	237	223	64	102
ENSG00000101856.8	PGRMC1	1911	10503	10833	6190	6556
ENSG00000101871.10	MID1	7569	1574	1607	1424	1433
ENSG00000101882.5	NKAP	3515	891	852	1996	1858
ENSG00000101883.4	RHOXF1	769	132	93	7	2
ENSG00000101888.7	NXT2	3064	198	300	612	645
ENSG00000101901.6	ALG13	6764	1601	1615	2569	2601
ENSG00000101911.8	PRPS2	2758	1613	1860	3071	3055
ENSG00000101928.8	MOSPD1	2675	379	514	1354	1341
ENSG00000101938.10	CHRDL1	4159	2158	2299	659	622
ENSG00000101940.13	WDR13	4210	4832	4562	3061	3284
ENSG00000101945.12	SUV39H1	3368	712	782	2036	2107
ENSG00000101955.10	SRPX	2105	872	753	1888	2005
ENSG00000101958.9	GLRA2	3713	792	686	7	1
ENSG00000101986.8	ABCD1	4233	296	320	2092	2291
ENSG00000101997.8	CCDC22	2516	1371	1152	1612	1888
ENSG00000102001.8	CACNA1F	6928	270	291	67	76
ENSG00000102003.6	SYP	5203	52016	52742	349	384
ENSG00000102007.6	PLP2	1279	648	598	10033	10415
ENSG00000102024.13	PLS3	4138	4575	4793	8724	8046
ENSG00000102032.8	RENBP	2146	418	464	399	508
ENSG00000102034.12	ELF4	4316	187	169	3170	3146
ENSG00000102038.11	SMARCA1	4101	3917	4208	4840	4519
ENSG00000102048.11	ASB9	2363	26	24	523	481
ENSG00000102053.11	ZC3H12B	7256	1241	1398	165	166
ENSG00000102054.13	RBBP7	7392	5927	5741	15326	15246
ENSG00000102057.5	KCND1	5807	1104	935	471	533
ENSG00000102078.11	SLC25A14	3202	1575	1627	698	764
ENSG00000102096.9	PIM2	2761	1701	1661	7648	8421
ENSG00000102098.13	SCML2	4368	133	225	1759	1680
ENSG00000102100.10	SLC35A2	3183	1042	1064	2099	2345
ENSG00000102103.11	PQBP1	1903	3725	3685	4221	4534
ENSG00000102109.7	PCSK1N	1347	13695	11744	589	739
ENSG00000102119.6	EMD	2020	3035	3001	4856	5698
ENSG00000102125.11	TAZ	4825	2617	2560	3052	3308
ENSG00000102144.9	PGK1	5725	27270	27269	79196	82878
ENSG00000102145.9	GATA1	1498	3	0	1143	1315
ENSG00000102158.15	MAGT1	4862	1838	2035	5807	5545
ENSG00000102172.11	SMS	2695	5358	5617	12919	13386
ENSG00000102174.7	PHEX	7132	102	149	134	154
ENSG00000102178.8	UBL4A	2630	3706	3932	3898	4285
ENSG00000102181.15	CD99L2	5732	20599	19819	3671	3761
ENSG00000102189.12	EEA1	10150	1670	1896	2266	1929
ENSG00000102218.5	RP2	3803	297	390	1073	1203
ENSG00000102221.9	PHF16	5134	512	552	1862	1924
ENSG00000102225.11	CDK16	6524	15007	14128	10946	11567
ENSG00000102226.5	USP11	5269	28325	26747	7805	8731
ENSG00000102230.9	PCYT1B	5555	2191	2217	399	374
ENSG00000102241.7	HTATSF1	3136	7767	7844	7890	8143
ENSG00000102265.7	TIMP1	1790	2572	2416	13720	15099
ENSG00000102271.9	KLHL4	5818	1339	1293	221	272
ENSG00000102302.7	FGD1	4275	1293	1290	1825	1857
ENSG00000102312.16	PORCN	3011	1968	1811	984	1224
ENSG00000102317.13	RBM3	3731	3134	3444	10706	11367
ENSG00000102349.10	KLF8	9022	524	615	129	134
ENSG00000102359.5	SRPX2	2368	43	56	326	326
ENSG00000102362.11	SYTL4	7518	629	674	467	536
ENSG00000102383.9	ZDHHC15	6820	509	548	185	136
ENSG00000102384.9	CENPI	4340	49	50	1313	1309
ENSG00000102385.8	DRP2	8187	3204	3022	131	155
ENSG00000102390.6	PBDC1	1201	641	606	1515	1551
ENSG00000102393.5	GLA	2065	746	755	2838	3106
ENSG00000102401.15	ARMCX3	4239	5381	6610	2829	2834
ENSG00000102409.9	BEX4	1328	12684	13658	1604	1750
ENSG00000102452.11	NALCN	8949	4877	5015	450	424
ENSG00000102468.6	HTR2A	5392	1587	1754	29	18
ENSG00000102471.9	NDFIP2	4806	4583	6013	1610	1649
ENSG00000102524.7	TNFSF13B	3059	159	162	346	303
ENSG00000102543.10	CDADC1	3874	1044	1069	492	536
ENSG00000102554.9	KLF5	3889	158	197	1952	1880
ENSG00000102572.10	STK24	6778	5894	5866	8907	9421
ENSG00000102575.6	ACP5	2814	85	75	530	594
ENSG00000102678.6	FGF9	4539	1248	1392	138	96
ENSG00000102699.5	PARP4	6080	1441	1401	6239	6762
ENSG00000102738.6	MRPS31	1963	1161	1113	1630	1495
ENSG00000102743.10	SLC25A15	1837	126	152	815	802
ENSG00000102753.5	KPNA3	4470	2921	3524	3103	3319
ENSG00000102755.6	FLT1	8072	3866	3856	399	466
ENSG00000102760.12	RGCC	1032	5451	5266	128	138
ENSG00000102796.6	DHRS12	3525	589	695	339	372
ENSG00000102802.5	MEDAG	2374	118	123	45	38
ENSG00000102804.10	TSC22D1	7159	41361	43343	10031	10228
ENSG00000102805.9	CLN5	4221	1106	1202	1061	1099
ENSG00000102854.10	MSLN	2560	81	81	746	822
ENSG00000102858.8	MGRN1	8311	9475	8522	4623	5485
ENSG00000102870.4	ZNF629	6079	2669	2640	2880	3194
ENSG00000102871.11	TRADD	2567	532	503	1075	1278
ENSG00000102879.11	CORO1A	4871	3703	3389	6764	7574
ENSG00000102882.7	MAPK3	3669	11917	11128	4064	4703
ENSG00000102886.10	GDPD3	1891	462	463	690	708
ENSG00000102890.10	ELMO3	2575	320	212	656	735
ENSG00000102897.5	LYRM1	3593	1473	1681	1411	1404
ENSG00000102898.7	NUTF2	3895	4445	4396	6432	6926
ENSG00000102900.8	NUP93	5735	2080	2210	7938	8257
ENSG00000102901.8	CENPT	5539	5877	5876	4641	5100
ENSG00000102904.10	TSNAXIP1	3852	517	496	47	70
ENSG00000102910.9	LONP2	9957	7952	8162	7057	7486
ENSG00000102924.7	CBLN1	2594	16566	16444	248	266
ENSG00000102934.5	PLLP	1620	8082	7331	705	769
ENSG00000102967.7	DHODH	4312	368	321	1146	1212
ENSG00000102974.10	CTCF	4301	3995	4471	5936	5855
ENSG00000102977.9	ACD	3218	2499	2157	2499	2750
ENSG00000102981.5	PARD6A	1488	2004	1932	304	255
ENSG00000102996.4	MMP15	4419	1347	1256	3645	3912
ENSG00000103005.7	USB1	7298	2326	2251	3545	3558
ENSG00000103024.3	NME3	1445	2782	2618	1387	1611
ENSG00000103035.6	PSMD7	2740	5574	5902	9919	10239
ENSG00000103037.7	SETD6	4424	1714	1625	1672	1861
ENSG00000103042.4	SLC38A7	6991	1583	1490	1488	1732
ENSG00000103043.10	VAC14	8278	3563	3227	4416	4842
ENSG00000103044.6	HAS3	5289	135	146	689	785
ENSG00000103051.14	COG4	4786	3781	3790	5162	5780
ENSG00000103056.7	SMPD3	7163	1956	2037	339	400
ENSG00000103061.7	SLC7A6OS	5187	1578	1624	2418	2277
ENSG00000103064.9	SLC7A6	7570	2616	2613	5889	5843
ENSG00000103066.8	PLA2G15	4460	1983	1868	2095	2383
ENSG00000103089.4	FA2H	3010	5179	4658	710	770
ENSG00000103091.10	WDR59	7218	3508	3246	5494	6007
ENSG00000103126.10	AXIN1	7487	2475	2664	4047	4339
ENSG00000103145.6	HCFC1R1	1433	4293	3896	2143	2496
ENSG00000103148.11	NPRL3	6605	2987	3075	3786	4233
ENSG00000103152.7	MPG	1661	1854	1754	2778	3129
ENSG00000103154.5	NECAB2	2520	2630	2300	149	135
ENSG00000103160.7	HSDL1	3896	3285	3365	3145	3284
ENSG00000103168.12	TAF1C	5565	3991	3688	6118	7087
ENSG00000103174.7	NAGPA	5484	2449	2172	1231	1372
ENSG00000103175.6	WFDC1	4817	1142	1070	403	475
ENSG00000103187.6	COTL1	6742	4520	4530	9106	10062
ENSG00000103194.11	USP10	5083	4312	4530	7592	7753
ENSG00000103197.12	TSC2	11116	11480	11085	6965	7470
ENSG00000103222.14	ABCC1	7575	1265	1276	10070	10856
ENSG00000103226.13	NOMO3	8271	810	824	836	761
ENSG00000103241.5	FOXF1	2568	289	234	531	540
ENSG00000103245.9	NARFL	8101	2740	2633	1832	1930
ENSG00000103248.13	MTHFSD	5350	677	663	1128	1312
ENSG00000103253.13	HAGHL	4890	1741	1731	1443	1730
ENSG00000103254.5	FAM173A	1923	1564	1307	734	936
ENSG00000103257.4	SLC7A5	4745	8599	8320	36784	40735
ENSG00000103260.4	METRN	3692	4788	4330	1639	1974
ENSG00000103266.6	STUB1	2316	8841	8215	4946	5771
ENSG00000103269.9	RHBDL1	1884	2132	1991	375	451
ENSG00000103274.6	NUBP1	1955	790	737	1911	1990
ENSG00000103275.14	UBE2I	12368	6643	6689	10628	10975
ENSG00000103310.6	ZP2	3451	1550	1653	1	0
ENSG00000103316.6	CRYM	3782	8283	8165	102	108
ENSG00000103319.7	EEF2K	6357	3708	3752	3984	4191
ENSG00000103355.8	PRSS33	2112	0	2	327	406
ENSG00000103356.11	EARS2	5730	2422	2294	4031	4085
ENSG00000103363.10	TCEB2	1128	7373	6895	6502	7463
ENSG00000103365.11	GGA2	8231	6494	6523	10578	10594
ENSG00000103381.7	CPPED1	3221	1141	1183	1742	1724
ENSG00000103415.7	HMOX2	3793	5981	5472	2264	2435
ENSG00000103423.9	DNAJA3	7071	4847	4567	7059	7388
ENSG00000103449.7	SALL1	5660	2168	2139	2170	2226
ENSG00000103460.12	TOX3	5031	252	201	442	449
ENSG00000103489.7	XYLT1	11004	2635	2524	3081	3210
ENSG00000103490.13	PYCARD	1661	260	249	966	1098
ENSG00000103494.8	RPGRIP1L	12857	1000	1043	1059	1045
ENSG00000103496.10	STX4	4078	2513	2575	2652	2940
ENSG00000103502.9	CDIPT	3325	8703	8342	4486	5150
ENSG00000103512.10	NOMO1	5819	6486	6296	8888	9012
ENSG00000103522.11	IL21R	4219	36	40	630	636
ENSG00000103540.12	CCP110	10111	5263	5439	3016	2836
ENSG00000103549.17	RNF40	6523	6234	5970	9078	9830
ENSG00000103550.9	KNOP1	6115	1321	1261	3619	3599
ENSG00000103591.8	AAGAB	3833	2872	3057	5147	4995
ENSG00000103599.15	IQCH	7108	93	98	238	276
ENSG00000103642.7	LACTB	3017	456	542	1025	1062
ENSG00000103647.8	CORO2B	3998	15575	15021	1480	1531
ENSG00000103653.12	CSK	4572	2762	2420	6201	7145
ENSG00000103657.9	HERC1	17053	13168	13133	6835	6797
ENSG00000103671.5	TRIP4	3135	1028	983	2018	1724
ENSG00000103707.5	MTFMT	2437	621	641	1165	1065
ENSG00000103710.6	RASL12	2798	1525	1416	169	183
ENSG00000103740.5	ACSBG1	8230	4372	4324	133	183
ENSG00000103742.7	IGDCC4	7764	699	800	865	822
ENSG00000103811.11	CTSH	5892	2832	2672	4007	4473
ENSG00000103855.13	CD276	5542	931	971	5799	6321
ENSG00000103888.11	KIAA1199	7621	1811	1923	2839	2838
ENSG00000103932.7	RPAP1	7046	2049	2024	3719	4159
ENSG00000103942.8	HOMER2	10067	1423	1583	1116	1212
ENSG00000103966.5	EHD4	5066	658	606	1763	2022
ENSG00000103978.11	TMEM87A	5588	3261	3488	3809	3670
ENSG00000104043.10	ATP8B4	10861	178	251	406	457
ENSG00000104044.11	OCA2	3355	192	188	586	579
ENSG00000104047.10	DTWD1	3960	654	743	1572	1422
ENSG00000104081.9	BMF	5447	335	277	1450	1488
ENSG00000104112.4	SCG3	3310	15645	16534	585	600
ENSG00000104129.5	DNAJC17	2919	643	624	836	762
ENSG00000104133.10	SPG11	11853	2947	3079	4422	4212
ENSG00000104140.6	RHOV	1705	212	224	2192	2509
ENSG00000104142.6	VPS18	4049	2499	2511	1966	2151
ENSG00000104147.4	OIP5	1236	25	9	991	1012
ENSG00000104177.13	MYEF2	9261	3767	4144	2195	2262
ENSG00000104213.8	PDGFRL	2409	113	161	263	308
ENSG00000104219.8	ZDHHC2	6735	2800	3459	1385	1218
ENSG00000104221.8	BRF2	2760	1150	927	1042	1060
ENSG00000104228.8	TRIM35	4269	1537	1475	1497	1522
ENSG00000104231.6	ZFAND1	4214	1927	2217	2070	2086
ENSG00000104267.5	CA2	2123	4873	5282	480	528
ENSG00000104299.10	INTS9	4905	723	817	1640	1690
ENSG00000104312.6	RIPK2	3117	488	508	1429	1500
ENSG00000104313.13	EYA1	5225	143	194	467	476
ENSG00000104320.9	NBN	6156	2371	2458	4166	4056
ENSG00000104321.6	TRPA1	6377	13	11	833	804
ENSG00000104325.2	DECR1	3507	1895	2051	3061	3209
ENSG00000104327.3	CALB1	7138	7486	8321	59	69
ENSG00000104331.4	IMPAD1	7594	7018	7377	7159	6844
ENSG00000104341.12	LAPTM4B	3197	4014	4213	10399	10801
ENSG00000104356.6	POP1	4852	418	388	1355	1472
ENSG00000104365.9	IKBKB	10041	2439	2476	3660	3721
ENSG00000104368.13	PLAT	7133	1481	1526	3662	3756
ENSG00000104369.4	JPH1	4378	2204	2427	514	515
ENSG00000104388.10	RAB2A	5654	8597	9648	3998	3938
ENSG00000104412.3	EMC2	3779	2833	2851	2029	1912
ENSG00000104419.10	NDRG1	9823	25961	25953	26547	28857
ENSG00000104427.7	ZC2HC1A	4181	1404	1730	455	455
ENSG00000104435.9	STMN2	2362	53507	53707	20	7
ENSG00000104442.5	ARMC1	3408	2266	2892	2239	2229
ENSG00000104447.7	TRPS1	11072	893	973	1574	1529
ENSG00000104472.5	CHRAC1	3301	525	607	2656	2670
ENSG00000104497.9	SNX16	4610	529	614	565	444
ENSG00000104518.6	GSDMD	5116	661	572	2255	2833
ENSG00000104522.11	TSTA3	3622	1653	1684	3398	4044
ENSG00000104524.9	PYCRL	3244	854	791	1022	1223
ENSG00000104529.13	EEF1D	9390	9484	9180	22279	24912
ENSG00000104549.7	SQLE	4305	3286	3572	8635	8841
ENSG00000104611.7	SH2D4A	4148	92	128	1650	1554
ENSG00000104613.7	INTS10	6869	4543	4473	5085	5140
ENSG00000104635.9	SLC39A14	6942	4462	4542	11794	11877
ENSG00000104643.5	MTMR9	8795	4245	4419	1317	1371
ENSG00000104679.6	R3HCC1	2630	2537	2301	1607	1933
ENSG00000104687.8	GSR	3232	2867	2968	5680	6042
ENSG00000104689.5	TNFRSF10A	2951	80	87	805	794
ENSG00000104691.10	UBXN8	2750	552	645	835	919
ENSG00000104695.8	PPP2CB	4516	12743	13981	4244	4141
ENSG00000104722.9	NEFM	4377	41345	41355	100	138
ENSG00000104725.9	NEFL	4083	47647	50650	300	267
ENSG00000104728.11	ARHGEF10	10792	3054	2886	3056	3232
ENSG00000104738.12	MCM4	6824	2777	2767	19224	19348
ENSG00000104756.11	KCTD9	4380	1280	1531	3139	3002
ENSG00000104760.12	FGL1	3301	24	56	1973	1962
ENSG00000104763.13	ASAH1	5051	8379	8764	7656	7593
ENSG00000104783.7	KCNN4	3289	96	104	1053	1278
ENSG00000104805.11	NUCB1	3937	11250	11216	13610	15450
ENSG00000104812.10	GYS1	4246	2417	2480	5160	5769
ENSG00000104814.8	MAP4K1	3953	162	150	888	933
ENSG00000104825.12	NFKBIB	2324	1471	1364	1411	1647
ENSG00000104833.6	TUBB4A	3466	113578	105648	641	619
ENSG00000104852.10	SNRNP70	4684	28012	26364	16007	18121
ENSG00000104853.11	CLPTM1	5229	13771	12591	6844	7479
ENSG00000104856.9	RELB	3031	245	273	791	929
ENSG00000104863.7	LIN7B	1753	1063	997	309	302
ENSG00000104870.8	FCGRT	4173	1610	1493	2395	2753
ENSG00000104872.6	PIH1D1	3331	2990	2943	3749	4220
ENSG00000104881.10	PPP1R13L	5032	412	395	1533	2103
ENSG00000104883.3	PEX11G	1466	88	106	78	89
ENSG00000104884.10	ERCC2	6450	1910	1923	3528	3831
ENSG00000104885.13	DOT1L	11431	3120	2765	8194	9402
ENSG00000104888.5	SLC17A7	6013	55713	52935	224	193
ENSG00000104889.4	RNASEH2A	2039	501	388	4347	4897
ENSG00000104894.7	CD37	4161	361	285	877	922
ENSG00000104897.5	SF3A2	3131	3535	3130	7799	8979
ENSG00000104903.4	LYL1	3119	179	228	1007	1124
ENSG00000104904.8	OAZ1	3457	32242	30716	30311	33283
ENSG00000104907.8	TRMT1	3364	2731	2610	4873	5587
ENSG00000104915.10	STX10	1796	1802	1670	2718	3122
ENSG00000104921.10	FCER2	2367	9	2	291	339
ENSG00000104953.14	TLE6	3647	51	42	230	229
ENSG00000104957.9	CCDC130	3307	2355	2153	1950	2323
ENSG00000104964.10	AES	5298	49323	47171	12100	13853
ENSG00000104967.6	NOVA2	8684	5856	5863	150	111
ENSG00000104969.5	SGTA	3801	7964	7304	6691	7524
ENSG00000104973.10	MED25	6116	3348	3352	3364	4104
ENSG00000104976.7	SNAPC2	2000	1499	1260	1408	1610
ENSG00000104980.3	TIMM44	4888	2865	2568	4036	4808
ENSG00000104998.2	IL27RA	2677	380	331	1535	1832
ENSG00000105011.4	ASF1B	2304	12	25	5390	5803
ENSG00000105048.12	TNNT1	2171	233	259	2381	2670
ENSG00000105053.6	VRK3	9796	2096	2085	2520	2473
ENSG00000105058.7	FAM32A	1921	4182	4070	5234	5424
ENSG00000105072.4	C19orf44	4421	559	527	608	633
ENSG00000105088.4	OLFM2	2500	6346	5841	662	658
ENSG00000105122.8	RASAL3	4681	183	183	790	1030
ENSG00000105127.4	AKAP8	4296	2323	2502	3370	3421
ENSG00000105135.11	ILVBL	5615	2958	2866	4761	5432
ENSG00000105137.8	SYDE1	3965	489	537	4873	5510
ENSG00000105143.8	SLC1A6	7646	7038	6944	122	119
ENSG00000105146.8	AURKC	1741	168	177	327	341
ENSG00000105171.5	POP4	6574	1783	1589	1884	1933
ENSG00000105173.9	CCNE1	2568	293	308	1226	1332
ENSG00000105176.13	URI1	4528	3335	3632	4671	4758
ENSG00000105185.7	PDCD5	2253	2939	2950	4120	4319
ENSG00000105193.4	RPS16	2603	13566	12217	45447	49371
ENSG00000105197.6	TIMM50	6908	3598	3483	5268	5857
ENSG00000105202.3	FBL	2173	2605	2566	12674	13697
ENSG00000105204.9	DYRK1B	3192	1889	1710	737	856
ENSG00000105219.4	CNTD2	2039	438	412	63	71
ENSG00000105223.14	PLD3	5184	28199	26075	9949	11386
ENSG00000105227.10	PRX	5767	539	584	457	491
ENSG00000105229.2	PIAS4	3646	2129	2119	1670	1857
ENSG00000105245.5	NUMBL	5037	4740	4350	1645	1750
ENSG00000105246.5	EBI3	1284	121	89	70	111
ENSG00000105248.11	CCDC94	1671	1373	1242	1219	1370
ENSG00000105251.6	SHD	2811	1147	1034	49	87
ENSG00000105254.7	TBCB	3326	9512	8845	3227	3799
ENSG00000105255.6	FSD1	3111	3846	3522	858	836
ENSG00000105258.4	POLR2I	1269	2948	2840	1486	1754
ENSG00000105270.10	CLIP3	3772	46605	45269	1074	1162
ENSG00000105278.6	ZFR2	5944	1376	1145	231	322
ENSG00000105281.8	SLC1A5	3332	390	443	19701	21677
ENSG00000105289.10	TJP3	4259	15	14	538	739
ENSG00000105290.7	APLP1	3656	57030	54016	1020	1132
ENSG00000105298.9	CACTIN	5952	2484	2316	2678	3158
ENSG00000105321.8	CCDC9	3407	1225	1287	1551	1855
ENSG00000105323.12	HNRNPUL1	6537	11379	11332	22862	24535
ENSG00000105325.9	FZR1	5802	5377	5263	2969	3378
ENSG00000105327.11	BBC3	3178	623	648	956	1220
ENSG00000105329.5	TGFB1	3238	1008	871	5565	6550
ENSG00000105339.6	DENND3	14670	3283	3213	2321	2496
ENSG00000105341.14	ATP5SL	4381	2301	2230	2367	2911
ENSG00000105355.4	PLIN3	2813	2385	2471	5420	6289
ENSG00000105357.11	MYH14	9933	5533	5160	2780	3165
ENSG00000105364.9	MRPL4	4070	2951	2778	4429	5201
ENSG00000105366.11	SIGLEC8	3171	249	284	6	25
ENSG00000105371.8	ICAM4	1427	2	0	267	353
ENSG00000105372.2	RPS19	3805	13173	12547	48101	55202
ENSG00000105374.5	NKG7	935	18	31	417	463
ENSG00000105376.4	ICAM5	3906	2971	2903	2020	2399
ENSG00000105383.10	CD33	5975	102	93	1086	1107
ENSG00000105397.9	TYK2	6687	4908	4525	7147	7947
ENSG00000105398.3	SULT2A1	1987	5	1	1340	1291
ENSG00000105402.3	NAPA	5839	17617	16410	4672	5399
ENSG00000105404.6	RABAC1	1999	4520	3950	1693	2076
ENSG00000105409.11	ATP1A3	5069	76245	74346	989	1054
ENSG00000105419.13	MEIS3	5122	3561	3226	1492	1751
ENSG00000105426.10	PTPRS	9460	12740	12135	7640	8705
ENSG00000105429.8	MEGF8	11372	15790	15079	4773	5070
ENSG00000105438.4	KDELR1	2251	3551	3869	11538	12604
ENSG00000105464.3	GRIN2D	5093	539	512	485	621
ENSG00000105472.8	CLEC11A	1468	656	574	790	957
ENSG00000105479.11	CCDC114	4299	100	84	124	142
ENSG00000105483.12	CARD8	12894	1214	1251	1777	1881
ENSG00000105486.9	LIG1	6572	1453	1425	6318	6950
ENSG00000105497.3	ZNF175	4626	1087	1123	920	862
ENSG00000105509.6	HAS1	2241	287	267	44	29
ENSG00000105516.6	DBP	6544	4133	4047	1262	1531
ENSG00000105520.6	DKFZP761J1410	3273	7868	7152	2870	3182
ENSG00000105538.4	RASIP1	4149	747	871	1760	1943
ENSG00000105552.10	BCAT2	4553	1558	1642	2884	3272
ENSG00000105556.6	MIER2	3738	1640	1564	1828	2117
ENSG00000105559.7	PLEKHA4	3851	347	309	1346	1564
ENSG00000105568.13	PPP2R1A	5338	31133	29103	14827	16385
ENSG00000105605.3	CACNG7	2800	9066	8735	509	492
ENSG00000105610.4	KLF1	1592	20	5	780	804
ENSG00000105612.4	DNASE2	2389	1107	1101	3913	4201
ENSG00000105613.5	MAST1	6533	12553	11212	816	896
ENSG00000105617.3	LENG1	1542	503	542	500	518
ENSG00000105618.9	PRPF31	2616	3113	2896	4283	4727
ENSG00000105619.9	TFPT	1240	1768	1731	925	1057
ENSG00000105639.14	JAK3	6813	1143	913	938	1122
ENSG00000105641.3	SLC5A5	3652	160	175	22	15
ENSG00000105643.5	ARRDC2	4637	3316	3237	2071	2179
ENSG00000105649.5	RAB3A	1818	26955	25771	560	643
ENSG00000105650.17	PDE4C	8532	439	351	229	215
ENSG00000105655.14	ISYNA1	3284	1297	1219	5476	6178
ENSG00000105662.11	CRTC1	6826	14930	14321	1737	2068
ENSG00000105664.6	COMP	3100	244	258	49	25
ENSG00000105671.7	DDX49	2774	2214	2187	3306	3883
ENSG00000105675.4	ATP4A	3889	342	368	4	10
ENSG00000105676.9	ARMC6	3495	1903	1883	2954	3427
ENSG00000105677.7	TMEM147	1932	2816	2464	4076	4798
ENSG00000105695.10	MAG	2957	21682	20564	63	61
ENSG00000105696.4	TMEM59L	2626	28185	26386	593	661
[truncated: 9,635 more rows]

## Sheet: RSEM.counts
transcript_id	gene_id	length	HBRR_C4	HBRR_C6	UHRR_C1	UHRR_C2
ENST00000373020.4	ENSG00000000003.10	2206	534.61	540.55	2470.51	2561.79
ENST00000494424.1	ENSG00000000003.10	820	1.88	0	24.67	8.45
ENST00000496771.1	ENSG00000000003.10	1025	13.51	74.45	14.82	11.76
ENST00000371582.4	ENSG00000000419.8	1161	85.14	3.69	131.29	284.44
ENST00000371583.5	ENSG00000000419.8	956	0	0	0	0
ENST00000371584.4	ENSG00000000419.8	1073	13.16	22.35	289.18	261.25
ENST00000371588.5	ENSG00000000419.8	1075	1196.08	1285.74	2908.79	2700.6
ENST00000413082.1	ENSG00000000419.8	672	0	0	21.6	44.94
ENST00000466152.1	ENSG00000000419.8	1097	88.63	75.22	21.14	104.78
ENST00000494752.1	ENSG00000000419.8	789	0	0	0	0
ENST00000367770.1	ENSG00000000457.9	2916	294.5	360.88	422.27	424.45
ENST00000367771.6	ENSG00000000457.9	6364	428.64	324.78	249.05	236.53
ENST00000367772.4	ENSG00000000457.9	3477	0	0	16.93	18.29
ENST00000423670.1	ENSG00000000457.9	2077	31.92	0	74.59	50.52
ENST00000470238.1	ENSG00000000457.9	1538	26.94	51.34	32.16	35.2
ENST00000286031.6	ENSG00000000460.12	4355	11.75	0	296.68	94.92
ENST00000359326.4	ENSG00000000460.12	4002	0.07	0	331.73	362.6
ENST00000413811.2	ENSG00000000460.12	1697	2.82	0	2.78	10.67
ENST00000456684.1	ENSG00000000460.12	1071	0	12.37	86.7	104.93
ENST00000459772.1	ENSG00000000460.12	3727	259.91	260.15	960.75	1128.55
ENST00000466580.2	ENSG00000000460.12	815	0	0	0	0
ENST00000472795.1	ENSG00000000460.12	919	21.08	7.25	0	16.6
ENST00000481744.1	ENSG00000000460.12	755	24.72	3.08	4.89	6.88
ENST00000496973.1	ENSG00000000460.12	782	12.65	12.15	82.27	63.35
ENST00000498289.1	ENSG00000000460.12	3849	0	5	42.19	49.5
ENST00000374003.3	ENSG00000000938.8	2021	0	0	0	0
ENST00000374004.1	ENSG00000000938.8	2350	342.39	272.65	153	10.21
ENST00000374005.3	ENSG00000000938.8	2729	69.26	67.37	21.74	29.14
ENST00000399173.1	ENSG00000000938.8	2483	46	98.35	0	156.41
ENST00000457296.1	ENSG00000000938.8	1104	0	0	0	0
ENST00000468038.1	ENSG00000000938.8	781	0	0	0	0
ENST00000475472.1	ENSG00000000938.8	679	35.04	41.98	2.48	3.24
ENST00000545953.1	ENSG00000000938.8	2242	52.3	19.64	0.78	0
ENST00000359637.2	ENSG00000000971.11	1454	20.96	0	0	0
ENST00000367429.4	ENSG00000000971.11	4127	1478.15	1332.82	740.83	730.22
ENST00000439155.2	ENSG00000000971.11	1822	132.54	236.74	185.85	152.12
ENST00000466229.1	ENSG00000000971.11	6985	67.35	121.41	78.71	84.6
ENST00000470918.1	ENSG00000000971.11	753	0	13.2	7.61	4.07
ENST00000496761.1	ENSG00000000971.11	550	0	2.84	0	0
ENST00000002165.6	ENSG00000001036.9	2356	1236.65	1252.43	6701.71	6798.33
ENST00000367585.1	ENSG00000001036.9	646	12.7	39.9	0	0
ENST00000438118.2	ENSG00000001036.9	1503	7.69	7.84	54.22	54.36
ENST00000451668.1	ENSG00000001036.9	737	34.96	22.83	37.06	57.31
ENST00000341376.6	ENSG00000001167.10	3811	1882.35	2158.65	3213.09	3012.79
ENST00000353205.5	ENSG00000001167.10	1660	73.65	93.35	502.91	656.21
ENST00000003583.8	ENSG00000001460.13	2544	1296.55	910.92	48.5	0
ENST00000337248.4	ENSG00000001460.13	2646	758.55	1025.36	612.92	654.23
ENST00000374409.1	ENSG00000001460.13	2804	0	0	0	0
ENST00000435187.1	ENSG00000001460.13	772	8.26	0	2.73	4.33
ENST00000438866.1	ENSG00000001460.13	811	0	0	12.1	0
ENST00000440416.1	ENSG00000001460.13	2500	0	0	0	34.43
ENST00000468303.1	ENSG00000001460.13	6016	117.51	136.97	15.37	50.8
ENST00000475760.1	ENSG00000001460.13	455	3.63	10.28	0	5.09
ENST00000483261.1	ENSG00000001460.13	625	2.65	0	7.9	0
ENST00000483528.1	ENSG00000001460.13	758	5.73	0	0	0
ENST00000492753.1	ENSG00000001460.13	307	0	0	0	0
ENST00000497384.1	ENSG00000001460.13	1685	10.12	2.48	3.67	10.18
ENST00000498488.1	ENSG00000001460.13	711	0	0	9.8	8.94
ENST00000003912.3	ENSG00000001461.12	5481	16360.6	16071.2	2439.88	2471.07
ENST00000339255.2	ENSG00000001461.12	1676	0	1.55	186.64	153.18
ENST00000358028.4	ENSG00000001461.12	1757	9.76	45.34	7.11	15.43
ENST00000374399.4	ENSG00000001461.12	1711	466.43	436.21	92.99	156.37
ENST00000428131.1	ENSG00000001461.12	681	61.68	41.76	0	0
ENST00000432012.1	ENSG00000001461.12	2714	54.33	55.33	45.34	38.59
ENST00000475663.2	ENSG00000001461.12	694	0	6.43	3.9	1.48
ENST00000488155.1	ENSG00000001461.12	931	4.16	5.2	5.13	2.88
ENST00000312391.8	ENSG00000001497.12	2328	0	0	0	0
ENST00000374804.5	ENSG00000001497.12	2261	0	0	0	36.83
ENST00000374807.5	ENSG00000001497.12	2386	464.88	478.45	3494.37	3989.62
ENST00000374811.3	ENSG00000001497.12	2439	554.65	310.75	1790.54	1689.25
ENST00000469091.1	ENSG00000001497.12	447	211.76	231.01	38.91	48
ENST00000484069.1	ENSG00000001497.12	5205	3709.71	3754.79	647.19	693.3
ENST00000321037.4	ENSG00000001561.6	4651	3028	3663	342	338
ENST00000265742.3	ENSG00000001629.5	6081	3598.88	4123.47	4574.01	4338.01
ENST00000413588.1	ENSG00000001629.5	642	0	0	18.27	40.57
ENST00000422095.1	ENSG00000001629.5	2036	608.45	427.48	648.84	649.6
ENST00000439883.1	ENSG00000001629.5	774	0	0	2.68	8.78
ENST00000442183.1	ENSG00000001629.5	547	0	0	0	22.73
ENST00000465883.1	ENSG00000001629.5	723	5.68	12.05	19.2	22.22
ENST00000486698.1	ENSG00000001629.5	438	0	7	0	6.09
ENST00000309032.3	ENSG00000002330.9	929	3039.07	2740.8	1215.56	1429.8
ENST00000394531.3	ENSG00000002330.9	631	8.65	10.5	0	6.78
ENST00000394532.3	ENSG00000002330.9	1157	267.38	235.06	149.57	157.84
ENST00000492141.1	ENSG00000002330.9	359	4.21	15.79	2.86	7.06
ENST00000493798.1	ENSG00000002330.9	325	2.46	0	0	0
ENST00000544271.1	ENSG00000002330.9	552	139.67	129.85	45.11	68.56
ENST00000544785.1	ENSG00000002330.9	525	5.56	0	6.9	2.95
ENST00000226299.4	ENSG00000002549.8	2213	110.5	100.51	281.68	488.49
ENST00000503467.1	ENSG00000002549.8	1709	81.99	78.42	34.78	27.4
ENST00000504614.1	ENSG00000002549.8	813	0	0	0	0
ENST00000507960.1	ENSG00000002549.8	435	0	0	0	0
ENST00000508014.1	ENSG00000002549.8	494	3.49	5.29	7.12	0
ENST00000508497.1	ENSG00000002549.8	651	5.4	19.23	14.07	12.14
ENST00000509583.1	ENSG00000002549.8	887	23.57	10.12	13.72	3.24
ENST00000512397.1	ENSG00000002549.8	689	51.87	26.16	30.06	15.16
ENST00000513105.1	ENSG00000002549.8	626	0	0	11.7	0
ENST00000606142.1	ENSG00000002549.8	1876	2670.17	2737.27	4251.88	4197.57
ENST00000318008.6	ENSG00000002834.13	4109	7324.06	7286.91	14653	15515.3
ENST00000419929.1	ENSG00000002834.13	762	0	0	0	0
ENST00000433206.2	ENSG00000002834.13	1408	0	2.02	0	0
ENST00000435347.3	ENSG00000002834.13	3492	1033.03	1179.34	1072.07	924.18
ENST00000443937.3	ENSG00000002834.13	1482	0	5.26	1.97	4.45
ENST00000579123.1	ENSG00000002834.13	1874	26.22	44.46	51.31	47.39
ENST00000581485.1	ENSG00000002834.13	617	0	0	0	0
ENST00000584106.1	ENSG00000002834.13	1167	13.68	7.99	38.62	28.69
ENST00000585841.1	ENSG00000002834.13	1408	0	2.02	0	0
ENST00000359238.2	ENSG00000002919.10	2315	1558.34	1508.95	1026.31	1098.42
ENST00000393405.2	ENSG00000002919.10	2733	115.9	178.01	153.43	203.56
ENST00000439357.2	ENSG00000002919.10	1426	0	0	8.62	0
ENST00000452859.2	ENSG00000002919.10	1601	0	0	0	0
ENST00000577310.1	ENSG00000002919.10	358	0	3.15	0	1.13
ENST00000578861.1	ENSG00000002919.10	571	0	0	0	4.16
ENST00000580219.1	ENSG00000002919.10	1200	0	0	96.45	0
ENST00000580875.1	ENSG00000002919.10	704	9.49	12.54	18.24	7.66
ENST00000581298.1	ENSG00000002919.10	563	0	0	0	0
ENST00000581705.1	ENSG00000002919.10	1426	0	0	8.62	0
ENST00000582104.1	ENSG00000002919.10	1282	29.27	27.35	79.34	114.08
ENST00000582481.1	ENSG00000002919.10	627	0	0	0	0
ENST00000583320.1	ENSG00000002919.10	965	0	0	0	0
ENST00000584335.1	ENSG00000002919.10	922	0	0	0	0
ENST00000004103.3	ENSG00000002933.3	1261	479.76	418.42	5.24	0
ENST00000461345.1	ENSG00000002933.3	635	0	9.34	0	0
ENST00000462826.1	ENSG00000002933.3	2065	4.74	14.41	0	0
ENST00000468689.1	ENSG00000002933.3	469	0	0	0	0
ENST00000474166.1	ENSG00000002933.3	534	0	0	0	0
ENST00000475007.1	ENSG00000002933.3	862	0	0	0	0
ENST00000475536.1	ENSG00000002933.3	827	201.01	183.2	0	0
ENST00000475710.1	ENSG00000002933.3	925	0	6.95	0	0
ENST00000481305.1	ENSG00000002933.3	652	17.75	0	0.76	2.25
ENST00000484928.1	ENSG00000002933.3	1530	231.43	237.2	0	7.24
ENST00000494349.1	ENSG00000002933.3	1504	21.3	22.48	0	5.52
ENST00000000412.3	ENSG00000003056.3	2756	2379.96	1828.34	4404.52	4554.29
ENST00000537621.1	ENSG00000003056.3	581	121.21	151.16	299.55	258.7
ENST00000539143.1	ENSG00000003056.3	650	2.39	9.24	10.99	7.19
ENST00000540837.1	ENSG00000003056.3	648	84.7	79.67	407.17	293.31
ENST00000541507.1	ENSG00000003056.3	2198	0	281.43	121.56	35.06
ENST00000543159.1	ENSG00000003056.3	720	25.64	18.5	54.56	71.74
ENST00000543258.1	ENSG00000003056.3	561	14.39	39.42	17.47	40.26
ENST00000543704.1	ENSG00000003056.3	616	443.99	477.46	1107.05	1254.6
ENST00000543834.1	ENSG00000003056.3	412	32.36	75.16	204.49	160.88
ENST00000543845.1	ENSG00000003056.3	596	5.65	0	0	2.78
ENST00000544193.1	ENSG00000003056.3	255	0	0	0	1.01
ENST00000544245.1	ENSG00000003056.3	660	145.71	244.6	438.63	588.17
ENST00000001146.2	ENSG00000003137.4	4732	1091.28	1022.91	54.65	31.53
ENST00000412253.1	ENSG00000003137.4	4025	2774.05	2642.66	180.28	279.35
ENST00000461519.1	ENSG00000003137.4	567	99.13	50.42	30.06	15.12
ENST00000474509.1	ENSG00000003137.4	574	4.53	0	0	0
ENST00000546307.1	ENSG00000003137.4	1346	0	0	0	0
ENST00000002501.6	ENSG00000003249.9	2079	5241.46	4842.47	2135.06	2549.89
ENST00000304733.3	ENSG00000003249.9	2081	0	0	0	0
ENST00000392973.3	ENSG00000003249.9	2689	33.09	25.52	37.6	36.29
ENST00000568330.2	ENSG00000003249.9	567	0	0	0	0
ENST00000568662.1	ENSG00000003249.9	563	20.4	14.48	0	0
ENST00000568838.1	ENSG00000003249.9	993	51.05	73.53	46.33	60.82
ENST00000264276.6	ENSG00000003393.10	6644	10608.6	10569.3	1855.27	2059.14
ENST00000409632.2	ENSG00000003393.10	571	0	0	0	0
ENST00000410052.1	ENSG00000003393.10	559	1.72	0	0	2.15
ENST00000439495.1	ENSG00000003393.10	3242	187.85	216.33	16.6	15.08
ENST00000457679.2	ENSG00000003393.10	3242	187.85	216.33	16.6	15.08
ENST00000462747.1	ENSG00000003393.10	491	0	0	2.72	0
ENST00000467448.1	ENSG00000003393.10	2674	122.77	149.52	195.94	183.01
ENST00000482789.1	ENSG00000003393.10	2981	41.25	107.73	32.49	79.09
ENST00000482891.1	ENSG00000003393.10	4895	192.46	256.79	30.39	11.16
ENST00000483703.1	ENSG00000003393.10	505	0	5.53	0	0
ENST00000489440.1	ENSG00000003393.10	727	91.65	25.63	0	36.27
ENST00000494017.1	ENSG00000003393.10	537	1.89	13.8	0	0
ENST00000496244.1	ENSG00000003393.10	768	0	0	0	0
ENST00000272879.5	ENSG00000003400.10	2073	31.81	2.43	24.29	19.72
ENST00000286186.6	ENSG00000003400.10	5928	156.89	118.59	353.09	409.82
ENST00000313728.7	ENSG00000003400.10	1521	0	0	0	4.72
ENST00000346817.5	ENSG00000003400.10	3926	82.85	103.2	670.18	593.02
ENST00000360132.3	ENSG00000003400.10	5814	44.55	0	118.95	172.78
ENST00000374650.3	ENSG00000003400.10	1126	6.37	5.82	53.13	42.17
ENST00000438843.1	ENSG00000003400.10	888	0	2.96	21.05	9.06
ENST00000448480.1	ENSG00000003400.10	1603	0	0	0	0
ENST00000460140.1	ENSG00000003400.10	1294	4.17	0	0	11.63
ENST00000471191.1	ENSG00000003400.10	430	0	0	0	7.97
ENST00000484926.1	ENSG00000003400.10	703	0	0	0	0
ENST00000485408.1	ENSG00000003400.10	474	0	0	5.31	1.11
ENST00000492363.1	ENSG00000003400.10	1477	14.37	0	0	0
ENST00000233156.3	ENSG00000003436.10	3913	0	0	0	0
ENST00000339091.4	ENSG00000003436.10	1088	14.82	0	0	0
ENST00000392365.1	ENSG00000003436.10	3649	78.07	110.94	1722.2	1687.08
ENST00000409676.1	ENSG00000003436.10	1119	0	0	650.69	714.75
ENST00000417013.1	ENSG00000003436.10	554	0	0	0	0
ENST00000420747.1	ENSG00000003436.10	685	0	0	4.37	8.49
ENST00000421427.1	ENSG00000003436.10	804	0	0	27.72	0
ENST00000426055.1	ENSG00000003436.10	1161	47.18	34.56	1833.92	1644.4
ENST00000435414.1	ENSG00000003436.10	687	0	0	66.57	270.94
ENST00000437725.1	ENSG00000003436.10	545	0	0	5.08	6.94
ENST00000453013.1	ENSG00000003436.10	733	7.66	1.5	92.49	111.93
ENST00000481132.1	ENSG00000003436.10	7690	3.26	0	149.37	66.69
ENST00000481389.1	ENSG00000003436.10	599	0	0	2.6	2.77
ENST00000002125.4	ENSG00000003509.11	2176	630.84	696.71	608.48	829.35
ENST00000336237.6	ENSG00000003509.11	1869	84.21	4.99	74.67	57.63
ENST00000416653.1	ENSG00000003509.11	473	0	0	0	0
ENST00000419278.2	ENSG00000003509.11	680	0	0	0	0
ENST00000431821.1	ENSG00000003509.11	783	0	0	0	26.21
ENST00000432075.1	ENSG00000003509.11	663	0	0	0	0
ENST00000439218.1	ENSG00000003509.11	934	0	0	152.35	28.22
ENST00000441905.1	ENSG00000003509.11	661	15.29	22.26	63.11	59.67
ENST00000455230.1	ENSG00000003509.11	946	19.65	19.85	46.58	39.39
ENST00000469831.1	ENSG00000003509.11	845	21.69	37.53	33.53	127.06
ENST00000474154.1	ENSG00000003509.11	2974	92.9	192.97	135.69	104.54
ENST00000474257.1	ENSG00000003509.11	1470	54.96	46.53	152.58	187.49
ENST00000483999.1	ENSG00000003509.11	711	7.46	11.17	0	3.44
ENST00000180173.5	ENSG00000003987.9	3850	1904.55	2100.92	6.78	26.73
ENST00000398099.3	ENSG00000003987.9	1455	360.99	291.52	10.92	8.33
ENST00000517317.1	ENSG00000003987.9	739	0	0	6	0
ENST00000518272.1	ENSG00000003987.9	562	7.38	4.85	0	1
ENST00000519122.1	ENSG00000003987.9	570	3.68	0	0	0
ENST00000519590.1	ENSG00000003987.9	584	0	0	0	1.94
ENST00000519763.1	ENSG00000003987.9	569	0	0	0	0
ENST00000521177.1	ENSG00000003987.9	506	14.19	7.93	0	0
ENST00000521857.1	ENSG00000003987.9	2158	80.21	119.11	10.31	0
ENST00000523571.1	ENSG00000003987.9	719	0	3.66	0	0
ENST00000004531.10	ENSG00000003989.12	7560	1319.09	1848.88	3878.85	3095.69
ENST00000398090.3	ENSG00000003989.12	7557	153.71	97.4	420.31	107.07
ENST00000470360.1	ENSG00000003989.12	7638	0	0	0	0
ENST00000494857.1	ENSG00000003989.12	7622	560.41	437.14	9976.83	10639.1
ENST00000522656.1	ENSG00000003989.12	2274	15.8	6.58	155.01	426.11
ENST00000003607.4	ENSG00000004142.7	2118	5350.3	5170.2	7050.28	7616.99
ENST00000540200.1	ENSG00000004142.7	2588	1032.7	951.8	994.72	1136.01
ENST00000324093.4	ENSG00000004399.8	7094	2986.58	2830.96	5274.56	5867.22
ENST00000393239.1	ENSG00000004399.8	7101	0	0	0	0
ENST00000501038.2	ENSG00000004399.8	1633	81.58	182.61	52.46	25.84
ENST00000503166.1	ENSG00000004399.8	626	21.45	7.55	2.51	14.71
ENST00000504524.1	ENSG00000004399.8	1701	606.44	609.19	701.29	619.26
ENST00000504689.1	ENSG00000004399.8	546	9.66	0	9.95	5.51
ENST00000504767.1	ENSG00000004399.8	654	48.67	30.44	74.79	130.39
ENST00000504979.1	ENSG00000004399.8	591	24.83	46.64	33.38	41.14
ENST00000505237.2	ENSG00000004399.8	507	0	0	9.01	2.78
ENST00000505505.1	ENSG00000004399.8	559	0	0	10.82	18.83
ENST00000505665.1	ENSG00000004399.8	477	0	0	0	0
ENST00000506979.1	ENSG00000004399.8	691	248.03	301.98	376.8	466.78
ENST00000508630.1	ENSG00000004399.8	563	12.09	41.26	5.3	17.13
ENST00000511018.1	ENSG00000004399.8	601	0	23.33	0	30.73
ENST00000512744.1	ENSG00000004399.8	2662	653.03	711.42	1067.64	1010.11
ENST00000512807.1	ENSG00000004399.8	704	51.57	35.72	82.77	115.29
ENST00000514990.1	ENSG00000004399.8	1084	78.06	100.9	175.05	144.33
ENST00000515191.1	ENSG00000004399.8	602	0	0	3.69	4.96
ENST00000354858.6	ENSG00000004455.12	1021	828.98	822.41	4068.96	3581.29
ENST00000373449.2	ENSG00000004455.12	3586	1683.96	1597.33	9133.38	9460.97
ENST00000466029.1	ENSG00000004455.12	223	0	0	0	0
ENST00000467905.1	ENSG00000004455.12	880	0	0	147.94	430.78
ENST00000469238.1	ENSG00000004455.12	423	17	16.95	33.24	19.91
ENST00000480134.1	ENSG00000004455.12	811	94.73	65.95	469.95	638.5
ENST00000482191.1	ENSG00000004455.12	599	116.02	80.08	156.75	136.68
ENST00000487289.1	ENSG00000004455.12	920	1.28	0	15.21	59.79
ENST00000491241.1	ENSG00000004455.12	596	49.1	88.13	60.01	96.81
ENST00000548033.1	ENSG00000004455.12	936	0	22.04	977.63	933.04
ENST00000548559.1	ENSG00000004455.12	530	0	0	0	0
ENST00000550338.1	ENSG00000004455.12	886	385.92	363.1	227.48	243.38
ENST00000551979.1	ENSG00000004455.12	581	0	0	1.44	12.85
ENST00000226279.3	ENSG00000004468.8	5668	354.75	309.32	1617.36	1791.96
ENST00000502843.1	ENSG00000004468.8	1560	14.97	15.72	158.27	205.82
ENST00000506191.1	ENSG00000004468.8	594	0	0	10.23	6.58
ENST00000510674.1	ENSG00000004468.8	455	0	1.72	27.13	15.08
ENST00000511430.1	ENSG00000004468.8	1672	4.28	6.24	135	107.56
ENST00000001008.4	ENSG00000004478.5	2267	14718.9	14582.6	19411.9	20605.8
ENST00000538622.1	ENSG00000004478.5	572	80.59	82.52	56.01	51.03
ENST00000539181.1	ENSG00000004478.5	370	1.14	0	5.87	2.28
ENST00000540260.1	ENSG00000004478.5	777	106	136	56	65.88
ENST00000543037.1	ENSG00000004478.5	727	93.42	134.9	113.23	85.7
ENST00000543769.1	ENSG00000004478.5	425	0	0	0	1.26
ENST00000544366.1	ENSG00000004478.5	287	5	5	7	17
ENST00000158166.5	ENSG00000004660.10	2459	186.72	266.83	57.99	56.5
ENST00000348335.2	ENSG00000004660.10	3563	5221.13	5409.79	380.47	856.76
ENST00000381769.2	ENSG00000004660.10	3508	4945.22	4470.15	493.74	146.37
ENST00000381771.2	ENSG00000004660.10	3660	498.67	746.67	92.15	112.19
ENST00000573483.1	ENSG00000004660.10	3898	73.25	61.55	14.66	35.18
ENST00000314748.6	ENSG00000004700.11	1054	11.85	21.49	28.73	60.07
ENST00000396093.3	ENSG00000004700.11	932	0	9.94	22.8	60.94
ENST00000421138.2	ENSG00000004700.11	2572	109.34	131.47	1487.36	1016.72
ENST00000444129.2	ENSG00000004700.11	3702	932.38	940.26	3142.05	3148.49
ENST00000536240.1	ENSG00000004700.11	565	7.62	0.16	29.28	46.03
ENST00000536964.1	ENSG00000004700.11	578	4.81	5.67	43.13	52.75
ENST00000539672.1	ENSG00000004700.11	579	0	0	6.65	0
ENST00000542432.1	ENSG00000004700.11	600	0	0	0	0
ENST00000251739.5	ENSG00000004766.11	1193	0	0	0	21.11
ENST00000305866.5	ENSG00000004766.11	3613	1997.47	2140.22	1323.82	1045.16
ENST00000317751.6	ENSG00000004766.11	2134	0	0	71.95	55.01
ENST00000436177.1	ENSG00000004766.11	603	0	0	0	4.27
ENST00000438395.1	ENSG00000004766.11	538	0	0	0	0
ENST00000441602.1	ENSG00000004766.11	3474	0	0	0	0
ENST00000443443.1	ENSG00000004766.11	554	6.97	12.14	0	0
ENST00000458530.1	ENSG00000004766.11	667	9.14	5.42	0	3
ENST00000458707.1	ENSG00000004766.11	1898	63.25	18.78	70.23	73.57
ENST00000467326.1	ENSG00000004766.11	574	0	0	0	2.8
ENST00000471188.1	ENSG00000004766.11	3254	43.08	47.36	28.28	26.94
ENST00000474412.1	ENSG00000004766.11	819	71.02	4.73	0	24.98
ENST00000476413.1	ENSG00000004766.11	381	0	0	0	7.82
ENST00000477572.1	ENSG00000004766.11	504	0	0	0	0
ENST00000477935.1	ENSG00000004766.11	760	0	0	7.28	0
ENST00000480943.1	ENSG00000004766.11	801	0	13.42	1.93	0
ENST00000484954.1	ENSG00000004766.11	594	0	0	0	0
ENST00000485140.1	ENSG00000004766.11	558	0	0	4.63	0
ENST00000485994.1	ENSG00000004766.11	573	7.93	0	0.67	0
ENST00000495039.1	ENSG00000004766.11	1115	0	0	4.2	4.27
ENST00000535481.1	ENSG00000004766.11	2485	339.81	693.94	0	42.07
ENST00000541136.1	ENSG00000004766.11	3474	0	0	0	0
ENST00000544910.1	ENSG00000004766.11	3614	89.33	0	0	0
ENST00000004982.3	ENSG00000004776.7	1457	1787.42	1604.71	1919.19	2183.14
ENST00000587965.1	ENSG00000004776.7	711	0	0	0	5.46
ENST00000592984.1	ENSG00000004776.7	1634	16.58	58.29	74.81	66.4
ENST00000007510.4	ENSG00000004777.14	4401	2194.53	908.37	981.55	992.91
ENST00000221905.1	ENSG00000004777.14	741	16.78	2.7	17.35	3.07
ENST00000314737.5	ENSG00000004777.14	3858	265.53	1086.57	124.24	282.12
ENST00000378944.5	ENSG00000004777.14	4219	1534.06	1543.36	458.01	591.87
ENST00000586918.1	ENSG00000004777.14	206	5.25	0	15.52	6.46
ENST00000587447.3	ENSG00000004777.14	2983	1336.39	1409.04	384.68	331.96
ENST00000587984.1	ENSG00000004777.14	613	18.74	9.46	0	2.17
ENST00000588248.2	ENSG00000004777.14	2004	0	0	14.18	3.72
ENST00000589133.1	ENSG00000004777.14	635	8.28	3.47	0	0
ENST00000590893.1	ENSG00000004777.14	528	0	0	0	0
ENST00000591438.1	ENSG00000004777.14	425	70.29	41.25	21.04	17.21
ENST00000593034.1	ENSG00000004777.14	682	62.3	74.71	26.54	35.05
ENST00000601474.1	ENSG00000004777.14	641	52.87	54.07	25.9	30.46
ENST00000007516.3	ENSG00000004779.5	717	5006.12	4803.88	5597.67	5955.83
ENST00000484769.1	ENSG00000004779.5	843	49.52	29.35	48.01	4.59
ENST00000562133.1	ENSG00000004779.5	503	9.7	5.93	6.04	12.71
ENST00000567761.1	ENSG00000004779.5	520	0	9.17	12.58	16.66
ENST00000570319.1	ENSG00000004779.5	885	13.66	8.66	15.7	19.21
ENST00000005178.5	ENSG00000004799.7	3576	3729.29	4103.66	2549.86	2430.33
ENST00000468445.1	ENSG00000004799.7	572	18.49	7.22	5.05	16.74
ENST00000473301.1	ENSG00000004799.7	691	0	1.31	5.94	4.9
ENST00000473796.1	ENSG00000004799.7	2136	0	44.02	0	0
ENST00000498190.1	ENSG00000004799.7	420	3.22	6.79	1.15	8.04
ENST00000231749.3	ENSG00000004838.9	2896	88.21	58.49	13.36	42.92
ENST00000360165.3	ENSG00000004838.9	1757	18.79	0	40.02	36.84
ENST00000431869.1	ENSG00000004838.9	562	0	0.76	0	0
ENST00000442887.1	ENSG00000004838.9	1072	33.61	45.92	22.67	26.59
ENST00000443080.1	ENSG00000004838.9	707	0	0	3.26	0
ENST00000468182.1	ENSG00000004838.9	423	0	0	0	0
ENST00000475688.1	ENSG00000004838.9	1773	30.58	37.24	27.63	38.4
ENST00000478269.1	ENSG00000004838.9	633	5.81	21.78	0	4.76
ENST00000490675.1	ENSG00000004838.9	676	18	37.81	5.07	0.48
ENST00000258738.6	ENSG00000004846.12	2906	0	0	7.56	6.78
ENST00000404938.2	ENSG00000004846.12	5811	0	5	7.53	9.55
ENST00000406935.1	ENSG00000004846.12	1483	0	0	49.91	33.06
ENST00000441315.1	ENSG00000004846.12	2204	0	0	0	0
ENST00000443026.2	ENSG00000004846.12	2247	0	0	71.91	69.48
ENST00000477094.1	ENSG00000004846.12	673	0	0	12.09	6.13
ENST00000379044.4	ENSG00000004848.6	2876	597	564	13	6
ENST00000321143.4	ENSG00000004961.10	2277	800.72	982.7	546.43	619.96
ENST00000380762.4	ENSG00000004961.10	1072	485.28	445.3	1212.83	1463.04
ENST00000380763.3	ENSG00000004961.10	1000	0	0	201.73	0
ENST00000005340.5	ENSG00000004975.7	3018	1988.41	1868.8	3375.04	3815.36
ENST00000571745.1	ENSG00000004975.7	560	17.35	9.67	2.79	7.1
ENST00000572285.1	ENSG00000004975.7	1240	56	80.29	35.76	37.43
ENST00000573354.1	ENSG00000004975.7	392	10.79	0	0	0
ENST00000574143.1	ENSG00000004975.7	992	0	51.88	0	0
ENST00000574591.1	ENSG00000004975.7	615	2.64	12.99	0	6.04
ENST00000574642.1	ENSG00000004975.7	664	0	8.25	2.01	9.68
ENST00000575086.1	ENSG00000004975.7	900	4.57	0	0	35.88
ENST00000575458.1	ENSG00000004975.7	2659	0	0	62.81	0
ENST00000575756.1	ENSG00000004975.7	1136	58.97	67.21	200.08	293.47
ENST00000576285.1	ENSG00000004975.7	701	18.53	24.66	21.05	12.81
ENST00000576439.1	ENSG00000004975.7	579	9.73	3.13	27.76	21.31
ENST00000576840.1	ENSG00000004975.7	941	205.22	195.79	105.64	100.44
ENST00000576949.1	ENSG00000004975.7	995	126.22	88.7	13.83	18.07
ENST00000577154.1	ENSG00000004975.7	541	19.56	35.62	16.23	14.43
ENST00000161006.3	ENSG00000005001.5	1386	37.28	73.79	74.65	48.26
ENST00000570950.1	ENSG00000005001.5	785	4.51	1.29	59.3	47.51
ENST00000571228.1	ENSG00000005001.5	1037	0	0	0	0
ENST00000572061.1	ENSG00000005001.5	553	0	8.91	0	0
ENST00000574768.1	ENSG00000005001.5	509	0	0	6.3	19.67
ENST00000575164.1	ENSG00000005001.5	1157	0	0	39.99	88.59
ENST00000576381.1	ENSG00000005001.5	850	10.81	0	29.56	31.71
ENST00000577177.1	ENSG00000005001.5	405	3.4	0	5.21	1.26
ENST00000262803.5	ENSG00000005007.8	5348	7439.61	7786.27	7885.6	8392.35
ENST00000594243.1	ENSG00000005007.8	683	11.85	16.11	10.12	9.8
ENST00000594504.1	ENSG00000005007.8	559	0	0	0	0
ENST00000596842.1	ENSG00000005007.8	3825	405.7	630.19	510.18	319.01
ENST00000598209.1	ENSG00000005007.8	551	0	0	0	0
ENST00000598471.1	ENSG00000005007.8	582	2.99	0	0	0
ENST00000599848.1	ENSG00000005007.8	5311	3036.48	2214.78	2237.54	2583.42
ENST00000600012.1	ENSG00000005007.8	501	11.9	4.37	0	1.53
ENST00000600310.1	ENSG00000005007.8	750	0	0	0	1.58
ENST00000600689.1	ENSG00000005007.8	3084	70.57	105.23	36.7	31.78
ENST00000600868.1	ENSG00000005007.8	580	0	0	0	0
ENST00000601689.1	ENSG00000005007.8	561	8.89	13.04	2.85	33.54
ENST00000601981.1	ENSG00000005007.8	556	0	0	0	0
ENST00000317881.8	ENSG00000005022.5	1274	10462.3	10925.2	27375.3	28179.1
ENST00000460013.1	ENSG00000005022.5	775	229.3	293.3	0	0
ENST00000463551.1	ENSG00000005022.5	433	29.33	60.62	63.74	80.03
ENST00000475354.1	ENSG00000005022.5	483	17.09	7.84	19.93	56.89
ENST00000006015.3	ENSG00000005073.5	2295	4	4	347.31	396.84
ENST00000517402.1	ENSG00000005073.5	2137	0	0	156.69	107.16
ENST00000292614.5	ENSG00000005075.11	932	1290	1192.47	2323.33	2462.53
ENST00000393794.3	ENSG00000005075.11	609	0	41.53	40.67	35.47
ENST00000318579.4	ENSG00000005102.8	2707	0	0	0	43.16
ENST00000329168.3	ENSG00000005102.8	2129	0	0	81.17	55.84
ENST00000393661.2	ENSG00000005102.8	1206	0	0	30.83	0
ENST00000549132.1	ENSG00000005102.8	1152	0	0	0	0
ENST00000262327.5	ENSG00000005156.7	3055	32.37	36.34	140.94	120.2
ENST00000378526.4	ENSG00000005156.7	3721	1294.94	1387.34	2816.3	3135.43
ENST00000585370.1	ENSG00000005156.7	235	0	0	5.78	0
ENST00000585740.1	ENSG00000005156.7	887	0	0	0	15.05
ENST00000585941.1	ENSG00000005156.7	1699	0	0	0	20.7
ENST00000586058.1	ENSG00000005156.7	581	16.32	0	43.88	9.13
ENST00000586119.1	ENSG00000005156.7	565	24.1	26.06	36.29	75.83
ENST00000586407.1	ENSG00000005156.7	815	4.54	0	0	6.58
ENST00000586435.1	ENSG00000005156.7	588	4.98	0	7.46	5.59
ENST00000588109.1	ENSG00000005156.7	592	0	0	0	2.85
ENST00000588713.1	ENSG00000005156.7	467	11.14	15.36	8.18	11.16
ENST00000590181.1	ENSG00000005156.7	1156	12.76	26.51	0	23.13
ENST00000590630.1	ENSG00000005156.7	904	0	0	26.16	0
ENST00000592244.1	ENSG00000005156.7	440	0	0	0	0
ENST00000592690.1	ENSG00000005156.7	722	0	3.39	0	14.87
ENST00000593099.1	ENSG00000005156.7	4664	176.86	129	130.01	142.47
ENST00000005386.3	ENSG00000005175.5	2332	885.79	881.59	1763.84	1732
ENST00000380650.4	ENSG00000005175.5	2149	99.03	163.1	528.48	511.02
ENST00000432584.3	ENSG00000005175.5	2133	225.13	179.28	0	0
ENST00000547706.1	ENSG00000005175.5	420	4.95	10.36	26.37	25.64
ENST00000548211.1	ENSG00000005175.5	555	0	1.1	7.27	9.71
ENST00000548296.1	ENSG00000005175.5	567	0	0	5.05	0
ENST00000551293.1	ENSG00000005175.5	621	8.1	1.58	0	1.62
ENST00000261377.6	ENSG00000005189.15	2719	207.98	126.97	788.94	531
ENST00000348433.6	ENSG00000005189.15	2604	0	31.64	130.15	261.78
ENST00000561474.1	ENSG00000005189.15	617	0	0.32	23.03	0
ENST00000563045.1	ENSG00000005189.15	516	1.6	1.21	8	5.69
ENST00000563068.1	ENSG00000005189.15	563	7.92	2.73	15.55	3.07
ENST00000563617.1	ENSG00000005189.15	813	0	0	0	0
ENST00000564200.1	ENSG00000005189.15	715	0	0.7	0	0
ENST00000564274.1	ENSG00000005189.15	2447	88.4	82.91	0	37.8
ENST00000565340.1	ENSG00000005189.15	720	0	2.54	0	0
ENST00000566276.1	ENSG00000005189.15	924	0	0	0	0
ENST00000566518.1	ENSG00000005189.15	993	0	0	0	10.72
ENST00000566993.1	ENSG00000005189.15	2549	0	0	331.82	202.01
ENST00000567297.1	ENSG00000005189.15	753	0	0	0	8.53
ENST00000568046.1	ENSG00000005189.15	586	5.15	0	13.38	8.93
ENST00000568334.1	ENSG00000005189.15	743	4.95	0	1.29	5.94
ENST00000568476.1	ENSG00000005189.15	574	0	0	5.86	4.06
ENST00000568501.1	ENSG00000005189.15	624	0	0	0	0
ENST00000568647.1	ENSG00000005189.15	566	0	0	0	3.45
ENST00000568894.1	ENSG00000005189.15	580	0	0	0	0
ENST00000394391.4	ENSG00000005194.10	2182	1169.08	1399.44	1612.81	1746.85
ENST00000563341.1	ENSG00000005194.10	505	0	0	0	0
ENST00000563561.1	ENSG00000005194.10	597	13.32	8.94	27.32	21.51
ENST00000564885.1	ENSG00000005194.10	493	17.99	32.58	8.98	19.94
ENST00000565368.1	ENSG00000005194.10	851	33.2	36.72	23.54	37.68
ENST00000565786.1	ENSG00000005194.10	641	7	18.27	80.6	94.64
ENST00000565961.1	ENSG00000005194.10	1814	0	0	0	0
ENST00000566284.1	ENSG00000005194.10	1165	42.06	19.94	49.57	63.86
ENST00000567518.1	ENSG00000005194.10	2016	1019.79	498.84	1295.7	1176.32
ENST00000567751.1	ENSG00000005194.10	328	0	0	0	0
ENST00000568940.1	ENSG00000005194.10	1137	0	0	0	0
ENST00000569246.1	ENSG00000005194.10	910	38.53	31.48	36.24	45.38
ENST00000569370.1	ENSG00000005194.10	1559	756.02	752.84	939.24	942.92
ENST00000569979.1	ENSG00000005194.10	896	0	25.95	0	6.89
ENST00000570000.1	ENSG00000005194.10	994	0	0	0	0
ENST00000322813.5	ENSG00000005238.15	3028	83.49	282.11	263.53	213.68
ENST00000378554.2	ENSG00000005238.15	2209	41.99	19.33	133.5	61.97
ENST00000378557.1	ENSG00000005238.15	3070	766.82	926.46	271.83	309.71
ENST00000378561.1	ENSG00000005238.15	5771	121.25	132.18	54.3	42.95
ENST00000378566.1	ENSG00000005238.15	2566	541.36	465.27	149.45	204.97
ENST00000488109.2	ENSG00000005238.15	2999	1068.28	711.66	0	230.73
ENST00000603301.1	ENSG00000005238.15	3256	118.56	0	0	25.99
ENST00000605104.1	ENSG00000005238.15	561	0	0	0	0
ENST00000605244.1	ENSG00000005238.15	3016	0	174.99	90.67	0
ENST00000605392.1	ENSG00000005238.15	585	2.24	9	26.71	4.99
ENST00000265717.4	ENSG00000005249.8	3745	3505.09	4053.68	1335.64	1244.32
ENST00000393613.2	ENSG00000005249.8	642	12.91	7.32	0	0
ENST00000488792.1	ENSG00000005249.8	609	0	0	1.36	27.68
ENST00000312196.4	ENSG00000005302.13	2343	1137.03	1450.16	287.4	348.72
ENST00000337339.2	ENSG00000005302.13	3446	333.17	328.35	664.13	720.61
ENST00000361672.2	ENSG00000005302.13	1608	0	92.07	0	0
ENST00000380691.2	ENSG00000005302.13	589	8.27	0	0	0
ENST00000380692.2	ENSG00000005302.13	1071	56.73	10.03	38.45	24.98
ENST00000380693.3	ENSG00000005302.13	2377	138.47	274.5	430.21	181.39
ENST00000398527.2	ENSG00000005302.13	2005	493.13	0	302.04	472.04
ENST00000421368.2	ENSG00000005302.13	795	0	0	10.95	0
ENST00000467141.1	ENSG00000005302.13	599	9.77	26.63	48.39	34.67
ENST00000468149.1	ENSG00000005302.13	1646	39.22	31.8	0	41.82
ENST00000473380.1	ENSG00000005302.13	433	21.77	10.93	22.35	17.74
ENST00000473806.1	ENSG00000005302.13	452	0	0	0	0
ENST00000476743.1	ENSG00000005302.13	560	0	0	0	0
ENST00000478462.1	ENSG00000005302.13	549	35.07	16.91	0	23.27
ENST00000482871.1	ENSG00000005302.13	834	0	9.53	0	8
ENST00000483645.1	ENSG00000005302.13	549	0	1.4	0	1.94
ENST00000494268.1	ENSG00000005302.13	1124	96.39	45.69	136.07	114.83
ENST00000262367.5	ENSG00000005339.8	10803	6051.4	6774.95	2851.9	2877.54
ENST00000382070.3	ENSG00000005339.8	7598	2109.46	954.26	3514.19	3831.67
ENST00000570939.1	ENSG00000005339.8	864	20.15	0	0	0
ENST00000571763.1	ENSG00000005339.8	548	7.68	37.02	49.12	32.99
ENST00000571826.1	ENSG00000005339.8	627	2.43	0	0	0
ENST00000572134.1	ENSG00000005339.8	846	0	0	42.6	44.13
ENST00000572569.1	ENSG00000005339.8	553	0	4.08	8.85	1.29
ENST00000573517.1	ENSG00000005339.8	716	27.47	0	46.02	14.45
ENST00000573672.1	ENSG00000005339.8	922	0	1.85	4.5	2.34
ENST00000574740.1	ENSG00000005339.8	523	10.3	12.83	6.28	9.15
ENST00000575237.1	ENSG00000005339.8	369	0	0	16.89	4.8
ENST00000576720.1	ENSG00000005339.8	3578	34.1	51.01	17.67	24.63
ENST00000268893.6	ENSG00000005379.11	7483	4937.14	4624.53	164.83	274.28
ENST00000343736.4	ENSG00000005379.11	5947	2097.49	2609.45	212.32	51.44
ENST00000355701.3	ENSG00000005379.11	7626	1370.34	945.62	32.7	148.2
ENST00000577871.1	ENSG00000005379.11	746	0	0	0	1.29
ENST00000578486.1	ENSG00000005379.11	471	24.36	61.01	1.31	11
ENST00000578511.1	ENSG00000005379.11	1504	442.23	477.84	45.58	40.03
ENST00000580669.1	ENSG00000005379.11	809	245.94	297.94	19.57	19.01
ENST00000581675.1	ENSG00000005379.11	1553	2130.34	2123.15	132.14	93.42
ENST00000581692.1	ENSG00000005379.11	4158	444.58	535.26	56.13	94.31
ENST00000582679.1	ENSG00000005379.11	887	0	54.44	27.42	27.72
ENST00000583624.1	ENSG00000005379.11	409	45.57	48.33	13	8.31
ENST00000585149.1	ENSG00000005379.11	381	0	3.42	0	0
ENST00000225275.3	ENSG00000005381.6	3215	114	123.98	2	10
ENST00000340482.3	ENSG00000005381.6	3311	0	0	0	0
ENST00000577220.1	ENSG00000005381.6	260	0	5.02	0	0
ENST00000578493.1	ENSG00000005381.6	483	0	0	0	0
ENST00000580005.1	ENSG00000005381.6	398	0	0	0	0
ENST00000581022.1	ENSG00000005381.6	481	0	0	0	0
ENST00000321027.3	ENSG00000005436.9	4440	158.86	0	427.73	269.6
ENST00000409857.3	ENSG00000005436.9	2516	0	0	59	72.97
ENST00000427862.1	ENSG00000005436.9	632	30.84	25.32	0	76.09
ENST00000442309.1	ENSG00000005436.9	642	0	8.11	56.02	35.51
ENST00000470197.1	ENSG00000005436.9	3648	188.71	263.46	17.33	89.85
ENST00000470285.1	ENSG00000005436.9	423	0	1.21	0	0
ENST00000470503.1	ENSG00000005436.9	1066	90.15	126.79	93.12	157.77
ENST00000472230.1	ENSG00000005436.9	2265	64.62	130.5	734.11	641.22
ENST00000486016.1	ENSG00000005436.9	595	1	0	1.93	0
ENST00000492826.1	ENSG00000005436.9	443	5.82	9.6	16.76	41.99
ENST00000541687.1	ENSG00000005436.9	4250	0	0	0	0
ENST00000348227.4	ENSG00000005448.12	1147	652.29	655.76	1490.97	1699.07
ENST00000409791.1	ENSG00000005448.12	854	61.97	46.1	190.75	244.9
ENST00000426787.1	ENSG00000005448.12	576	9.22	11.34	19.15	14.7
ENST00000461531.1	ENSG00000005448.12	901	2.23	6.02	10.55	5.55
ENST00000465134.1	ENSG00000005448.12	1862	125.64	103.44	166.56	165.87
ENST00000468778.1	ENSG00000005448.12	2356	126.14	108.45	115.6	65.63
ENST00000469321.1	ENSG00000005448.12	864	92.4	26.93	51.88	30.94
ENST00000469932.1	ENSG00000005448.12	552	0	15.53	5.33	12.12
ENST00000475328.1	ENSG00000005448.12	545	0	0	0	15.67
ENST00000480089.1	ENSG00000005448.12	1046	5.56	0	64.09	18.18
ENST00000482605.1	ENSG00000005448.12	626	11.67	0	20.72	5.47
ENST00000482880.1	ENSG00000005448.12	1026	16.88	11.43	56.4	65.9
ENST00000493982.1	ENSG00000005448.12	563	0	0	0	0
ENST00000331536.3	ENSG00000005469.7	3175	504.41	478.04	722.56	702.12
ENST00000412227.2	ENSG00000005469.7	1213	37.07	49.77	65.27	54.59
ENST00000419147.2	ENSG00000005469.7	2959	34.35	115.19	137.06	70.35
ENST00000442291.1	ENSG00000005469.7	1993	0	0	6.27	53.07
ENST00000469785.1	ENSG00000005469.7	553	6.55	3.24	8.44	7.22
ENST00000479014.1	ENSG00000005469.7	523	2.52	1.76	44.92	9.65
ENST00000488850.1	ENSG00000005469.7	575	4.1	0	3.48	0
ENST00000265723.4	ENSG00000005471.11	4020	0	0	0	72.62
ENST00000358400.3	ENSG00000005471.11	3826	0	0	125.63	104.95
ENST00000359206.3	ENSG00000005471.11	3923	19	17	19	0
ENST00000417608.1	ENSG00000005471.11	2007	0	0	0	0
ENST00000440025.1	ENSG00000005471.11	523	0	0	0	1.18
ENST00000453593.1	ENSG00000005471.11	3699	0	0	19.03	0
ENST00000467079.1	ENSG00000005471.11	794	0	0	0	0.97
ENST00000467983.1	ENSG00000005471.11	414	0	0	7.34	0.28
ENST00000469770.1	ENSG00000005471.11	746	0	0	0	0
ENST00000473795.1	ENSG00000005471.11	1115	0	0	0	0
ENST00000545634.1	ENSG00000005471.11	3840	0	0	0	0
ENST00000257745.4	ENSG00000005483.15	6714	3877.82	4484.63	4044.2	3768.08
ENST00000311117.3	ENSG00000005483.15	6874	1490.34	1044.08	1836.32	2135.01
ENST00000334877.4	ENSG00000005483.15	7013	1509.68	1408	0	372.84
ENST00000334884.5	ENSG00000005483.15	6840	0	0	122.12	2.83
ENST00000334914.7	ENSG00000005483.15	5139	0	0	646.53	266.15
ENST00000468607.1	ENSG00000005483.15	558	0	8.94	3.97	5.3
ENST00000473063.1	ENSG00000005483.15	375	59.52	24.67	0	0
ENST00000474203.1	ENSG00000005483.15	617	8.66	0	2.8	0
ENST00000476671.1	ENSG00000005483.15	2520	148.09	209.29	85.06	112.49
ENST00000478079.1	ENSG00000005483.15	597	23.95	9.16	27.47	20.43
ENST00000478990.1	ENSG00000005483.15	1500	45.1	0	10.13	29.48
ENST00000479838.2	ENSG00000005483.15	883	5.23	7.79	4.22	5.86
ENST00000480368.1	ENSG00000005483.15	679	0	0	0	2.78
ENST00000482560.2	ENSG00000005483.15	1759	0	0	2.74	12.55
ENST00000485619.1	ENSG00000005483.15	397	2.06	0	0	0
ENST00000495267.1	ENSG00000005483.15	1133	158.5	221.04	275.43	168.17
ENST00000496191.1	ENSG00000005483.15	584	2.06	4.39	0	1.05
ENST00000006777.6	ENSG00000005486.12	1802	7784.39	6868.74	1797.39	1900.54
ENST00000318622.4	ENSG00000005486.12	1878	1388.37	1084.32	463.93	319.19
ENST00000428119.1	ENSG00000005486.12	1274	5530.44	6003.95	567.3	948.2
ENST00000454791.1	ENSG00000005486.12	1831	0	0	587.75	653.3
ENST00000466232.1	ENSG00000005486.12	566	0	0	0	8.41
ENST00000467406.2	ENSG00000005486.12	636	11.8	5.99	14.29	32.77
ENST00000468304.1	ENSG00000005486.12	803	0	0	37.34	17.51
ENST00000468644.1	ENSG00000005486.12	555	0	0	0	0
ENST00000476218.1	ENSG00000005486.12	181	0	0	0	2.07
ENST00000293894.3	ENSG00000005513.9	3049	4986.07	4961.05	347.39	317.09
ENST00000566034.1	ENSG00000005513.9	4153	703.93	626.95	46.61	68.91
ENST00000355619.5	ENSG00000005812.6	3503	2818.79	3442.47	1582.09	1398.41
ENST00000417323.1	ENSG00000005812.6	1093	224.15	122.16	63.63	148.75
ENST00000470210.1	ENSG00000005812.6	561	0	0	0	0
ENST00000472949.1	ENSG00000005812.6	329	0	0	0	0
ENST00000477982.1	ENSG00000005812.6	748	70.11	72.79	34.29	62.35
ENST00000485797.1	ENSG00000005812.6	520	23.96	14.58	0	8.49
ENST00000007708.3	ENSG00000005882.7	2384	7998.84	7869.34	1132.17	1048.01
ENST00000503076.1	ENSG00000005882.7	560	43.79	32.36	14.86	4.8
ENST00000503176.1	ENSG00000005882.7	3440	855.72	794.36	335.8	350.19
ENST00000503614.1	ENSG00000005882.7	947	0	0	19.29	58.52
ENST00000505440.1	ENSG00000005882.7	615	25.72	12.23	0	0
ENST00000505897.1	ENSG00000005882.7	865	821.4	713.07	103.34	95.05
ENST00000506242.1	ENSG00000005882.7	517	27.45	0	0	0
ENST00000506647.1	ENSG00000005882.7	660	24.28	22.27	0	4.41
ENST00000508030.1	ENSG00000005882.7	578	0	0	0	0
ENST00000508960.1	ENSG00000005882.7	553	124.84	192.53	27.53	50.46
ENST00000510219.2	ENSG00000005882.7	576	7.2	0	0	0
ENST00000511026.1	ENSG00000005882.7	577	15.04	22.15	0	0
ENST00000512204.1	ENSG00000005882.7	806	47.95	3.89	0	18.08
ENST00000512238.1	ENSG00000005882.7	590	0	0	0	0
ENST00000515040.1	ENSG00000005882.7	567	103.77	268.82	0	41.49
ENST00000007722.7	ENSG00000005884.13	3665	189.33	148.99	0	0
ENST00000320031.8	ENSG00000005884.13	4888	2292.6	2187.67	12187.6	13473.5
ENST00000504417.1	ENSG00000005884.13	227	1	0	0	4.01
ENST00000505306.1	ENSG00000005884.13	5479	48.31	86.65	175.42	270.34
ENST00000505552.1	ENSG00000005884.13	600	0	0	4	3.52
ENST00000505612.1	ENSG00000005884.13	576	22.23	12.1	25.44	11.38
ENST00000506401.2	ENSG00000005884.13	1817	0	0	0	0
ENST00000506437.1	ENSG00000005884.13	3055	475.01	428.98	337.17	290.92
ENST00000506827.1	ENSG00000005884.13	827	0	0	0	0
ENST00000507771.1	ENSG00000005884.13	399	25.86	0	26.55	0
ENST00000508100.1	ENSG00000005884.13	549	0	3.05	0	1.67
ENST00000510809.1	ENSG00000005884.13	518	1.45	1.93	4.63	8.26
ENST00000512553.1	ENSG00000005884.13	351	0	0	2.52	3.45
ENST00000514834.1	ENSG00000005884.13	860	86.52	0	44.01	178.91
ENST00000515147.1	ENSG00000005884.13	535	31.03	0	112.66	81.4
ENST00000544892.1	ENSG00000005884.13	1810	10.65	0	54.98	56.65
ENST00000570989.1	ENSG00000005884.13	2495	47	27.62	4	11.01
ENST00000304543.5	ENSG00000005889.11	2996	107.84	0	431.29	267.05
ENST00000338565.3	ENSG00000005889.11	2906	0	0	0	0
ENST00000379177.1	ENSG00000005889.11	7558	532.46	246.06	708.95	250.27
ENST00000379188.3	ENSG00000005889.11	7396	668.87	943.85	844.13	926.05
ENST00000419690.1	ENSG00000005889.11	300	0.6	1.61	0	0
ENST00000428571.1	ENSG00000005889.11	600	4.21	8.61	2.65	0
ENST00000459724.1	ENSG00000005889.11	673	0	0	0	0
ENST00000474385.1	ENSG00000005889.11	651	0	0	5.02	3.12
ENST00000480195.1	ENSG00000005889.11	367	0	0	0	0
ENST00000497813.1	ENSG00000005889.11	475	0	0	4	1
ENST00000539115.1	ENSG00000005889.11	6801	0.06	117.67	0	354.45
ENST00000540034.1	ENSG00000005889.11	2936	62.95	142.2	197.96	288.06
ENST00000200639.4	ENSG00000005893.11	1867	2703.66	2886.6	2662.38	2780.8
ENST00000371335.4	ENSG00000005893.11	4030	6150.22	7758.94	3880.52	3779.04
ENST00000434600.2	ENSG00000005893.11	2089	1562.36	2014.94	181.22	291.06
ENST00000486593.1	ENSG00000005893.11	1069	936.54	368.64	808.15	866.24
ENST00000538785.1	ENSG00000005893.11	1433	0	0	35.88	0
ENST00000540603.1	ENSG00000005893.11	1625	1249.22	1052.87	1190.86	872.86
ENST00000304718.4	ENSG00000005955.8	2847	4762.55	5069.94	3966.23	4250.21
ENST00000483256.1	ENSG00000005955.8	2281	82.45	73.04	254.91	249.48
ENST00000485685.2	ENSG00000005955.8	2315	78.17	78.03	112.09	98.49
ENST00000486208.2	ENSG00000005955.8	3497	95.28	54.52	177.87	124.92
ENST00000495023.1	ENSG00000005955.8	2346	10.79	14.02	54.02	30.07
ENST00000586045.1	ENSG00000005955.8	851	23.62	49.42	43.66	61.19
ENST00000588222.1	ENSG00000005955.8	665	40.39	26.92	64.47	93.86
ENST00000589269.1	ENSG00000005955.8	680	457.5	339.16	283.28	197.15
ENST00000593016.1	ENSG00000005955.8	695	20.25	33.96	10.47	3.62
ENST00000262407.5	ENSG00000005961.13	3333	123.45	197.22	147.96	165.57
ENST00000353281.4	ENSG00000005961.13	3232	69.36	10.21	0	22.17
ENST00000377068.3	ENSG00000005961.13	1212	0	0	0	0
ENST00000587295.1	ENSG00000005961.13	496	0	4.54	0	0
ENST00000588098.1	ENSG00000005961.13	281	14.25	0	0	0
ENST00000589645.1	ENSG00000005961.13	579	0	9.75	0	4.34
ENST00000591990.1	ENSG00000005961.13	565	0	0	4.51	6.79
ENST00000592075.1	ENSG00000005961.13	461	0	6.85	0	0
ENST00000592226.1	ENSG00000005961.13	1170	62.21	49.59	26.67	35.87
ENST00000592253.1	ENSG00000005961.13	462	16.19	11.28	14.06	2.36
ENST00000592462.1	ENSG00000005961.13	3189	119.55	92.04	66.8	55.9
ENST00000592944.1	ENSG00000005961.13	563	0	2.52	0	0
ENST00000257621.4	ENSG00000005981.8	582	0	3.88	0.94	0
ENST00000325885.5	ENSG00000005981.8	3825	107	109.53	57.06	64.66
ENST00000428113.1	ENSG00000005981.8	1547	0	1.6	0	10.34
ENST00000353258.3	ENSG00000006007.7	2954	5827.24	5745.29	3823.47	3725.74
ENST00000563645.1	ENSG00000006007.7	769	894.85	520.28	283.99	533.46
ENST00000564172.1	ENSG00000006007.7	2238	872.15	1121.37	809.21	890.21
ENST00000569773.1	ENSG00000006007.7	739	0	0	2.32	0
ENST00000569899.1	ENSG00000006007.7	1618	30.77	9.07	16.01	14.59
ENST00000358607.6	ENSG00000006015.13	839	1005.91	810.81	496.8	665.83
ENST00000450195.2	ENSG00000006015.13	702	443.47	393.87	98.39	103.04
ENST00000595077.1	ENSG00000006015.13	2465	234.75	218.68	130.43	108.78
ENST00000595490.1	ENSG00000006015.13	410	0	28.77	0	9.3
ENST00000597371.1	ENSG00000006015.13	1081	1108.38	1193.26	508.63	636.01
ENST00000598375.1	ENSG00000006015.13	1792	103.67	164.92	5.44	21.35
ENST00000600997.1	ENSG00000006015.13	2275	220.33	80.75	235.97	323.11
ENST00000601736.1	ENSG00000006015.13	491	148.49	116.94	93.33	36.57
ENST00000392386.3	ENSG00000006016.6	1792	849.63	770.02	1981.26	2316.99
ENST00000593286.1	ENSG00000006016.6	514	5.15	12.25	0	2.03
ENST00000594325.1	ENSG00000006016.6	1020	0	4.11	0	1.02
ENST00000596360.1	ENSG00000006016.6	413	157.7	184.42	321.79	271.21
ENST00000597131.1	ENSG00000006016.6	520	90.53	69.2	191.95	256.75
ENST00000007414.3	ENSG00000006025.7	3640	1402.55	1249.99	1264.31	1639.89
ENST00000392507.3	ENSG00000006025.7	3349	43.05	29.79	58.99	44.62
ENST00000578461.1	ENSG00000006025.7	430	37.62	15.77	33.22	9.07
ENST00000579728.1	ENSG00000006025.7	4104	45.97	148.83	241.84	128.01
ENST00000580140.1	ENSG00000006025.7	1594	11.82	10.32	15.08	25.1
ENST00000580226.1	ENSG00000006025.7	854	77.93	42.95	56.32	49.54
ENST00000580808.1	ENSG00000006025.7	495	13.48	24.43	0	8.8
ENST00000583167.1	ENSG00000006025.7	4497	138.3	270.35	348.89	373.62
ENST00000584698.1	ENSG00000006025.7	688	30.29	4.57	10.37	12.19
ENST00000585051.1	ENSG00000006025.7	614	0	0	5.99	11.16
ENST00000261713.4	ENSG00000006042.7	826	13.98	2.21	1.97	2.08
ENST00000394642.3	ENSG00000006042.7	1683	1751.62	1866.23	1103.27	1244.37
ENST00000395149.2	ENSG00000006042.7	808	0	0	37.22	0
ENST00000439138.1	ENSG00000006042.7	896	80.49	78.52	254.71	148.06
ENST00000578289.1	ENSG00000006042.7	806	152.06	65.31	104.25	125.83
ENST00000579849.1	ENSG00000006042.7	4434	789.46	675.63	69.59	127.26
ENST00000582227.1	ENSG00000006042.7	424	0	0	15.99	0
ENST00000583120.1	ENSG00000006042.7	504	8.6	0	0	0
ENST00000583437.2	ENSG00000006042.7	776	54.8	70.11	0	11.4
ENST00000007699.5	ENSG00000006047.8	1590	77.63	53.98	269.61	329.66
ENST00000570627.1	ENSG00000006047.8	653	0	0	3.16	21.55
ENST00000570720.1	ENSG00000006047.8	606	5.26	0	10.43	9.73
ENST00000571127.1	ENSG00000006047.8	791	2.04	0	0	0
ENST00000571464.1	ENSG00000006047.8	640	6.57	0	0	0
ENST00000571485.1	ENSG00000006047.8	4553	38.97	64.66	389.14	448.72
ENST00000571834.1	ENSG00000006047.8	2195	32.52	29.36	106.66	125.34
ENST00000344686.2	ENSG00000006062.9	4465	162.41	241.7	374.58	731.52
ENST00000376926.4	ENSG00000006062.9	1476	0	0	0	0
ENST00000586644.1	ENSG00000006062.9	570	11.71	12.36	10.4	2.31
ENST00000587332.1	ENSG00000006062.9	4452	838.38	783.18	748.84	550.11
ENST00000592267.1	ENSG00000006062.9	3152	178.51	192.75	223.19	235.07
ENST00000339208.6	ENSG00000006114.11	8229	1910.86	1930.44	2041.1	2008.92
ENST00000345615.4	ENSG00000006114.11	4841	24.7	0	96.81	375.53
ENST00000346661.4	ENSG00000006114.11	8134	807.64	824	0.02	0
ENST00000378189.1	ENSG00000006114.11	4234	22.1	34.79	9.44	11.2
ENST00000394378.2	ENSG00000006114.11	3859	47.81	0	0	19.72
ENST00000394379.3	ENSG00000006114.11	1375	10.82	27.16	112.04	106.06
ENST00000421408.2	ENSG00000006114.11	3649	29.12	46.44	90.96	106.38
ENST00000427923.1	ENSG00000006114.11	527	0	4.72	1.07	2.12
ENST00000502449.2	ENSG00000006114.11	4050	255.9	349.55	382.91	329.01
ENST00000508220.1	ENSG00000006114.11	1673	13.19	12.31	6.68	15.37
ENST00000585472.1	ENSG00000006114.11	3787	287.68	281.96	604.95	135.04
ENST00000585689.1	ENSG00000006114.11	485	0	0	0	0
ENST00000587040.1	ENSG00000006114.11	449	3.14	0	0	0
ENST00000588194.1	ENSG00000006114.11	1769	22.05	0	0	0
ENST00000590102.1	ENSG00000006114.11	280	0	0	0	0
ENST00000591288.1	ENSG00000006114.11	3406	0	0	10.46	43.24
ENST00000591427.1	ENSG00000006114.11	709	0	8.64	3.58	59.42
ENST00000005284.3	ENSG00000006116.3	3088	4459	4275	2	4
ENST00000005286.4	ENSG00000006118.10	3480	6728.57	6416.52	2524.47	2922.74
ENST00000453848.2	ENSG00000006118.10	3346	1697.38	1738.05	610.93	570.57
ENST00000534983.1	ENSG00000006118.10	2477	103.82	147.06	316.11	331.57
ENST00000535480.1	ENSG00000006118.10	692	879.11	668.71	93.62	144.99
ENST00000536409.1	ENSG00000006118.10	454	17.18	15.65	0	8.74
ENST00000536928.1	ENSG00000006118.10	582	0	5.08	0	0
ENST00000537065.1	ENSG00000006118.10	324	0	0	1.57	1.33
ENST00000537110.1	ENSG00000006118.10	446	49	46	25	30
ENST00000538090.1	ENSG00000006118.10	591	12.44	11.42	3.73	10.69
ENST00000539899.1	ENSG00000006118.10	422	0	0	0	0
ENST00000540112.1	ENSG00000006118.10	2013	1109.89	1056.32	435.55	643.34
ENST00000540276.1	ENSG00000006118.10	514	0	0	0	0
ENST00000543732.1	ENSG00000006118.10	742	56.68	86.98	66.82	59.02
ENST00000544065.1	ENSG00000006118.10	990	0	0	0	45.29
ENST00000544098.1	ENSG00000006118.10	3981	644.92	418.22	309.21	237.74
ENST00000319273.5	ENSG00000006128.7	1239	456.85	393.88	8.44	0
ENST00000346867.4	ENSG00000006128.7	1011	86.94	162.84	0	0
ENST00000350485.4	ENSG00000006128.7	975	48.47	118.68	0	0
ENST00000491437.1	ENSG00000006128.7	607	10.49	34.59	10.56	0
ENST00000495916.1	ENSG00000006128.7	522	7.25	0	0	0
ENST00000219069.5	ENSG00000006194.6	3830	1891.34	1598.85	1848.27	1976.98
ENST00000538765.1	ENSG00000006194.6	1721	522.33	496.02	951.05	801.86
ENST00000572123.1	ENSG00000006194.6	243	0	0	0.3	1
ENST00000572748.1	ENSG00000006194.6	759	0	0	10.03	24.84
ENST00000573578.1	ENSG00000006194.6	1636	109.97	130.54	129.78	139.2
ENST00000573951.1	ENSG00000006194.6	2468	96	94	92.7	75
ENST00000574253.1	ENSG00000006194.6	1139	61.42	61.45	37.21	100.85
ENST00000574674.1	ENSG00000006194.6	691	17.11	11.05	65.12	32.59
ENST00000575332.1	ENSG00000006194.6	2637	59.53	93.76	82.66	93.18
ENST00000575823.1	ENSG00000006194.6	851	57.31	50.33	111.86	91.51
ENST00000006053.6	ENSG00000006210.6	3321	7658.35	7611.65	1007.36	1209.88
ENST00000563383.1	ENSG00000006210.6	3313	0	0	18.14	0
ENST00000564948.1	ENSG00000006210.6	563	4.2	7.26	0	5.68
ENST00000565912.1	ENSG00000006210.6	5796	23.45	43.09	10.5	6.44
ENST00000352832.5	ENSG00000006283.13	7848	2646.89	3172.19	0	0
ENST00000354983.4	ENSG00000006283.13	7834	0.18	0	0	8.36
ENST00000358244.5	ENSG00000006283.13	7030	202.35	161.66	0	0
ENST00000359106.5	ENSG00000006283.13	7648	294.35	31.06	0	0
ENST00000360761.4	ENSG00000006283.13	7497	577.4	165.19	38.74	63.25
ENST00000416767.4	ENSG00000006283.13	4899	0	0	0	0
ENST00000429973.2	ENSG00000006283.13	7120	1744.68	1683.46	0	0
ENST00000442258.2	ENSG00000006283.13	7226	0	0	0	0
ENST00000502264.1	ENSG00000006283.13	6921	0	0	0	0
ENST00000503436.1	ENSG00000006283.13	6752	0	0	0	0
ENST00000503485.1	ENSG00000006283.13	6768	0	0	0	0
ENST00000503607.1	ENSG00000006283.13	6698	0	0	0	0
ENST00000504076.1	ENSG00000006283.13	6788	0	0	0	0
ENST00000505165.1	ENSG00000006283.13	6633	0	0	0	0
ENST00000506406.1	ENSG00000006283.13	6821	0	0	0	0
ENST00000506520.1	ENSG00000006283.13	1478	0	0	0	1.39
ENST00000507336.1	ENSG00000006283.13	7116	0	0	0	0
ENST00000507510.2	ENSG00000006283.13	7014	0	0	0	0
ENST00000507609.1	ENSG00000006283.13	6849	44.06	159.23	0	0
ENST00000507896.1	ENSG00000006283.13	6600	0	0	0	0
ENST00000510115.1	ENSG00000006283.13	6912	0	0.84	0	0
ENST00000510366.1	ENSG00000006283.13	6714	0	0	0	0
ENST00000511765.1	ENSG00000006283.13	6767	0	0	0	0
ENST00000511768.1	ENSG00000006283.13	6731	0	0	0	0
ENST00000512389.1	ENSG00000006283.13	6837	0	0	0	0
ENST00000513689.2	ENSG00000006283.13	6879	314.01	288.13	0	0
ENST00000513964.1	ENSG00000006283.13	6735	0	0	0	0
ENST00000514079.1	ENSG00000006283.13	6891	0	0	0	0
ENST00000514181.1	ENSG00000006283.13	6795	0	0	0	0
ENST00000514717.1	ENSG00000006283.13	6699	0	0	15.26	0
ENST00000515165.1	ENSG00000006283.13	6870	0	0	0	0
ENST00000515411.1	ENSG00000006283.13	6960	0	0	0	0
ENST00000515765.1	ENSG00000006283.13	6981	0	0.07	0	0
ENST00000570567.1	ENSG00000006283.13	1255	50.08	77.16	0	0
ENST00000326577.4	ENSG00000006327.9	1033	104.3	114.79	3537.62	3926.62
ENST00000341627.5	ENSG00000006327.9	881	73.84	117.34	839.2	812.65
ENST00000571351.1	ENSG00000006327.9	1678	22.96	11.87	476.03	594.9
ENST00000573001.1	ENSG00000006327.9	648	0	0	0	0
ENST00000574699.1	ENSG00000006327.9	583	8.91	0	10.55	10.05
ENST00000575124.1	ENSG00000006327.9	1133	0	0	57.6	60.78
ENST00000575836.1	ENSG00000006327.9	161	0	0	0	0
ENST00000007660.5	ENSG00000006377.9	1790	88.78	82.28	84.51	85.96
ENST00000493273.2	ENSG00000006377.9	1612	1.24	0	23.4	1.76
ENST00000518156.2	ENSG00000006377.9	2304	24.98	29.35	33.15	49.92
ENST00000555308.1	ENSG00000006377.9	666	0	5.37	5.93	7.36
ENST00000381250.4	ENSG00000006432.11	4025	0	24.32	0	52.9
ENST00000553414.1	ENSG00000006432.11	3544	48.56	68.05	0	44.7
ENST00000554024.1	ENSG00000006432.11	548	1	0	0	0
ENST00000554146.1	ENSG00000006432.11	2982	0	0	14.33	0
ENST00000554752.2	ENSG00000006432.11	11169	7701.1	7965.63	1283.67	1247.39
ENST00000555993.2	ENSG00000006432.11	4449	17.35	0	0	0
ENST00000005257.2	ENSG00000006451.3	2880	2744	2940.38	3478.91	3573.99
ENST00000434466.1	ENSG00000006451.3	768	0	18.72	107.71	116.39
ENST00000436179.1	ENSG00000006451.3	882	0	0	10.04	10.63
ENST00000466491.1	ENSG00000006451.3	320	0	0	0	0
ENST00000468201.1	ENSG00000006451.3	705	0	8.9	45.34	0
ENST00000242066.5	ENSG00000006468.9	6348	0	0	35.47	0
ENST00000343495.5	ENSG00000006468.9	6752	47.57	0	0	0
ENST00000399357.3	ENSG00000006468.9	6096	2649.96	3289.67	0	0
ENST00000403527.1	ENSG00000006468.9	3363	734.31	1095.76	0	0
ENST00000403685.1	ENSG00000006468.9	1603	1358.24	1136.45	330.65	365.06
ENST00000405192.2	ENSG00000006468.9	4402	454.52	1178.95	0	0.05
ENST00000405218.2	ENSG00000006468.9	3391	656.84	551.3	126.14	219.26
ENST00000405358.4	ENSG00000006468.9	4181	4092.54	4414.66	749.68	720.63
ENST00000420159.2	ENSG00000006468.9	6231	0	0	0	0
ENST00000421381.1	ENSG00000006468.9	554	0	11.43	26.5	7.75
ENST00000430479.1	ENSG00000006468.9	6740	1813.28	2319.33	346.16	339.92
ENST00000431887.1	ENSG00000006468.9	580	9.67	8.47	0	5.14
ENST00000433547.1	ENSG00000006468.9	546	0	0	2.76	0
ENST00000438956.1	ENSG00000006468.9	1141	99.44	90.22	16.2	0
ENST00000443137.1	ENSG00000006468.9	2050	61.27	0	91.66	45.48
ENST00000443608.1	ENSG00000006468.9	784	0	35.47	0	4.78
ENST00000460438.1	ENSG00000006468.9	570	0	0	0	0
ENST00000472931.2	ENSG00000006468.9	1296	34.58	16.59	0	0
ENST00000476355.1	ENSG00000006468.9	846	66.98	72.58	0	10.04
ENST00000476720.2	ENSG00000006468.9	848	40.78	52.94	27.12	0
ENST00000483075.1	ENSG00000006468.9	622	15.29	0	0	12.73
ENST00000485475.1	ENSG00000006468.9	550	0	0	0	0
ENST00000493831.1	ENSG00000006468.9	536	6.5	13.18	6.66	1.08
ENST00000497115.1	ENSG00000006468.9	584	245.21	0	0	35.08
ENST00000355413.4	ENSG00000006530.11	3849	1987.2	1934.63	1699.28	1920.91
ENST00000465241.1	ENSG00000006530.11	988	2.1	0	6.42	5.09
ENST00000473247.1	ENSG00000006530.11	1550	930.52	750.53	1101.08	1223.02
ENST00000473884.1	ENSG00000006530.11	568	28.78	53.86	15.23	8.83
ENST00000492693.1	ENSG00000006530.11	1046	1.05	3.16	1.04	3.14
ENST00000494053.1	ENSG00000006530.11	567	0	0	0	0
ENST00000494688.1	ENSG00000006530.11	951	0	0	0	0
ENST00000495028.1	ENSG00000006530.11	567	4.87	0	5.5	36.53
ENST00000496273.1	ENSG00000006530.11	491	0	0	8.92	3.36
ENST00000496784.1	ENSG00000006530.11	921	3.7	22.74	31.93	20.12
ENST00000535825.1	ENSG00000006530.11	976	13.77	12.08	89.6	0
ENST00000007633.8	ENSG00000006534.11	2807	0	0	25.28	38.3
ENST00000316367.6	ENSG00000006534.11	764	0	0	0	6.28
ENST00000342456.6	ENSG00000006534.11	2699	22.33	0	676.74	958.47
ENST00000433100.1	ENSG00000006534.11	2277	0	0	0	0
ENST00000434449.1	ENSG00000006534.11	2783	102.92	181.26	1235.13	1053.3
ENST00000525518.1	ENSG00000006534.11	708	0	0	0	0
ENST00000526609.1	ENSG00000006534.11	816	0	0	2.23	8.86
ENST00000527179.1	ENSG00000006534.11	1228	0	0	2.16	0
ENST00000527514.1	ENSG00000006534.11	603	2.19	0	8.83	14.48
ENST00000529232.1	ENSG00000006534.11	5876	0	12.81	262.18	315.56
ENST00000530046.1	ENSG00000006534.11	2076	0	0	0	0
ENST00000531459.1	ENSG00000006534.11	1591	3.19	1.93	55.22	61.51
ENST00000539229.1	ENSG00000006534.11	2849	43.37	0	36.23	69.23
ENST00000005226.7	ENSG00000006611.11	2700	0	0	7.83	3.49
ENST00000318024.4	ENSG00000006611.11	2237	136.83	310.06	19.03	50.68
ENST00000526181.1	ENSG00000006611.11	1040	0	0	18.63	24.01
ENST00000526313.1	ENSG00000006611.11	2149	0	45.95	0	0
ENST00000527020.1	ENSG00000006611.11	2159	90.38	0	69.77	82.28
ENST00000527551.1	ENSG00000006611.11	371	0	0	0	0
ENST00000527720.1	ENSG00000006611.11	2278	0	0	0	0
ENST00000529563.1	ENSG00000006611.11	942	443.79	383	25.74	22.54
ENST00000530700.1	ENSG00000006611.11	403	0	0	0	0
ENST00000534556.1	ENSG00000006611.11	244	0	0	0	0
ENST00000265728.1	ENSG00000006634.3	3907	44.34	30.51	90.11	66.39
ENST00000413643.1	ENSG00000006634.3	2694	0	50.38	434.04	612.51
ENST00000430279.1	ENSG00000006634.3	1274	33.76	0	2.03	21.26
ENST00000431138.1	ENSG00000006634.3	2342	178.53	173.13	1810.88	1692.7
ENST00000486925.1	ENSG00000006634.3	574	10.08	2.97	226.23	245.49
ENST00000495067.1	ENSG00000006634.3	797	0	0	24.84	9.3
ENST00000498144.1	ENSG00000006634.3	576	12.28	0	59.55	13.72
ENST00000498726.1	ENSG00000006634.3	552	4.01	0	15.34	3.63
ENST00000375190.4	ENSG00000006638.7	2608	42.26	18.37	151	116.11
ENST00000411851.3	ENSG00000006638.7	1494	3.23	10.06	0	29.3
ENST00000587717.1	ENSG00000006638.7	470	0	0	0	0
ENST00000589966.1	ENSG00000006638.7	1814	3.52	21.56	0	33.59
ENST00000221265.3	ENSG00000006712.10	2066	4459.59	4227.53	3749.48	3816.11
ENST00000221266.7	ENSG00000006712.10	1631	0	0	0	0
ENST00000416728.3	ENSG00000006712.10	1383	13.09	23.14	36.19	0
ENST00000595379.1	ENSG00000006712.10	281	5.13	2.57	3.62	3.54
ENST00000595564.1	ENSG00000006712.10	1810	5.33	58.65	34.87	81.26
ENST00000595797.1	ENSG00000006712.10	760	19.46	26.69	12.21	16.88
ENST00000597365.1	ENSG00000006712.10	606	3	11.43	0	0
ENST00000598127.1	ENSG00000006712.10	558	6.4	0	2.64	0
ENST00000598594.1	ENSG00000006712.10	280	6.01	0	0	5.21
ENST00000265745.9	ENSG00000006715.11	769	21.82	25.86	16.51	55.9
ENST00000310301.4	ENSG00000006715.11	5903	3924.16	4244.21	1992.41	1801.67
ENST00000395969.2	ENSG00000006715.11	3181	2074.56	2222.47	1436.7	1276.42
ENST00000413141.1	ENSG00000006715.11	575	0	0	0	0
ENST00000414632.1	ENSG00000006715.11	548	98.51	54.52	211.16	115.06
ENST00000418457.2	ENSG00000006715.11	532	16.67	35.63	0	0
ENST00000439468.1	ENSG00000006715.11	354	5.65	13.66	0	0
ENST00000448833.1	ENSG00000006715.11	711	29.95	21.45	35.57	52.5
ENST00000457055.1	ENSG00000006715.11	465	0	0	0	0
ENST00000462429.1	ENSG00000006715.11	347	0	0	0	0
ENST00000466017.1	ENSG00000006715.11	591	0	0	0	0
ENST00000482217.1	ENSG00000006715.11	951	166.35	136.3	165.75	111.79
ENST00000485955.1	ENSG00000006715.11	571	0	0	3	0
ENST00000490924.1	ENSG00000006715.11	496	6.33	11.89	5.89	1.66
ENST00000262444.9	ENSG00000006740.12	3001	0	0	0	0
ENST00000340825.3	ENSG00000006740.12	4211	31.03	1332.25	338.35	277.95
ENST00000379672.5	ENSG00000006740.12	4228	6618.73	5183.28	0	0
ENST00000538915.2	ENSG00000006740.12	666	15.8	5.95	3.78	0
ENST00000544416.2	ENSG00000006740.12	2533	15.03	15.45	0	0
ENST00000578087.1	ENSG00000006740.12	559	0	3.2	0	0
ENST00000578442.1	ENSG00000006740.12	1119	5.77	4.56	0	2.78
ENST00000580768.1	ENSG00000006740.12	4143	1398.31	1074.54	54.32	118.6
ENST00000581437.1	ENSG00000006740.12	629	0	0	0	0
ENST00000583608.1	ENSG00000006740.12	730	11.49	0	0	0
ENST00000584974.1	ENSG00000006740.12	4428	303.84	322.77	51.55	32.66
ENST00000338034.4	ENSG00000006744.14	3148	1588.34	1610.32	4073.84	4274.36
ENST00000395962.2	ENSG00000006744.14	2924	1330.2	1205.3	1928.13	2567.81
ENST00000426905.3	ENSG00000006744.14	2671	207.5	108.53	0	74.58
ENST00000446899.1	ENSG00000006744.14	858	9.49	0	0	0
ENST00000465825.1	ENSG00000006744.14	2793	211.87	74.77	266.11	208.26
ENST00000476042.1	ENSG00000006744.14	428	0	8.55	6.2	6.38
ENST00000480891.1	ENSG00000006744.14	2737	0	78.93	91.7	62.4
ENST00000484122.1	ENSG00000006744.14	3738	27.81	156.93	42.3	76.39
ENST00000487229.2	ENSG00000006744.14	2452	78.2	149.5	83.33	110.54
ENST00000491478.1	ENSG00000006744.14	758	79.51	44.55	311.35	322.4
ENST00000492559.1	ENSG00000006744.14	615	0	0	73.6	0
ENST00000578071.1	ENSG00000006744.14	579	0	0	0	0
ENST00000578104.1	ENSG00000006744.14	664	9.35	2.47	16.73	22.81
ENST00000578991.1	ENSG00000006744.14	550	6.7	42.76	29.26	6.39
ENST00000580504.1	ENSG00000006744.14	579	19.96	19.4	42.66	66.75
ENST00000581499.2	ENSG00000006744.14	581	0	0	0	0
ENST00000583371.1	ENSG00000006744.14	479	0.16	0	32.08	51.98
ENST00000584650.1	ENSG00000006744.14	2087	0	0	0	0
ENST00000609101.1	ENSG00000006744.14	866	0	0	210.71	0
ENST00000609345.1	ENSG00000006744.14	849	0	0	0	0
ENST00000609757.1	ENSG00000006744.14	588	3.91	0	0	3.95
ENST00000297029.5	ENSG00000006747.10	3137	263.25	198.07	0	36.05
ENST00000341757.5	ENSG00000006747.10	2569	65.37	46.12	24.85	24.95
ENST00000417018.1	ENSG00000006747.10	549	0	0	0	0
ENST00000436854.1	ENSG00000006747.10	570	0	7.11	0	0
ENST00000445618.2	ENSG00000006747.10	2518	5.38	122.7	21	0
ENST00000473722.1	ENSG00000006747.10	656	0	0	1.15	0
ENST00000476649.1	ENSG00000006747.10	969	0	0	0	0
ENST00000486980.1	ENSG00000006747.10	558	0	0	0	0
ENST00000518849.1	ENSG00000006747.10	536	0	0	0	0
ENST00000519209.1	ENSG00000006747.10	2660	0	0	0	0
ENST00000523729.1	ENSG00000006747.10	585	0	0	0	0
ENST00000217890.6	ENSG00000006756.11	2160	1.35	12.58	56.49	37.45
ENST00000381154.1	ENSG00000006756.11	5159	620.38	603.13	1325.67	1554.32
ENST00000458014.1	ENSG00000006756.11	580	0	0	0	1.63
ENST00000481340.1	ENSG00000006756.11	352	0	0	0	1.41
ENST00000494870.1	ENSG00000006756.11	663	5.64	0	85.09	41.78
ENST00000495294.1	ENSG00000006756.11	2032	3.62	11.3	13.02	26.41
ENST00000559324.1	ENSG00000006756.11	567	0	0	2.73	0
ENST00000381042.4	ENSG00000006757.7	3372	335.3	262.16	445.42	352.24
ENST00000442940.1	ENSG00000006757.7	652	109.57	124.16	237.58	274.63
ENST00000444736.1	ENSG00000006757.7	2752	267.42	0	0	96.14
ENST00000537427.1	ENSG00000006757.7	2559	204.7	362.68	0	0
ENST00000357103.4	ENSG00000006831.9	4018	10396.8	10643	9288.49	9357.79
ENST00000535774.1	ENSG00000006831.9	488	3.75	6.99	11.8	2
ENST00000537190.1	ENSG00000006831.9	569	1.19	3.82	5.17	2.52
ENST00000537545.1	ENSG00000006831.9	484	0	0	0	0
ENST00000540974.1	ENSG00000006831.9	480	0	1	0	0
ENST00000543456.1	ENSG00000006831.9	434	0	0	0	0
ENST00000544470.1	ENSG00000006831.9	793	3.22	2.15	5.54	8.69
ENST00000005995.3	ENSG00000007038.6	1101	7.75	0	446.51	806.08
ENST00000450020.3	ENSG00000007038.6	1106	0	0	765.41	645.2
ENST00000455114.1	ENSG00000007038.6	1159	0	0	126.4	0
ENST00000570594.1	ENSG00000007038.6	809	0	0	297.3	320.8
ENST00000570629.1	ENSG00000007038.6	626	1.25	0	0	0
ENST00000571141.1	ENSG00000007038.6	484	0	0	27.72	31.55
ENST00000574265.1	ENSG00000007038.6	860	0	8	676.09	595.61
ENST00000574813.1	ENSG00000007038.6	873	0	0	43.83	95.28
ENST00000575199.1	ENSG00000007038.6	679	0	0	54.78	56.58
ENST00000575739.1	ENSG00000007038.6	378	0	0	7	15
ENST00000577043.1	ENSG00000007038.6	814	0	0	97.95	208.88
ENST00000445755.2	ENSG00000007080.6	938	3075.31	2746.83	3273.36	3448.84
ENST00000596123.1	ENSG00000007080.6	580	21.81	29.69	36.85	57.97
ENST00000597436.1	ENSG00000007080.6	1055	733.36	766.91	556.74	765.69
ENST00000602080.1	ENSG00000007080.6	609	3.52	3.58	8.06	8.49
ENST00000262442.4	ENSG00000007174.13	13750	98.06	0	0	22.04
ENST00000396001.2	ENSG00000007174.13	3145	87.34	108.7	0	13.92
ENST00000454412.2	ENSG00000007174.13	13452	0	58.57	36.52	0
ENST00000578834.1	ENSG00000007174.13	542	9.1	0.83	8.96	2.38
ENST00000579406.1	ENSG00000007174.13	1906	58.95	52.48	0.12	0
ENST00000579602.1	ENSG00000007174.13	429	0	8.1	0	0
ENST00000579703.1	ENSG00000007174.13	854	0.19	4.04	0	0
ENST00000579813.1	ENSG00000007174.13	313	3.57	0	0	0
ENST00000579828.1	ENSG00000007174.13	1986	261.51	337.24	0	3.05
ENST00000580255.1	ENSG00000007174.13	546	19.14	12.03	0	1.31
ENST00000581682.1	ENSG00000007174.13	1460	0	0	4.4	0
ENST00000583192.1	ENSG00000007174.13	712	0	0	0	0.03
ENST00000584663.1	ENSG00000007174.13	541	0	1	0	0
ENST00000585197.1	ENSG00000007174.13	610	0	0	0	0
ENST00000608377.1	ENSG00000007174.13	3147	3.15	2	0	0.26
ENST00000389003.3	ENSG00000007202.10	6852	17.11	0	0	136.73
ENST00000528896.2	ENSG00000007202.10	7407	10908.9	10638.1	14824.1	14734
ENST00000544884.1	ENSG00000007202.10	6856	0	0	1353.69	1504.94
ENST00000577261.1	ENSG00000007202.10	862	42.87	11.39	108.12	63.77
ENST00000577417.1	ENSG00000007202.10	1839	36.34	36.14	60.07	79.33
ENST00000577580.1	ENSG00000007202.10	581	6.63	0	19.53	3.43
ENST00000579253.1	ENSG00000007202.10	446	7.76	7.93	5.57	16.47
ENST00000579924.2	ENSG00000007202.10	477	0	0	0	0
ENST00000580395.1	ENSG00000007202.10	577	39.97	22.9	48.16	39.84
ENST00000580882.1	ENSG00000007202.10	1582	15.46	0	0	10.37
ENST00000581064.1	ENSG00000007202.10	555	41.37	50.75	27.58	56.36
ENST00000581267.1	ENSG00000007202.10	449	0	0	0	0
ENST00000582417.1	ENSG00000007202.10	574	40.4	48.06	77.07	32.68
ENST00000582901.1	ENSG00000007202.10	509	2.33	2.39	17.86	9.77
ENST00000583403.1	ENSG00000007202.10	1271	0	5.67	34.44	12.41
ENST00000583860.1	ENSG00000007202.10	432	11.91	34.62	43.85	64.87
ENST00000323816.4	ENSG00000007237.14	8033	0	149.29	0	0
ENST00000396115.2	ENSG00000007237.14	929	0	0	0	0
ENST00000432992.2	ENSG00000007237.14	4970	0	0	327.4	450.29
ENST00000437099.2	ENSG00000007237.14	8003	56927.3	58659.6	3490.29	3834.73
ENST00000540214.1	ENSG00000007237.14	4277	178.7	104.75	0	0
ENST00000542249.1	ENSG00000007237.14	1799	0	0	13.9	48.63
ENST00000578456.1	ENSG00000007237.14	831	12.5	4.12	0	0
ENST00000578599.1	ENSG00000007237.14	556	7.14	15.61	0	0
ENST00000578655.1	ENSG00000007237.14	603	166.05	175.93	29.03	26.67
ENST00000579140.1	ENSG00000007237.14	474	0	11.46	0	0
ENST00000579158.1	ENSG00000007237.14	1528	0	0	80.5	32.8
ENST00000580043.1	ENSG00000007237.14	544	3.51	3.02	8.74	5
ENST00000580811.1	ENSG00000007237.14	567	19.65	50.59	0	0
ENST00000580865.1	ENSG00000007237.14	2417	588.28	541.56	0	0
ENST00000581112.1	ENSG00000007237.14	554	0	0	14.97	6.75
ENST00000581871.1	ENSG00000007237.14	538	22.23	42.12	0	0
ENST00000583882.1	ENSG00000007237.14	553	543.99	518.28	0	0
ENST00000584146.2	ENSG00000007237.14	732	0	0	0	0
ENST00000584389.1	ENSG00000007237.14	554	0	0	0	0
ENST00000585266.1	ENSG00000007237.14	3535	80.66	51.71	355.16	197.13
ENST00000006275.4	ENSG00000007255.6	805	245.52	123.3	468.01	513.34
ENST00000585934.1	ENSG00000007255.6	758	186.7	158.71	331.69	403.98
ENST00000587818.1	ENSG00000007255.6	433	2.97	0	8.39	9.56
ENST00000588062.1	ENSG00000007255.6	695	214.56	112.64	135.55	144.7
ENST00000592647.1	ENSG00000007255.6	514	23.25	46.35	65.37	46.43
ENST00000310132.6	ENSG00000007264.9	2133	523.05	420.79	971.29	1206.15
ENST00000395040.2	ENSG00000007264.9	1907	1409.18	1580.23	62.29	27.06
ENST00000395045.2	ENSG00000007264.9	2073	301.66	238.07	0	0
ENST00000585778.1	ENSG00000007264.9	1994	105.79	196.09	35.97	0
ENST00000587180.1	ENSG00000007264.9	741	19.55	3.44	0	7.72
ENST00000588983.1	ENSG00000007264.9	711	15.71	0	0	0
ENST00000590028.1	ENSG00000007264.9	724	0	0	0	0
ENST00000590493.1	ENSG00000007264.9	801	0	23.32	7.78	15.32
ENST00000590821.1	ENSG00000007264.9	659	0	0	0	0
ENST00000590849.1	ENSG00000007264.9	571	0	0	0	0
ENST00000590980.1	ENSG00000007264.9	562	0	0	0	0
ENST00000591059.1	ENSG00000007264.9	594	1.06	0	10.68	11.75
ENST00000592300.1	ENSG00000007264.9	544	0	3.06	0	0
ENST00000592612.1	ENSG00000007264.9	575	0	0	0	0
ENST00000343210.7	ENSG00000007341.14	1866	44.79	0	0	0
ENST00000358039.4	ENSG00000007341.14	4528	78.37	167.06	78.99	15.18
ENST00000360743.4	ENSG00000007341.14	4206	296.15	246.8	26.45	148.88
ENST00000361846.3	ENSG00000007341.14	4348	154.58	79.73	233.62	227.24
ENST00000369664.1	ENSG00000007341.14	862	0	0	4.52	5.01
ENST00000369666.1	ENSG00000007341.14	1815	0	39.07	0	22.03
ENST00000369668.2	ENSG00000007341.14	1973	0	0	54.4	25.7
ENST00000369669.1	ENSG00000007341.14	1743	2.3	0	21.08	26.39
ENST00000418497.1	ENSG00000007341.14	860	0	0.46	0	0
ENST00000459630.1	ENSG00000007341.14	765	0	0.11	6.26	6.57
ENST00000463235.1	ENSG00000007341.14	2574	7.4	0	0	6.89
ENST00000466360.1	ENSG00000007341.14	329	0	0	0	0
ENST00000467335.1	ENSG00000007341.14	990	85.6	71.41	25.07	98.08
ENST00000470519.1	ENSG00000007341.14	834	1.29	4.24	23.42	12.68
ENST00000470683.1	ENSG00000007341.14	752	67.7	74.05	105.23	93.94
ENST00000473206.1	ENSG00000007341.14	821	0	0	94.05	66.7
ENST00000477332.1	ENSG00000007341.14	848	11.7	28.02	48.19	49.75
ENST00000477682.1	ENSG00000007341.14	300	0	0	0	3.37
ENST00000479436.1	ENSG00000007341.14	572	0	0	54.97	39.29
ENST00000480988.1	ENSG00000007341.14	1857	21.74	0	4.16	0
ENST00000485753.1	ENSG00000007341.14	1023	0	0	15.22	8.18
ENST00000490067.1	ENSG00000007341.14	1780	0	0	54.38	28.22
ENST00000490715.1	ENSG00000007341.14	4483	0	0	0	0
ENST00000492274.1	ENSG00000007341.14	582	0	0	26.06	0
ENST00000495109.2	ENSG00000007341.14	591	4.9	17.93	35.53	8.25
ENST00000497235.1	ENSG00000007341.14	859	19.14	0	0	0
ENST00000497457.1	ENSG00000007341.14	1582	46.33	0	0	0
ENST00000498197.1	ENSG00000007341.14	472	0	2.26	0	0
ENST00000498383.1	ENSG00000007341.14	685	0	8.11	0	31.33
ENST00000538187.1	ENSG00000007341.14	1793	0	74.75	82.59	11.83
ENST00000543570.1	ENSG00000007341.14	1262	0	0	8.8	13.51
ENST00000544629.1	ENSG00000007341.14	1790	0	0	0	0
ENST00000007264.2	ENSG00000007376.3	2050	1040.8	734.68	1446.66	1720.07
ENST00000561734.1	ENSG00000007376.3	2159	120.36	190.57	258.29	156.9
ENST00000562070.1	ENSG00000007376.3	954	53.59	82.92	123.01	100.04
ENST00000563560.1	ENSG00000007376.3	587	0	0	0	0
ENST00000565377.1	ENSG00000007376.3	940	12.27	16.32	0	3.28
ENST00000565503.1	ENSG00000007376.3	561	0	1.7	0	1.72
ENST00000565809.1	ENSG00000007376.3	1918	58.44	159.5	0	23.76
ENST00000567114.1	ENSG00000007376.3	1835	145.01	134.79	337.22	551.87
ENST00000567283.1	ENSG00000007376.3	835	0	0	0	0
ENST00000569601.1	ENSG00000007376.3	917	22.52	20.53	69.83	65.36
ENST00000262316.6	ENSG00000007384.11	2992	392.47	339.02	1270.54	1614.99
ENST00000417043.1	ENSG00000007384.11	816	0	0	11.59	4.97
ENST00000419764.1	ENSG00000007384.11	435	0	0	0	0
ENST00000428730.1	ENSG00000007384.11	2751	109.35	131.27	167.46	93.72
ENST00000448893.1	ENSG00000007384.11	901	151.99	84.81	205.11	256.45
ENST00000450643.1	ENSG00000007384.11	615	0	0	0	0
ENST00000454039.2	ENSG00000007384.11	1871	19.36	58.43	74.49	131.14
ENST00000472390.1	ENSG00000007384.11	577	0	0	9.66	2.09
ENST00000482904.1	ENSG00000007384.11	556	2.17	0	0	15.24
ENST00000486045.1	ENSG00000007384.11	914	56.31	57.26	96.69	129.15
ENST00000487201.1	ENSG00000007384.11	1708	70.81	53.77	111.09	155.36
ENST00000493647.1	ENSG00000007384.11	935	62.54	52.45	145.36	172.89
ENST00000293872.8	ENSG00000007392.12	1456	1325.88	1013.29	772.03	760.74
ENST00000337351.4	ENSG00000007392.12	2097	182.54	137.02	219.32	270.41
ENST00000397780.1	ENSG00000007392.12	1335	135.02	188.69	144.63	165.53
ENST00000397783.1	ENSG00000007392.12	1504	549.69	596.68	404.78	443.46
ENST00000418978.1	ENSG00000007392.12	989	48.53	47.23	251.55	284.57
ENST00000419516.1	ENSG00000007392.12	1211	88.69	0	158.51	327.48
ENST00000426094.1	ENSG00000007392.12	2737	612.01	770.9	534.16	562.48
ENST00000428363.1	ENSG00000007392.12	498	0	0	0	0
ENST00000429378.1	ENSG00000007392.12	721	34.41	0	0	43.57
ENST00000430864.1	ENSG00000007392.12	695	0	0	8.83	6.99
ENST00000442701.1	ENSG00000007392.12	423	0	0	0	5.67
ENST00000443357.1	ENSG00000007392.12	833	197.99	258.07	87.33	161.7
ENST00000464711.1	ENSG00000007392.12	2134	230.58	282.32	283.78	313.88
ENST00000467552.1	ENSG00000007392.12	569	1.92	0	11.23	13.7
ENST00000468732.1	ENSG00000007392.12	573	225.31	214.44	129.91	173.8
ENST00000469109.1	ENSG00000007392.12	950	12.75	17.04	22.46	8.6
ENST00000490762.1	ENSG00000007392.12	2643	619.45	857.76	982.45	953.1
ENST00000494366.1	ENSG00000007392.12	668	0	0	8.1	0
ENST00000494545.1	ENSG00000007392.12	725	1.86	0	0	0.06
ENST00000495349.1	ENSG00000007392.12	1006	137.38	306.56	83.92	132.29
ENST00000266039.3	ENSG00000007402.7	5476	77.12	89.75	0	0
ENST00000360963.3	ENSG00000007402.7	5272	0	0	203.07	28.96
ENST00000395083.1	ENSG00000007402.7	5479	0	0	0	0
ENST00000423994.2	ENSG00000007402.7	5326	816.38	575.83	0	41.61
ENST00000424201.2	ENSG00000007402.7	5206	1966.21	1826.61	301.29	436.47
ENST00000429770.1	ENSG00000007402.7	5304	478.94	831.65	0	119.46
ENST00000435965.1	ENSG00000007402.7	5500	0	0	0	0
ENST00000479441.1	ENSG00000007402.7	3453	0	0	0	0
ENST00000483620.1	ENSG00000007402.7	2526	444.92	418.15	22.44	44.85
ENST00000487413.1	ENSG00000007402.7	1030	1.43	0	1.2	4.65
ENST00000324385.5	ENSG00000007516.9	4678	2124.16	3135.69	343.68	160.38
ENST00000397488.2	ENSG00000007516.9	4583	4845.86	3535.89	411.25	669.84
ENST00000397489.1	ENSG00000007516.9	4581	0	0	0	0
ENST00000421665.2	ENSG00000007516.9	3875	0	5.7	0	19.58
ENST00000426824.3	ENSG00000007516.9	3930	18.02	0	0	0
ENST00000561602.1	ENSG00000007516.9	622	15.9	11.63	3.18	6.6
ENST00000561793.1	ENSG00000007516.9	571	9.8	37.69	0	0
ENST00000562208.1	ENSG00000007516.9	3663	13.82	6.34	0	0
ENST00000564213.1	ENSG00000007516.9	334	0	0	16.76	4.98
ENST00000565665.1	ENSG00000007516.9	564	3.1	18.07	8.28	13.2
ENST00000566162.1	ENSG00000007516.9	699	0	11.44	0	0
ENST00000566389.1	ENSG00000007516.9	841	32.02	58.82	0	0
ENST00000567203.1	ENSG00000007516.9	539	15.5	11.67	3.06	4.05
ENST00000567825.1	ENSG00000007516.9	1409	4.65	0	0	0
ENST00000568198.1	ENSG00000007516.9	804	53.17	65.07	1.79	34.38
ENST00000568887.1	ENSG00000007516.9	3763	0	0	0	0
ENST00000007390.2	ENSG00000007520.3	1243	2324.36	2384.79	1959.99	2567.07
ENST00000566296.1	ENSG00000007520.3	649	61.64	106.21	47.01	99.93
ENST00000338863.7	ENSG00000007866.14	2983	309.65	255.12	1667.47	1783.29
ENST00000402886.3	ENSG00000007866.14	2729	8.14	25.97	0	71.71
ENST00000433586.1	ENSG00000007866.14	657	2.2	2.91	3.53	0
ENST00000294401.7	ENSG00000007923.11	2210	38.59	0	41.74	105.74
ENST00000349363.6	ENSG00000007923.11	1357	0	0	0	0
ENST00000377573.5	ENSG00000007923.11	1793	70.56	150.3	80.86	291.9
ENST00000377577.5	ENSG00000007923.11	3311	3657.43	3552.2	5115.53	5291.19
ENST00000426784.1	ENSG00000007923.11	975	0	0	20.41	11.72
ENST00000451196.1	ENSG00000007923.11	1357	0	0	0	0
ENST00000460594.1	ENSG00000007923.11	581	2.15	0	0	10.24
ENST00000465508.1	ENSG00000007923.11	3014	240.71	175.38	242.86	303.5
ENST00000465911.1	ENSG00000007923.11	745	5.3	0	0	4.13
ENST00000469318.1	ENSG00000007923.11	355	0	0	0	0
ENST00000472414.1	ENSG00000007923.11	725	19.69	25.11	12.54	22.14
ENST00000473993.1	ENSG00000007923.11	755	0	0	0	0
ENST00000485073.1	ENSG00000007923.11	613	49.56	51	96.06	59.44
ENST00000542246.1	ENSG00000007923.11	1961	0	0	0	0
ENST00000361729.2	ENSG00000007968.6	5191	7	7	2272.67	2445.18
ENST00000487237.1	ENSG00000007968.6	550	0	0	11.33	14.82
ENST00000262193.6	ENSG00000008018.8	928	4276.3	4175.78	9517.96	9831.04
ENST00000462957.1	ENSG00000008018.8	1939	253.7	265.22	535.04	522.96
ENST00000295987.7	ENSG00000008056.8	3203	19977.3	20312.7	37.25	89.02
ENST00000340666.4	ENSG00000008056.8	3165	18328.7	17104.3	137.75	59.98
ENST00000009105.1	ENSG00000008118.5	2612	157.83	221.34	0	0
ENST00000361322.2	ENSG00000008118.5	2440	3913.6	3673.66	83	88
ENST00000423146.1	ENSG00000008118.5	808	0	0	0	0
ENST00000494990.1	ENSG00000008118.5	573	5.56	0	0	0
ENST00000341426.5	ENSG00000008130.11	3235	992.64	846.98	1479.6	2132.74
ENST00000341991.3	ENSG00000008130.11	3098	716.56	722.07	1831.16	1282.35
ENST00000342348.5	ENSG00000008130.11	1789	195.73	258.4	751.66	851.76
ENST00000344463.4	ENSG00000008130.11	3663	1.6	0	0	0
ENST00000378625.1	ENSG00000008130.11	3653	27.89	0	60.83	106.11
ENST00000400922.2	ENSG00000008130.11	663	0	0	0	0
ENST00000460602.1	ENSG00000008130.11	974	30.74	29.16	67.5	78.19
ENST00000464373.1	ENSG00000008130.11	722	7.67	10.18	28.57	34
ENST00000469045.1	ENSG00000008130.11	890	11.68	0	32	67.59
ENST00000477235.1	ENSG00000008130.11	1004	40.12	53.87	252.84	265.14
ENST00000480499.1	ENSG00000008130.11	549	26.88	10.28	72.09	41.8
ENST00000480542.1	ENSG00000008130.11	341	0	0	2.8	0
ENST00000489538.1	ENSG00000008130.11	475	0	0	8.89	13.51
ENST00000492768.1	ENSG00000008130.11	859	47.87	5	224.25	137.39
ENST00000492845.2	ENSG00000008130.11	937	39.11	48.84	142.88	195.69
ENST00000497186.1	ENSG00000008130.11	683	8.61	0	22.75	8.87
ENST00000497615.1	ENSG00000008130.11	534	7.27	22.58	13.19	70.71
ENST00000497747.1	ENSG00000008130.11	467	30.61	5.55	72.43	37.96
ENST00000498806.1	ENSG00000008130.11	269	6.01	3.09	20.56	29.2
ENST00000263046.4	ENSG00000008196.8	5797	164.07	64.73	87.45	108.44
ENST00000344788.3	ENSG00000008196.8	797	0	0	0	5.56
ENST00000393655.3	ENSG00000008196.8	5773	250.93	387.05	0	0
ENST00000489228.1	ENSG00000008196.8	835	0	3.22	16.55	0
ENST00000265727.7	ENSG00000008277.10	2891	17.24	53.29	118.94	68.04
ENST00000315984.7	ENSG00000008277.10	3420	2.64	0	62.84	35.06
ENST00000398201.4	ENSG00000008277.10	2784	51.22	3.66	0	16.42
ENST00000398203.3	ENSG00000008277.10	2697	36	14.56	0	0
ENST00000398204.4	ENSG00000008277.10	9334	9685.36	10350.8	552.37	816.63
ENST00000398209.3	ENSG00000008277.10	9144	4391.27	6026.97	313.3	6.76
ENST00000412441.1	ENSG00000008277.10	726	0	5.08	10.27	8.16
ENST00000413139.1	ENSG00000008277.10	793	55.52	51.4	0	0
ENST00000426930.1	ENSG00000008277.10	1259	170.08	195.64	10.28	0
ENST00000439864.1	ENSG00000008277.10	2576	3.67	21.64	0	2.93
ENST00000476330.1	ENSG00000008277.10	613	16	11	2	2
ENST00000478920.1	ENSG00000008277.10	511	0	0	0	0
ENST00000011473.2	ENSG00000008282.3	2127	372.48	342.68	396.22	357.3
ENST00000455385.2	ENSG00000008282.3	2151	2110.51	2445.52	4256.72	4180.4
ENST00000460770.1	ENSG00000008282.3	545	109.32	110	308.34	310.06
ENST00000464029.1	ENSG00000008282.3	1017	0	0	31.17	9.68
ENST00000470347.1	ENSG00000008282.3	1193	18.67	60.8	232.56	175.55
ENST00000483448.1	ENSG00000008282.3	478	1.02	0	0	5.01
ENST00000360793.3	ENSG00000008283.11	3001	3142.26	2843.59	3800.4	4320.75
ENST00000392975.2	ENSG00000008283.11	3007	0	0	0	0
ENST00000392976.1	ENSG00000008283.11	3151	104.86	0	773.1	611.19
ENST00000448884.2	ENSG00000008283.11	1496	0	0	0	0
ENST00000542042.1	ENSG00000008283.11	1302	14.85	0	0	2.09
ENST00000577368.1	ENSG00000008283.11	753	11.8	8.94	91.23	79.32
ENST00000577989.1	ENSG00000008283.11	542	2.51	0	0	0
ENST00000578016.1	ENSG00000008283.11	530	0	0	0	0
ENST00000578072.1	ENSG00000008283.11	551	0	0	0	0
ENST00000580592.1	ENSG00000008283.11	481	0	0	0	0
ENST00000580691.1	ENSG00000008283.11	1127	0	0	0	0
ENST00000581163.1	ENSG00000008283.11	869	0	0	0	0
ENST00000581573.1	ENSG00000008283.11	2344	11.12	0	3.14	0
ENST00000582034.1	ENSG00000008283.11	1193	0	0	11.33	9.76
ENST00000582143.1	ENSG00000008283.11	578	6.95	8.34	53.8	78.27
ENST00000582297.1	ENSG00000008283.11	897	0	0	11.27	18.39
ENST00000582997.1	ENSG00000008283.11	877	0	0	0	0
ENST00000583478.1	ENSG00000008283.11	561	9.37	0	2.35	1.13
ENST00000584031.1	ENSG00000008283.11	3200	152.25	196.13	93.33	45.1
ENST00000584291.1	ENSG00000008283.11	848	0	0	0	0
ENST00000585153.1	ENSG00000008283.11	811	3.03	0	12.05	0
ENST00000358954.2	ENSG00000008311.10	3126	0.99	24.76	38.19	78.54
ENST00000393376.1	ENSG00000008311.10	3233	38.59	165.35	0	0
ENST00000417368.2	ENSG00000008311.10	3163	443.34	387.34	798.88	903.71
ENST00000426162.1	ENSG00000008311.10	722	0	1.38	3.46	2.59
ENST00000431170.1	ENSG00000008311.10	2922	32.25	0	121.91	26.29
ENST00000460376.1	ENSG00000008311.10	2331	84.25	79.34	109.28	150.23
ENST00000473553.1	ENSG00000008311.10	1816	136.59	176.84	122.28	39.64
ENST00000011684.7	ENSG00000008323.11	2881	0	0	287.37	294
ENST00000304581.8	ENSG00000008323.11	1424	0	0	14.37	10.76
ENST00000396988.3	ENSG00000008323.11	2963	0	0	0	0
ENST00000449001.2	ENSG00000008323.11	3111	0	0	0	0
ENST00000535616.1	ENSG00000008323.11	349	0	0	0	0
ENST00000536531.1	ENSG00000008323.11	1683	0	0	13.1	48.53
ENST00000538208.1	ENSG00000008323.11	404	0	0	0.7	0
ENST00000543000.1	ENSG00000008323.11	289	0	0	0	0
ENST00000544743.1	ENSG00000008323.11	256	0	0	2.46	3.71
ENST00000011691.4	ENSG00000008324.6	815	964.66	1171.93	956.45	970.97
ENST00000447630.1	ENSG00000008324.6	1047	72.86	45.84	15.25	34.36
ENST00000474941.1	ENSG00000008324.6	567	3.48	3.23	23.3	6.67
ENST00000262966.8	ENSG00000008382.11	1567	44.18	138.85	68.73	108.51
ENST00000359935.4	ENSG00000008382.11	1475	75.65	88.71	99.24	144.86
ENST00000594162.1	ENSG00000008382.11	407	18.39	18.48	20.09	3.29
ENST00000594716.1	ENSG00000008382.11	1547	21.43	30.26	9.66	21.71
ENST00000596722.1	ENSG00000008382.11	1578	0	0	0	0
ENST00000597036.1	ENSG00000008382.11	1445	18.46	125.3	77.58	12.29
ENST00000599840.1	ENSG00000008382.11	1611	1126.44	830.71	682.79	745.13
ENST00000601877.1	ENSG00000008382.11	379	22.45	60.69	61.92	24.2
ENST00000008527.5	ENSG00000008405.7	3267	2332.2	2358.46	2184.47	2161.39
ENST00000546722.1	ENSG00000008405.7	471	18.48	44.04	15.99	6.28
ENST00000549356.1	ENSG00000008405.7	621	23.45	37.48	3.61	28.4
ENST00000550633.1	ENSG00000008405.7	830	0	0	2.31	2.62
ENST00000552790.1	ENSG00000008405.7	3834	118.87	138.02	138.62	84.31
ENST00000358552.3	ENSG00000008441.12	5530	8450.34	7365.71	836.94	967.22
ENST00000360105.4	ENSG00000008441.12	5459	11171.1	12304.5	2976.57	3204.23
ENST00000397661.2	ENSG00000008441.12	3143	1628.11	1390.77	934.64	1072.93
ENST00000585382.1	ENSG00000008441.12	1083	36.94	15.82	0	0
ENST00000585575.1	ENSG00000008441.12	1485	0	0	0	0
ENST00000586797.1	ENSG00000008441.12	1615	313.55	408.5	0	6.49
ENST00000586873.1	ENSG00000008441.12	587	6.29	5.95	0	0
ENST00000587260.1	ENSG00000008441.12	1537	1403.93	1380.9	0	43.61
ENST00000587760.1	ENSG00000008441.12	1487	660.86	690.56	581.86	521.65
ENST00000588228.1	ENSG00000008441.12	1692	220.93	58.3	0	0
ENST00000588680.1	ENSG00000008441.12	319	0	0	0	0
ENST00000590027.1	ENSG00000008441.12	579	0	0	0	0
ENST00000591028.1	ENSG00000008441.12	582	5.91	0	0	1.86
ENST00000592199.1	ENSG00000008441.12	1509	0	0	0	0
ENST00000319914.5	ENSG00000008513.10	6967	27.99	0	240.76	72.4
ENST00000399640.2	ENSG00000008513.10	6316	1214.19	972.63	2611.81	2735.55
ENST00000517668.1	ENSG00000008513.10	665	0	0	0	0
ENST00000518298.1	ENSG00000008513.10	921	0	15.36	3.83	7.95
ENST00000519435.1	ENSG00000008513.10	1050	26.05	11.37	12.09	18.22
ENST00000519924.1	ENSG00000008513.10	684	0	0	8.1	34.21
ENST00000520020.1	ENSG00000008513.10	574	0	0	2.97	0
ENST00000521180.1	ENSG00000008513.10	6951	649.77	822.35	1676.14	2061.88
ENST00000521627.1	ENSG00000008513.10	454	0	3	3	1
ENST00000522204.1	ENSG00000008513.10	665	0	1.33	0	2.98
ENST00000522285.1	ENSG00000008513.10	393	0	2	8	7
ENST00000522652.1	ENSG00000008513.10	2580	0	0	0	0
ENST00000522873.1	ENSG00000008513.10	613	0	0	0	0
ENST00000523634.1	ENSG00000008513.10	895	0	0	0	0
ENST00000523854.1	ENSG00000008513.10	626	0	0	0	0
ENST00000523855.1	ENSG00000008513.10	741	0	4.96	11.29	13.82
ENST00000336577.4	ENSG00000008516.12	3554	41	52	194	212
ENST00000570755.1	ENSG00000008516.12	779	0	0	0	0
ENST00000575441.1	ENSG00000008516.12	710	0	0	0	0
ENST00000008876.5	ENSG00000008735.10	2566	24.91	68.72	0	0
ENST00000329492.3	ENSG00000008735.10	3358	15.85	0.75	0	0
ENST00000341339.4	ENSG00000008735.10	2221	5390.96	4954.9	79.12	83.56
ENST00000399908.2	ENSG00000008735.10	5595	9624.3	8704.59	122.08	194.96
ENST00000399912.1	ENSG00000008735.10	3380	6024.08	5393.74	93.6	41.41
ENST00000442429.2	ENSG00000008735.10	2527	4034.91	4919.29	99.2	155.06
ENST00000251822.6	ENSG00000008853.12	5451	1700.76	1652.34	505.01	459.15
ENST00000517528.1	ENSG00000008853.12	597	19.04	4.27	0	21.58
ENST00000518534.1	ENSG00000008853.12	402	4	0	2	1.24
ENST00000519210.1	ENSG00000008853.12	377	0	4.81	6.24	2.13
ENST00000519685.1	ENSG00000008853.12	3505	0	8.23	94.61	27.07
ENST00000522948.1	ENSG00000008853.12	4959	6002.2	6096.35	1457.13	1896.04
ENST00000523918.1	ENSG00000008853.12	576	0	0	0	0
ENST00000524077.1	ENSG00000008853.12	803	0	0	0	2.78
ENST00000233099.5	ENSG00000008869.7	6905	3841.06	4271.24	2369.81	2419.07
ENST00000354531.2	ENSG00000008869.7	6525	171.47	35.47	0	74.74
ENST00000425467.1	ENSG00000008869.7	433	0	0	0	1.23
ENST00000467978.1	ENSG00000008869.7	611	0	0	13.08	19.38
ENST00000471051.1	ENSG00000008869.7	836	3.9	0	0	0
ENST00000478810.1	ENSG00000008869.7	750	7.58	4.28	4.11	10.58
ENST00000337002.4	ENSG00000008952.12	6568	6690.99	8732.79	2378.58	2365.07
ENST00000460513.1	ENSG00000008952.12	641	0	8.26	0	5.32
ENST00000461933.1	ENSG00000008952.12	363	0	0	0	2
ENST00000469515.2	ENSG00000008952.12	785	0	9.71	8.06	0
ENST00000469890.1	ENSG00000008952.12	822	5.1	14.32	20.36	8.15
ENST00000470355.1	ENSG00000008952.12	370	0	0	4.6	0
ENST00000480708.1	ENSG00000008952.12	1430	4375.61	4195.05	2987.73	2977.18
ENST00000481435.1	ENSG00000008952.12	627	0	0	0	0
ENST00000487736.1	ENSG00000008952.12	508	8.73	19.74	2.81	13.85
ENST00000497277.1	ENSG00000008952.12	525	21.56	11.14	23.86	4.43
ENST00000261443.5	ENSG00000009307.11	3228	0	117.43	0	0
ENST00000339438.6	ENSG00000009307.11	4006	19745	21932.1	31590.5	29950
ENST00000358528.4	ENSG00000009307.11	4076	0	31.04	0	0
ENST00000369530.1	ENSG00000009307.11	3774	419.65	691.44	49.97	53.9
ENST00000438362.2	ENSG00000009307.11	4167	0	0	0	0
ENST00000483030.1	ENSG00000009307.11	873	51.37	60.97	372.57	335.51
ENST00000483407.1	ENSG00000009307.11	741	71.4	119.9	303.36	287.45
ENST00000524652.1	ENSG00000009307.11	562	2.67	0	9.85	19.65
ENST00000525132.1	ENSG00000009307.11	521	3.65	5.65	0	130.63
ENST00000525878.1	ENSG00000009307.11	626	0	0	0	5.5
ENST00000525970.1	ENSG00000009307.11	503	3.67	0	105.28	297.29
ENST00000529046.1	ENSG00000009307.11	571	0	0	0	14.1
ENST00000530784.1	ENSG00000009307.11	545	2.9	19.44	13.6	10.58
ENST00000530886.1	ENSG00000009307.11	3459	172.61	55.71	656.54	731.95
ENST00000533818.1	ENSG00000009307.11	552	0	0	0	0
ENST00000534389.1	ENSG00000009307.11	601	0	2.45	5.11	6.4
ENST00000534699.1	ENSG00000009307.11	2667	7720.06	6205.89	19503.2	19780
ENST00000375375.3	ENSG00000009709.7	2260	0	0	0	0
ENST00000400661.3	ENSG00000009709.7	1700	0	0	0.17	0
ENST00000420770.2	ENSG00000009709.7	5538	274	281	2.83	1
ENST00000400897.3	ENSG00000009724.12	2439	0	2	24.37	14.04
ENST00000400898.3	ENSG00000009724.12	726	5	0	24.67	29.77
ENST00000478645.1	ENSG00000009724.12	443	0	0	0	0
ENST00000480221.1	ENSG00000009724.12	2190	0	0	75.96	101.19
ENST00000010338.4	ENSG00000009790.10	1767	0	7.01	0	0
ENST00000367023.1	ENSG00000009790.10	1065	0	4.76	79.13	69.38
ENST00000367024.1	ENSG00000009790.10	2331	0	0	0	0
ENST00000367025.3	ENSG00000009790.10	2243	42.4	20.24	139.39	279.88
ENST00000367026.3	ENSG00000009790.10	2058	0	5.65	36.98	0
ENST00000400959.3	ENSG00000009790.10	1854	7.78	2.19	82.94	86.27
ENST00000460314.1	ENSG00000009790.10	2601	9.18	16.48	88.24	52.39
ENST00000467830.1	ENSG00000009790.10	748	0	0	10.4	11.21
ENST00000468672.1	ENSG00000009790.10	570	0	0	0	0
ENST00000471368.1	ENSG00000009790.10	551	0	0	2.37	3.12
ENST00000474496.1	ENSG00000009790.10	586	0	0	9.87	8.82
ENST00000476050.1	ENSG00000009790.10	3302	7.05	11.67	99.49	100.6
ENST00000477431.1	ENSG00000009790.10	791	0	0	0	0
ENST00000478359.1	ENSG00000009790.10	1860	0.59	0	56.31	5.25
ENST00000479796.1	ENSG00000009790.10	540	0	0	0	0
ENST00000480569.1	ENSG00000009790.10	467	0	0	0	0
ENST00000487271.1	ENSG00000009790.10	499	0	0	6.88	5.08
ENST00000488702.1	ENSG00000009790.10	566	0	0	0	0
ENST00000261534.4	ENSG00000009830.7	4876	1050.97	1195.77	935.73	1074.26
ENST00000452340.3	ENSG00000009830.7	5647	1010.51	876.22	522.22	548.92
ENST00000553863.1	ENSG00000009830.7	564	13.14	0	0	0
ENST00000553880.1	ENSG00000009830.7	555	4.89	7.74	0	3.1
ENST00000554564.1	ENSG00000009830.7	725	43.89	62.85	58.6	63.66
ENST00000554767.1	ENSG00000009830.7	5457	116.76	107.28	53.29	43.23
ENST00000554884.1	ENSG00000009830.7	549	1.54	0	0	1.5
ENST00000554948.1	ENSG00000009830.7	565	0	0	0	0
ENST00000555134.1	ENSG00000009830.7	873	45.72	57.22	141.36	97.49
ENST00000555675.1	ENSG00000009830.7	533	2.86	0	14.92	22.16
ENST00000555710.1	ENSG00000009830.7	575	0	0	0	0
ENST00000555788.1	ENSG00000009830.7	470	0	15.75	0	5.92
ENST00000556171.1	ENSG00000009830.7	580	8.97	0	22.91	0
ENST00000556326.1	ENSG00000009830.7	948	7.84	13.48	0	18.97
ENST00000556394.1	ENSG00000009830.7	693	25.3	36.26	71.98	98.08
ENST00000556404.1	ENSG00000009830.7	532	8.41	8.07	1.09	2.09
ENST00000556446.1	ENSG00000009830.7	556	0	0	2.51	1.61
ENST00000556851.1	ENSG00000009830.7	364	2.02	0	6.1	4.41
ENST00000556880.1	ENSG00000009830.7	681	8.83	0	3.16	1.67
ENST00000557289.1	ENSG00000009830.7	355	11.92	0	0	3.8
ENST00000557525.1	ENSG00000009830.7	556	1.21	0	6.64	0
ENST00000557675.1	ENSG00000009830.7	575	37.22	16.35	59.48	64.13
ENST00000602717.1	ENSG00000009830.7	662	0	0	0	0
ENST00000367621.1	ENSG00000009844.11	1284	1185.94	1189.42	1656.87	1832.49
ENST00000367630.4	ENSG00000009844.11	7028	1967.9	2413.09	1555.35	1445.83
ENST00000452973.2	ENSG00000009844.11	1383	34	12.98	79.33	71
ENST00000491881.1	ENSG00000009844.11	528	3.15	2.51	7.46	15.67
ENST00000313375.3	ENSG00000009950.11	3278	117.21	22.15	1045.11	919.56
ENST00000345114.5	ENSG00000009950.11	3079	1215.68	1036.26	18.91	160.6
ENST00000354613.1	ENSG00000009950.11	3215	0	0	0	0
ENST00000395189.1	ENSG00000009950.11	2999	871.14	1046.38	0	0
ENST00000414749.2	ENSG00000009950.11	3224	0	0	79.62	37.57
ENST00000429400.2	ENSG00000009950.11	3173	44.11	0	0	26.22
ENST00000434326.1	ENSG00000009950.11	3252	584.15	534.39	490.6	563.08
ENST00000453275.1	ENSG00000009950.11	690	49.2	17.99	0	7.51
ENST00000456640.1	ENSG00000009950.11	706	161.77	93.18	126.77	108.6
ENST00000467221.1	ENSG00000009950.11	774	193.81	164.48	91.06	75.11
ENST00000476404.1	ENSG00000009950.11	1921	115.65	166.22	22.88	38.12
ENST00000488212.1	ENSG00000009950.11	534	37.29	73.95	84.05	66.63
ENST00000339594.4	ENSG00000009954.6	6102	4900.8	5349.29	9803.25	9745.82
ENST00000404251.1	ENSG00000009954.6	5428	2138.2	1989.72	4742.4	4758.67
ENST00000466844.1	ENSG00000009954.6	827	0	16.99	40.35	38.51
ENST00000011619.3	ENSG00000010017.9	3113	3945.86	4296.42	3451.77	3208.27
ENST00000469916.1	ENSG00000010017.9	658	69.62	47.52	91.53	114.36
ENST00000539980.1	ENSG00000010017.9	1640	1358.52	1271.06	1460.71	1354.37
ENST00000008440.9	ENSG00000010072.11	1667	40.03	34.4	108.16	62.86
ENST00000295050.7	ENSG00000010072.11	3468	364.32	308.03	608.69	617.08
ENST00000366644.3	ENSG00000010072.11	795	0	0	0	0
ENST00000391858.4	ENSG00000010072.11	3559	15.49	28.57	41.94	42.62
ENST00000469904.1	ENSG00000010072.11	662	17.16	0	117.49	70.44
ENST00000492437.1	ENSG00000010072.11	603	0	0	15.73	0
ENST00000203407.5	ENSG00000010256.6	1985	5814.23	4650.34	5303.81	6016.82
ENST00000412343.1	ENSG00000010256.6	778	176.86	400.83	336.67	244.01
ENST00000415995.1	ENSG00000010256.6	1387	4100.05	4038.18	4000.83	4201.25
ENST00000460105.1	ENSG00000010256.6	622	71.98	296.59	115.91	123.45
ENST00000463708.1	ENSG00000010256.6	739	6.7	1.3	3.94	2.77
ENST00000467690.1	ENSG00000010256.6	931	10.31	22.9	6.8	20.48
ENST00000471189.1	ENSG00000010256.6	955	385.92	408.73	192.26	264.92
ENST00000472438.1	ENSG00000010256.6	477	202.68	245.02	557.58	540.83
ENST00000480561.1	ENSG00000010256.6	1014	283.27	273.1	190.2	154.46
ENST00000493806.1	ENSG00000010256.6	567	0	0	0	1
ENST00000009041.7	ENSG00000010270.9	1728	1024.07	774.07	275.84	562.41
ENST00000396013.1	ENSG00000010270.9	1365	535.42	459.98	938.68	884.21
ENST00000429075.1	ENSG00000010270.9	857	0	0	34.76	0
ENST00000434197.1	ENSG00000010270.9	1341	619.96	608.88	320.76	435.33
ENST00000440144.1	ENSG00000010270.9	784	0	0	10.76	6.35
ENST00000453225.1	ENSG00000010270.9	859	19.18	23.18	37.66	14.94
ENST00000471550.1	ENSG00000010270.9	3653	185.34	200.86	44.39	54.71
ENST00000544203.1	ENSG00000010270.9	1664	353.03	701.02	582.15	312.04
ENST00000009180.4	ENSG00000010278.7	1169	4891.06	4961.44	5568.35	5852.82
ENST00000382515.2	ENSG00000010278.7	1229	274.8	254.98	30.02	0
ENST00000382518.1	ENSG00000010278.7	1554	22.16	22.2	18.12	4.51
ENST00000382519.4	ENSG00000010278.7	800	898.52	904.79	1293.97	1288.73
ENST00000481267.1	ENSG00000010278.7	1280	5.04	0	0	0
ENST00000536586.1	ENSG00000010278.7	739	196.88	225.32	160.53	272.28
ENST00000538418.1	ENSG00000010278.7	441	7.53	0	7.28	9.96
ENST00000538834.1	ENSG00000010278.7	564	0	0	0	4.43
ENST00000540891.1	ENSG00000010278.7	642	10.67	0	0	4.14
ENST00000543916.1	ENSG00000010278.7	969	6.16	23.69	13.6	14.82
ENST00000546073.1	ENSG00000010278.7	1072	13.18	14.58	23.11	7.3
ENST00000336604.4	ENSG00000010295.15	2686	0	0	297.18	0
ENST00000356896.4	ENSG00000010295.15	2680	393.58	330.83	0	425.74
ENST00000396830.2	ENSG00000010295.15	1776	1438.41	1036.79	349.41	510.43
ENST00000396840.2	ENSG00000010295.15	2677	1419.83	1452.83	538.58	471.57
ENST00000436152.2	ENSG00000010295.15	3101	0	0	9.72	24.23
ENST00000465801.1	ENSG00000010295.15	2850	77.51	50.01	0	15.5
ENST00000471408.1	ENSG00000010295.15	2843	76.71	74.27	7.81	29.6
ENST00000472558.2	ENSG00000010295.15	2571	60.78	135.39	132.43	77.46
ENST00000487279.2	ENSG00000010295.15	2786	36.77	105.73	0	0
ENST00000488007.1	ENSG00000010295.15	3001	240.41	190.16	522.87	549.48
ENST00000327906.3	ENSG00000010318.15	2130	74.89	114.89	150.15	243.37
ENST00000347025.2	ENSG00000010318.15	1472	7.04	0	9.59	2.26
ENST00000459935.1	ENSG00000010318.15	790	1.34	7.33	4.41	2.93
ENST00000461861.1	ENSG00000010318.15	1303	0	0	0	4.09
ENST00000465863.1	ENSG00000010318.15	494	0	0	0	5.03
ENST00000472337.1	ENSG00000010318.15	387	0	0	0	0
ENST00000473145.1	ENSG00000010318.15	962	96.5	96.1	197.38	203.86
ENST00000482327.1	ENSG00000010318.15	576	149.57	87.01	149.74	124.02
ENST00000498509.2	ENSG00000010318.15	1727	1.66	6.67	16.72	33.44
ENST00000231721.2	ENSG00000010319.2	4899	2641.33	2429.3	664.43	644.1
ENST00000465657.1	ENSG00000010319.2	848	0	0	0	0
ENST00000475739.1	ENSG00000010319.2	616	16.67	28.7	4.57	7.9
ENST00000345716.4	ENSG00000010322.11	5238	4914	2918.19	78.02	311.83
ENST00000420808.2	ENSG00000010322.11	2589	1890.04	2153.34	630.69	586.5
ENST00000460759.1	ENSG00000010322.11	565	216.05	253.43	48.56	51.15
ENST00000464280.1	ENSG00000010322.11	833	25.15	5.48	0	8.75
ENST00000467594.1	ENSG00000010322.11	1014	271.92	212.53	135.29	156.23
ENST00000474188.1	ENSG00000010322.11	564	23.85	37.31	29.06	22.02
ENST00000479054.1	ENSG00000010322.11	5173	18145.2	19585.3	4325.61	4502.8
ENST00000481211.1	ENSG00000010322.11	557	34.42	41.24	17.77	18.34
ENST00000485765.1	ENSG00000010322.11	563	5.38	2.89	2.51	0
ENST00000488157.1	ENSG00000010322.11	590	3.28	2.27	1.1	2.22
ENST00000488243.1	ENSG00000010322.11	584	3.62	0	0	1.9
ENST00000488380.1	ENSG00000010322.11	3168	2534.7	2571.75	795.93	910.42
ENST00000489895.1	ENSG00000010322.11	5350	554.41	351.3	192.45	248.84
ENST00000490425.1	ENSG00000010322.11	559	0	0	0	0
ENST00000321725.6	ENSG00000010327.6	7928	1226.05	1012.66	23.74	24.01
ENST00000461325.1	ENSG00000010327.6	2557	55.31	63.82	0	0
ENST00000462681.1	ENSG00000010327.6	1499	39.01	19.93	2.3	3.8
ENST00000462741.1	ENSG00000010327.6	2160	245.12	191.82	27.55	9.7
ENST00000469989.1	ENSG00000010327.6	671	86.8	149.09	5.36	1.88
ENST00000479355.1	ENSG00000010327.6	588	17.42	16.36	0	0
ENST00000481607.1	ENSG00000010327.6	2474	0	0	0	0
ENST00000481626.1	ENSG00000010327.6	2513	38.3	24.32	8.05	2.57
ENST00000484850.1	ENSG00000010327.6	420	0	0	0	0.03
ENST00000313777.4	ENSG00000010361.9	1675	556.41	443.31	13.75	159.91
ENST00000377092.4	ENSG00000010361.9	1632	248.58	215.49	215.64	213.2
ENST00000445575.2	ENSG00000010361.9	1368	24.48	35.78	147.5	154.59
ENST00000525130.1	ENSG00000010361.9	1538	108.87	244.35	24.32	51.83
ENST00000525370.1	ENSG00000010361.9	1483	0	0	7.42	7.03
ENST00000525800.1	ENSG00000010361.9	584	47.25	31.54	8.92	10.01
ENST00000526435.1	ENSG00000010361.9	584	20.04	3.49	6.14	3.36
ENST00000526575.1	ENSG00000010361.9	482	0	0	0	0
ENST00000527111.1	ENSG00000010361.9	681	68.11	55.65	13.16	13.58
ENST00000527585.1	ENSG00000010361.9	550	43.55	41.19	33.44	65.67
ENST00000527973.1	ENSG00000010361.9	573	11.62	35.83	3.78	0
ENST00000528043.1	ENSG00000010361.9	703	7.09	0	13.13	0
ENST00000528094.1	ENSG00000010361.9	1479	117.19	15.36	12.32	8.11
ENST00000529302.1	ENSG00000010361.9	572	0	0	0	0
ENST00000529634.2	ENSG00000010361.9	679	9.26	5.52	10.8	17.44
ENST00000531017.1	ENSG00000010361.9	1022	61.29	76.79	56.28	45.53
ENST00000533418.1	ENSG00000010361.9	1524	281.4	262.98	233.05	154.39
ENST00000534008.1	ENSG00000010361.9	649	20.88	0	0	2.99
ENST00000534138.1	ENSG00000010361.9	540	14.97	23.73	17.35	11.34
ENST00000396868.3	ENSG00000010539.7	3082	136.76	0	57.9	95.1
ENST00000396870.4	ENSG00000010539.7	2373	40.32	94.49	499.63	407.46
ENST00000396871.4	ENSG00000010539.7	3162	0	58.97	0	0
ENST00000414144.2	ENSG00000010539.7	3306	101.56	59.67	298.58	296.24
ENST00000431561.3	ENSG00000010539.7	3348	153.19	272.95	75.33	196.11
ENST00000575285.1	ENSG00000010539.7	4308	35.4	6.63	62.07	57.01
ENST00000575617.1	ENSG00000010539.7	713	0	0	0	0
ENST00000575630.1	ENSG00000010539.7	896	9.04	30.41	15.13	29.69
ENST00000575948.1	ENSG00000010539.7	1350	64.73	27.88	197.36	69.55
ENST00000577015.1	ENSG00000010539.7	637	0	0	0	2.85
ENST00000011653.4	ENSG00000010610.5	3114	899.48	833.61	641.42	696.35
ENST00000437800.2	ENSG00000010610.5	2117	2.93	2.38	16.12	11.38
ENST00000535466.1	ENSG00000010610.5	588	0	0	0	0
ENST00000535707.1	ENSG00000010610.5	577	0	0	0	0
ENST00000536563.1	ENSG00000010610.5	593	0	0	0	0
ENST00000536590.1	ENSG00000010610.5	561	0	0	0	0
ENST00000536610.1	ENSG00000010610.5	608	0	0	0	0
ENST00000538827.1	ENSG00000010610.5	985	0	0	6.94	24.31
ENST00000539492.1	ENSG00000010610.5	579	0	0	0	0
ENST00000541982.1	ENSG00000010610.5	1187	8.85	7.05	15.22	0
ENST00000543755.1	ENSG00000010610.5	494	4.3	0	0	0
ENST00000544344.1	ENSG00000010610.5	1056	4.44	4.95	8.3	1.95
ENST00000308731.7	ENSG00000010671.11	2579	126.53	160.54	1331.37	1243.17
ENST00000372880.1	ENSG00000010671.11	2203	0	0	0	5.57
ENST00000464006.1	ENSG00000010671.11	305	0	0	0	0
ENST00000464567.1	ENSG00000010671.11	587	0	0	0	0
ENST00000470069.1	ENSG00000010671.11	424	0	0	0	7.78
ENST00000470329.1	ENSG00000010671.11	572	0	0	7.38	1.58
ENST00000478995.1	ENSG00000010671.11	705	1.47	7	24.73	27.4
ENST00000488970.1	ENSG00000010671.11	385	0	5.46	10.53	28.5
ENST00000309234.6	ENSG00000010704.14	1158	0	0	81.74	46.51
ENST00000317896.7	ENSG00000010704.14	1922	0	10.45	58.52	62.12
ENST00000336625.8	ENSG00000010704.14	804	0	0	0	0
ENST00000349999.4	ENSG00000010704.14	1704	12.91	6.61	106.15	59.75
ENST00000352392.4	ENSG00000010704.14	653	0	0	0	2.57
ENST00000353147.5	ENSG00000010704.14	809	4.7	0	0	0
ENST00000357618.5	ENSG00000010704.14	5286	114.75	92.87	478.46	421.37
ENST00000397022.3	ENSG00000010704.14	1280	0	2.71	0	0
ENST00000461397.1	ENSG00000010704.14	1045	0	0	0.06	37.44
ENST00000470149.1	ENSG00000010704.14	1123	0	0	0	0
ENST00000483782.1	ENSG00000010704.14	1245	11.5	0	16.73	27.89
ENST00000485729.1	ENSG00000010704.14	777	19.14	0.26	36.29	39.85
ENST00000486147.1	ENSG00000010704.14	987	0	0	15.06	19.49
ENST00000488199.1	ENSG00000010704.14	781	0	5.11	0	0
ENST00000326197.7	ENSG00000010803.12	3275	368.86	565.35	633.51	581.68
ENST00000337495.5	ENSG00000010803.12	3108	676.94	432.34	1073.63	677.17
ENST00000361191.5	ENSG00000010803.12	2906	297.57	181.02	253.23	476.23
ENST00000361705.3	ENSG00000010803.12	3115	0	0	0	0
ENST00000372595.1	ENSG00000010803.12	3231	53.93	0	129.46	200.1
ENST00000372596.1	ENSG00000010803.12	3323	481.96	307.58	145.49	234.4
ENST00000372597.1	ENSG00000010803.12	3252	129.68	294.15	305.42	345.09
ENST00000397171.2	ENSG00000010803.12	3186	0	0	0	0
ENST00000397174.2	ENSG00000010803.12	3280	0	0	0	0
ENST00000402904.2	ENSG00000010803.12	3346	11.57	0.04	158.11	427.82
ENST00000456518.2	ENSG00000010803.12	2640	30.9	302.45	0	38.86
ENST00000460215.1	ENSG00000010803.12	447	0	0	5.15	8.67
ENST00000472037.1	ENSG00000010803.12	735	0	0	31.29	14.86
ENST00000482530.1	ENSG00000010803.12	574	0.62	0	58.56	46.19
ENST00000488592.1	ENSG00000010803.12	363	6.43	1.34	8.03	8.88
ENST00000489421.1	ENSG00000010803.12	687	2.32	0	16.82	29.59
ENST00000498793.1	ENSG00000010803.12	583	6.22	21.71	34.31	26.47
ENST00000229470.5	ENSG00000010810.13	2482	0	0	0	0
ENST00000229471.4	ENSG00000010810.13	2009	0	0	0	0
ENST00000354650.3	ENSG00000010810.13	3628	2264.05	2385.8	365.75	279.73
ENST00000356013.2	ENSG00000010810.13	2473	37.23	230.59	66.69	75.23
ENST00000368667.2	ENSG00000010810.13	2416	5623.62	5200.05	391.85	590.32
ENST00000368678.4	ENSG00000010810.13	2573	9.01	0	0	0
ENST00000368682.3	ENSG00000010810.13	3234	0	0	0	0
ENST00000462598.3	ENSG00000010810.13	825	0	0	4.5	2.21
ENST00000462856.2	ENSG00000010810.13	989	0	0	0	0
ENST00000467899.1	ENSG00000010810.13	642	6.29	4.04	0	2.12
ENST00000467921.2	ENSG00000010810.13	799	418.36	580.21	280.71	162.96
ENST00000471959.2	ENSG00000010810.13	932	25.91	18.79	9.63	11.78
ENST00000476769.2	ENSG00000010810.13	793	0	8.17	86.39	16.17
ENST00000484067.2	ENSG00000010810.13	712	180.75	142.32	80.18	119.61
ENST00000487824.2	ENSG00000010810.13	518	13.53	17.08	0	0
ENST00000491885.2	ENSG00000010810.13	649	0	0	0	0
ENST00000495927.1	ENSG00000010810.13	755	20.65	17.77	10	14.5
ENST00000495935.1	ENSG00000010810.13	436	38.95	23.82	19.8	26.24
ENST00000496864.2	ENSG00000010810.13	839	359.75	431.67	340.66	329.26
ENST00000517419.1	ENSG00000010810.13	610	0	0	0	0
ENST00000518295.1	ENSG00000010810.13	1012	0	21.05	0	7.65
ENST00000518630.1	ENSG00000010810.13	571	0	0	55.92	0
ENST00000520518.1	ENSG00000010810.13	864	31.8	66.49	24.58	37.76
ENST00000521062.1	ENSG00000010810.13	609	0	5.56	0	0
ENST00000521361.1	ENSG00000010810.13	723	4.05	0	0	0
ENST00000523238.1	ENSG00000010810.13	1012	35.58	58.41	47.69	91.15
ENST00000523322.1	ENSG00000010810.13	909	0	0	0	0
ENST00000523570.1	ENSG00000010810.13	597	0	0	0	0
ENST00000523574.1	ENSG00000010810.13	569	0	0	0	0
ENST00000524310.1	ENSG00000010810.13	541	0	0	0	0
ENST00000538466.1	ENSG00000010810.13	2061	1391.47	1293.18	1785.66	2013.32
ENST00000012134.2	ENSG00000010818.4	9524	4259.48	5758.7	1305.48	1224.42
ENST00000367603.2	ENSG00000010818.4	9723	374.78	0	187.48	187.41
ENST00000367604.1	ENSG00000010818.4	9621	6744.74	5689.61	1159.03	1246.17
ENST00000474532.1	ENSG00000010818.4	258	0	4.69	0	0
ENST00000418390.2	ENSG00000011007.8	5154	2688.19	2804.27	2644.2	2507.12
ENST00000487554.1	ENSG00000011007.8	501	0	2.73	3.66	7.73
ENST00000609199.1	ENSG00000011007.8	2671	169.81	0	2694.14	2760.15
ENST00000374501.1	ENSG00000011009.6	1117	279.61	403.19	724.9	795.67
ENST00000374502.3	ENSG00000011009.6	1072	72.55	100.62	182.3	311.21
ENST00000374503.3	ENSG00000011009.6	868	0	71.17	146.86	105.47
ENST00000374505.2	ENSG00000011009.6	907	0	0	0	0
ENST00000374514.3	ENSG00000011009.6	1810	1275.21	893.47	2092.9	2805.97
ENST00000400061.1	ENSG00000011009.6	1548	218.79	211.05	354.5	35.93
ENST00000420982.1	ENSG00000011009.6	614	0	4.53	49.43	40.11
ENST00000421070.1	ENSG00000011009.6	429	14.11	1.82	11.54	31.61
ENST00000472213.1	ENSG00000011009.6	822	56.72	29.14	32.58	6.91
ENST00000492577.1	ENSG00000011009.6	717	0	0	0	0
ENST00000495365.1	ENSG00000011009.6	842	0	0	0	21.12
ENST00000230671.2	ENSG00000011083.4	3739	5657.05	5335.96	28	14
ENST00000513403.1	ENSG00000011083.4	587	157.08	88.81	0	0
ENST00000524041.1	ENSG00000011083.4	2431	17.87	10.23	0	0
ENST00000298896.3	ENSG00000011114.10	2621	49.6	74.99	205.35	66.77
ENST00000334746.5	ENSG00000011114.10	8430	728.52	597.66	1557.43	1561.73
ENST00000355125.3	ENSG00000011114.10	6822	402.63	538.96	291.4	265.49
ENST00000393170.2	ENSG00000011114.10	2479	14.39	17.55	0	0
ENST00000553975.1	ENSG00000011114.10	2479	14.39	17.55	0	0
ENST00000554565.1	ENSG00000011114.10	2697	0	38.8	106.66	266.58
ENST00000554644.1	ENSG00000011114.10	2891	13.45	0	16.17	24.68
ENST00000554968.1	ENSG00000011114.10	316	0	6.75	0	0.63
ENST00000555525.1	ENSG00000011114.10	2328	0	46.74	0	99.11
ENST00000313863.6	ENSG00000011143.12	2091	26.99	0	277.62	431.33
ENST00000337050.7	ENSG00000011143.12	1576	0	0	0	0
ENST00000393119.2	ENSG00000011143.12	2392	514.17	489.72	970.95	1009.78
ENST00000393120.2	ENSG00000011143.12	1926	3.03	26.64	49.93	38.42
ENST00000537529.2	ENSG00000011143.12	2083	0	0	0	0
ENST00000546108.1	ENSG00000011143.12	1926	3.03	26.64	49.93	38.42
ENST00000577315.1	ENSG00000011143.12	495	11.58	5.19	5	15.37
ENST00000577824.1	ENSG00000011143.12	1158	46.03	19.74	82.51	17.63
ENST00000578789.1	ENSG00000011143.12	568	0	0	0	0
ENST00000579358.1	ENSG00000011143.12	567	20.16	24.17	16.02	23.31
ENST00000580127.1	ENSG00000011143.12	843	0	6.53	21.69	41.03
ENST00000581180.1	ENSG00000011143.12	899	19.8	9.46	29.2	50.13
ENST00000581761.1	ENSG00000011143.12	812	0	4.35	20.13	17.64
ENST00000583577.1	ENSG00000011143.12	697	46.92	26.32	50.24	74.98
ENST00000585134.1	ENSG00000011143.12	824	61.31	39.22	75.8	193.96
ENST00000013894.2	ENSG00000011198.3	833	0	0	0	4.08
ENST00000413300.1	ENSG00000011198.3	525	0	0	0	8.05
ENST00000454293.1	ENSG00000011198.3	464	1.04	0	1.28	2.33
ENST00000456453.1	ENSG00000011198.3	876	0	0	3.53	1.77
ENST00000458276.2	ENSG00000011198.3	1690	616.04	630.98	1059.36	1126.65
ENST00000463153.1	ENSG00000011198.3	631	19.92	2.02	11.67	20.23
ENST00000486764.1	ENSG00000011198.3	618	0	0	2.17	6.89
ENST00000262648.3	ENSG00000011201.6	6314	1182.5	1189.49	373.45	322.71
ENST00000481896.1	ENSG00000011201.6	797	0	0	0	0
ENST00000488294.1	ENSG00000011201.6	704	1.5	6.51	17.55	10.29
ENST00000397410.5	ENSG00000011243.13	2146	4355.35	4780.73	3826.59	4102
ENST00000593845.1	ENSG00000011243.13	2749	1447.9	463.33	264.88	321.63
ENST00000594594.2	ENSG00000011243.13	2251	99.97	75.94	46.66	35.81
ENST00000594893.1	ENSG00000011243.13	1453	768.77	529.78	382.09	429.62
ENST00000595067.1	ENSG00000011243.13	548	0	0	0	0
ENST00000595087.1	ENSG00000011243.13	796	903.78	828.99	306.16	388.01
ENST00000595136.1	ENSG00000011243.13	531	0	0	0	3.54
ENST00000595465.2	ENSG00000011243.13	1933	232.5	277.04	71.69	149.41
ENST00000595879.1	ENSG00000011243.13	790	49.27	18.74	0	34.67
ENST00000596195.1	ENSG00000011243.13	553	14.07	0	0	0
ENST00000596213.1	ENSG00000011243.13	929	59.51	72.23	95.15	115.9
ENST00000596750.2	ENSG00000011243.13	906	354.52	500.56	212.6	274.83
ENST00000597994.1	ENSG00000011243.13	470	0	0	0	0
ENST00000598292.1	ENSG00000011243.13	689	15.81	10.19	1.5	8.61
ENST00000599137.1	ENSG00000011243.13	608	2.34	24.15	6.46	14.98
ENST00000599488.1	ENSG00000011243.13	514	0	0	10.27	0
ENST00000600065.1	ENSG00000011243.13	679	49.86	22.2	31.38	18.61
ENST00000600247.1	ENSG00000011243.13	583	0	0	0	0
ENST00000601147.2	ENSG00000011243.13	583	33.8	11.94	13.48	12.66
ENST00000609519.1	ENSG00000011243.13	2113	839.56	932.17	514.09	655.71
ENST00000225298.7	ENSG00000011260.9	1894	2092.15	2182.27	4346.28	4547.16
ENST00000508506.3	ENSG00000011260.9	592	0	0	9.51	4.94
ENST00000579261.2	ENSG00000011260.9	567	0	0	4.11	3.95
ENST00000582150.1	ENSG00000011260.9	897	30.65	28.03	27.29	32.3
ENST00000582832.1	ENSG00000011260.9	464	0	0	0	5.39
ENST00000583205.1	ENSG00000011260.9	664	0	0	33.89	26.86
ENST00000583725.1	ENSG00000011260.9	577	44.2	62.69	51.92	65.4
ENST00000355526.4	ENSG00000011332.15	1632	209.46	0	37.58	84.1
ENST00000412732.1	ENSG00000011332.15	2303	1116.44	1362.57	21.53	145.95
ENST00000414789.1	ENSG00000011332.15	1960	116.54	38.12	0	0
ENST00000416611.1	ENSG00000011332.15	2341	430.95	197.66	65.35	0
ENST00000418517.1	ENSG00000011332.15	1608	0	0	0	0
ENST00000420980.2	ENSG00000011332.15	2227	59.8	0	32.31	40.3
ENST00000438060.1	ENSG00000011332.15	973	32.01	78.12	38.69	0
ENST00000438365.1	ENSG00000011332.15	523	0	0	0	0
ENST00000456296.1	ENSG00000011332.15	1562	240.93	157.2	0	0
ENST00000471976.1	ENSG00000011332.15	1567	154.93	169.25	82.73	14.75
ENST00000472656.1	ENSG00000011332.15	680	33.9	7.89	0	2.33
ENST00000473716.1	ENSG00000011332.15	2299	14.06	6.24	8.04	11.52
ENST00000475938.1	ENSG00000011332.15	1069	0	47.85	0	7.92
ENST00000488378.1	ENSG00000011332.15	480	8.5	16.79	1.06	1.13
ENST00000494031.1	ENSG00000011332.15	542	5.48	9.31	19.71	0
ENST00000586624.1	ENSG00000011332.15	428	0	0	0	0
ENST00000265537.3	ENSG00000011376.5	4281	2108.42	2047.57	3453.49	3373.56
ENST00000414984.1	ENSG00000011376.5	2800	0	0	0	0
ENST00000415258.1	ENSG00000011376.5	4744	274.42	263.42	268.58	403.78
ENST00000430399.1	ENSG00000011376.5	566	0	0	0	0
ENST00000431023.1	ENSG00000011376.5	570	0	0	0	0
ENST00000467936.1	ENSG00000011376.5	804	0	0	30.95	13.07
ENST00000474585.1	ENSG00000011376.5	567	4.63	10.01	4.98	9.75
ENST00000485461.1	ENSG00000011376.5	580	3.53	0	0	9.84
ENST00000265748.2	ENSG00000011426.6	4787	6342.95	7765.68	8686.37	8294.99
ENST00000396068.2	ENSG00000011426.6	4661	2531.44	1867.96	2631.66	2897.84
ENST00000418118.1	ENSG00000011426.6	463	0	0	0	0
ENST00000424865.1	ENSG00000011426.6	596	0	0	0	0
ENST00000428612.1	ENSG00000011426.6	707	162.25	154.53	0	0
ENST00000429082.1	ENSG00000011426.6	557	0	11.71	17.71	0
ENST00000441696.1	ENSG00000011426.6	716	29.56	0	0	28.13
ENST00000446635.1	ENSG00000011426.6	829	382.09	333.3	105.11	114.95
ENST00000452877.1	ENSG00000011426.6	580	13.93	40.09	14.4	12.84
ENST00000457743.1	ENSG00000011426.6	757	72.28	80.27	59.66	45.86
ENST00000460598.1	ENSG00000011426.6	569	0	0	0	5.04
ENST00000491782.1	ENSG00000011426.6	2078	148.43	72.72	70.09	101.46
ENST00000495714.1	ENSG00000011426.6	607	178.06	147.74	0	46.89
ENST00000263381.7	ENSG00000011451.13	4152	423.82	260.89	17.89	104.77
ENST00000389282.4	ENSG00000011451.13	6738	348.29	210.35	126.96	143.9
ENST00000545156.1	ENSG00000011451.13	3311	549.84	259.05	911.64	1040.57
ENST00000595214.2	ENSG00000011451.13	1005	16.04	0	13.11	5.56
ENST00000596159.1	ENSG00000011451.13	603	0	0	0	0
ENST00000599686.3	ENSG00000011451.13	3644	2089.94	2186.09	3487.82	3840.47
ENST00000599910.2	ENSG00000011451.13	4609	1031.81	978.54	980.02	925.93
ENST00000600632.1	ENSG00000011451.13	546	11.26	2.08	20.55	12.8
ENST00000052754.5	ENSG00000011465.12	2392	322.71	241.41	1233.63	1505.77
ENST00000228329.5	ENSG00000011465.12	1960	0	0	0	0
ENST00000303320.3	ENSG00000011465.12	1726	0	0	0	0
ENST00000393155.1	ENSG00000011465.12	2133	15.51	1063.09	0	0
ENST00000420120.2	ENSG00000011465.12	753	0	9.24	121.82	0
ENST00000425043.1	ENSG00000011465.12	1438	0	0	0	0
ENST00000441303.2	ENSG00000011465.12	519	0	0	0	0
ENST00000456569.2	ENSG00000011465.12	228	0	0	0	0
ENST00000546370.1	ENSG00000011465.12	586	0	0	1.2	0
ENST00000546391.1	ENSG00000011465.12	716	0	0	0	0
ENST00000546745.1	ENSG00000011465.12	1026	3.8	7.29	0	19.84
ENST00000547568.2	ENSG00000011465.12	823	240.13	263.61	614.09	691.34
ENST00000547937.1	ENSG00000011465.12	750	11.59	0	0	0
ENST00000548218.1	ENSG00000011465.12	356	3.69	1.66	0	2.44
ENST00000548768.1	ENSG00000011465.12	568	0	0	4.02	0
ENST00000549513.1	ENSG00000011465.12	920	0	0	1.43	0
ENST00000550099.1	ENSG00000011465.12	719	0	0	3.48	0
ENST00000550563.1	ENSG00000011465.12	593	214.46	144.8	474.07	459.09
ENST00000550758.1	ENSG00000011465.12	1064	3.19	11.56	8.52	14.62
ENST00000551354.1	ENSG00000011465.12	2924	17.45	5.36	18.54	28.85
ENST00000552145.1	ENSG00000011465.12	648	0	12.4	0	12.79
ENST00000552962.1	ENSG00000011465.12	1930	2583.48	1709.58	1565.2	1586.26
ENST00000012049.5	ENSG00000011478.7	2310	556.95	654.64	1323.23	1397.49
ENST00000366382.4	ENSG00000011478.7	1814	71.63	0	67.88	32.9
ENST00000591606.1	ENSG00000011478.7	561	20.42	6.36	34.44	21.23
ENST00000592769.1	ENSG00000011478.7	365	0	0	4.44	1.38
ENST00000012443.4	ENSG00000011485.10	2109	4528.01	4643.24	4226.79	4742.05
ENST00000391919.1	ENSG00000011485.10	1929	584.09	493.19	328.17	271.22
ENST00000467502.2	ENSG00000011485.10	1235	68.12	34.12	50.83	40.89
ENST00000467902.2	ENSG00000011485.10	399	17.14	9.11	50.73	30.98
ENST00000478046.1	ENSG00000011485.10	1886	30.41	4.98	104.85	96.29
ENST00000486994.1	ENSG00000011485.10	2209	69.61	38.2	0	0
ENST00000487483.2	ENSG00000011485.10	4675	290.16	336.19	182.15	312.33
ENST00000491003.1	ENSG00000011485.10	878	133.32	0	228.61	127.27
ENST00000492109.2	ENSG00000011485.10	848	11.38	18.47	83.29	92.91
ENST00000493347.1	ENSG00000011485.10	431	65.84	59.81	0	90.68
ENST00000525507.1	ENSG00000011485.10	1300	20.58	6.24	41.95	22.52
ENST00000527193.1	ENSG00000011485.10	548	0	0	17.03	8.33
ENST00000527623.1	ENSG00000011485.10	1215	0	0	9.83	1.85
ENST00000532058.1	ENSG00000011485.10	1970	135.75	100.27	216.39	119.93
ENST00000595055.1	ENSG00000011485.10	556	16.6	46.18	36.39	34.76
ENST00000260569.4	ENSG00000011523.9	5343	0	0	0	15.29
ENST00000377990.2	ENSG00000011523.9	5847	3988.66	4406.86	1209.25	1119.79
ENST00000475851.1	ENSG00000011523.9	550	0	0	0	2.02
ENST00000497039.1	ENSG00000011523.9	2355	29.69	40.51	16.4	19.22
ENST00000537589.1	ENSG00000011523.9	3768	93.99	110.64	91.19	20.96
ENST00000546106.1	ENSG00000011523.9	2308	21.66	0	298.17	374.71
ENST00000262629.4	ENSG00000011600.7	568	525.21	343.04	19.27	25.91
ENST00000424586.3	ENSG00000011600.7	541	23.19	56.78	0	0
ENST00000544690.2	ENSG00000011600.7	522	83.84	9.68	0	4.52
ENST00000585626.1	ENSG00000011600.7	448	2.76	0	0	0
ENST00000585901.2	ENSG00000011600.7	620	2.71	0	0	0
ENST00000586946.1	ENSG00000011600.7	522	10.52	0	0	0
ENST00000587837.1	ENSG00000011600.7	570	35.03	151.11	2.73	9.63
ENST00000588439.1	ENSG00000011600.7	594	1.75	3.38	0	3.94
ENST00000589517.1	ENSG00000011600.7	415	0	0	0	0
ENST00000233047.4	ENSG00000011638.6	2014	43.04	76.41	0	4.41
ENST00000261388.3	ENSG00000011638.6	1812	589.61	704.29	684.65	581.11
ENST00000451578.2	ENSG00000011638.6	1378	170.38	89.81	153.53	88.25
ENST00000572258.1	ENSG00000011638.6	584	47.47	24	51.39	51.84
ENST00000572599.1	ENSG00000011638.6	713	14.8	31.66	0	63.8
ENST00000573487.1	ENSG00000011638.6	1593	37.02	33.17	20.35	24.15
ENST00000573688.1	ENSG00000011638.6	1495	8.68	27.66	2.84	3.09
ENST00000574092.1	ENSG00000011638.6	581	0	0	17.24	27.34
ENST00000577162.1	ENSG00000011638.6	305	0	0	0	0
ENST00000309486.4	ENSG00000012048.15	7114	0	0	218.75	0
ENST00000346315.3	ENSG00000012048.15	6451	0	0	0	0
ENST00000351666.3	ENSG00000012048.15	3444	84.49	67.19	0	193.38
ENST00000352993.3	ENSG00000012048.15	3780	0	0	0	0
ENST00000354071.3	ENSG00000012048.15	6411	0	0	0	0
ENST00000357654.3	ENSG00000012048.15	7094	170.29	258.41	3847.98	3646.42
ENST00000412061.3	ENSG00000012048.15	1312	0	0	0	0
ENST00000461221.1	ENSG00000012048.15	5693	0	0	78.04	105.83
ENST00000461574.1	ENSG00000012048.15	726	14.9	21.01	148.23	127.63
ENST00000461798.1	ENSG00000012048.15	582	0	0	0	3.05
ENST00000467274.1	ENSG00000012048.15	4497	0	0	0	0
ENST00000468300.1	ENSG00000012048.15	3273	0	0	371.22	374.54
ENST00000470026.1	ENSG00000012048.15	2108	0	0	0	6.75
ENST00000471181.2	ENSG00000012048.15	5936	12.27	0	0	71.79
ENST00000472490.1	ENSG00000012048.15	561	0	2	7.23	4.62
ENST00000473961.1	ENSG00000012048.15	958	0	0	10.33	45.64
ENST00000476777.1	ENSG00000012048.15	769	0	0	0	0
ENST00000477152.1	ENSG00000012048.15	1980	0	0	0	0
ENST00000478531.1	ENSG00000012048.15	1972	0	0	82.16	101.83
ENST00000484087.1	ENSG00000012048.15	1495	7.93	13.34	112.19	41.23
ENST00000487825.1	ENSG00000012048.15	800	0	0	0	9.13
ENST00000489037.1	ENSG00000012048.15	455	1.12	0	1.57	1.81
ENST00000491747.2	ENSG00000012048.15	2379	0	34.11	0	0
ENST00000492859.1	ENSG00000012048.15	1584	0	5.28	24.48	8.71
ENST00000493795.1	ENSG00000012048.15	5732	0	0	0	0
ENST00000493919.1	ENSG00000012048.15	1948	0	0	0	0
ENST00000494123.1	ENSG00000012048.15	1612	0	0	0	0
ENST00000497488.1	ENSG00000012048.15	779	0	0	0	0
ENST00000586385.1	ENSG00000012048.15	781	0	11.66	19.11	36.18
ENST00000591534.1	ENSG00000012048.15	1282	0	0	283.73	396.27
ENST00000591849.1	ENSG00000012048.15	563	0	0	0	4.19
ENST00000013807.5	ENSG00000012061.11	1278	659.14	761.87	782.45	824.66
ENST00000300853.3	ENSG00000012061.11	3828	1290.95	774.58	1304.51	1532.99
ENST00000340192.7	ENSG00000012061.11	949	587.06	541.99	835.29	774.87
ENST00000423698.2	ENSG00000012061.11	3119	1081.54	1355.22	21.51	17.38
ENST00000587888.1	ENSG00000012061.11	556	0	0	38.19	43.5
ENST00000588300.1	ENSG00000012061.11	1055	17.17	67.67	0	4.2
ENST00000588738.1	ENSG00000012061.11	586	46.12	23.06	73.88	100.72
ENST00000589165.1	ENSG00000012061.11	1453	93.5	0.03	265.87	309.56
ENST00000589214.1	ENSG00000012061.11	674	0	2.4	0	0
ENST00000589381.1	ENSG00000012061.11	738	0	0	0	13.57
ENST00000590701.1	ENSG00000012061.11	345	7.45	0	0	10.28
ENST00000591636.1	ENSG00000012061.11	836	44.34	67.35	31.89	92.08
ENST00000592023.1	ENSG00000012061.11	738	0	0	0	0
ENST00000592083.1	ENSG00000012061.11	938	76.94	64.45	27.58	66.44
ENST00000592410.1	ENSG00000012061.11	508	45.69	25.74	0	0
ENST00000592444.1	ENSG00000012061.11	449	35.97	13.59	0	16.57
ENST00000592905.1	ENSG00000012061.11	882	52.15	143.05	32.84	168.19
ENST00000316347.7	ENSG00000012171.13	2922	4015.62	2825.44	2041.21	1116.73
ENST00000414456.2	ENSG00000012171.13	2735	0	0	246.39	0
ENST00000416295.1	ENSG00000012171.13	1088	256.4	125.3	95.72	81.08
ENST00000418576.1	ENSG00000012171.13	1765	0	0	0	0
ENST00000418948.1	ENSG00000012171.13	2957	59.01	684.98	611.68	2073.6
ENST00000419007.1	ENSG00000012171.13	3283	696.29	664.59	748.04	897.89
ENST00000419213.1	ENSG00000012171.13	933	219.87	251.77	102.23	37.56
ENST00000426144.2	ENSG00000012171.13	2291	0	38.68	80.09	27.16
ENST00000433753.1	ENSG00000012171.13	896	16.29	0	0	0
ENST00000434030.1	ENSG00000012171.13	1011	71.77	61.98	82.23	81.33
ENST00000439487.1	ENSG00000012171.13	594	0	0	0	0
ENST00000441915.1	ENSG00000012171.13	2710	1486.37	1537.47	1080.07	1393.95
ENST00000454314.1	ENSG00000012171.13	1060	62.7	35.17	210.12	194.35
ENST00000454939.1	ENSG00000012171.13	3157	216	240.13	193.9	205.19
ENST00000456210.1	ENSG00000012171.13	2065	78.12	66.27	96.71	129.68
ENST00000456560.2	ENSG00000012171.13	2221	724.56	870.22	200.62	335.48
ENST00000376310.3	ENSG00000012211.8	806	6.26	6.01	59.31	83.76
ENST00000376317.3	ENSG00000012211.8	2814	56.99	108.99	682.36	785.49
ENST00000417014.1	ENSG00000012211.8	545	5.32	0	1.47	1.89
ENST00000432913.1	ENSG00000012211.8	990	0	0	0.01	0
ENST00000453382.1	ENSG00000012211.8	1937	0	0	59.31	261.54
ENST00000536904.1	ENSG00000012211.8	2244	33.03	0	0	0
ENST00000538114.1	ENSG00000012211.8	1392	0	0	0	0
ENST00000540849.1	ENSG00000012211.8	2148	56.4	0	321.55	62.32
ENST00000231751.4	ENSG00000012223.8	2979	34.87	81.37	29.02	51.96
ENST00000415180.1	ENSG00000012223.8	684	0	0	0	0
ENST00000417439.1	ENSG00000012223.8	2130	0	101.61	65.08	0
ENST00000426532.2	ENSG00000012223.8	2494	112.13	23.02	1051.15	1036.57
ENST00000431944.1	ENSG00000012223.8	584	0	0	0	0
ENST00000443496.1	ENSG00000012223.8	2656	0	0	127.78	75.15
ENST00000462667.1	ENSG00000012223.8	523	0	0	0	1.33
ENST00000478874.2	ENSG00000012223.8	466	0	0	0	0
ENST00000493056.1	ENSG00000012223.8	493	0	0	0	0
ENST00000498301.1	ENSG00000012223.8	469	0	0	0.97	0
ENST00000220562.4	ENSG00000012232.4	6483	6447.31	6574.26	3726.75	3886.43
ENST00000454906.2	ENSG00000012232.4	539	0	0	0	0
ENST00000517738.1	ENSG00000012232.4	529	0	0	0	0
ENST00000518223.1	ENSG00000012232.4	562	0	0	0	0
ENST00000519288.1	ENSG00000012232.4	474	0	0	0	0
ENST00000519886.1	ENSG00000012232.4	803	0	0	0	0
ENST00000520679.1	ENSG00000012232.4	546	8.53	0	0	0
ENST00000520940.1	ENSG00000012232.4	542	0	0	3	0
ENST00000521473.1	ENSG00000012232.4	601	0	0	0	4.76
ENST00000521532.1	ENSG00000012232.4	517	0	0	0	0
ENST00000522698.1	ENSG00000012232.4	565	0	0	0	0
ENST00000522725.1	ENSG00000012232.4	548	0	0	0	0
ENST00000523149.1	ENSG00000012232.4	1779	0	0	0	13.55
ENST00000523271.1	ENSG00000012232.4	8257	248.16	343.74	56.25	41.26
ENST00000188403.7	ENSG00000012504.9	1630	0	0	129.47	0
ENST00000321046.5	ENSG00000012504.9	1779	0	0	0	50.15
ENST00000392986.3	ENSG00000012504.9	1778	0	0	144.41	92.36
ENST00000546380.1	ENSG00000012504.9	565	0	0	7.89	4.7
ENST00000548621.1	ENSG00000012504.9	496	0	0	0	0
ENST00000548884.1	ENSG00000012504.9	2884	2	0	63.24	116.79
ENST00000549996.1	ENSG00000012504.9	1633	0	0	0	0
ENST00000551184.1	ENSG00000012504.9	294	0	0	0	0
ENST00000551379.1	ENSG00000012504.9	1489	0	1	0	0
ENST00000374391.2	ENSG00000012779.6	2504	1595.71	1626.3	78.51	120.28
ENST00000475300.1	ENSG00000012779.6	446	18.4	10.58	1.27	3.44
ENST00000481117.1	ENSG00000012779.6	514	61.15	24.82	1	1.13
ENST00000483623.2	ENSG00000012779.6	363	0	0	0	0
ENST00000493336.1	ENSG00000012779.6	636	32.69	32.26	10.49	5.79
ENST00000498461.1	ENSG00000012779.6	604	28.6	27.74	0	7
ENST00000542434.1	ENSG00000012779.6	2178	107.45	9.31	13.72	23.36
ENST00000317961.4	ENSG00000012817.11	5472	2801.84	2608.79	742.88	831.72
ENST00000382806.2	ENSG00000012817.11	5134	171.04	104.94	198.46	311.24
ENST00000415360.1	ENSG00000012817.11	880	0	110.36	24.58	45.89
ENST00000440077.1	ENSG00000012817.11	4701	0	0	223.03	0
ENST00000447300.1	ENSG00000012817.11	1336	14.03	29.18	18.89	8.6
ENST00000469599.2	ENSG00000012817.11	5501	991.27	924.69	135.92	113.52
ENST00000478891.1	ENSG00000012817.11	856	9.54	7.66	16.27	11.6
ENST00000485154.1	ENSG00000012817.11	792	33.3	118.09	56.43	44.62
ENST00000492117.1	ENSG00000012817.11	5235	95.98	162.8	17.55	24.68
ENST00000541639.1	ENSG00000012817.11	5579	0	151.49	0	20.13
ENST00000262059.4	ENSG00000012822.11	3264	133.87	0	0	22.64
ENST00000430117.2	ENSG00000012822.11	2706	1497.93	1368.34	261.31	57.67
ENST00000546443.1	ENSG00000012822.11	1523	2536.82	2371.64	682.84	556.51
ENST00000546619.1	ENSG00000012822.11	549	6.09	17.05	0	0
ENST00000546774.1	ENSG00000012822.11	733	82.04	45.63	27.26	15.45
ENST00000547885.1	ENSG00000012822.11	555	8.41	10.58	1.84	2.64
ENST00000547949.2	ENSG00000012822.11	532	0	0	0	0
ENST00000547988.1	ENSG00000012822.11	1277	114.83	140.5	15.13	37.66
ENST00000548177.1	ENSG00000012822.11	567	0	0	0	0
ENST00000548263.1	ENSG00000012822.11	3888	4141.58	4858.93	1535.74	1969.51
ENST00000548431.1	ENSG00000012822.11	612	28.47	25.97	13.25	14.88
ENST00000549173.1	ENSG00000012822.11	554	7.64	0	0	0
ENST00000549349.1	ENSG00000012822.11	586	0	0	0	1.73
ENST00000549613.1	ENSG00000012822.11	884	188.24	145.4	57.68	57.84
ENST00000549688.1	ENSG00000012822.11	549	0	0	0	0
ENST00000549784.1	ENSG00000012822.11	746	13.9	16.82	1.87	16.44
ENST00000549935.2	ENSG00000012822.11	2112	2047.4	1925.7	409.47	555.32
ENST00000550804.1	ENSG00000012822.11	2291	2416.02	2001.26	422.86	619.39
ENST00000551900.1	ENSG00000012822.11	559	7.62	21.22	11.74	0
ENST00000552282.1	ENSG00000012822.11	569	36.15	0	0	9.92
ENST00000552623.1	ENSG00000012822.11	551	0	0	0	0
ENST00000553154.1	ENSG00000012822.11	566	0	135.95	0	27.42
ENST00000322054.5	ENSG00000013016.10	4636	7364.77	6662.66	515.97	646.17
ENST00000541626.1	ENSG00000013016.10	3328	4410.23	4525.34	220.03	174.83
ENST00000157812.2	ENSG00000013275.3	1591	3633.06	3098.51	5163.06	5499.02
ENST00000455878.2	ENSG00000013275.3	1333	660.31	822.22	850.23	1066.21
ENST00000593455.1	ENSG00000013275.3	1532	327.15	649.46	445.21	641.71
ENST00000596386.1	ENSG00000013275.3	929	30.58	35.02	108.61	67.76
ENST00000601194.1	ENSG00000013275.3	650	10.31	13.19	24.42	21.1
ENST00000601697.1	ENSG00000013275.3	1623	52.59	201.59	215.47	295.2
ENST00000285599.3	ENSG00000013288.4	5143	2991.35	2862.22	2107.91	2257.9
ENST00000504248.1	ENSG00000013288.4	2968	0	37.43	134.8	159.89
ENST00000504960.1	ENSG00000013288.4	696	0	0	6.63	14.58
ENST00000505907.1	ENSG00000013288.4	7719	921.57	807.36	1232.66	1231.64
ENST00000510427.1	ENSG00000013288.4	167	0.08	0	0	1
ENST00000231706.5	ENSG00000013293.5	10103	5607	5894	110	76
ENST00000466168.1	ENSG00000013293.5	473	0	0	0	1
ENST00000225308.8	ENSG00000013306.11	1607	1982.86	1262.12	5151.78	5572.27
ENST00000377095.5	ENSG00000013306.11	1565	651.44	767.75	3442.61	4341.22
ENST00000537904.2	ENSG00000013306.11	1274	17.98	0	135.49	156.21
ENST00000585523.1	ENSG00000013306.11	574	26.3	8.89	0	8.75
ENST00000585636.1	ENSG00000013306.11	561	0	0	0	0
ENST00000585695.1	ENSG00000013306.11	1121	0	0	0	190.32
ENST00000586016.1	ENSG00000013306.11	1156	0	0	0	0
ENST00000586633.1	ENSG00000013306.11	566	0	0	0	0
ENST00000588049.1	ENSG00000013306.11	839	0	0	28.82	0
ENST00000588315.1	ENSG00000013306.11	1409	290.77	378.46	389.61	359.72
ENST00000588767.1	ENSG00000013306.11	807	45.32	47.24	56.65	132.73
ENST00000590194.1	ENSG00000013306.11	1542	0	314.29	1227.55	1027.48
ENST00000591006.1	ENSG00000013306.11	2217	482.91	599.02	1650.1	1789.09
ENST00000591151.1	ENSG00000013306.11	636	30.57	31.16	61.26	68.78
ENST00000592372.1	ENSG00000013306.11	867	93.72	109.77	318.75	414.91
ENST00000592857.1	ENSG00000013306.11	837	49.13	29.3	140.66	147.89
ENST00000593166.1	ENSG00000013306.11	797	0	0	8.72	3.62
ENST00000355851.4	ENSG00000013374.11	3144	452.85	231.8	206.17	134.07
ENST00000413040.2	ENSG00000013374.11	3180	0	230.24	0	0
ENST00000460712.1	ENSG00000013374.11	664	70.18	98.75	50.86	53.22
ENST00000468404.1	ENSG00000013374.11	1703	65.4	115.99	683.95	656.04
ENST00000470229.1	ENSG00000013374.11	619	21.75	17.16	12.54	46.36
ENST00000470316.1	ENSG00000013374.11	1752	133.63	103.79	101.88	183.65
ENST00000477666.1	ENSG00000013374.11	568	0	0	0	0
ENST00000480714.1	ENSG00000013374.11	586	40.14	40.17	50	51.51
ENST00000480907.1	ENSG00000013374.11	977	2.85	0	81.64	171.32
[truncated: 84,720 more rows]
