# Supplementary material for: Union Exon Based Approach for RNA-Seq Gene Quantification: To Be or Not to Be?
Source: PLoS One. 2015 Nov 11;10(11):e0141910. doi: 10.1371/journal.pone.0141910 (PMC4641603; doi:10.1371/journal.pone.0141910)
Supplement: S2 Table — (XLSX) [file pone.0141910.s002.xlsx]

## Sheet: RPKM
gene	symbol	gene_type	chr	start	end	strand	exons	transcripts	length	fc_HBRR_C4	rsem_HBRR_C4	txSum_HBRR_C4	fc_HBRR_C6	rsem_HBRR_C6	txSum_HBRR_C6	fc_UHRR_C1	rsem_UHRR_C1	txSum_UHRR_C1	fc_UHRR_C2	rsem_UHRR_C2	txSum_UHRR_C2
ENSG00000000003.10	TSPAN6	protein_coding	chrX	99883667	99894988	-	9	3	2968	4.46344	4.45006	6.19124	5.08804	4.93744	7.56951	22.0956	22.3658	30.796	21.8023	21.9939	29.9101
ENSG00000000419.8	DPM1	protein_coding	chr20	49551404	49575092	-	10	7	1207	28.7846	27.5158	30.7146	28.6815	27.3817	30.7053	76.7424	73.8847	83.0393	73.1087	71.1329	79.9679
ENSG00000000457.9	SCYL3	protein_coding	chr1	169818772	169863408	-	15	5	6876	2.7978	2.7311	4.83243	2.73864	2.55401	4.9604	3.10789	3.05777	6.49634	2.96426	2.81278	5.94622
ENSG00000000460.12	C1orf112	protein_coding	chr1	169631245	169823221	+	33	10	6354	1.33796	1.25853	3.50535	1.26035	1.12503	2.62482	7.8076	7.52532	16.2391	7.66282	7.31322	16.1934
ENSG00000000938.8	FGR	protein_coding	chr1	27938575	27961788	-	15	8	3474	3.79343	3.76733	6.35259	3.47098	3.4295	5.97857	1.37184	1.35508	2.03834	1.59758	1.44822	2.09301
ENSG00000000971.11	CFH	protein_coding	chr1	196621008	196716634	+	21	6	8144	4.95635	5.00982	10.9256	4.87172	4.99444	11.7463	3.37105	3.28962	8.01038	2.99673	3.01434	7.02698
ENSG00000001036.9	FUCA2	protein_coding	chr6	143815948	143832827	-	7	4	3119	10.297	9.9475	14.339	10.2336	10.1073	15.001	57.6079	57.5997	77.5128	56.5059	56.0109	75.8323
ENSG00000001167.10	NFYA	protein_coding	chr6	41040684	41067715	+	10	2	3811	12.3931	12.3253	12.9266	14.2292	14.0806	14.8369	25.7821	25.7876	30.3099	24.4074	24.3399	29.9808
ENSG00000001460.13	STPG1	protein_coding	chr1	24683489	24743424	-	12	13	8514	6.15621	6.21366	20.4683	5.8156	5.8381	18.8817	2.21222	2.21478	7.94244	2.30003	2.28054	7.70794
ENSG00000001461.12	NIPAL3	protein_coding	chr1	24742284	24799466	+	16	8	9404	42.6164	43.3015	81.1244	41.8102	42.2213	78.8807	7.75535	7.821	16.9985	7.58203	7.63243	16.733
ENSG00000001497.12	LAS1L	protein_coding	chrX	64732462	64754655	-	14	6	5589	23.5626	21.2299	38.6316	22.4714	20.3578	37.3177	29.323	28.2545	63.7381	29.8079	29.2083	66.2782
ENSG00000001561.6	ENPP4	protein_coding	chr6	46097730	46114436	+	4	1	4651	15.4007	15.6342	15.6342	18.5762	18.7664	18.7664	1.98394	1.94471	1.94471	1.83422	1.8373	1.8373
ENSG00000001629.5	ANKIB1	protein_coding	chr7	91875548	92030698	+	24	7	7130	14.1918	14.1895	21.5773	15.2303	15.2728	21.9386	19.583	19.5217	29.8675	18.1139	18.0413	30.1653
ENSG00000002330.9	BAD	protein_coding	chr11	64037302	64052176	-	5	7	1708	47.8587	48.7453	91.2309	43.2297	43.6943	82.1903	21.4612	21.9874	40.7431	24.0938	24.7639	46.4108
ENSG00000002549.8	LAP3	protein_coding	chr4	17578815	17609595	+	15	10	3785	18.7904	18.6974	39.346	18.7822	18.7415	39.0789	32.0405	32.4559	66.8552	31.2279	31.6876	63.6747
ENSG00000002834.13	LASP1	protein_coding	chr17	37026112	37078023	+	9	9	7061	28.2727	28.5578	50.5253	28.3409	28.7787	51.1857	58.1849	59.2423	104.066	58.154	59.1499	103.491
ENSG00000002919.10	SNX11	protein_coding	chr17	46180719	46200436	+	11	14	3606	11.0787	11.4077	18.0555	11.2183	11.4317	18.226	10.0246	10.2018	17.9768	9.86634	10.0188	16.6676
ENSG00000002933.3	TMEM176A	protein_coding	chr7	150497491	150502208	+	4	11	3479	6.47002	6.59888	19.6546	6.05726	6.10944	17.9312	0.0437191	0.0456111	0.140726	0.104494	0.109005	0.299671
ENSG00000003056.3	M6PR	protein_coding	chr12	9092959	9102551	-	7	12	3777	21.1237	20.7016	55.1697	20.5424	20.2196	62.2599	50.5653	49.4767	155.489	49.7932	48.6495	153.608
ENSG00000003137.4	CYP26B1	protein_coding	chr2	72356367	72375167	-	7	5	5015	18.8356	19.0054	26.4767	17.5062	17.6561	22.9145	1.50127	1.39749	2.89209	1.66726	1.64345	2.5973
ENSG00000003249.9	DBNDD1	protein_coding	chr16	90071273	90086536	-	6	6	3522	35.3502	36.4507	62.9433	32.684	33.5299	58.1047	16.1441	16.6626	28.7637	18.5174	19.0009	32.8979
ENSG00000003393.10	ALS2	protein_coding	chr2	202565277	202645912	-	40	13	10381	27.0228	26.4546	46.6913	27.3815	26.5367	46.2429	5.54564	5.47739	10.1927	5.9136	5.8474	11.888
ENSG00000003400.10	CASP10	protein_coding	chr2	202047604	202094129	+	12	13	7598	1.07948	1.07776	2.1417	0.737798	0.730714	1.33356	4.58418	4.33703	9.11186	4.2934	4.23251	8.59673
ENSG00000003436.10	TFPI	protein_coding	chr2	188328957	188430487	-	13	13	11714	0.316655	0.309555	2.07789	0.287133	0.299022	1.48251	10.1732	10.2839	77.4915	9.74476	9.74241	78.4486
ENSG00000003509.11	NDUFAF7	protein_coding	chr2	37458774	37480546	+	12	13	3651	6.2157	6.09726	11.6145	6.97516	6.73533	12.7283	9.58167	9.1778	21.5943	10.4285	10.1308	23.3976
ENSG00000003987.9	MTMR7	protein_coding	chr8	17155539	17271037	-	20	10	5692	10.1029	10.0031	19.8739	10.8093	10.5829	19.7926	0.169236	0.157975	0.586138	0.174572	0.168783	0.44924
ENSG00000003989.12	SLC7A2	protein_coding	chr8	17354597	17428082	+	15	5	7905	6.1729	6.22453	6.611	7.14644	7.20422	7.57011	47.8198	48.2801	51.4606	44.9365	45.6322	50.7378
ENSG00000004142.7	POLDIP2	protein_coding	chr17	26673659	26684545	-	11	2	2662	58.9739	57.5816	70.2447	56.2736	54.7994	66.9298	81.1726	79.9267	98.1999	84.5792	83.1302	102.019
ENSG00000004399.8	PLXND1	protein_coding	chr3	129274018	129325661	-	36	18	9738	12.1986	11.8912	42.4297	12.3849	12.0438	46.8638	21.8641	21.4008	70.3246	22.7101	22.1068	75.6022
ENSG00000004455.12	AK2	protein_coding	chr1	33473585	33546597	-	13	13	5683	15.4175	13.4247	51.6677	14.8566	12.8135	49.7352	72.7261	71.1641	239.106	71.3894	69.4619	233.076
ENSG00000004468.8	CD38	protein_coding	chr4	15779898	15854853	+	8	5	6855	1.27043	1.31018	1.79492	1.13486	1.15752	1.71949	7.3923	7.51546	14.3975	7.74623	7.84459	14.0729
ENSG00000004478.5	FKBP4	protein_coding	chr12	2904119	2914576	+	13	7	3958	91.0388	91.0389	166.153	89.7599	89.9487	165.721	130.271	131.299	236.139	130.939	133.046	238.907
ENSG00000004660.10	CAMKK1	protein_coding	chr17	3763609	3798185	-	17	5	7424	35.5827	35.3387	74.589	34.9406	35.1613	74.3655	3.81749	3.70128	7.93542	4.30915	4.11036	8.71822
ENSG00000004700.11	RECQL	protein_coding	chr12	21621845	21654603	-	15	8	3778	6.8788	6.77582	7.86274	7.00111	6.99456	8.25051	33.7102	33.3211	42.7562	29.7269	29.3439	38.9569
ENSG00000004766.11	CCDC132	protein_coding	chr7	92861653	92988338	+	32	23	7359	8.67214	8.57577	21.3178	9.58263	9.50666	22.6043	5.58391	5.43744	12.4574	4.64361	4.50396	11.8328
ENSG00000004776.7	HSPB6	protein_coding	chr19	36245469	36248980	-	3	3	1722	24.3503	25.1576	29.7037	22.2563	23.0118	27.0939	29.6336	30.6243	36.0472	32.1454	33.1073	39.1035
ENSG00000004777.14	ARHGAP33	protein_coding	chr19	36265434	36279724	+	25	13	5260	25.9606	25.4066	43.4664	24.0988	23.2529	39.1189	11.152	10.4028	19.2376	11.8368	11.0404	18.4713
ENSG00000004779.5	NDUFAB1	protein_coding	chr16	23592323	23607677	-	7	5	1600	74.6611	76.2298	169.912	71.0019	72.3334	161.412	91.9246	93.8863	209.405	92.7016	94.9494	212.142
ENSG00000004799.7	PDK4	protein_coding	chr7	95212811	95225803	-	9	5	4519	19.9852	19.9329	26.0039	22.0352	21.951	28.5664	15.1627	14.9938	19.3911	14.1853	13.7627	18.5853
ENSG00000004838.9	ZMYND10	protein_coding	chr3	50378541	50384283	-	9	9	4009	1.20109	1.16806	3.0152	1.29557	1.20062	4.18729	0.765109	0.73885	2.01612	1.0398	0.945944	2.28751
ENSG00000004846.12	ABCB5	protein_coding	chr7	20654830	20816658	+	32	6	9257	0	0	0	0.0123586	0.0128704	0.0205026	0.528519	0.425687	2.3146	0.431986	0.341389	1.67616
ENSG00000004848.6	ARX	protein_coding	chrX	25021811	25034065	-	5	1	2876	4.9667	4.98485	4.98485	4.82915	4.67284	4.67284	0.114585	0.119544	0.119544	0.0505613	0.0527439	0.0527439
ENSG00000004961.10	HCCS	protein_coding	chrX	11129421	11141198	+	7	3	2335	13.3498	13.2258	19.3156	14.8946	14.5724	20.1817	22.5814	22.2108	41.603	23.0421	22.5534	41.3877
ENSG00000004975.7	DVL2	protein_coding	chr17	7128660	7137864	-	10	15	5350	11.765	11.3023	29.9729	11.2479	10.8986	29.7824	19.1284	19.0961	42.025	20.5981	20.6603	46.4257
ENSG00000005001.5	PRSS22	protein_coding	chr16	2902728	2908171	-	8	8	2387	0.743197	0.563381	1.29089	1.05441	0.838528	1.69168	3.58954	2.3821	5.92364	4.08159	2.51019	6.34506
ENSG00000005007.8	UPF1	protein_coding	chr19	18942747	18979045	+	28	13	8600	30.2937	30.6822	51.7233	29.5428	29.8406	50.6914	32.5361	32.8525	54.5063	33.0902	33.4339	56.3453
ENSG00000005022.5	SLC25A5	protein_coding	chrX	118602363	118605282	+	5	4	1500	168.431	171.909	206.789	176.014	179.299	217.08	471.489	484.136	573.267	464.986	477.255	566.851
ENSG00000005073.5	HOXA11	protein_coding	chr7	27221129	27224842	-	2	2	2307	0.0399464	0.041637	0.0418547	0.0396719	0.0413146	0.0415306	5.69189	5.77773	5.94144	5.66235	5.52323	5.63939
ENSG00000005075.11	POLR2J	protein_coding	chr7	102113565	102119354	-	4	2	962	32.8343	32.2019	33.2384	30.9437	30.5655	32.1125	65.2717	64.99	67.694	65.9302	65.6489	68.2724
ENSG00000005102.8	MEOX1	protein_coding	chr17	41717756	41739322	-	3	4	2707	0	0	0	0.0253573	0	0	1.04883	1.09422	1.68439	0.931109	0.924607	1.06619
ENSG00000005156.7	LIG3	protein_coding	chr17	33307513	33332083	+	19	16	8240	4.71686	4.59882	12.3961	4.87883	4.69623	12.3677	10.3737	10.3188	27.8847	11.0972	10.9933	29.7947
ENSG00000005175.5	RPAP3	protein_coding	chr12	48057070	48099844	-	19	7	3343	8.83521	8.7853	13.359	8.86348	8.81707	13.5149	18.5175	18.4408	28.7497	17.2615	17.2428	26.8407
ENSG00000005189.15	AC004381.6	protein_coding	chr16	20817751	20860987	+	21	19	4111	2.01193	1.84589	3.48772	1.53058	1.44325	2.50076	8.89184	8.47895	15.4858	7.0685	6.66026	11.7694
ENSG00000005194.10	CIAPIN1	protein_coding	chr16	57462081	57481440	-	9	15	3509	21.0628	21.1946	41.1542	19.3857	19.1834	38.2461	30.8618	30.7052	60.4064	30.0788	29.9435	59.9096
ENSG00000005238.15	FAM214B	protein_coding	chr9	35104109	35116338	-	10	10	6409	10.5256	10.2816	22.2082	10.2498	10.1165	21.8892	4.12146	4.08525	10.0335	4.45084	4.31951	9.61405
ENSG00000005249.8	PRKAR2B	protein_coding	chr7	106685094	106802256	+	13	3	4318	19.603	19.565	22.9586	22.282	22.41	26.0639	8.23075	8.18885	9.49123	7.46491	7.44757	9.54932
ENSG00000005302.13	MSL3	protein_coding	chrX	11776278	11793870	+	14	17	6494	8.8268	8.76031	28.6545	8.41733	8.43196	25.5145	8.08819	7.90066	25.1286	7.96785	7.74731	24.6485
ENSG00000005339.8	CREBBP	protein_coding	chr16	3775055	3930727	-	31	12	15068	12.9843	13.1689	22.7316	12.3105	12.3917	20.6937	11.3946	11.5104	26.827	11.3587	11.4816	23.9033
ENSG00000005379.11	BZRAP1	protein_coding	chr17	56378592	56406152	-	28	12	11382	25.207	24.7652	82.4171	25.2147	24.6635	87.7042	1.75947	1.63812	7.42043	1.90147	1.70812	6.93584
ENSG00000005381.6	MPO	protein_coding	chr17	56347217	56358296	-	11	6	3622	0.750583	0.755828	0.851511	0.878086	0.848657	1.37895	0.0139977	0.0146035	0.0164522	0.0669125	0.069801	0.0786374
ENSG00000005436.9	GCFC2	protein_coding	chr2	75879126	75938115	-	18	11	5465	2.57583	2.37285	6.34508	2.55812	2.46348	7.76805	6.95785	6.80408	17.5696	6.69198	6.40722	20.6287
ENSG00000005448.12	WDR54	protein_coding	chr2	74648805	74652882	+	5	13	2860	9.32036	9.26978	22.2877	8.45629	8.20656	19.6367	20.2	20.2698	50.9304	20.7444	20.7206	52.9295
ENSG00000005469.7	CROT	protein_coding	chr7	86974997	87029111	+	20	7	4979	2.88741	2.84079	5.39914	3.19844	3.10116	5.71274	5.62084	5.24794	11.5852	4.71182	4.55471	8.79949
ENSG00000005471.11	ABCB4	protein_coding	chr7	87031013	87109751	-	33	11	7494	0.0614868	0.0608845	0.116306	0.058011	0.0540538	0.103257	0.598733	0.603471	1.60144	0.662973	0.607252	1.25524
ENSG00000005483.15	KMT2E	protein_coding	chr7	104654626	104754808	+	31	17	9227	18.9192	19.0796	35.202	19.1661	19.1669	33.6512	20.0446	20.2386	35.9879	18.8722	18.9142	31.6856
ENSG00000005486.12	RHBDD2	protein_coding	chr7	75471920	75518244	+	8	9	2441	140.283	144.764	226.182	132.045	136.302	217.103	36.659	37.5738	55.0024	39.4165	40.2067	61.3173
ENSG00000005513.9	SOX8	protein_coding	chr16	1031808	1036979	+	2	2	4432	29.9633	30.8304	43.341	29.236	30.0433	42.3682	2.26501	2.3511	3.31006	2.13265	2.2019	3.04877
ENSG00000005812.6	FBXL3	protein_coding	chr13	77566740	77601330	-	7	6	4651	16.218	16.197	27.6058	18.7287	18.7101	29.0665	9.53273	9.55294	14.6964	8.89494	8.79513	16.0535
ENSG00000005882.7	PDK2	protein_coding	chr17	48172101	48189516	+	13	15	5481	43.2871	44.234	126.561	42.3259	43.1742	127.077	7.76542	7.87953	20.858	7.50374	7.70774	23.1377
ENSG00000005884.13	ITGA3	protein_coding	chr17	48133332	48167845	+	24	17	9802	7.90691	7.91569	23.508	7.13828	7.04246	16.3415	34.3497	35.0187	81.0062	36.4178	37.1285	85.1751
ENSG00000005889.11	ZFX	protein_coding	chrX	24167290	24234372	+	18	12	9037	3.69666	3.65912	5.45955	3.83836	3.84963	5.85278	6.56956	6.42076	11.633	5.90807	5.84699	10.2287
ENSG00000005893.11	LAMP2	protein_coding	chrX	119561682	119603220	-	12	6	5617	54.0641	53.8768	128.883	60.4872	59.738	129.357	40.7663	41.2405	105.511	38.3448	38.6633	98.9529
ENSG00000005955.8	GGNBP2	protein_coding	chr17	34900737	34946278	+	11	9	9729	13.7917	13.7509	61.5965	14.0662	14.0559	59.9106	13.6845	13.5021	58.3707	13.4244	13.2763	55.6585
ENSG00000005961.13	ITGA2B	protein_coding	chr17	42449548	42466873	-	23	12	5551	2.10012	1.75207	5.64124	1.93318	1.64836	4.84476	1.51615	1.23873	3.34684	1.54993	1.33446	3.27007
ENSG00000005981.8	ASB4	protein_coding	chr7	95107756	95169544	+	6	3	4605	0.560343	0.557983	0.671767	0.60121	0.595058	0.865826	0.31928	0.333098	0.43724	0.405244	0.411758	0.596362
ENSG00000006007.7	GDE1	protein_coding	chr16	19513015	19533467	-	7	5	4412	40.4229	41.5022	85.1308	39.0612	39.9441	74.5381	28.7914	29.5819	53.9052	28.8609	29.5911	59.7095
ENSG00000006015.13	C19orf60	protein_coding	chr19	18699495	18703146	+	3	8	3370	23.0528	23.2659	81.8485	21.197	21.2686	75.1992	12.1107	12.3131	41.0604	14.0668	14.2839	46.1134
ENSG00000006016.6	CRLF1	protein_coding	chr19	18683030	18718551	-	12	5	3018	9.13777	8.77653	24.9766	8.72623	8.21117	24.714	22.8131	21.8638	59.6086	24.4766	23.8578	61.8989
ENSG00000006025.7	OSBPL7	protein_coding	chr17	45884738	45899200	-	18	10	6572	7.32329	6.58086	16.7508	7.078	6.5154	14.2521	8.94879	8.18919	17.9563	9.58808	8.8556	18.3708
ENSG00000006042.7	TMEM98	protein_coding	chr17	31254928	31272124	+	9	9	5187	13.4894	13.1992	38.4687	13.163	12.6698	36.2887	7.90745	8.09161	30.9696	7.99447	8.08612	27.9782
ENSG00000006047.8	YBX2	protein_coding	chr17	7191571	7197934	-	6	7	4618	0.813203	0.847618	2.25068	0.743204	0.763657	1.46608	4.4793	4.46126	8.61315	5.03292	5.1188	10.4174
ENSG00000006062.9	MAP3K14	processed_transcript	chr17	43340488	43394414	-	16	5	5132	5.65203	5.57303	7.24907	5.91191	5.71096	7.45547	7.2562	6.99306	9.02235	7.70235	7.4831	9.25393
ENSG00000006114.11	SYNRG	protein_coding	chr17	35874900	35969544	-	25	17	14277	5.8804	5.77772	12.8849	5.97301	5.87485	13.4833	6.20738	6.2241	17.0612	5.68674	5.68786	16.7455
ENSG00000006116.3	CACNG3	protein_coding	chr16	24266874	24374122	+	4	1	3088	34.0215	34.6758	34.6758	32.3428	32.9875	32.9875	0.0164182	0.0171288	0.0171288	0.0392418	0.0327486	0.0327486
ENSG00000006118.10	TMEM132A	protein_coding	chr11	60691935	60704631	+	9	15	7271	36.5977	37.3175	113.145	34.2976	34.7706	102.501	15.8039	15.9569	42.9026	17.3226	17.4063	49.7316
ENSG00000006128.7	TAC1	protein_coding	chr7	97361220	97369784	+	7	5	1888	8.17595	7.7588	12.862	9.39227	8.96081	15.6713	0.322243	0.266149	0.640251	0.0385101	0	0
ENSG00000006194.6	ZNF263	protein_coding	chr16	3313743	3351401	+	9	10	9329	7.25081	7.24619	25.7443	6.59518	6.47746	23.5468	9.46167	9.43741	38.5127	9.12379	9.04339	35.7234
ENSG00000006210.6	CX3CL1	protein_coding	chr16	57406370	57418960	+	3	4	5983	29.9243	30.8495	55.6538	29.5886	30.515	55.098	4.42763	4.57947	8.21485	4.96623	5.16372	9.49366
ENSG00000006283.13	CACNA1G	protein_coding	chr17	48638429	48704835	+	39	34	9709	14.3873	14.5287	19.6581	14.0622	14.0849	19.4553	0.148824	0.147093	0.196906	0.189712	0.19009	0.264052
ENSG00000006327.9	TNFRSF12A	protein_coding	chr16	3068446	3072384	+	4	7	1848	2.69288	2.72888	5.13297	3.04582	3.14614	5.99008	70.2057	70.4248	125.088	73.1399	73.9442	130.177
ENSG00000006377.9	DLX6	protein_coding	chr7	96634860	96640351	+	3	4	3449	0.861712	0.800703	1.46988	0.849156	0.80832	1.59097	1.12453	1.12719	2.24852	1.08214	1.06288	2.06887
ENSG00000006432.11	MAP3K9	protein_coding	chr14	71189243	71276251	-	16	6	12386	14.771	15.0607	17.0244	15.22	15.502	17.5956	2.70157	2.77152	3.16667	2.71395	2.74537	3.47472
ENSG00000006451.3	RALA	protein_coding	chr7	39663082	39747723	+	8	5	3665	18.3056	17.9795	22.8801	19.8529	19.2966	25.2094	27.4317	26.2809	37.6576	26.2394	25.5303	35.5102
ENSG00000006468.9	ETV1	protein_coding	chr7	13930853	14031050	-	24	24	9686	30.5864	30.7106	91.1692	35.0322	35.1469	89.3553	4.82603	4.80281	16.8183	4.70652	4.61214	16.705
ENSG00000006530.11	AGK	protein_coding	chr7	141250989	141355044	+	20	11	6547	10.8773	10.9012	28.7482	10.2958	10.107	26.7294	11.8831	11.953	35.4521	12.5232	12.4382	35.5193
ENSG00000006534.11	ALDH3B1	protein_coding	chr11	67776048	67796744	+	12	13	6621	0.741176	0.631091	1.58769	0.767185	0.70538	1.63281	10.5787	9.20307	21.5472	10.9044	9.64539	22.9306
ENSG00000006611.11	USH1C	protein_coding	chr11	17515442	17565963	-	31	10	4187	4.00034	3.84845	13.7875	4.55757	4.20564	13.5003	0.992921	0.890615	2.35274	1.18082	1.10499	2.75756
ENSG00000006634.3	DBF4	protein_coding	chr7	87505531	87538856	+	12	8	4583	1.53326	1.48287	3.84761	1.33301	1.33621	2.51645	15.6424	15.3672	40.0792	15.0713	14.7014	36.7485
ENSG00000006638.7	TBXA2R	protein_coding	chr19	3594504	3606838	-	4	4	2793	0.494932	0.4213	0.487641	0.466955	0.42657	0.611494	1.38866	1.42982	1.53124	1.66604	1.62029	2.08954
ENSG00000006712.10	PAF1	protein_coding	chr19	39876492	39881835	-	11	9	2668	40.8883	40.6656	54.097	39.0294	38.8503	51.4331	37.8726	38.0545	50.0893	37.1802	37.1743	49.1837
ENSG00000006715.11	VPS41	protein_coding	chr7	38762563	38971994	-	37	14	7801	19.4537	19.529	43.2779	20.7132	20.6668	44.1728	12.956	13.1099	38.0153	11.1128	11.0675	29.9305
ENSG00000006740.12	ARHGAP44	protein_coding	chr17	12692856	12894960	+	24	11	9281	21.5571	21.7346	48.7367	20.2527	20.3904	45.2593	1.27008	1.27661	2.92973	1.20121	1.17679	2.64177
ENSG00000006744.14	ELAC2	protein_coding	chr17	12895708	12921504	-	21	21	6345	13.5765	13.5228	32.0836	13.1767	13.1515	31.3737	30.0562	30.044	82.9076	31.0958	31.2986	79.4742
ENSG00000006747.10	SCIN	protein_coding	chr7	12610203	12693228	+	23	11	5048	1.63391	1.58889	2.67758	1.78133	1.7654	3.39064	0.246065	0.246237	0.522749	0.297665	0.305507	0.536073
ENSG00000006756.11	ARSD	protein_coding	chrX	2822011	2847392	-	12	7	7030	2.15971	2.15546	3.14982	2.1286	2.12522	3.057	5.6469	5.57904	11.1785	5.89862	5.98063	10.1495
ENSG00000006757.7	PNPLA4	protein_coding	chrX	7866288	7895780	-	8	4	3441	6.42765	6.39958	10.678	5.14003	5.18666	9.76724	5.41473	5.2494	13.1303	5.3951	5.31207	14.1732
ENSG00000006831.9	ADIPOR2	protein_coding	chr12	1797740	1897844	+	12	7	5878	41.849	42.5088	62.4704	42.663	43.2012	63.7326	41.3885	41.8929	62.2023	39.9819	40.3057	59.3734
ENSG00000007038.6	PRSS21	protein_coding	chr16	2867164	2876305	+	6	11	1984	0.116124	0.108935	0.216988	0.126859	0.0960814	0.221657	39.1107	33.8984	71.0709	40.5801	35.3616	74.7979
ENSG00000007080.6	CCDC124	protein_coding	chr19	18043825	18054800	+	6	4	1660	54.0308	55.4639	96.4669	49.5245	50.9148	88.4594	60.6104	61.7359	108.279	63.8012	65.2	114.185
ENSG00000007174.13	DNAH9	protein_coding	chr17	11501748	11873065	+	76	15	16980	0.799177	0.765114	6.29126	0.847586	0.820935	6.81294	0.0821106	0.0778765	0.590369	0.0842112	0.0640237	0.36608
ENSG00000007202.10	KIAA0100	protein_coding	chr17	26941458	26972472	-	36	16	9235	28.6598	29.0484	43.9385	27.7319	28.0158	42.6769	47.1064	47.5957	74.9536	45.3826	45.8962	70.8355
ENSG00000007237.14	GAS7	protein_coding	chr17	9813926	10101868	-	23	20	10100	135.874	139.211	211.099	138.827	142.327	216.139	11.0535	11.3119	19.9438	11.2492	11.5195	18.6993
ENSG00000007255.6	TRAPPC6A	protein_coding	chr19	45666186	45681495	-	6	5	933	17.73	17.3221	21.9036	11.6979	11.2628	14.6494	28.5558	28.6012	35.9824	30.7817	30.295	37.7018
ENSG00000007264.9	MATK	protein_coding	chr19	3777971	3802127	-	22	14	4138	14.5539	13.7887	29.6095	14.6696	14.1944	30.464	7.28392	6.95364	14.1162	8.46903	7.7471	15.902
ENSG00000007341.14	ST7L	protein_coding	chr1	113066140	113163447	-	23	32	8111	2.64732	2.4929	9.96272	2.56143	2.39134	10.3295	3.46602	3.2704	21.0776	3.19418	2.95803	17.9064
ENSG00000007376.3	RPUSD1	protein_coding	chr16	834974	838397	-	5	10	2769	12.4389	12.6011	18.4125	11.5519	11.5398	17.4651	21.047	21.3466	32.1114	23.7368	23.9489	35.5858
ENSG00000007384.11	RHBDF1	protein_coding	chr16	108058	126354	-	14	12	5104	4.44622	4.06979	12.579	3.86875	3.62745	10.4036	12.1137	10.8399	29.3618	13.7465	12.7598	34.9611
ENSG00000007392.12	LUC7L	protein_coding	chr16	238968	279462	-	10	20	6176	17.6673	17.1241	71.7345	18.3239	18.0949	73.6843	18.056	17.5699	68.2484	19.3776	18.9451	78.0627
ENSG00000007402.7	CACNA2D2	protein_coding	chr3	50400233	50541675	-	40	10	6319	14.872	14.3841	19.5203	14.625	14.1106	19.0079	2.32677	2.20983	2.81503	2.7538	2.70463	3.58847
ENSG00000007516.9	BAIAP3	protein_coding	chr16	1383602	1399439	+	34	16	6143	28.4285	27.8959	40.9266	27.2126	26.7568	41.7152	3.81299	3.3925	6.37575	4.22931	3.75751	7.19763
ENSG00000007520.3	TSR3	protein_coding	chr16	1399241	1401912	-	6	2	1243	45.4295	46.0963	47.1862	47.0133	47.7522	49.6157	41.8077	42.7022	43.6177	52.9949	54.2453	56.1056
ENSG00000007866.14	TEAD3	protein_coding	chr6	35441374	35464853	-	14	3	3046	2.4809	2.52282	2.64482	2.26104	2.22167	2.37019	14.4891	14.5084	14.9256	15.7142	15.3966	15.7783
ENSG00000007923.11	DNAJC11	protein_coding	chr1	6694228	6761984	-	20	14	5147	19.0195	19.0545	32.6623	18.462	18.3052	31.7557	29.7085	28.8259	49.8393	30.5595	29.963	52.3867
ENSG00000007968.6	E2F2	protein_coding	chr1	23832922	23857712	-	7	2	5457	0.0295535	0.0308043	0.0323827	0.0293505	0.0305657	0.032132	11.0792	11.0692	12.1235	11.3562	11.397	12.5901
ENSG00000008018.8	PSMB1	protein_coding	chr6	170844205	170862429	-	6	2	2256	48.57	48.2198	113.801	47.1612	46.9064	110.48	116.04	117.85	278.548	114.249	116.032	274.65
ENSG00000008056.8	SYN1	protein_coding	chrX	47431303	47479252	-	13	2	3203	279.569	287.195	288.845	270.583	278.357	279.885	1.40876	1.44496	1.45861	1.18795	1.17609	1.18177
ENSG00000008118.5	CAMK1G	protein_coding	chr1	209757062	209787283	+	13	4	2676	36.4613	36.5865	40.2011	34.7829	34.6826	37.8949	0.814679	0.820287	0.899627	0.833216	0.831394	0.911807
ENSG00000008130.11	NADK	protein_coding	chr1	1682671	1711896	-	17	19	5637	9.899	9.33385	24.2885	9.06382	8.52184	20.9533	25.2823	23.8524	72.5501	25.9125	24.0082	72.1637
ENSG00000008196.8	TFAP2B	protein_coding	chr6	50786436	50815326	+	8	4	6149	1.7048	1.62073	1.72346	1.7675	1.76318	1.95551	0.469975	0.447304	0.923147	0.500559	0.468717	0.6493
ENSG00000008277.10	ADAM22	protein_coding	chr7	87563458	87832204	+	36	12	12217	27.9422	28.3621	42.961	32.1795	32.6382	48.7702	2.28453	2.31629	4.72158	1.97187	1.97835	3.62931
ENSG00000008282.3	SYPL1	protein_coding	chr7	105730949	105753022	-	7	6	2794	21.9671	22.4498	33.0114	24.6497	25.2354	36.9535	49.0664	49.4577	78.1922	44.9757	45.5871	71.9907
ENSG00000008283.11	CYB561	protein_coding	chr17	61509665	61523739	-	13	21	5320	15.4041	15.6137	28.7411	13.479	13.6922	24.6655	24.1585	24.1203	47.5403	24.3769	24.5501	48.5637
ENSG00000008311.10	AASS	protein_coding	chr7	121715701	121784334	-	24	7	4591	4.05982	3.84979	6.59938	4.63995	4.33381	7.50235	7.28302	6.87814	11.2536	6.78346	6.61372	10.358
ENSG00000008323.11	PLEKHG6	protein_coding	chr12	6419602	6437672	+	20	9	4260	0	0	0	0	0	0	1.98752	1.9742	3.41068	2.15049	2.1187	3.86641
ENSG00000008324.6	SS18L2	protein_coding	chr3	42623332	42636606	+	4	3	1301	19.3734	19.215	30.2424	22.5466	22.363	35.4427	20.3616	20.2265	32.5089	19.9325	19.6659	31.2473
ENSG00000008382.11	MPND	protein_coding	chr19	4343524	4360083	+	13	8	2049	15.5056	15.5523	21.8468	15.198	15.0365	23.2613	13.4357	13.1653	21.3596	13.1292	13.079	18.3157
ENSG00000008405.7	CRY1	protein_coding	chr12	107385142	107487607	-	14	5	5062	11.8609	11.8268	19.7364	12.0054	12.1353	21.7256	12.1491	12.2517	19.765	11.2848	11.4023	18.8551
ENSG00000008441.12	NFIX	protein_coding	chr19	13106422	13209610	+	15	14	6302	91.4471	91.0646	140.003	89.853	89.3122	135.902	22.0755	22.3678	36.6362	23.0397	23.3402	37.6608
ENSG00000008513.10	ST3GAL1	protein_coding	chr8	134467091	134584183	-	15	16	8730	5.27814	5.27595	7.55354	5.04268	5.0031	7.62974	13.7638	13.8687	20.2082	14.2	14.3496	21.7243
ENSG00000008516.12	MMP25	protein_coding	chr16	3096682	3110727	+	11	3	4126	0.234523	0.238628	0.277034	0.316094	0.300307	0.34864	1.27793	1.2435	1.44364	1.30401	1.29902	1.50809
ENSG00000008735.10	MAPK8IP2	protein_coding	chr22	51039114	51052409	+	14	6	6107	99.362	98.7579	181.087	94.2731	93.8066	175.285	1.66037	1.70625	3.28976	1.96441	1.96642	3.69321
ENSG00000008853.12	RHOBTB2	protein_coding	chr8	22844930	22877712	+	16	8	6580	27.5034	28.1965	37.5633	27.5265	28.123	37.0465	8.11347	8.29981	11.5044	9.04235	9.25979	13.2134
ENSG00000008869.7	HEATR5B	protein_coding	chr2	37195526	37311485	-	37	6	8206	11.6515	11.7759	14.3442	12.4693	12.5181	15.005	7.77236	7.69299	9.7877	7.84131	7.77929	10.3771
ENSG00000008952.12	SEC62	protein_coding	chr3	169684423	169716161	+	11	10	7928	33.3468	33.6282	99.4917	38.6185	39.0454	104.033	17.8804	18.1005	67.4373	16.9876	17.1437	63.2417
ENSG00000009307.11	CSDE1	protein_coding	chr1	115259534	115301297	-	25	17	5755	117.433	117.642	196.056	120.769	121.074	198.424	239.75	241.767	436.323	225.167	226.782	425.527
ENSG00000009709.7	PAX7	protein_coding	chr1	18957500	19075360	+	9	3	6313	1.02185	1.04227	1.18813	1.03658	1.06062	1.20905	0.0120465	0.0125678	0.0161594	0.011517	0.00400474	0.00456517
ENSG00000009724.12	MASP2	protein_coding	chr1	11086580	11107290	-	10	4	4251	0.0270984	0.0282453	0.165386	0.0107649	0.0112106	0.0195393	0.805038	0.777666	2.08024	0.895085	0.862357	2.3504
ENSG00000009790.10	TRAF3IP3	protein_coding	chr1	209929377	209955668	+	15	18	7753	0.234759	0.207526	0.698361	0.230195	0.208992	0.744801	2.12202	2.08764	9.05315	2.10066	2.02829	8.48887
ENSG00000009830.7	POMT2	protein_coding	chr14	77741299	77787227	-	26	23	10012	5.85872	5.76128	18.3497	5.95787	5.70477	17.3921	5.11198	5.01888	22.5223	5.35693	5.18921	22.5661
ENSG00000009844.11	VTA1	protein_coding	chr6	142468367	142545826	+	8	4	7194	10.4211	10.6518	29.6379	11.7171	11.9836	30.5914	11.8539	12.1279	41.8705	11.5013	11.8256	43.331
ENSG00000009950.11	MLXIPL	protein_coding	chr7	73007524	73038873	-	14	12	4815	17.838	16.9071	38.3137	16.4371	15.6133	34.6015	11.3666	10.76	25.5752	11.1036	10.5171	23.5658
ENSG00000009954.6	BAZ1B	protein_coding	chr7	72854728	72936608	-	19	3	7053	24.2935	23.9664	28.7465	25.0251	24.8518	30.113	55.009	54.6936	66.8853	52.2341	52.1303	63.7207
ENSG00000010017.9	RANBP9	protein_coding	chr6	13621730	13711796	-	15	3	3480	37.4783	37.0839	52.8722	39.5351	38.4469	53.0751	38.6875	38.0288	56.5594	35.3577	33.978	51.3283
ENSG00000010072.11	SPRTN	protein_coding	chr1	231472850	231490769	+	6	6	5906	1.75153	1.77687	3.82638	1.50705	1.49683	2.79943	3.94024	3.99434	12.0531	3.38955	3.39461	8.44477
ENSG00000010256.6	UQCRC1	protein_coding	chr3	48636435	48648409	-	11	10	3236	81.2776	82.0161	176.665	75.8969	76.1162	178.32	87.2436	87.5133	204.858	89.8054	90.393	206.385
ENSG00000010270.9	STARD3NL	protein_coding	chr7	38217824	38270272	+	11	8	4348	14.9638	15.1165	41.6024	14.8925	15.1694	41.5145	13.4853	13.6553	40.9035	13.0264	13.1992	38.5768
ENSG00000010278.7	CD9	protein_coding	chr12	6308881	6347425	+	12	11	3218	48.1902	47.2074	140.907	47.3827	47.4416	141.536	58.4431	58.474	176.83	58.842	58.601	178.186
ENSG00000010295.15	IFFO1	protein_coding	chr12	6647541	6665239	-	12	10	5193	17.8794	17.3135	39.8222	15.9456	15.4908	34.4931	9.77282	9.4624	19.5757	10.5334	10.2432	21.725
ENSG00000010318.15	PHF7	protein_coding	chr3	52444673	52457657	+	9	9	3367	3.81818	2.36076	9.66764	3.19393	2.20802	7.57819	5.08953	4.14729	14.7418	5.67203	4.64791	14.6486
ENSG00000010319.2	SEMA3G	protein_coding	chr3	52467069	52479101	-	17	3	5011	13.0115	12.7379	13.5972	11.9541	11.6882	12.926	3.52094	3.53082	3.78308	3.21144	3.28953	3.64819
ENSG00000010322.11	NISCH	protein_coding	chr3	52489134	52527087	+	23	14	9161	76.0408	75.0281	165.354	73.71	73.1804	163.61	18.4928	18.0633	44.7222	19.3044	18.8241	46.1268
ENSG00000010327.6	STAB1	protein_coding	chr3	52529354	52558511	+	56	9	10588	4.0734	3.87383	11.7672	3.60456	3.32622	12.2592	0.179565	0.167354	0.75307	0.119027	0.100287	0.352687
ENSG00000010361.9	FUZ	protein_coding	chr19	50310126	50320633	-	14	19	2951	15.5051	13.3538	31.1067	13.6153	12.0392	27.9031	8.55587	7.32195	17.5744	9.20645	7.87329	18.7697
ENSG00000010539.7	ZNF200	protein_coding	chr16	3272325	3286221	-	6	10	7498	1.733	1.73268	4.90117	1.69973	1.75104	5.10338	4.19904	4.25379	13.7427	3.87551	3.89108	11.4554
ENSG00000010610.5	CD4	protein_coding	chr12	6896024	6929974	+	14	12	4583	4.7908	4.82064	7.45876	4.33352	4.40897	6.65875	3.99357	3.9702	6.3822	3.99257	4.04908	6.46007
ENSG00000010671.11	BTK	protein_coding	chrX	100604435	100641183	-	20	8	4227	0.812119	0.727184	1.22824	1.06636	0.975225	2.0578	9.01965	8.59664	15.6451	8.17604	7.85911	15.6386
ENSG00000010704.14	HFE	protein_coding	chr6	26087509	26098571	+	5	14	5675	0.702337	0.689745	1.65612	0.479791	0.495458	0.854953	3.61374	3.69557	8.70902	3.17306	3.19421	8.1019
ENSG00000010803.12	SCMH1	protein_coding	chr1	41492872	41707826	-	21	17	4447	11.4651	11.1619	16.3882	11.4018	11.2845	16.9786	17.5573	16.9671	29.425	18.3825	17.715	29.6698
ENSG00000010810.13	FYN	protein_coding	chr6	111981535	112194655	-	29	31	7411	33.811	33.8971	122.703	33.7237	33.7761	125.901	12.7484	12.7399	63.0291	12.8749	12.8951	59.4846
ENSG00000010818.4	HIVEP2	protein_coding	chr6	143072604	143266338	-	11	4	9774	27.2137	27.9575	28.5006	27.1039	27.9214	28.9323	7.02345	7.17588	7.32111	6.70239	6.87532	7.01226
ENSG00000011007.8	TCEB3	protein_coding	chr1	24069645	24088549	+	12	3	5391	12.479	12.7309	14.0518	12.1937	12.4069	13.0947	25.6319	26.2065	40.4374	24.1773	24.7379	38.814
ENSG00000011009.6	LYPLA2	protein_coding	chr1	24117460	24122029	+	9	11	2196	21.2661	20.9631	30.3962	19.3278	18.609	28.9238	43.2539	43.2953	66.661	47.6768	47.8238	72.562
ENSG00000011083.4	SLC6A7	protein_coding	chr5	149569520	149602351	+	16	3	4391	34.2517	31.8949	42.9356	31.6662	29.4935	37.7108	0.16742	0.168643	0.198051	0.0993493	0.0806074	0.0946635
ENSG00000011114.10	BTBD7	protein_coding	chr14	93703896	93799438	-	13	9	11333	2.59807	2.59148	4.33756	2.81644	2.81531	5.92117	5.11111	5.08028	9.28158	5.10676	5.09743	10.1531
ENSG00000011143.12	MKS1	protein_coding	chr17	56282803	56296966	-	18	15	4073	5.04564	4.43963	11.8499	4.49414	3.96649	9.80626	11.8876	10.7073	25.0508	13.0669	12.1165	30.9661
ENSG00000011198.3	ABHD5	protein_coding	chr3	43731605	43775863	+	12	7	3172	5.05524	4.82251	9.56557	5.09984	4.75512	8.97279	9.49417	8.98793	17.3395	9.65761	9.3253	18.6363
ENSG00000011201.6	KAL1	protein_coding	chrX	8496915	8700227	-	15	3	7131	3.86731	3.9872	4.54858	3.8632	3.99642	4.70932	1.40773	1.45011	2.22353	1.16913	1.1806	1.6617
ENSG00000011243.13	AKAP8L	protein_coding	chr19	15490859	15529952	-	16	20	5081	46.4455	43.6092	131.696	41.8618	40.0872	123.483	31.1172	30.1008	86.4121	33.8852	32.671	95.5664
ENSG00000011260.9	UTP18	protein_coding	chr17	49337889	49375297	+	16	7	2721	19.5252	19.1248	29.1866	20.3917	19.905	30.7884	44.1315	43.4755	65.84	43.6261	43.5395	66.1769
ENSG00000011332.15	DPF1	protein_coding	chr19	38701646	38720354	-	16	16	4800	12.2827	12.1221	30.0974	10.8159	10.3801	26.1086	1.71111	1.6915	5.53874	1.68135	1.62226	4.06066
ENSG00000011376.5	LARS2	protein_coding	chr3	45429998	45590913	+	25	8	5393	10.4238	10.6467	13.5585	10.0636	10.255	13.1406	17.923	18.4289	24.0824	17.4769	17.861	23.3494
ENSG00000011426.6	ANLN	protein_coding	chr7	36429415	36493400	+	28	13	6012	39.483	39.3884	74.062	41.4077	41.513	74.301	50.8049	50.9625	70.7491	48.5359	48.5622	69.5288
ENSG00000011451.13	WIZ	protein_coding	chr19	15532319	15560762	-	15	8	8155	12.9957	13.1658	27.7078	11.366	11.3867	23.55	18.0075	18.0247	40.1712	18.8061	18.8305	41.58
ENSG00000011465.12	DCN	protein_coding	chr12	91539025	91576900	-	15	22	8083	9.9191	10.1487	52.1752	10.0095	10.2293	50.1697	13.0308	13.2382	81.0323	13.1958	13.5152	79.2624
ENSG00000011478.7	QPCTL	protein_coding	chr19	46195741	46207247	+	7	4	2396	6.75019	6.50466	7.61225	7.05713	6.57363	7.0229	16.3991	15.7842	18.0844	16.0627	15.3317	16.8058
ENSG00000011485.10	PPP5C	protein_coding	chr19	46850251	46896238	+	11	15	7059	20.1931	20.3128	74.2091	19.312	19.5446	69.0759	20.6885	20.8945	80.4639	21.3346	21.4604	81.9149
ENSG00000011523.9	CEP68	protein_coding	chr2	65283500	65314138	+	7	6	8623	11.8362	11.5127	17.5089	12.9648	12.5952	19.0688	5.1358	4.95323	9.7105	4.6712	4.55034	9.45864
ENSG00000011600.7	TYROBP	protein_coding	chr19	36395303	36399197	-	3	9	907	18.416	18.1363	29.3748	14.7577	14.8171	23.7862	0.698726	0.641489	1.0239	1.22915	1.22647	1.96701
ENSG00000011638.6	TMEM159	protein_coding	chr16	21169698	21191937	+	9	9	2558	8.85357	8.55233	14.4443	9.35625	9.19406	14.6929	9.54332	9.61516	16.4394	8.41333	8.34165	15.9141
ENSG00000012048.15	BRCA1	protein_coding	chr17	41196312	41277500	-	26	31	8278	0.851651	0.844178	1.89456	1.16643	1.18882	3.09681	16.6436	16.6291	34.6334	15.8478	15.8172	35.8593
ENSG00000012061.11	ERCC1	protein_coding	chr19	45910591	45982086	-	17	17	5576	17.8702	17.3904	56.7581	17.0293	16.4139	54.8902	16.2437	16.1925	61.4262	18.1637	18.0229	70.5802
ENSG00000012171.13	SEMA3B	processed_transcript	chr3	50304990	50314977	+	12	16	5767	33.6897	32.9085	77.0112	31.2721	30.5837	70.6439	27.6311	26.5477	61.689	30.0561	28.8197	64.2306
ENSG00000012211.8	PRICKLE3	protein_coding	chrX	49031151	49042845	-	10	8	3396	1.1601	1.11726	1.89127	0.896096	0.806902	1.10057	8.94259	8.75332	13.1996	9.27751	8.89632	13.9192
ENSG00000012223.8	LTF	protein_coding	chr3	46477136	46526724	-	24	10	4247	0.819144	0.831193	1.36076	1.1637	1.15578	2.0075	8.64292	7.93343	13.5393	7.36715	6.93512	11.7284
ENSG00000012232.4	EXTL3	protein_coding	chr8	28457986	28613116	+	18	14	13220	11.8106	12.1778	24.9788	12.0929	12.4692	25.1556	7.33456	7.57396	15.5295	7.31838	7.54633	15.6751
ENSG00000012504.9	NR1H4	protein_coding	chr12	100867486	100958191	+	14	9	3460	0.0133174	0.013881	0.0166533	0.00661294	0.00688676	0.0160028	2.68151	2.63704	5.19793	1.91924	1.92903	3.26012
ENSG00000012779.6	ALOX5	protein_coding	chr10	45869661	45941561	+	14	7	3685	12.3229	12.0168	22.7071	11.5304	11.1931	19.5967	0.846139	0.753574	1.55878	1.18383	1.10458	2.25932
ENSG00000012817.11	KDM5D	protein_coding	chrY	21865751	21906825	-	26	10	9463	10.6954	10.4477	19.3931	10.7452	10.6211	24.5154	4.10397	4.00769	10.1093	3.87239	3.77239	9.35564
ENSG00000012822.11	CALCOCO1	protein_coding	chr12	54104903	54121529	-	14	22	6296	50.5718	50.6028	142.802	49.5738	49.5222	138.869	14.5391	14.4542	39.1711	15.7709	15.9217	42.2068
ENSG00000013016.10	EHD3	protein_coding	chr2	31456880	31492313	+	6	2	4959	55.7231	57.0208	69.9722	52.5672	53.7588	66.6459	3.79301	3.92516	4.69197	4.10526	4.18561	4.85196
ENSG00000013275.3	PSMC4	protein_coding	chr19	40476912	40487348	+	9	6	2387	46.9662	47.4246	73.8095	47.2952	48.1155	75.5465	73.851	75.4184	117.975	78.6163	80.4001	125.458
ENSG00000013288.4	MAN2B2	protein_coding	chr4	6576902	6625089	+	18	5	8898	10.3078	10.5605	16.846	9.71494	9.92707	16.0538	10.0881	10.3493	16.5159	10.1867	10.4134	17.1763
ENSG00000013293.5	SLC7A14	protein_coding	chr3	170177372	170303863	-	9	2	10459	12.5912	12.8738	13.3274	13.1654	13.428	13.9011	0.276305	0.278148	0.28795	0.18306	0.186128	0.243634
ENSG00000013306.11	SLC25A39	protein_coding	chr17	42396993	42402238	-	8	17	3526	25.6919	25.0017	57.7608	25.0417	23.9768	54.8814	94.3031	94.5966	213.594	102.222	101.909	232.849
ENSG00000013374.11	NUB1	protein_coding	chr7	151038785	151075535	+	18	14	5411	17.5763	17.3615	37.4685	17.6839	17.531	37.8547	24.6049	24.2572	67.8088	23.2235	22.6794	62.4458
ENSG00000013375.11	PGM3	protein_coding	chr6	83870869	83903655	-	17	14	7331	6.9705	6.80362	12.5013	8.0774	7.76504	11.9393	14.4505	14.3905	32.7572	13.465	13.3393	33.7461
ENSG00000013392.6	RWDD2A	protein_coding	chr6	83903098	83908651	+	2	2	4686	7.87145	7.86634	11.1374	7.79294	7.79526	11.1137	3.04024	2.9122	4.54287	2.60666	2.53035	4.10647
ENSG00000013503.5	POLR3B	protein_coding	chr12	106751436	106903976	+	31	4	4858	4.29197	4.06826	4.91651	4.75231	4.67931	5.40883	7.57675	7.61613	8.81825	7.0991	7.02044	8.01637
ENSG00000013523.5	ANGEL1	protein_coding	chr14	77253588	77292589	-	14	6	5347	13.9949	14.1112	21.4364	13.3596	13.3869	20.8259	12.7673	12.9143	18.3587	13.2261	13.3147	19.3703
ENSG00000013561.13	RNF14	protein_coding	chr5	141337893	141369856	+	12	18	4834	18.5304	18.6489	38.034	19.1462	19.2045	37.7774	11.3376	11.3742	28.6803	10.8143	10.8994	25.4449
ENSG00000013563.9	DNASE1L1	protein_coding	chrX	153629579	153640449	-	9	12	4130	6.62723	6.48323	11.4135	6.88639	6.86575	13.0613	12.6503	12.5959	25.771	12.5873	12.5736	25.0376
ENSG00000013573.12	DDX11	protein_coding	chr12	31226779	31257725	+	29	32	8374	3.1612	2.94513	9.55481	3.14768	2.98492	10.3418	22.4104	21.1253	70.0592	23.7148	22.2538	75.0354
ENSG00000013583.4	HEBP1	protein_coding	chr12	13127798	13153207	-	7	4	3442	14.4915	14.8675	43.7191	13.295	13.5894	39.6985	14.7886	15.2058	44.3346	15.561	15.9977	46.7874
ENSG00000013619.9	MAMLD1	protein_coding	chrX	149529689	149682448	+	11	8	5958	6.87538	6.99303	10.1254	7.31586	7.4788	11.0717	5.84176	5.9703	9.82282	5.27182	5.32966	8.12645
ENSG00000013725.10	CD6	protein_coding	chr11	60739115	60787849	+	15	16	5995	0.64179	0.632899	1.16734	0.461814	0.445164	1.12068	3.44199	3.3792	6.79108	2.66815	2.54717	5.56648
ENSG00000014123.9	UFL1	protein_coding	chr6	96969471	97003152	+	20	2	4539	10.9637	10.4014	11.7473	11.9621	11.6122	12.8632	16.8217	16.5242	18.2219	15.5004	14.855	16.1129
ENSG00000014138.4	POLA2	protein_coding	chr11	65029233	65073060	+	19	9	5726	3.22692	3.1454	7.46168	3.33262	3.29583	7.59305	18.0052	17.5512	56.1995	18.7545	18.4206	58.1999
ENSG00000014164.6	ZC3H3	protein_coding	chr8	144519825	144623623	-	13	2	3731	10.7014	10.6007	12.0583	9.84897	9.93745	11.3766	15.3688	15.07	17.1421	16.6422	16.6287	18.9538
ENSG00000014216.11	CAPN1	protein_coding	chr11	64948037	64979477	+	24	28	7553	23.036	23.019	64.1016	22.1295	21.9889	60.8559	31.8743	32.0072	89.6184	33.7144	33.8175	93.9973
ENSG00000014641.13	MDH1	protein_coding	chr2	63815743	63834331	+	14	17	4993	160.406	164.458	652.729	159.267	163.123	643.703	53.8016	54.9171	217.821	52.2818	53.2424	209.962
ENSG00000014914.15	MTMR11	protein_coding	chr1	149900543	149908791	-	13	12	4591	4.00964	3.57256	8.10396	4.25619	3.60718	7.85232	6.38852	5.89884	11.9286	6.01274	5.56191	11.5434
ENSG00000014919.8	COX15	protein_coding	chr10	101471601	101491857	-	10	3	4177	11.925	11.1821	19.2151	12.336	11.626	19.6251	22.5824	21.4766	36.4215	20.6964	19.5077	32.8492
ENSG00000015133.14	CCDC88C	protein_coding	chr14	91737667	91884188	-	35	14	12426	0.978967	0.989476	3.09863	0.841503	0.85717	2.41844	5.89169	5.88701	15.8809	5.99359	6.01834	15.4189
ENSG00000015153.10	YAF2	protein_coding	chr12	42550906	42632151	-	11	21	10840	2.97128	2.94195	24.0407	3.40257	3.31045	24.0737	1.55747	1.48093	15.5927	1.29227	1.26876	12.8185
ENSG00000015171.14	ZMYND11	protein_coding	chr10	180405	300577	+	20	19	5300	41.3921	41.8842	72.452	46.0724	46.5099	68.705	16.9078	17.1106	33.9595	15.3645	15.546	29.857
ENSG00000015285.6	WAS	protein_coding	chrX	48534985	48549818	+	14	7	2381	3.73502	3.22743	4.34996	3.34419	3.05233	4.07998	14.1069	13.1512	19.5584	15.7364	15.0991	21.2419
ENSG00000015413.5	DPEP1	protein_coding	chr16	89679716	89704839	+	12	9	2712	0.033981	0.035419	0.161321	0.0506212	0.0527172	0.235997	1.04689	1.03369	1.77538	1.28685	1.20257	2.15412
ENSG00000015520.10	NPC1L1	protein_coding	chr7	44552134	44580914	-	20	4	5252	0.285137	0.28806	0.299701	0.374666	0.358421	0.399434	1.83414	1.73224	1.85941	1.9335	1.91107	2.12636
ENSG00000015532.5	XYLT2	protein_coding	chr17	48423453	48440499	+	12	7	5472	7.43971	7.47369	12.789	7.12933	7.10665	11.7662	13.8701	13.9629	23.6264	14.3014	14.4336	23.9415
ENSG00000015592.12	STMN4	protein_coding	chr8	27092840	27115937	-	8	7	3294	108.824	111.191	271.574	110.333	112.978	274.727	0.100045	0.104374	0.257098	0.0441452	0.0460509	0.121353
ENSG00000015676.13	NUDCD3	protein_coding	chr7	44418720	44530479	-	14	11	10113	42.1005	43.2981	136.583	40.9492	42.1806	134.324	17.7045	18.0549	66.0776	18.3332	18.6921	70.4616
ENSG00000016391.6	CHDH	protein_coding	chr3	53846362	53880417	-	11	3	7758	7.49855	7.41967	7.6948	7.69181	7.66937	7.76242	6.02539	5.8839	6.03853	5.96989	5.81048	6.62373
ENSG00000016402.8	IL20RA	protein_coding	chr6	137321108	137366298	-	10	7	4673	2.87927	2.94459	5.86383	2.45309	2.48327	5.68555	0.249538	0.260337	0.488879	0.19708	0.173127	0.435602
ENSG00000016602.8	CLCA4	protein_coding	chr1	87012761	87046437	+	14	3	3649	2.48764	2.36916	2.81161	2.97218	2.63814	3.30857	0.00694704	0.0072477	0.0164881	0.0132835	0.0138569	0.0157471
ENSG00000016864.12	GLT8D1	protein_coding	chr3	52728505	52740048	-	13	17	3783	15.9258	15.5968	42.6351	14.516	13.7691	36.2443	29.424	29.0615	85.3095	28.0476	27.8081	75.3697
ENSG00000017260.15	ATP2C1	protein_coding	chr3	130569439	130735556	+	34	25	8533	23.6736	23.8368	65.8053	26.6375	26.8077	80.6398	19.1765	19.4423	56.0381	17.5754	17.5756	50.1165
ENSG00000017373.11	SRCIN1	protein_coding	chr17	36686251	36762183	-	27	9	11025	31.2956	30.6989	58.4701	30.1943	29.7069	58.7634	1.12896	1.01709	3.28163	1.29917	1.19473	3.66952
ENSG00000017427.11	IGF1	protein_coding	chr12	102789645	102874423	-	7	7	8087	0.561234	0.56123	0.748633	0.517767	0.512687	1.06157	0.46706	0.474192	0.848733	0.302684	0.315751	1.13164
ENSG00000017483.10	SLC38A5	protein_coding	chrX	48316920	48328644	-	20	13	4016	7.43493	6.91243	17.7867	6.5919	6.20031	15.6595	25.274	25.0047	65.8635	26.8307	26.2892	68.592
ENSG00000017621.11	MAGIX	protein_coding	chrX	49019061	49024822	+	4	9	4948	3.10106	3.12552	7.73717	3.04275	2.99056	8.6298	0.379119	0.352767	1.01304	0.538789	0.521171	1.49516
ENSG00000018189.8	RUFY3	protein_coding	chr4	71569921	71673032	+	24	16	8070	43.4431	43.1629	105.6	46.8049	47.0009	108.194	6.61544	6.04312	22.376	6.17755	5.61716	22.1343
ENSG00000018280.12	SLC11A1	protein_coding	chr2	219246752	219261617	+	10	19	8676	2.81217	2.67654	10.8892	2.52121	2.37568	8.90673	0.140248	0.131076	0.313382	0.162018	0.166098	0.51726
ENSG00000018510.8	AGPS	protein_coding	chr2	178257372	178408564	+	20	3	8197	6.2144	6.24303	7.04437	6.74113	6.68596	7.99999	15.7504	15.8546	18.8139	15.212	15.3104	19.7376
ENSG00000018610.9	CXorf56	protein_coding	chrX	118672112	118699397	-	7	4	2606	11.0421	11.1409	14.2153	12.5642	12.737	16.1467	13.7449	14.015	18.0003	14.7776	15.1827	18.5037
ENSG00000018625.10	ATP1A2	protein_coding	chr1	160085549	160113381	+	23	8	6298	232.582	235.935	300.747	229.829	232.758	290.956	2.53578	2.51955	3.08394	2.45897	2.49287	3.21893
ENSG00000019169.9	MARCO	protein_coding	chr2	119699742	119752236	+	18	4	2079	1.17467	1.20128	1.3588	1.23263	1.27221	1.70477	0.0731595	0.0508838	0.0625323	0.0582869	0.0608031	0.103346
ENSG00000019186.5	CYP24A1	protein_coding	chr20	52769988	52790512	-	12	6	3972	0.104407	0.108825	0.228944	0.22466	0.233962	0.514976	7.39049	7.16435	14.1031	7.24264	6.8806	12.9498
ENSG00000019485.8	PRDM11	protein_coding	chr11	45115564	45247734	+	13	6	5527	3.67242	3.44983	6.80674	3.6182	3.42312	7.39558	2.10522	1.99536	4.52725	1.78907	1.65131	4.48744
ENSG00000019505.3	SYT13	protein_coding	chr11	45261852	45307870	-	9	3	5424	50.7718	52.2564	55.5387	51.5155	52.8929	55.772	1.56567	1.58954	1.7582	1.28685	1.31444	1.38598
ENSG00000019549.4	SNAI2	protein_coding	chr8	49830249	49834299	-	4	2	2282	1.93843	1.92576	2.10469	2.17578	2.17189	2.37369	11.9417	12.1109	13.2127	11.0133	10.9459	11.9517
ENSG00000019582.10	CD74	protein_coding	chr5	149781200	149792492	-	8	12	3184	111.078	113.667	287.699	105.443	108.267	274.011	46.6312	48.1924	116.003	48.2278	49.7698	120.687
ENSG00000019991.11	HGF	protein_coding	chr7	81328322	81399754	-	21	10	8897	0.800166	0.798941	2.15132	0.928398	0.95077	2.44305	5.22267	5.27629	15.6873	4.65809	4.67163	13.9206
ENSG00000020129.11	NCDN	protein_coding	chr1	36023074	36032875	+	9	6	4917	288.483	293.815	417.959	267.682	273.285	390.328	17.9	17.5021	28.1026	18.6758	18.284	28.6556
ENSG00000020181.13	GPR124	protein_coding	chr8	37641709	37702414	+	20	3	7061	4.9824	4.84295	6.02797	4.91899	4.78521	5.9602	11.036	11.0754	13.758	11.7489	11.8515	14.7269
ENSG00000020577.9	SAMD4A	protein_coding	chr14	55033815	55260033	+	22	13	12170	8.99225	8.96435	18.0066	9.66558	9.65658	19.6217	3.88266	3.87467	8.16285	3.72198	3.6853	8.25057
ENSG00000020633.14	RUNX3	protein_coding	chr1	25226002	25291612	-	9	6	4605	0.475291	0.479761	0.572209	0.357745	0.372558	0.495093	9.39125	9.58519	11.5554	9.84691	9.93709	11.9721
ENSG00000021300.9	PLEKHB1	protein_coding	chr11	73357223	73373864	+	14	22	4933	220.868	227.455	584.771	210.384	216.68	567.55	3.50981	3.61882	10.2548	3.62086	3.68492	9.38429
ENSG00000021355.8	SERPINB1	protein_coding	chr6	2832566	2842240	-	9	6	3226	8.08439	8.02456	13.5623	8.66717	8.34651	14.0919	28.6265	28.4882	56.5874	27.2783	27.1628	52.4027
ENSG00000021574.7	SPAST	protein_coding	chr2	32288680	32382706	+	17	2	5213	7.60604	7.54098	7.68294	9.78347	9.67206	9.8542	6.94408	6.81845	6.94654	6.54592	6.48416	6.60591
ENSG00000021762.15	OSBPL5	protein_coding	chr11	3108346	3187969	-	26	20	7466	5.52679	5.19459	13.4628	5.2467	4.84159	11.5967	5.03532	4.74315	14.1544	5.14514	4.75433	11.896
ENSG00000021776.6	AQR	protein_coding	chr15	35147732	35262040	-	34	6	9779	4.71195	4.72228	11.1324	4.64214	4.66378	11.7258	11.5615	11.7319	25.805	11.4375	11.6004	25.9114
ENSG00000021826.10	CPS1	protein_coding	chr2	211342406	211543831	+	42	11	10444	0.774294	0.793266	1.78636	1.03844	1.07688	2.02833	75.4182	77.14	143.899	70.9899	72.6964	135.366
ENSG00000021852.8	C8B	protein_coding	chr1	57394883	57431813	-	14	6	2729	0	0	0	0	0	0	1.54198	1.55057	2.07732	1.56302	1.56565	2.12544
ENSG00000022267.12	FHL1	protein_coding	chrX	135229559	135293518	+	15	18	4945	70.939	71.3139	151.53	72.4596	72.8964	155.929	23.5043	23.8797	49.9683	22.2802	22.6234	48.7818
ENSG00000022355.10	GABRA1	protein_coding	chr5	161274197	161326975	+	14	10	5494	56.8723	57.675	113.043	68.0509	69.4938	119.757	0.0322986	0.0240689	0.0980734	0.0661696	0.0598225	0.205014
ENSG00000022840.11	RNF10	protein_coding	chr12	120971283	121015397	+	23	25	5911	48.0582	48.3207	130.782	45.9551	46.4712	123.125	44.2538	44.5852	105.11	44.974	45.2945	113.123
ENSG00000023041.7	ZDHHC6	protein_coding	chr10	114190058	114206672	-	12	4	2404	17.471	16.8418	19.1436	15.9518	15.4923	17.7974	32.2566	28.8011	39.7247	32.573	29.0364	38.2889
ENSG00000023171.10	GRAMD1B	protein_coding	chr11	123396344	123498482	+	23	8	9770	51.9453	52.5582	70.7481	51.7241	52.2586	69.5535	12.789	12.7768	19.1952	12.3436	12.3486	19.1828
ENSG00000023191.12	RNH1	protein_coding	chr11	494512	507300	-	11	24	7367	21.9258	22.0844	87.6553	20.1942	20.4223	80.2034	25.7352	26.1309	103.511	28.8348	29.0637	116.235
ENSG00000023287.8	RB1CC1	protein_coding	chr8	53535016	53658403	-	26	11	7615	24.2009	24.4115	37.4001	28.4785	28.8254	41.5577	15.586	15.6875	23.6532	13.6057	13.7349	21.4414
ENSG00000023330.10	ALAS1	protein_coding	chr3	52232102	52248343	+	12	6	2536	50.339	51.2762	60.6862	49.2442	50.2309	58.2951	32.6668	32.9439	38.6552	33.8306	34.3539	39.5675
ENSG00000023445.9	BIRC3	protein_coding	chr11	102188215	102210134	+	12	6	7484	1.04975	1.05246	1.61155	1.00279	1.02839	1.60972	4.93853	5.05331	8.62314	4.75064	4.87126	7.95499
ENSG00000023516.7	AKAP11	protein_coding	chr13	42846289	42897396	+	13	1	9913	27.7989	28.1178	28.1178	31.5825	32.2893	32.2893	9.38246	9.3323	9.3323	8.84788	8.82177	8.82177
ENSG00000023572.4	GLRX2	protein_coding	chr1	193065598	193075244	-	5	3	1299	9.2582	9.02147	16.6222	9.63494	9.22677	17.0978	10.4014	10.1186	18.7505	10.4853	10.1206	18.7541
ENSG00000023697.8	DERA	protein_coding	chr12	16064106	16190220	+	14	10	2848	7.14309	7.20086	18.7935	6.68427	6.69331	16.5121	23.8544	23.8282	57.5501	24.2187	24.3587	61.5437
ENSG00000023734.6	STRAP	protein_coding	chr12	16035325	16056412	+	11	7	2211	88.5718	81.4264	97.1359	94.9174	87.1329	104.77	145.414	134.005	160.402	139.013	129.12	156.218
ENSG00000023839.6	ABCC2	protein_coding	chr10	101542489	101611949	+	32	3	6232	0.207027	0.215788	0.253161	0.179903	0.168235	0.197372	29.2791	27.4526	32.2072	27.3118	25.7606	30.434
ENSG00000023892.9	DEF6	protein_coding	chr6	35265595	35289548	+	12	4	2675	2.05845	1.84033	2.36871	2.02719	1.89735	2.40437	21.8055	21.4936	29.7742	24.9786	24.2801	33.6579
ENSG00000023902.9	PLEKHO1	protein_coding	chr1	150121373	150136916	+	9	10	6629	14.8612	14.8381	59.4346	13.8893	13.8893	54.5293	7.60608	7.63205	32.6302	8.46732	8.34849	34.3072
ENSG00000023909.5	GCLM	protein_coding	chr1	94350761	94374966	-	8	3	5374	4.87448	4.62497	10.3556	5.53073	5.22766	11.2873	8.47194	7.98721	19.1457	8.14471	7.60716	18.4215
ENSG00000024526.12	DEPDC1	protein_coding	chr1	68939835	68962904	-	12	5	5904	0.0975571	0.101686	0.125853	0.0620075	0.064575	0.100577	9.38165	9.41587	11.633	8.65737	8.75275	11.744
ENSG00000024862.12	CCDC28A	protein_coding	chr6	139094657	139114456	+	6	1	1496	27.6438	26.9998	26.9998	28.4021	27.9057	27.9057	12.9968	12.9759	12.9759	13.4139	13.2156	13.2156
ENSG00000025039.10	RRAGD	protein_coding	chr6	90074355	90121989	-	8	3	5072	16.0801	16.1357	19.503	17.9952	18.0778	23.0237	6.41741	6.40314	11.6774	6.50331	6.58965	10.8701
ENSG00000025156.8	HSF2	protein_coding	chr6	122720691	122754264	+	13	3	2702	15.3736	15.411	22.5938	17.1902	17.2935	21.9822	16.953	16.8352	24.4055	16.2887	16.4024	23.2116
ENSG00000025423.7	HSD17B6	protein_coding	chr12	57145945	57181574	+	9	10	2272	7.02733	6.93365	10.9828	6.83805	6.71216	11.6095	1.26079	1.22224	2.20744	1.30139	1.20178	2.04914
ENSG00000025434.14	NR1H3	protein_coding	chr11	47269851	47290396	+	11	34	4346	3.00579	2.86224	12.1608	3.10096	2.94425	11.902	5.3546	5.00214	16.6921	5.68251	5.41589	19.2322
ENSG00000025770.14	NCAPH2	protein_coding	chr22	50946645	50961901	+	20	10	3159	27.8161	25.5117	44.2592	25.6621	23.6321	41.1469	34.538	32.2067	58.4467	35.7436	33.9493	60.2028
ENSG00000025772.7	TOMM34	protein_coding	chr20	43570771	43589127	-	7	1	2062	40.1788	41.2968	41.2968	35.1867	35.9156	35.9156	64.4317	65.4117	65.4117	65.6903	66.7482	66.7482
ENSG00000025796.9	SEC63	protein_coding	chr6	108188960	108279393	-	23	10	8587	11.7785	11.5722	22.3469	14.2076	13.9134	26.8623	22.9733	22.5909	52.8487	20.9561	20.7861	45.0267
ENSG00000026025.9	VIM	protein_coding	chr10	17270258	17279592	+	9	10	4965	66.6858	68.4874	182.768	68.5087	70.4719	187.026	547.923	564.082	1502.93	561.204	578.068	1539.83
ENSG00000026103.15	FAS	protein_coding	chr10	90750414	90775542	+	10	16	3562	3.0141	2.83154	5.55652	2.96127	2.86982	5.92909	4.34832	4.25436	7.81197	3.70135	3.58433	6.86091
ENSG00000026559.9	KCNG1	protein_coding	chr20	49620193	49639666	-	6	7	6320	2.37682	2.38621	6.93938	2.41117	2.48462	7.56656	2.92806	2.89158	9.11875	2.87607	2.87622	9.33184
ENSG00000026652.9	AGPAT4	protein_coding	chr6	161551011	161695093	-	10	8	9419	16.0655	16.0341	34.6884	16.1251	16.0921	31.3895	3.19463	3.20372	8.65186	3.17516	3.15923	9.10527
ENSG00000026751.12	SLAMF7	protein_coding	chr1	160709037	160724611	+	6	10	4604	0.0250207	0.0260796	0.106293	0.0646069	0.067282	0.309099	1.33797	1.33268	2.42019	1.17915	1.1971	2.23233
ENSG00000026950.12	BTN3A1	protein_coding	chr6	26402465	26415444	+	9	11	5547	6.27584	5.92236	10.8734	6.06359	5.90227	10.8931	13.6369	13.0494	25.6133	14.1167	13.6961	26.5462
ENSG00000027697.8	IFNGR1	protein_coding	chr6	137518621	137540586	-	9	6	2680	29.392	29.7399	41.1551	31.5891	31.7946	44.9116	22.2946	22.4305	31.4075	22.2462	22.3104	32.1031
ENSG00000027847.9	B4GALT7	protein_coding	chr5	177027101	177037348	+	6	8	4927	5.61598	5.49298	16.6169	5.32197	5.33438	15.9317	7.31115	7.08542	20.7399	7.99331	7.80984	22.7625
ENSG00000027869.7	SH2D2A	protein_coding	chr1	156776035	156786654	-	9	6	2512	0.403551	0.38239	0.663804	0.564732	0.531201	0.979507	3.69348	3.53748	7.14962	3.63729	3.53263	7.70754
ENSG00000028116.12	VRK2	protein_coding	chr2	58134786	58387055	+	23	9	3557	3.06368	2.92328	5.52973	3.11981	2.80016	5.84459	8.18861	7.74	15.2216	7.1542	6.70963	12.9816
ENSG00000028528.10	SNX1	protein_coding	chr15	64386322	64438289	+	19	14	9796	17.411	17.5301	51.822	17.901	18.0925	54.2723	21.4655	21.293	80.9941	21.6677	21.7281	83.4509
ENSG00000028839.5	TBPL1	protein_coding	chr6	134273308	134311570	+	10	7	5039	8.86998	8.83075	35.8517	9.88518	9.89255	40.3845	6.02176	5.83626	28.1952	6.10342	5.9053	26.7721
ENSG00000029153.10	ARNTL2	protein_coding	chr12	27485787	27576241	+	18	9	5002	2.32602	2.26603	3.13318	2.5479	2.58194	3.27482	9.15267	9.21569	16.0897	8.12056	8.07687	12.2979
ENSG00000029363.11	BCLAF1	protein_coding	chr6	136578001	136610989	-	15	23	9297	24.3599	24.4196	73.6961	28.0072	28.0879	75.7891	36.4664	36.9209	125.467	32.0119	32.2489	110.662
ENSG00000029364.7	SLC39A9	protein_coding	chr14	69864732	69929105	+	10	10	7136	11.6164	11.8152	22.7869	12.739	12.8991	23.1962	20.5398	20.7728	37.6428	20.0685	20.4176	36.347
ENSG00000029639.6	TFB1M	protein_coding	chr6	155578643	155635627	-	11	9	2736	5.17874	5.17848	11.2783	4.44068	4.21522	8.954	12.6378	12.5371	27.11	11.799	11.3473	24.8615
ENSG00000029725.12	RABEP1	protein_coding	chr17	5185558	5289129	+	21	10	6555	30.5958	30.0589	39.614	34.8989	33.7448	44.1669	20.303	19.471	34.2569	18.8894	18.4282	31.6971
ENSG00000029993.10	HMGB3	protein_coding	chrX	150148982	150159248	+	7	5	3967	6.09226	6.03531	13.7529	5.22561	5.16567	10.4947	30.7686	30.1002	79.4864	29.6974	29.0739	78.1535
ENSG00000030110.8	BAK1	protein_coding	chr6	33540329	33548019	-	8	3	2267	7.58146	7.29851	7.78032	8.30652	8.16696	8.7079	22.845	22.3404	23.9554	23.1025	22.5162	24.0009
ENSG00000030582.12	GRN	protein_coding	chr17	42422614	42430470	+	11	21	3520	23.7656	23.8026	44.1429	20.3457	20.3081	41.5536	132.244	135.292	245.011	142.839	146.226	267.558
ENSG00000031691.6	CENPQ	protein_coding	chr6	49431091	49460820	+	9	1	1733	3.78889	3.43653	3.43653	4.92471	4.79863	4.79863	13.6037	12.8495	12.8495	13.3136	12.5607	12.5607
ENSG00000031698.8	SARS	protein_coding	chr1	109756540	109780791	+	11	6	3836	86.3245	86.7789	188.751	84.1626	84.8894	184.797	76.6242	76.4242	170.964	78.1785	78.1657	173.282
ENSG00000031823.10	RANBP3	protein_coding	chr19	5916150	5978153	-	21	31	7445	15.0272	15.1858	50.9748	14.3585	14.4985	47.0404	14.9783	14.9907	55.469	16.4816	16.5513	62.2194
ENSG00000032219.14	ARID4A	protein_coding	chr14	58765103	58840605	+	26	11	7568	7.18145	6.93008	12.5001	7.83957	7.49353	13.4944	5.48664	5.35018	11.1546	5.25513	5.10449	8.63511
ENSG00000033050.3	ABCF2	protein_coding	chr7	150904923	150924316	-	18	6	4448	25.4994	25.6122	35.5007	25.5403	25.7299	34.4241	44.7781	45.3545	70.1805	43.4477	44.0501	66.4962
ENSG00000033178.8	UBA6	protein_coding	chr4	68478370	68566897	-	32	6	11432	4.98388	4.92592	14.3431	6.06445	5.96538	14.0071	8.57706	8.40229	23.2181	8.21283	8.14497	26.0399
ENSG00000033327.8	GAB2	protein_coding	chr11	77926343	78129394	-	15	7	6771	21.6474	22.2195	25.3996	20.593	21.041	23.7618	8.16539	8.34691	9.27724	8.07857	8.27422	9.19645
ENSG00000033800.9	PIAS1	protein_coding	chr15	68346517	68483096	+	22	7	4524	11.326	9.02387	19.4065	11.7792	9.57551	20.6915	13.1904	11.9607	24.2044	12.1768	11.1433	22.8555
ENSG00000034053.10	APBA2	protein_coding	chr15	29129629	29410518	+	23	12	6869	60.0177	58.8589	117.09	58.7325	57.3139	114.489	4.08903	3.96183	8.80792	4.38917	4.14066	9.05535
ENSG00000034152.14	MAP2K3	protein_coding	chr17	21187984	21218552	+	16	13	3783	9.39103	9.43933	17.507	8.84868	8.86864	15.748	20.8534	21.1617	39.1542	22.16	22.4483	40.1372
ENSG00000034239.6	EFCAB1	protein_coding	chr8	49623348	49647870	-	11	9	5805	0.754079	0.765308	2.52838	0.855319	0.882525	2.88562	0	0	0	0	0	0
ENSG00000034533.7	ASTE1	protein_coding	chr3	130732719	130746493	-	10	8	3427	3.19334	3.02717	4.02221	3.18475	2.94115	3.99645	3.8021	3.73513	4.87908	3.79766	3.5706	4.8061
ENSG00000034677.7	RNF19A	protein_coding	chr8	101269288	101348446	-	16	15	6031	14.4935	14.5295	30.4099	16.7271	17.0562	31.0674	15.2956	15.0893	35.1441	15.5356	15.1708	40.4608
ENSG00000034713.3	GABARAPL2	protein_coding	chr16	75600249	75611779	+	5	5	3034	107.01	110.082	333.89	108.522	111.546	336.917	37.3312	38.3715	114.031	36.09	37.2563	110.549
ENSG00000035115.17	SH3YL1	protein_coding	chr2	217730	266398	-	24	29	11165	4.95862	4.58344	36.9641	5.26678	4.79978	40.5112	3.26947	3.00355	21.7057	3.21696	2.96182	21.2259
ENSG00000035141.3	FAM136A	protein_coding	chr2	70523107	70529222	-	2	6	3086	11.5494	11.8748	20.1413	11.8408	12.1612	20.6887	46.962	48.2402	80.7336	43.6808	44.6817	74.1705
ENSG00000035499.8	DEPDC1B	protein_coding	chr5	59892739	59996017	-	14	7	3806	0.460056	0.447977	0.828999	0.529035	0.513376	0.781877	15.4456	15.308	25.8031	15.1362	15.0722	26.0289
ENSG00000035664.7	DAPK2	protein_coding	chr15	64199235	64364232	-	21	12	7041	2.66679	2.52044	7.52738	2.66471	2.55169	7.79861	1.04049	0.931518	2.78354	1.30111	1.22801	4.20532
ENSG00000036054.8	TBC1D23	protein_coding	chr3	99979844	100044095	+	20	9	5168	7.81047	7.82039	11.6138	9.12929	9.02778	13.1616	12.0519	11.9901	20.8025	10.8517	10.8065	16.2054
ENSG00000036448.5	MYOM2	protein_coding	chr8	1993155	2113475	+	46	15	7062	5.34055	5.27073	22.6364	5.49177	5.48635	21.1113	0.333833	0.340791	2.4177	0.27798	0.2506	1.97321
ENSG00000036530.4	CYP46A1	protein_coding	chr14	100150641	100193638	+	18	8	9354	14.7929	14.8413	66.5464	12.9814	12.9509	57.8368	0.509489	0.418445	1.55166	0.544099	0.500017	2.02696
ENSG00000036549.8	ZZZ3	protein_coding	chr1	78028101	78149104	-	17	11	9008	5.64468	5.61698	13.4747	5.898	5.94117	13.9127	11.3044	11.3943	28.0994	10.1511	10.2441	25.8195
ENSG00000036672.11	USP2	protein_coding	chr11	119225925	119252436	-	15	7	4538	14.7688	14.7482	26.0223	15.5194	15.3744	26.6158	2.01659	2.0281	2.86147	2.13625	2.12261	3.43146
ENSG00000037042.8	TUBG2	protein_coding	chr17	40811323	40819024	+	10	3	2772	74.5363	68.0487	110.214	72.5301	65.6306	108.186	20.8413	16.9157	29.0631	21.5166	17.7484	30.1372
ENSG00000037241.3	RPL26L1	protein_coding	chr5	172385732	172396774	+	7	6	1164	14.152	13.74	23.4888	13.4257	13.1833	21.7063	33.0375	32.7405	54.4499	34.3964	34.3391	56.6218
ENSG00000037280.11	FLT4	protein_coding	chr5	180028506	180076624	-	26	11	8849	0.708174	0.711007	1.60641	0.736922	0.735122	1.34541	0.395329	0.379563	0.971401	0.402605	0.377129	1.37042
ENSG00000037474.10	NSUN2	protein_coding	chr5	6599352	6633404	-	19	10	5506	11.2894	10.5852	25.1549	11.2617	10.5206	25.8811	51.9795	50.5929	103.782	50.3905	49.1542	103.39
ENSG00000037637.6	FBXO42	protein_coding	chr1	16573334	16678949	-	11	4	8984	8.04984	7.97619	19.4221	8.09639	8.08153	17.6217	7.40967	7.25934	17.7409	7.33222	7.1816	20.3494
ENSG00000038002.4	AGA	protein_coding	chr4	178351924	178363657	-	9	6	2675	5.05568	5.0093	10.6822	5.23478	5.13085	9.66154	8.67104	8.62118	16.8919	8.63425	8.48717	19.1132
ENSG00000038219.8	BOD1L1	protein_coding	chr4	13570362	13629347	-	28	6	15860	9.70373	9.77371	24.6033	10.1622	10.2569	26.4967	10.263	10.3286	25.5761	9.45743	9.52297	23.6386
ENSG00000038274.12	MAT2B	protein_coding	chr5	162930120	162946342	+	5	8	5153	20.2045	20.3652	53.0703	21.8639	22.1589	53.6269	15.265	15.2584	41.0918	15.3748	15.5528	39.011
ENSG00000038295.3	TLL1	protein_coding	chr4	166794410	167025047	+	25	6	7522	3.09965	3.10313	3.88299	2.63424	2.60076	3.2854	0.0471812	0.0457071	0.0512536	0.0515516	0.050416	0.073091
ENSG00000038382.13	TRIO	protein_coding	chr5	14143811	14532235	+	64	24	17500	18.0271	17.909	63.8124	17.4587	17.4477	62.4698	16.134	15.9754	46.8668	16.3875	16.2671	48.4392
ENSG00000038427.11	VCAN	protein_coding	chr5	82767284	82878122	+	15	12	14831	5.85648	5.88411	16.6849	6.17415	6.14864	13.787	16.9249	17.2187	36.5602	15.5879	15.8858	32.604
ENSG00000038945.10	MSR1	protein_coding	chr8	15965387	16424999	-	27	15	7812	0.911301	0.894535	3.82847	0.943114	0.887609	3.47594	0.321253	0.308073	1.36963	0.245087	0.229777	0.792627
ENSG00000039123.11	SKIV2L2	protein_coding	chr5	54603588	54721409	+	28	10	6578	12.185	12.1531	26.8573	12.8804	12.6277	30.5578	26.3826	26.3142	66.13	23.7715	23.6485	59.7261
ENSG00000039139.9	DNAH5	protein_coding	chr5	13690440	13944652	-	81	4	16475	0.24053	0.241963	0.40785	0.2236	0.218395	0.69073	0.324662	0.324265	1.2969	0.36041	0.357553	1.40544
ENSG00000039319.12	ZFYVE16	protein_coding	chr5	79703832	79775169	+	23	13	11461	8.06901	7.80286	24.242	8.95586	8.79861	26.0773	7.51137	7.47416	19.2158	6.70124	6.70596	17.8201
ENSG00000039523.13	FAM65A	protein_coding	chr16	67552321	67580691	+	24	23	6730	29.9029	29.973	59.7947	28.2185	28.2291	54.4075	16.935	17.1099	32.2228	18.2002	18.3097	33.9201
ENSG00000039560.9	RAI14	protein_coding	chr5	34656342	34832732	+	32	29	7702	2.66227	2.70011	5.39796	2.78063	2.83698	5.57487	16.8055	17.004	31.3128	16.1141	16.4093	30.6183
ENSG00000039650.5	PNKP	protein_coding	chr19	50364461	50371166	-	11	15	3531	10.381	9.71174	24.092	9.73291	8.92123	21.0191	18.4793	17.1519	39.844	20.042	18.2437	43.0957
ENSG00000040275.12	SPDL1	protein_coding	chr5	169010638	169031782	+	18	15	4777	2.91304	2.80508	5.79266	3.24268	3.08265	6.86106	16.7796	16.6642	37.1871	16.0726	15.8879	34.3019
ENSG00000040487.8	PQLC2	protein_coding	chr1	19638820	19655794	+	9	6	2686	10.353	9.23551	16.228	9.16594	8.37446	14.5405	11.5895	10.4173	17.0579	11.4592	10.5232	17.1332
ENSG00000040531.10	CTNS	protein_coding	chr17	3539762	3564836	+	13	12	3398	4.3122	4.15547	5.64325	4.57885	4.47392	6.38562	11.623	11.41	16.6752	11.5187	11.3092	15.3738
ENSG00000040633.8	PHF23	protein_coding	chr17	7138347	7143041	-	11	12	2783	18.4859	18.9662	29.6255	16.8379	17.2354	26.1742	24.7486	25.449	40.5394	24.584	24.9821	40.256
ENSG00000040933.11	INPP4A	protein_coding	chr2	99061317	99210853	+	33	11	13202	15.6537	15.2849	31.3712	16.82	16.383	34.3264	7.96477	7.77259	20.6098	7.82401	7.65045	19.3285
ENSG00000041357.11	PSMA4	protein_coding	chr15	78832747	78841604	+	6	21	3839	22.9611	23.007	71.2875	22.8808	23.2199	74.0802	72.6618	73.6778	234.456	66.7287	67.5941	214.982
ENSG00000041515.11	MYO16	protein_coding	chr13	109248500	109860355	+	39	7	8994	2.15943	2.1547	2.91275	1.75791	1.73267	2.38182	1.02312	0.952722	1.82181	1.21259	1.11596	1.84791
ENSG00000041880.10	PARP3	protein_coding	chr3	51976361	51982883	+	10	9	2928	10.2999	9.93207	13.2052	9.05697	8.98439	13.5885	14.5449	13.9099	20.9669	14.5265	14.0829	23.4236
ENSG00000041982.10	TNC	protein_coding	chr9	117782806	117880536	-	33	16	8687	3.6016	3.60198	5.45181	3.69011	3.67832	5.50011	140.846	144.366	227.453	140.914	144.422	229.034
ENSG00000041988.11	THAP3	protein_coding	chr1	6684926	6695646	+	7	8	4072	8.00031	7.6489	22.6036	8.16448	7.74767	23.5622	6.09465	6.0077	19.1395	5.58873	5.46368	17.2645
ENSG00000042088.9	TDP1	protein_coding	chr14	90421283	90511106	+	25	18	6221	3.84047	3.77139	7.61014	3.71477	3.58514	7.6105	9.41702	9.32718	24.1394	9.04992	9.05858	23.3034
ENSG00000042286.10	AIFM2	protein_coding	chr10	71857979	71892690	-	11	3	5131	3.67745	3.56631	5.7543	3.61651	3.53406	5.76633	7.98881	8.09745	13.4989	8.62491	8.57349	13.9915
ENSG00000042317.12	SPATA7	protein_coding	chr14	88851268	88936694	+	19	22	6872	3.83873	3.71464	13.9677	3.81568	3.62346	12.9167	2.1838	2.11667	7.28165	1.75631	1.73648	6.22613
ENSG00000042445.9	RETSAT	protein_coding	chr2	85569211	85581743	-	11	10	4264	20.4024	20.4604	31.2267	20.3373	20.0617	30.3253	25.7243	25.4049	39.3525	24.1504	23.7937	36.2868
ENSG00000042493.11	CAPG	protein_coding	chr2	85621871	85645555	-	15	15	2607	7.44109	7.50729	21.0436	8.18863	8.10725	22.8744	31.7869	31.7626	81.8641	33.969	34.4269	94.1642
ENSG00000042753.7	AP2S1	protein_coding	chr19	47341393	47354249	-	6	10	1704	64.6014	65.8415	134.815	57.645	58.9412	118.887	73.3269	75.088	152.176	75.7508	77.4927	154.896
ENSG00000042980.8	ADAM28	protein_coding	chr8	24151553	24216531	+	28	14	9351	0.965814	0.752447	4.29667	1.00077	0.769555	4.5278	0.243982	0.217774	0.806937	0.152915	0.121665	0.727333
ENSG00000043039.5	BARX2	protein_coding	chr11	129245835	129322171	+	4	4	4411	0.318609	0.304872	0.742978	0.414977	0.415953	1.0646	1.35628	1.30106	3.17958	1.60985	1.5074	3.72579
ENSG00000043143.16	PHF15	protein_coding	chr5	133860003	133918918	+	17	10	9873	15.3664	15.1362	27.4487	15.2469	15.0359	27.3759	9.4102	9.2576	20.1101	9.61278	9.59499	21.5973
ENSG00000043355.6	ZIC2	protein_coding	chr13	100634026	100639018	+	5	5	3301	59.9254	58.6494	81.6763	63.9705	62.678	82.6376	12.7862	12.5785	14.7043	12.7015	12.4227	15.2089
ENSG00000043462.7	LCP2	protein_coding	chr5	169673241	169725231	-	21	9	7231	1.6122	1.51769	6.91212	1.68339	1.63116	6.8546	5.7108	5.38739	23.5136	5.97262	5.58013	24.9375
ENSG00000043591.4	ADRB1	protein_coding	chr10	115803806	115806667	+	1	1	2862	4.21015	4.19534	4.19534	4.501	4.44593	4.44593	0.345437	0.341906	0.341906	0.406469	0.406348	0.406348
ENSG00000044090.4	CUL7	protein_coding	chr6	43005355	43021683	-	28	3	5628	13.8447	13.1847	13.8825	12.412	11.9607	12.6154	26.7236	25.2674	26.7731	26.8927	25.4616	28.9091
ENSG00000044459.10	CNTLN	protein_coding	chr9	17134980	17503921	+	29	6	11167	0.864456	0.845128	1.76073	1.06751	0.996486	2.13685	2.37902	2.32094	5.52295	2.09217	1.97193	4.50632
ENSG00000044524.6	EPHA3	protein_coding	chr3	89156674	89531284	+	17	3	6674	1.36702	1.3745	1.77285	1.40219	1.39242	1.69542	1.65985	1.63262	2.53931	1.98999	2.01907	2.84846
ENSG00000044574.7	HSPA5	protein_coding	chr9	127997132	128003609	-	8	1	3908	120.554	122.75	122.75	121.242	123.372	123.372	483.131	490.789	490.789	466.928	473.641	473.642
ENSG00000046604.8	DSG2	protein_coding	chr18	29078006	29128971	+	15	2	6190	0.372199	0.380191	0.403599	0.232874	0.242516	0.39984	25.3457	25.7846	27.7027	24.3923	24.9348	26.5526
ENSG00000046647.9	GEMIN8	protein_coding	chrX	14026398	14048012	-	8	5	2424	10.5691	9.14399	19.1992	9.42038	7.94273	16.743	12.6644	10.834	24.3118	11.468	9.86663	21.5432
ENSG00000046651.10	OFD1	protein_coding	chrX	13752832	13787480	+	25	9	5212	7.18314	6.86052	12.8495	7.00208	6.58795	15.1186	16.9015	16.1716	29.4891	15.8843	15.4398	27.2603
ENSG00000046653.10	GPM6B	protein_coding	chrX	13789150	13956757	-	15	11	5675	192.051	194.466	389.847	221.623	224.883	399.529	4.13637	4.13363	10.39	3.92469	3.91146	11.4123
ENSG00000046774.9	MAGEC2	protein_coding	chrX	141290131	141293076	-	3	1	1991	0.0115716	0.0120613	0.0120613	0	0	0	14.0691	14.492	14.492	12.9517	13.1425	13.1425
ENSG00000047056.10	WDR37	protein_coding	chr10	1095478	1178237	+	18	5	5656	15.3689	14.9197	19.8778	15.6678	15.2802	20.1412	7.52067	7.13541	10.1962	6.9202	6.63785	8.97727
ENSG00000047188.11	YTHDC2	protein_coding	chr5	112849380	112930982	+	28	7	10816	6.32851	6.24998	14.039	6.95139	6.81183	15.3008	8.50773	8.46515	19.2342	7.97251	7.82113	15.9121
ENSG00000047249.12	ATP6V1H	protein_coding	chr8	54628117	54756118	-	17	19	5090	47.0604	48.1415	119.021	45.3884	46.4111	113.497	14.7417	14.99	39.967	14.0319	14.2354	37.2947
ENSG00000047457.9	CP	protein_coding	chr3	148880197	148939842	-	22	15	7296	6.5208	6.50382	18.6856	6.35368	6.38161	17.1011	32.8824	33.2398	74.129	30.5404	31.0029	76.3994
ENSG00000047579.15	DTNBP1	protein_coding	chr6	15523032	15663289	-	14	11	3078	14.2591	14.5037	36.3524	14.057	14.0817	34.6251	9.70176	9.62329	22.1656	9.52736	9.51152	20.7623
ENSG00000047617.10	ANO2	protein_coding	chr12	5641035	6055398	-	38	11	6012	0.502016	0.487312	0.788195	0.475731	0.447868	0.948401	0.522849	0.470694	0.983669	0.52809	0.504629	0.98854
ENSG00000047621.7	C12orf4	protein_coding	chr12	4596894	4647674	-	16	9	4939	7.0624	7.01121	9.3329	8.00063	7.99901	10.9329	6.08723	6.08294	9.6292	5.98164	5.94809	9.96281
ENSG00000047634.10	SCML1	protein_coding	chrX	17755588	17773105	+	6	7	5475	3.04242	2.88608	6.31007	3.34331	3.0944	6.37167	7.047	6.67089	13.427	6.62221	6.32164	12.8437
ENSG00000047662.4	FAM184B	protein_coding	chr4	17630929	17783135	-	18	1	6622	1.76394	1.65727	1.65727	1.73109	1.68402	1.68402	0.0842185	0.0878633	0.0878633	0.124436	0.129808	0.129808
ENSG00000048140.13	TSPAN17	protein_coding	chr5	176074388	176086058	+	6	10	5218	11.811	11.961	24.5665	11.3658	11.494	23.1302	10.5227	10.7653	22.3749	11.2029	11.3812	25.5327
ENSG00000048162.15	NOP16	protein_coding	chr5	175810949	175815976	-	5	9	2852	5.3801	4.84998	12.0625	4.78154	4.0939	10.4954	25.6875	23.3404	59.5644	25.9778	23.2608	61.1415
ENSG00000048342.11	CC2D2A	protein_coding	chr4	15471489	15603180	+	41	17	7570	1.84739	1.81771	5.91412	2.17927	2.10897	7.30339	3.94813	3.87095	11.274	3.5153	3.48336	10.3594
ENSG00000048392.7	RRM2B	protein_coding	chr8	103216730	103251346	-	11	10	5548	10.0578	10.2151	13.6806	12.1332	12.4209	14.7527	10.2167	10.2346	14.8604	9.07747	9.20958	14.3112
ENSG00000048405.5	ZNF800	protein_coding	chr7	126986844	127071978	-	8	7	5793	3.20551	3.0883	8.41893	3.45996	3.30296	8.2768	7.15465	6.56492	15.2613	6.64777	6.25829	14.818
ENSG00000048462.6	TNFRSF17	protein_coding	chr16	12058964	12061925	+	4	3	1118	0	0	0	0.0818632	0.0852529	0.14551	5.50983	5.46442	6.40693	5.37608	5.40463	6.07885
ENSG00000048540.10	LMO3	protein_coding	chr12	16701307	16763528	-	17	34	10268	15.9016	16.1326	61.9643	19.1639	19.5327	69.887	0.148129	0.146812	0.576135	0.146339	0.132959	0.697023
ENSG00000048544.5	MRPS10	protein_coding	chr6	42174539	42185603	-	7	1	2110	19.3376	19.4731	19.4731	19.5625	19.4917	19.4917	40.3914	41.0114	41.0114	41.0744	41.3497	41.3497
ENSG00000048828.12	FAM120A	protein_coding	chr9	96214004	96328397	+	19	7	7296	16.5657	16.434	31.6283	17.7878	17.5609	32.0059	39.4666	39.5072	80.0018	40.26	40.3208	85.3254
ENSG00000049089.9	COL9A2	protein_coding	chr1	40766159	40783488	-	36	11	4151	31.2424	29.6315	46.8646	30.719	29.3447	47.1714	7.79241	7.36511	11.9074	8.40747	7.82637	12.8871
ENSG00000049130.9	KITLG	protein_coding	chr12	88886570	88974628	-	12	5	6030	5.2306	5.37629	8.11414	6.64795	6.7612	9.73141	3.36736	3.46485	5.80468	3.20329	3.24514	5.22482
ENSG00000049239.8	H6PD	protein_coding	chr1	9294834	9331396	+	6	3	9321	6.19913	6.21415	6.35104	5.9086	5.93084	6.04432	13.3534	13.4916	14.0848	13.0162	13.0383	13.3365
ENSG00000049246.10	PER3	protein_coding	chr1	7844380	7905237	+	23	7	8059	18.8195	18.3108	29.1995	20.5101	20.2328	28.8824	7.65935	7.61016	10.8738	6.97991	6.89536	9.80917
ENSG00000049247.9	UTS2	protein_coding	chr1	7903143	7913572	-	7	3	1783	0	0	0	0.192491	0.120277	0.235486	19.5917	19.6089	55.5807	18.5268	18.6318	53.0808
ENSG00000049540.12	ELN	protein_coding	chr7	73442119	73484237	+	34	33	6542	9.24804	8.67034	23.9984	8.79276	8.12241	21.7725	1.91809	1.93237	4.44749	2.23019	2.26077	4.60873
ENSG00000049541.6	RFC2	protein_coding	chr7	73645829	73668774	-	13	12	2197	12.0386	12.1109	17.9333	12.7578	12.7221	18.2252	48.2419	48.211	68.6349	51.7918	52.405	76.2703
ENSG00000049656.9	CLPTM1L	protein_coding	chr5	1317859	1345214	-	17	16	6557	13.3765	13.1332	64.0689	12.9496	12.759	61.612	48.3064	47.372	221.472	49.8833	48.8905	231.055
ENSG00000049860.9	HEXB	protein_coding	chr5	73935848	74018472	+	16	13	5067	10.5624	10.3649	39.2584	11.6323	11.2628	39.0185	48.7234	49.4176	159.965	46.2042	46.7968	154.856
ENSG00000049883.10	PTCD2	protein_coding	chr5	71616194	71656052	+	12	12	3637	3.00896	2.92501	6.38332	3.75579	3.66235	7.50585	5.88962	5.77366	10.8548	6.13722	5.94337	10.5321
ENSG00000050030.9	KIAA2022	protein_coding	chrX	73952684	74145282	-	4	2	11719	2.772	2.81555	2.81555	2.75491	2.78155	2.78155	0.341775	0.343026	0.646332	0.322619	0.312815	0.312815
ENSG00000050130.13	JKAMP	protein_coding	chr14	59951161	59972128	+	8	14	4350	14.9516	14.8004	40.5398	14.7121	14.6694	38.2614	11.9989	11.8008	34.2776	12.3017	12.2458	35.254
ENSG00000050165.13	DKK3	protein_coding	chr11	11984653	12031316	-	12	17	5059	241.608	247.674	575.25	229.581	234.914	546.018	29.0478	29.1548	65.7713	29.812	29.7346	63.0181
ENSG00000050327.10	ARHGEF5	protein_coding	chr7	144052381	144077725	+	15	4	5818	0.158399	0.160975	0.221563	0.212369	0.217067	0.481135	1.63828	1.66827	2.15993	1.37883	1.3862	1.96426
ENSG00000050344.8	NFE2L3	protein_coding	chr7	26191860	26226745	+	4	3	4249	0.683202	0.700812	1.21675	0.662352	0.65613	0.86297	18.2323	18.6665	28.8061	17.7789	18.2727	26.7577
ENSG00000050393.7	MCUR1	protein_coding	chr6	13786789	13814800	-	10	4	6057	12.7539	12.7544	18.2315	12.5907	12.7973	18.7297	15.3806	15.1555	29.3786	13.7604	13.6824	24.8087
ENSG00000050426.11	LETMD1	protein_coding	chr12	51441745	51454207	+	8	38	4400	25.7619	25.8534	69.4068	25.0544	24.9384	63.3875	32.7819	31.586	91.0295	32.3271	31.3266	90.1981
ENSG00000050438.12	SLC4A8	protein_coding	chr12	51785101	51902980	+	38	18	11415	5.50193	5.32455	17.4112	5.92515	5.81353	19.6256	0.95936	0.945275	3.34528	1.0552	1.00552	3.61805
ENSG00000050555.13	LAMC3	protein_coding	chr9	133884469	133969860	+	29	4	7594	1.29849	1.28387	2.54029	1.23232	1.18921	2.42926	2.24322	2.17662	3.9596	2.09677	2.05744	3.34244
ENSG00000050748.13	MAPK9	protein_coding	chr5	179660143	179719099	-	17	13	8955	38.4782	39.1627	87.4012	40.6565	41.3474	92.2465	9.69547	9.75772	34.9912	8.8553	8.8395	33.3465
ENSG00000050820.12	BCAR1	protein_coding	chr16	75262928	75301951	-	20	22	8335	21.3392	21.352	60.9588	19.4466	19.3227	54.5004	13.2634	13.4789	36.5738	13.8727	14.0893	38.1046
ENSG00000051009.6	FAM160A2	protein_coding	chr11	6232565	6255941	-	12	5	4736	13.8303	13.6601	29.5761	12.0829	11.9292	26.1869	12.6909	12.369	23.3078	13.2181	13.0787	26.5641
ENSG00000051180.12	RAD51	protein_coding	chr15	40986972	41024354	+	13	11	2863	0.225321	0.218081	0.534945	0.239757	0.241361	0.442395	16.2299	16.2672	33.9687	17.1927	17.1755	35.7059
ENSG00000051341.9	POLQ	protein_coding	chr3	121150278	121264853	-	31	3	9099	0.0481089	0.0369489	0.0747512	0.0754394	0.0419003	0.0434474	6.88419	6.64732	8.90324	6.00099	5.82382	6.99022
ENSG00000051382.4	PIK3CB	protein_coding	chr3	138372860	138553780	-	25	14	6531	19.1093	19.5687	35.3925	19.9835	20.2636	37.135	14.0509	14.3755	26.3745	12.9509	13.2119	25.4797
ENSG00000051523.6	CYBA	protein_coding	chr16	88709691	88717560	-	6	10	3357	5.69629	5.7156	23.5567	4.72338	4.70601	18.9131	57.3673	57.1952	231.914	66.1013	66.1457	270.138
ENSG00000051620.6	HEBP2	protein_coding	chr6	138724668	138743334	+	6	4	10356	4.47167	4.4754	15.3307	5.00655	5.10111	17.6706	6.50634	6.50446	28.4593	6.08233	6.11541	27.8419
ENSG00000051825.10	MPHOSPH9	protein_coding	chr12	123636867	123728561	-	27	26	10304	2.92013	2.56595	10.6809	3.1088	2.72646	12.7812	7.34858	6.93255	31.094	7.37608	6.99522	29.6877
ENSG00000052344.11	PRSS8	protein_coding	chr16	31142756	31147083	-	6	6	3008	0.551468	0.550856	0.905331	0.631351	0.649571	1.06215	13.8969	14.1554	24.3768	14.6961	14.9607	25.248
ENSG00000052723.7	SIKE1	protein_coding	chr1	115312100	115323306	-	5	10	5894	6.69987	6.49856	10.8021	7.46517	7.58831	12.6843	16.821	16.7951	42.2008	15.9502	15.9996	36.7637
ENSG00000052795.8	FNIP2	protein_coding	chr4	159690290	159829201	+	20	7	10868	6.87908	6.90726	12.0372	8.18975	8.21752	13.786	4.4691	4.50434	8.82613	4.07645	4.09889	7.504
ENSG00000052802.8	MSMO1	protein_coding	chr4	166248775	166264312	+	6	5	2892	34.9331	35.5479	51.8516	43.2456	44.064	62.1399	31.9239	32.4916	45.975	30.1438	30.6233	43.9124
ENSG00000052850.5	ALX4	protein_coding	chr11	44281994	44331716	-	4	1	5750	0.240408	0.246406	0.246406	0.187025	0.194769	0.194769	0.833236	0.846299	0.846299	0.931494	0.962912	0.962912
ENSG00000053372.4	MRTO4	protein_coding	chr1	19578033	19586622	+	8	3	2822	17.1528	16.7044	23.0398	16.5484	16.1782	20.7322	45.5703	45.2089	58.5293	48.5401	47.9479	61.4637
ENSG00000053438.7	NNAT	protein_coding	chr20	36149617	36152092	+	3	2	1294	90.1089	92.1964	98.4474	82.1869	84.7245	90.0388	0.391805	0.408761	0.418633	0.224752	0.234454	0.250937
ENSG00000053501.8	USE1	protein_coding	chr19	17326155	17330638	+	6	11	2431	14.7181	14.1062	41.1582	13.0734	13.0168	38.0621	9.63521	9.13836	26.6551	11.1159	10.6702	30.5848
ENSG00000053702.10	NRIP2	protein_coding	chr12	2934514	2944710	-	7	3	2803	29.8284	29.6343	31.1569	28.4479	28.1127	30.0541	0.0361752	0.0283056	0.0288931	0.025939	0.0180392	0.0184136
ENSG00000053747.11	LAMA3	protein_coding	chr18	21269407	21535030	+	80	14	13522	0.863838	0.824031	1.85634	0.925587	0.902235	2.70248	1.38916	1.36322	3.03348	1.46253	1.46397	3.398
ENSG00000053770.7	AP5M1	protein_coding	chr14	57735627	57756797	+	11	9	4371	10.858	10.8561	17.0437	12.0921	12.1567	18.9283	9.44744	9.34201	17.8978	9.52572	9.5147	16.6801
ENSG00000053900.6	ANAPC4	protein_coding	chr4	25378835	25420120	+	23	11	7494	5.38624	5.14954	15.2147	5.02253	4.85848	14.1601	7.67529	7.45693	22.5847	6.88522	6.66965	19.7984
ENSG00000054116.7	TRAPPC3	protein_coding	chr1	36602173	36615098	-	5	7	3313	23.1434	22.9558	62.1403	22.8739	22.8213	64.9067	28.0584	28.3308	77.1235	29.2028	29.0899	78.5427
ENSG00000054118.9	THRAP3	protein_coding	chr1	36690017	36770958	+	15	4	4736	38.0904	36.7463	43.8333	39.9109	38.6504	45.3354	71.4354	70.3891	89.038	70.348	69.4506	83.2666
ENSG00000054179.7	ENTPD2	protein_coding	chr9	139942550	139948497	-	9	4	2633	5.65258	5.18953	7.30447	4.79688	4.35296	6.11382	4.64056	4.45971	6.23355	4.82321	4.35928	6.01041
ENSG00000054392.8	HHAT	protein_coding	chr1	210501596	210849638	+	16	11	4296	1.85557	1.7664	2.48339	1.71499	1.58078	2.00795	1.92366	1.87147	2.78447	1.7827	1.78904	2.30717
ENSG00000054598.5	FOXC1	protein_coding	chr6	1610681	1614127	+	1	1	3447	3.9635	3.92224	3.92224	4.40755	4.43797	4.43797	7.1703	7.26579	7.26579	7.53015	7.58384	7.58384
ENSG00000054654.11	SYNE2	protein_coding	chr14	64319683	64693165	+	131	30	31405	3.15967	3.12516	27.6401	2.97111	2.91659	26.525	6.18468	6.20897	25.9153	5.99159	6.07394	26.0718
ENSG00000054690.9	PLEKHH1	protein_coding	chr14	68000018	68056329	+	29	17	10817	38.6555	37.0346	124.813	37.5311	36.239	109.791	4.95887	4.78229	13.7429	5.06133	4.91989	13.4365
ENSG00000054793.9	ATP9A	protein_coding	chr20	50213053	50385173	-	29	4	8317	85.3613	85.7313	92.5347	86.6069	87.1016	94.3204	17.6811	17.7213	18.5173	17.0207	17.0593	17.8402
ENSG00000054803.3	CBLN4	protein_coding	chr20	54572496	54580528	-	3	1	3024	9.82057	9.91059	9.91059	10.9561	10.9685	10.9685	0.0502972	0.0524739	0.0524739	0.00801445	0.00836043	0.00836043
ENSG00000054965.6	FAM168A	protein_coding	chr11	73111532	73309234	-	9	4	7823	66.9703	68.8714	75.3439	67.6157	69.4011	75.5675	20.1651	20.6693	24.6992	18.5416	18.8863	22.4267
ENSG00000054967.8	RELT	protein_coding	chr11	73087309	73108519	+	10	7	6322	5.0619	5.13937	10.2301	5.31303	5.32572	10.7412	7.13338	6.9903	14.5762	8.43381	8.34999	17.7857
ENSG00000055070.12	SZRD1	protein_coding	chr1	16679070	16724640	+	10	11	4747	18.3701	18.6872	27.378	17.6125	18.0707	28.227	56.6164	57.9524	88.9257	58.0187	59.4101	97.3619
ENSG00000055118.10	KCNH2	protein_coding	chr7	150642049	150675403	-	15	7	7017	15.3364	15.3352	30.4705	13.9235	13.9668	27.7858	7.52509	7.70754	18.8024	8.38596	8.48135	20.431
ENSG00000055130.11	CUL1	protein_coding	chr7	148395006	148498128	+	24	3	3548	40.3639	39.9874	46.3237	40.5057	40.2621	46.6682	49.8993	49.0847	56.8525	47.6449	47.2504	54.7316
ENSG00000055147.13	FAM114A2	protein_coding	chr5	153369688	153418496	-	17	17	6543	2.62328	2.5251	7.70578	2.48985	2.31617	6.49862	4.98627	5.00401	18.3163	4.7338	4.69472	16.63
ENSG00000055163.14	CYFIP2	protein_coding	chr5	156693089	156822606	+	39	31	10509	76.0319	76.6628	182.958	74.9259	75.6021	175.626	15.0714	14.9184	37.8245	15.1563	15.0359	37.4225
ENSG00000055211.8	GINM1	protein_coding	chr6	149887430	149912884	+	9	2	2248	20.2412	19.0147	21.653	20.9164	19.6519	22.5619	23.1508	22.7998	25.8121	20.9691	20.5359	23.1264
ENSG00000055332.12	EIF2AK2	protein_coding	chr2	37326353	37384208	-	17	7	10753	7.60828	7.72034	8.90606	9.36254	9.4998	10.6991	9.9532	9.99043	17.6489	9.15516	9.29175	15.2303
ENSG00000055483.15	USP36	protein_coding	chr17	76783463	76837523	-	26	24	10409	9.61272	9.43123	29.8085	9.5027	9.39255	26.2956	15.6034	15.6079	44.6015	16.2122	16.1154	46.7218
ENSG00000055609.13	KMT2C	protein_coding	chr7	151832010	152133090	-	61	14	22650	8.37138	8.4394	21.1483	8.47144	8.47084	20.7822	8.37494	8.37659	21.7275	7.96622	7.96185	17.4068
ENSG00000055732.8	MCOLN3	protein_coding	chr1	85483765	85514182	-	14	6	6623	0.0869662	0.0870208	0.217101	0.0621854	0.0647603	0.152534	1.17505	1.13806	2.72668	1.13805	1.08411	2.58788
ENSG00000055917.11	PUM2	protein_coding	chr2	20448452	20551995	-	27	12	6858	30.0939	30.2715	39.834	31.8556	32.1114	40.6426	31.2862	31.5642	47.3013	30.307	30.5167	46.5448
ENSG00000055957.6	ITIH1	protein_coding	chr3	52811603	52826078	+	23	13	4543	0.0760701	0.0792894	0.30805	0.0654744	0.0681854	0.329776	1.02671	1.00129	2.87314	0.853558	0.801364	2.43545
ENSG00000056050.6	C4orf27	protein_coding	chr4	170650616	170679104	-	8	3	1436	23.8252	23.9472	28.1761	27.8521	27.7442	33.2966	21.8015	21.7505	25.5236	20.2358	20.0882	24.1192
ENSG00000056277.11	ZNF280C	protein_coding	chrX	129336685	129402873	-	19	2	4634	0.974463	0.969063	1.10284	1.21465	1.21352	1.21352	3.13453	3.11609	3.45752	3.38902	3.34983	3.75191
ENSG00000056558.6	TRAF1	protein_coding	chr9	123664671	123691451	-	10	3	6449	5.16942	5.28392	6.48563	5.13744	5.15064	6.32888	4.23348	4.25676	4.66585	4.08125	4.06534	4.47452
ENSG00000056661.9	PCGF2	protein_coding	chr17	36890150	36906070	-	13	7	3511	18.6032	18.2141	25.9503	18.3255	18.073	25.5234	24.6927	24.059	36.7253	24.6982	24.2522	39.123
ENSG00000056736.5	IL17RB	protein_coding	chr3	53880607	53899827	+	10	3	3038	15.1294	14.829	20.5977	13.3308	13.169	17.7877	10.7807	10.4551	13.1562	9.76448	9.22066	11.653
ENSG00000056972.14	TRAF3IP2	protein_coding	chr6	111877657	111927481	-	11	12	6553	2.14464	2.11447	8.78516	2.53843	2.51627	11.2794	6.85484	6.83268	21.26	6.2984	6.26165	21.7077
ENSG00000056998.14	GYG2	protein_coding	chrX	2746829	2800859	+	13	10	3646	6.90035	6.95527	9.01649	6.28813	6.30015	8.70102	12.8348	12.6721	15.5532	13.0019	13.0154	16.2371
ENSG00000057149.10	SERPINB3	protein_coding	chr18	61322431	61329197	-	8	2	1777	0	0	0	0	0	0	1.84025	1.86036	1.86036	1.33658	1.38005	1.38005
ENSG00000057252.8	SOAT1	protein_coding	chr1	179262925	179327815	+	17	5	7033	3.01706	2.98427	5.76539	3.07116	3.07974	5.11934	16.0828	16.196	46.0048	15.4553	15.5365	43.3632
ENSG00000057294.9	PKP2	protein_coding	chr12	32943679	33049774	-	15	7	6069	1.52227	1.47195	3.09816	1.58721	1.51944	3.23102	6.80839	6.80236	11.0249	6.75277	6.67769	11.5317
ENSG00000057593.9	F7	protein_coding	chr13	113760105	113774995	+	10	6	3792	0.63795	0.633284	0.950716	0.905094	0.867165	1.13392	2.05231	2.04349	3.06753	2.48621	2.40685	3.9853
ENSG00000057608.12	GDI2	protein_coding	chr10	5807186	5884095	-	14	10	4033	56.3438	57.4838	100.833	58.7025	59.5261	104.573	110.211	112.483	201.395	101.113	103.102	184.477
ENSG00000057704.6	TMCC3	protein_coding	chr12	94960900	95044338	-	8	4	6515	8.6569	8.59569	11.0646	9.18743	9.20942	11.8768	0.937727	0.909301	1.22277	0.944876	0.931337	1.36909
ENSG00000057757.5	PITHD1	protein_coding	chr1	24104895	24114722	+	6	3	2186	105.341	107.536	154.605	106.418	108.055	155.989	38.0131	37.6741	54.1453	38.2937	38.4086	54.1038
ENSG00000058056.4	USP13	protein_coding	chr3	179370543	179507189	+	22	5	8440	4.22838	4.21385	4.27309	4.43789	4.4579	4.58157	10.5934	10.5255	15.2127	10.6132	10.5831	15.0931
ENSG00000058063.11	ATP11B	protein_coding	chr3	182511288	182639423	+	34	10	9196	6.29341	6.25944	13.2828	6.42184	6.29648	12.8194	11.1395	11.1873	20.5572	9.93569	9.87799	19.8333
ENSG00000058085.10	LAMC2	protein_coding	chr1	183155373	183214035	+	22	4	6543	2.01764	1.99659	2.57019	2.03175	1.95199	2.4927	0.906594	0.881158	1.1297	0.818599	0.795977	1.03036
ENSG00000058262.5	SEC61A1	protein_coding	chr3	127770484	127790526	+	13	7	4697	33.8499	34.4081	45.656	33.7926	34.2888	45.0606	140.576	143.388	189.457	143.144	145.281	192.228
ENSG00000058335.11	RASGRF1	protein_coding	chr15	79252289	79383115	-	31	8	8683	47.7684	47.901	77.7629	46.3044	46.5257	73.124	0.557619	0.523881	1.26068	0.681045	0.66677	1.27173
ENSG00000058404.15	CAMK2B	protein_coding	chr7	44256749	44374176	-	33	27	8159	104.027	104.124	287.013	101.938	101.425	277.823	0.534399	0.521871	1.08623	0.546558	0.480292	1.36186
ENSG00000058600.11	POLR3E	protein_coding	chr16	22308730	22346424	+	21	18	9454	6.27763	6.06068	25.2037	6.0917	5.8222	21.5009	13.8574	13.7717	58.9987	14.4584	14.2428	63.1926
ENSG00000058799.9	YIPF1	protein_coding	chr1	54317392	54356407	-	15	9	2259	16.9402	17.3063	24.9085	16.1553	16.0542	22.9902	14.9248	14.9034	22.9777	15.8138	15.6683	24.2594
ENSG00000059122.12	FLYWCH1	protein_coding	chr16	2961938	3001209	+	18	15	8413	22.2285	22.5241	59.5131	22.0676	22.2194	55.2759	11.0011	11.0591	30.8616	12.0156	12.0414	36.3171
ENSG00000059377.11	TBXAS1	protein_coding	chr7	139476850	139720125	+	26	24	6271	1.36302	1.31731	4.79474	1.48501	1.4591	5.08336	1.45526	1.32424	5.94378	1.67343	1.51184	6.40728
ENSG00000059378.8	PARP12	protein_coding	chr7	139723544	139763521	-	15	12	6285	1.40397	1.26853	4.0032	1.32151	1.22079	4.08845	8.26439	7.91933	25.0802	8.81123	8.38306	25.1317
ENSG00000059573.4	ALDH18A1	protein_coding	chr10	97365696	97416463	-	19	5	3756	12.9365	12.8126	16.6273	13.5664	13.5508	18.0246	58.4273	57.8719	72.3165	58.7697	59.0585	71.8555
ENSG00000059588.5	TARBP1	protein_coding	chr1	234527059	234614849	-	33	9	7743	14.0889	12.815	41.8653	13.6434	12.2234	39.6171	20.6648	19.6942	51.9737	19.885	19.0455	48.0119
ENSG00000059691.7	PET112	protein_coding	chr4	152591656	152682175	-	15	14	11757	6.54117	6.68318	55.9696	6.53514	6.58888	51.3163	3.36358	3.34494	20.5615	3.47962	3.4449	21.4654
ENSG00000059804.11	SLC2A3	protein_coding	chr12	8071826	8088871	-	9	11	6159	26.8172	27.262	45.0194	25.7488	26.2114	43.9217	74.6581	75.8882	129.671	73.4548	74.9222	127.051
ENSG00000059915.12	PSD	protein_coding	chr10	104162376	104181296	-	21	8	6327	67.7627	67.9128	158.668	63.583	63.9711	145.789	1.13387	1.0659	2.53773	1.28706	1.11885	3.01399
ENSG00000060069.12	CTDP1	protein_coding	chr18	77439801	77514510	+	18	7	5296	5.77717	5.77228	9.44127	5.37456	5.31815	8.64827	7.99839	8.09486	12.3957	8.85043	8.97948	14.0077
ENSG00000060138.8	YBX3	protein_coding	chr12	10851683	10875911	-	13	18	8615	7.33828	7.20842	47.3392	7.51095	7.46238	50.4588	42.2722	42.5268	276.03	45.3122	45.0321	275.236
ENSG00000060140.4	STYK1	protein_coding	chr12	10771538	10826917	-	14	6	3424	3.59986	3.49972	4.44346	3.86247	3.61877	4.48314	0.629302	0.633365	0.808146	0.7786	0.760525	1.12057
ENSG00000060491.12	OGFR	protein_coding	chr20	61436187	61445352	+	6	3	4702	21.1527	20.9038	38.4274	20.4428	20.3112	35.9426	28.1317	28.2917	50.9608	31.6786	31.7987	58.4413
ENSG00000060558.3	GNA15	protein_coding	chr19	3136191	3163767	+	8	3	2613	3.712	3.59339	4.68093	3.01224	2.94547	3.90963	9.06111	8.70428	10.6631	9.72025	9.46258	11.592
ENSG00000060566.9	CREB3L3	protein_coding	chr19	4153598	4173051	+	10	6	2678	0.507583	0.529064	0.541189	0.452831	0.462683	0.48493	1.3063	1.2542	1.41474	1.46609	1.52938	1.60548
ENSG00000060642.6	PIGV	protein_coding	chr1	27113963	27124889	+	7	7	3382	5.70187	5.34673	7.7733	5.45972	5.12214	7.98926	10.0365	9.89216	15.0539	10.6345	10.5553	16.7522
ENSG00000060656.15	PTPRU	protein_coding	chr1	29563028	29653325	+	34	13	6700	11.4748	11.5626	19.9668	10.2144	10.3279	18.2632	13.3786	13.5076	20.7769	14.2737	14.422	19.9709
ENSG00000060749.10	QSER1	protein_coding	chr11	32914724	33014862	+	16	6	10537	4.10405	4.13871	5.31227	4.55574	4.59739	5.56532	12.7723	12.9913	17.6188	12.1236	12.2223	17.3811
ENSG00000060762.14	MPC1	protein_coding	chr6	166778407	166796486	-	8	5	1525	64.8267	60.2951	118.312	63.6011	58.8595	111.195	28.7741	25.0248	48.5808	28.1611	25.5638	49.7633
ENSG00000060982.10	BCAT1	protein_coding	chr12	24964295	25102393	-	16	9	10372	4.06494	4.09342	5.95128	4.94147	5.00134	6.68167	19.3863	19.7765	31.2294	17.7702	18.0474	33.1454
ENSG00000061273.13	HDAC7	protein_coding	chr12	48176505	48226915	-	27	30	9936	7.57304	7.36907	21.4494	6.62981	6.43668	17.7432	16.7595	16.7236	45.1375	18.4744	18.3533	51.9962
ENSG00000061337.11	LZTS1	protein_coding	chr8	20103676	20161474	-	4	3	5706	13.0216	13.2149	13.6421	12.3466	12.6992	13.0704	7.74354	7.95352	8.21357	8.23148	8.46719	8.70592
ENSG00000061455.10	PRDM6	protein_coding	chr5	122424816	122529960	+	9	4	9350	0.248872	0.256835	0.365544	0.337706	0.351689	0.414389	0.140983	0.138598	0.13984	0.150339	0.140605	0.506819
ENSG00000061656.5	SPAG4	protein_coding	chr20	34203814	34208971	+	10	7	2240	1.86164	1.31863	2.8589	2.10421	1.69138	3.60303	13.9537	11.2163	28.3065	13.4919	11.2527	29.2061
ENSG00000061918.8	GUCY1B3	protein_coding	chr4	156680144	156728743	+	17	7	3724	54.3621	54.3929	68.528	55.9301	55.9809	70.0392	1.17763	1.17179	1.80255	0.989212	0.997971	1.35628
ENSG00000061936.5	SFSWAP	protein_coding	chr12	132195626	132284282	+	18	11	10157	10.6224	10.4998	34.1762	9.90742	9.84141	32.0141	11.568	11.5895	38.0503	11.3984	11.4449	37.127
ENSG00000061938.12	TNK2	protein_coding	chr3	195590235	195638816	-	25	24	11297	36.1402	36.3879	128.266	34.5085	34.6233	115.131	8.83663	8.54484	32.2831	9.92641	9.67682	36.7453
ENSG00000061987.10	MON2	protein_coding	chr12	62860597	62991363	+	38	15	13121	7.19917	7.14146	15.8278	8.34596	8.3138	19.4971	6.86826	6.83293	17.7688	6.66801	6.6938	16.9325
ENSG00000062096.10	ARSF	protein_coding	chrX	2959512	3030767	+	13	3	2215	1.07134	0.964901	1.08927	1.2086	1.09728	1.21308	0	0	0	0	0	0
ENSG00000062194.11	GPBP1	protein_coding	chr5	56469775	56560506	+	15	11	6493	28.8902	29.2511	75.2861	32.8816	33.1165	79.7456	24.4479	24.394	66.6224	22.4889	22.4395	60.5077
ENSG00000062524.11	LTK	protein_coding	chr15	41795836	41806085	-	18	6	3490	1.38631	1.23167	1.34044	1.93405	1.8093	2.54075	1.59072	1.45496	1.70619	1.60414	1.48504	1.85733
ENSG00000062650.13	WAPAL	protein_coding	chr10	88195013	88281572	-	19	6	7280	8.40864	8.45112	13.6413	9.66147	9.78985	14.648	18.013	18.1858	29.0428	16.9384	17.0896	27.5842
ENSG00000062725.5	APPBP2	protein_coding	chr17	58520520	58603580	-	15	6	9866	11.7204	11.7637	18.8258	13.0638	13.1096	20.1731	15.8892	15.7646	37.3521	15.6675	15.6135	36.0735
ENSG00000063015.15	SEZ6	protein_coding	chr17	27281919	27333458	-	18	10	5103	31.396	31.2094	66.8437	30.5167	30.4588	65.1152	0.0894172	0.0621913	0.404193	0.0902368	0.0792692	0.201977
ENSG00000063176.11	SPHK2	protein_coding	chr19	49122548	49133974	+	9	14	6008	13.6593	13.9496	36.1253	13.1313	13.2824	35.5036	4.98304	4.95218	13.2165	5.38123	5.29372	12.8309
ENSG00000063180.4	CA11	protein_coding	chr19	49141199	49149569	-	10	4	2075	285.163	280.983	344.044	261.017	257.023	309.132	9.46799	9.03654	13.2663	8.28102	7.48101	10.4617
ENSG00000063241.3	ISOC2	protein_coding	chr19	55964352	55973710	-	6	8	4408	9.84179	9.19052	38.5726	9.0786	8.35175	34.0775	11.9273	11.5255	47.2543	13.0635	12.5779	51.352
ENSG00000063322.9	MED29	protein_coding	chr19	39881943	39891277	+	5	6	3835	44.9788	45.7552	48.6202	42.1997	42.8597	45.4708	24.431	24.9159	26.5944	23.4015	24.0162	26.3199
ENSG00000063601.12	MTMR1	protein_coding	chrX	149861435	149933576	+	21	18	6332	11.0902	10.6266	18.4462	11.9138	11.2555	20.4704	11.0615	10.7801	18.3771	11.1074	10.8363	19.0831
ENSG00000063761.11	ADCK1	protein_coding	chr14	78266426	78401355	+	15	8	5317	4.39376	4.25904	10.9359	3.73098	3.66587	8.68924	3.19435	3.13363	8.26277	3.3548	3.23335	8.27585
ENSG00000063854.8	HAGH	protein_coding	chr16	1845621	1877195	-	12	12	5052	33.4094	33.0456	159.05	31.0874	30.9266	148.244	12.2835	12.0927	62.8864	13.4803	13.3115	62.2964
ENSG00000064012.17	CASP8	protein_coding	chr2	202098166	202152434	+	16	21	6808	0.267346	0.271605	0.920647	0.221817	0.206502	1.03112	7.70398	7.61007	25.8077	7.51848	7.38256	24.5688
ENSG00000064102.10	ASUN	protein_coding	chr12	27058114	27091259	-	18	10	3345	6.99094	6.87041	10.6479	7.12074	6.97393	10.2509	34.5803	34.456	52.9821	32.1694	31.8802	45.237
ENSG00000064195.7	DLX3	protein_coding	chr17	48067369	48072588	-	3	2	2715	0.00848585	0.00884498	0.0092291	0.00842754	0.00877649	0.028571	2.63301	2.71774	2.83577	2.47267	2.55147	2.66228
ENSG00000064199.2	SPA17	protein_coding	chr11	124543694	124567414	+	5	4	5205	1.88562	1.84547	8.49784	1.65726	1.61601	7.60279	2.99522	2.94193	15.1098	2.40262	2.42376	11.7293
ENSG00000064205.6	WISP2	protein_coding	chr20	43343485	43357150	+	4	6	4981	0.397784	0.371228	1.14952	0.257242	0.267894	0.85375	18.0823	18.3445	60.0187	18.9711	19.0845	63.4904
ENSG00000064270.8	ATP2C2	protein_coding	chr16	84402133	84497793	+	28	14	6693	0.808933	0.692473	2.29292	0.806793	0.825958	1.87565	1.21958	1.14196	2.93935	1.05373	0.959452	2.42246
ENSG00000064300.4	NGFR	protein_coding	chr17	47572655	47592379	+	8	3	4150	9.74859	9.99334	12.2792	10.1558	10.3868	12.8914	3.14581	3.25647	3.95503	3.35212	3.42981	4.30267
ENSG00000064309.10	CDON	protein_coding	chr11	125825691	125933230	-	23	9	10600	5.84454	5.86307	9.87675	6.126	6.24478	10.3937	4.4673	4.58329	10.247	4.28012	4.35755	9.88231
ENSG00000064313.7	TAF2	protein_coding	chr8	120743015	120845103	-	29	9	6547	5.65508	5.69267	10.6399	5.86086	5.82329	9.7522	14.6941	14.5141	29.5178	13.1895	13.0252	24.8956
ENSG00000064393.11	HIPK2	protein_coding	chr7	139246316	139477577	-	16	3	15220	39.778	40.5195	41.9723	42.0964	42.67	44.1679	11.972	12.0922	12.5748	11.4921	11.6742	12.2731
ENSG00000064419.9	TNPO3	protein_coding	chr7	128594948	128695198	-	24	5	3933	20.983	19.5019	22.1708	21.3391	19.7326	22.3517	47.2255	44.495	50.9306	46.8138	44.2835	50.5982
ENSG00000064490.9	RFXANK	protein_coding	chr19	19303008	19312678	+	10	16	2533	11.6969	11.3008	36.2739	10.099	10.1032	34.4315	26.2705	26.2694	84.0544	28.2925	28.2762	88.3018
ENSG00000064545.10	TMEM161A	protein_coding	chr19	19229978	19249322	-	10	15	3281	7.38712	7.37038	13.9585	6.96675	6.79768	12.9874	17.8167	17.8139	34.7156	20.1804	20.1654	38.323
ENSG00000064547.9	LPAR2	protein_coding	chr19	19734477	19739739	-	4	9	2980	1.60037	1.63586	3.29138	1.44349	1.47927	3.62723	9.09359	9.21203	19.0898	9.86507	9.88371	22.1578
ENSG00000064601.12	CTSA	protein_coding	chr20	44518783	44527459	+	9	19	5856	29.1018	28.4347	94.571	26.2332	25.6714	84.6773	50.2796	50.4459	169.078	51.4636	51.6907	172.338
ENSG00000064607.12	SUGP2	protein_coding	chr19	19101697	19144832	-	16	16	7744	51.6416	49.4113	118.292	51.3429	49.2502	114.481	44.2704	42.4468	100.465	43.3295	41.5075	102.933
ENSG00000064652.6	SNX24	protein_coding	chr5	122179134	122365049	+	17	12	3550	6.84683	6.48719	14.3023	6.93513	6.65175	12.9245	5.84116	5.78851	15.9259	5.6459	5.48369	14.0061
ENSG00000064666.10	CNN2	protein_coding	chr19	1026298	1039068	+	8	12	3928	3.64238	3.71094	8.02997	2.95912	2.95426	5.37348	64.3683	63.9559	140.683	68.2524	67.5107	148.077
ENSG00000064687.8	ABCA7	protein_coding	chr19	1040102	1065571	+	44	17	8365	6.93789	6.43056	18.5134	6.55651	6.07597	18.0881	9.95202	9.1908	25.8796	11.0154	10.1067	24.5204
ENSG00000064692.14	SNCAIP	protein_coding	chr5	121647049	121799914	+	20	25	7325	2.46904	2.5014	6.49654	2.73007	2.67721	7.67587	3.18386	3.22056	8.74327	3.00093	2.96825	7.97625
ENSG00000064703.7	DDX20	protein_coding	chr1	112297867	112310638	+	6	6	6019	3.1196	3.21172	5.4983	2.94991	3.03642	4.82625	9.19398	9.45127	13.5568	8.38324	8.55192	12.5443
ENSG00000064763.6	FAR2	protein_coding	chr12	29302036	29493913	+	18	10	5411	6.93174	6.97656	13.2161	6.71919	6.70236	13.3813	4.42251	4.36464	8.4994	4.04899	4.00418	8.99827
ENSG00000064886.9	CHI3L2	protein_coding	chr1	111743393	111786062	+	15	17	3295	7.35573	7.44838	17.1089	6.85382	6.97851	15.8521	10.2322	10.2416	26.6417	9.63544	9.71378	22.7932
ENSG00000064932.11	SBNO2	protein_coding	chr19	1107636	1174282	-	33	10	6476	5.45382	5.35089	8.14445	5.646	5.44928	9.46595	20.719	20.656	34.5295	21.9042	21.5966	34.7398
ENSG00000064933.12	PMS1	protein_coding	chr2	190649107	190742355	+	16	19	5152	4.22145	4.08315	7.46023	5.16949	4.92104	10.8343	9.2503	8.90631	18.2501	8.95197	8.47965	17.7186
ENSG00000064961.14	HMG20B	protein_coding	chr19	3572775	3579086	+	6	16	3857	8.05204	8.1313	20.5761	6.98228	6.9625	18.7917	59.2239	59.3803	147.49	65.6318	65.9349	158.776
ENSG00000064989.8	CALCRL	protein_coding	chr2	188207856	188313187	-	18	9	6144	2.5274	2.48193	4.66608	3.34795	3.34308	5.5505	1.23366	1.22248	2.72718	1.353	1.34969	2.75129
ENSG00000064995.12	TAF11	protein_coding	chr6	34845555	34855866	-	5	2	1580	24.993	22.6006	22.6006	25.0675	22.2145	22.2145	51.9831	47.3198	48.402	46.2933	41.4752	42.0675
ENSG00000065000.11	AP3D1	protein_coding	chr19	2100988	2164464	-	29	14	8618	33.4091	33.8672	72.2221	32.8928	33.4253	69.7182	38.1364	38.4428	73.9817	39.8998	40.2052	80.8293
ENSG00000065029.10	ZNF76	protein_coding	chr6	35226686	35263762	+	12	12	6789	10.6932	10.1659	35.9861	9.66594	9.03077	29.9401	12.4303	11.6555	37.9394	12.5016	11.8236	39.1165
ENSG00000065054.9	SLC9A3R2	protein_coding	chr16	2075357	2089027	+	11	9	3550	34.4937	34.3097	92.6258	32.8387	32.6815	89.0476	11.868	11.9048	32.597	13.1556	13.0896	36.4443
ENSG00000065057.3	NTHL1	protein_coding	chr16	2089816	2097867	-	8	9	1658	14.8406	14.3389	23.3044	13.9934	13.5525	22.1654	21.8026	21.4063	33.8556	22.5255	21.5003	34.7773
ENSG00000065135.7	GNAI3	protein_coding	chr1	110091233	110136975	+	9	1	3206	14.9115	14.7485	14.7485	16.9215	16.5593	16.5593	49.0074	49.858	49.858	46.9142	47.6855	47.6855
ENSG00000065150.14	IPO5	protein_coding	chr13	98605912	98676551	+	37	29	9671	26.8126	27.2744	54.842	27.7617	28.2237	58.7036	69.8475	71.4073	171.984	66.3218	67.6555	164.079
ENSG00000065154.7	OAT	protein_coding	chr10	126085872	126107545	-	14	8	3388	79.4672	80.6543	136.302	75.7875	77.2798	131.858	40.7557	41.1925	71.2753	41.6614	42.139	72.7888
ENSG00000065183.11	WDR3	protein_coding	chr1	118472343	118509165	+	28	4	10275	3.69298	3.72073	6.49167	3.81903	3.8357	7.99359	16.5174	16.545	39.4419	14.9047	14.8616	36.6757
ENSG00000065268.6	WDR18	protein_coding	chr19	983174	994569	+	10	11	2474	19.2769	18.0349	34.9707	16.7305	15.4103	32.2307	27.9319	27.4517	48.5966	32.3567	31.5462	58.5155
ENSG00000065308.4	TRAM2	protein_coding	chr6	52362200	52441713	-	11	1	6908	2.62475	2.54811	2.54811	2.63652	2.70085	2.70085	39.5108	39.988	39.988	39.3743	39.7748	39.7748
ENSG00000065320.4	NTN1	protein_coding	chr17	8924859	9147317	+	9	4	6431	3.1741	3.20014	3.47754	3.2021	3.2013	3.4788	1.47029	1.51336	1.64455	1.41322	1.40739	1.56506
ENSG00000065325.8	GLP2R	protein_coding	chr17	9725523	9795419	+	16	4	6052	0.928873	0.904696	1.19755	0.846876	0.791385	1.0962	2.32471	2.20245	3.98848	1.98627	1.9258	2.80694
ENSG00000065328.12	MCM10	protein_coding	chr10	13203554	13253104	+	19	7	5454	0.0253455	0.0264182	0.0456398	0.0209761	0.0218447	0.107309	12.317	12.2197	18.8218	11.6824	11.6536	18.1995
ENSG00000065357.15	DGKA	protein_coding	chr12	56321103	56347811	+	18	49	10215	4.89877	4.70409	24.7889	4.5336	4.39241	24.6341	5.10718	5.09778	27.6512	4.97526	4.79899	26.9704
ENSG00000065427.10	KARS	protein_coding	chr16	75661622	75682541	-	17	12	3815	35.232	35.9173	68.62	33.3106	33.9028	64.1682	121.945	124.664	235.373	119.127	121.844	230.048
ENSG00000065491.8	TBC1D22B	protein_coding	chr6	37225548	37300746	+	13	1	3462	10.3749	10.4533	10.4533	10.839	10.9643	10.9643	12.8872	12.8262	12.8262	13.3709	13.3128	13.3128
ENSG00000065518.7	NDUFB4	protein_coding	chr3	120315156	120321347	+	2	6	1889	88.8877	89.3188	244.987	83.4803	83.96	230.626	68.8027	69.6383	192.189	71.7449	73.3698	202.709
ENSG00000065534.14	MYLK	protein_coding	chr3	123328896	123603178	-	38	21	22166	5.4464	5.44288	47.234	5.74032	5.70926	44.6977	2.08942	2.11422	10.4504	1.84671	1.84088	9.23393
ENSG00000065600.8	TMEM206	protein_coding	chr1	212537273	212588243	-	12	5	2914	15.4016	15.5177	24.9442	15.8375	15.9945	24.9037	9.61273	9.31176	14.2281	9.90553	9.64774	16.1367
ENSG00000065609.10	SNAP91	protein_coding	chr6	84262599	84419410	-	38	24	6657	81.881	81.1329	137.634	86.3709	86.0349	139.035	0.0837757	0.0874014	0.172859	0.11286	0.113934	0.442693
ENSG00000065613.9	SLK	protein_coding	chr10	105726959	105788991	+	19	3	7974	12.8082	12.8894	14.7808	14.2754	14.5109	15.0719	16.1019	16.487	17.1476	14.9414	15.2154	17.6218
ENSG00000065615.9	CYB5R4	protein_coding	chr6	84569362	84677143	+	19	3	9635	2.67096	2.51731	7.01955	3.08718	3.02458	7.94945	2.60207	2.51705	10.2089	2.34685	2.26711	10.306
ENSG00000065621.10	GSTO2	protein_coding	chr10	106028631	106064703	+	13	9	10344	2.5302	2.43066	10.7811	2.29825	2.17457	7.92382	1.4655	1.34484	9.85549	1.26755	1.16095	8.27781
ENSG00000065675.10	PRKCQ	protein_coding	chr10	6469105	6622263	-	18	3	3285	6.08765	6.09673	6.19355	5.809	5.8972	6.11684	6.70592	6.71436	6.71436	6.01282	6.05689	6.24773
ENSG00000065717.10	TLE2	protein_coding	chr19	2997636	3047633	-	25	23	4038	57.2554	56.1221	108.552	54.1534	53.1974	102.627	7.15669	6.90972	11.3868	8.13859	7.97652	14.169
ENSG00000065802.7	ASB1	protein_coding	chr2	239335383	239360891	+	6	9	7410	12.2813	12.3862	23.1073	12.4408	12.6569	24.0229	10.7488	10.8429	22.4065	11.2184	11.2796	24.8479
ENSG00000065833.7	ME1	protein_coding	chr6	83920108	84140797	-	14	3	3378	13.3201	13.2938	17.4857	14.3462	14.3054	18.125	12.6524	12.7537	17.2388	12.0748	11.8701	16.4605
ENSG00000065883.10	CDK13	protein_coding	chr7	39989636	40136733	+	15	5	8921	8.6232	8.63011	15.5786	9.65399	9.66642	18.1602	14.5262	14.6301	25.3185	13.5509	13.6626	23.5873
ENSG00000065911.7	MTHFD2	protein_coding	chr2	74425689	74444692	+	9	10	4870	3.38254	3.23476	8.30411	3.87611	3.97789	10.7856	57.7579	57.526	153.986	55.4684	55.1634	148.871
ENSG00000065970.4	FOXJ2	protein_coding	chr12	8185299	8208099	+	12	3	6296	13.7334	13.9942	16.1047	13.8789	14.2227	16.5585	10.7503	10.9047	12.5231	11.3826	11.5206	13.3947
ENSG00000065978.13	YBX1	protein_coding	chr1	43148098	43168020	+	8	4	1930	100.298	101.369	135.834	105.038	106.017	140.894	777.069	796.366	1019.11	763.324	781.552	999.185
ENSG00000065989.11	PDE4A	protein_coding	chr19	10527449	10580305	+	19	10	6644	22.089	22.3768	37.3402	21.5239	21.7767	36.5232	5.47134	5.43745	9.27065	5.54824	5.54422	9.41367
ENSG00000066044.9	ELAVL1	protein_coding	chr19	8023463	8070543	-	8	6	6956	19.3097	19.502	23.1185	18.2461	18.5391	21.9464	27.4052	27.3023	79.6221	27.8627	28.1423	81.3844
ENSG00000066056.9	TIE1	protein_coding	chr1	43766664	43788779	+	22	12	6694	4.77027	4.67798	9.90146	4.23161	4.07222	8.42076	1.62081	1.58428	3.14035	1.5894	1.54849	3.5007
ENSG00000066117.10	SMARCD1	protein_coding	chr12	50478755	50494495	+	15	12	5136	19.3518	19.0392	46.2222	18.7421	18.4557	43.1514	43.1232	42.8371	103.415	44.3142	44.3763	103.489
ENSG00000066135.8	KDM4A	protein_coding	chr1	44115829	44171186	+	24	5	5172	14.1077	14.3147	17.4103	14.4221	14.6047	17.6029	23.4039	23.5475	28.0685	22.5394	22.6178	27.0554
ENSG00000066185.8	ZMYND12	protein_coding	chr1	42896000	42921938	-	8	4	2195	2.21469	2.14431	3.59602	2.44965	2.46424	3.83774	0.300271	0.27712	0.342692	0.364364	0.345539	0.991835
ENSG00000066230.6	SLC9A3	protein_coding	chr5	473425	524447	-	17	3	2783	2.03651	1.88972	2.03525	2.26095	2.07202	3.0174	0.0273264	0.028509	0.135163	0.139336	0.109013	0.121159
ENSG00000066248.10	NGEF	protein_coding	chr2	233743396	233877982	-	19	11	4687	63.1892	63.3477	109.965	62.1789	61.9167	108.081	7.20416	7.00246	12.6681	6.93409	6.82348	11.7031
ENSG00000066322.8	ELOVL1	protein_coding	chr1	43829068	43833696	-	10	15	2458	57.2791	56.5279	96.9004	50.0342	49.2074	85.0951	43.8103	43.7912	77.0244	47.5742	47.0462	85.1786
ENSG00000066336.7	SPI1	protein_coding	chr11	47376411	47400127	-	5	4	2069	6.45852	6.37204	9.6586	5.55155	5.25164	7.88416	7.36356	7.24764	11.192	7.61392	7.40495	11.4948
ENSG00000066379.10	ZNRD1	protein_coding	chr6	30026676	30032686	+	2	6	3672	3.90887	4.02851	17.2892	3.38351	3.45223	13.688	13.165	13.173	58.4332	13.1805	13.3019	59.7115
ENSG00000066382.12	MPPED2	protein_coding	chr11	30406040	30608419	-	14	8	8198	2.87497	2.72715	9.13549	2.83847	2.78741	9.37639	0.652452	0.622621	2.43994	0.594215	0.521181	2.52089
ENSG00000066455.8	GOLGA5	protein_coding	chr14	93260576	93306308	+	13	4	3295	17.1168	17.3747	20.63	16.27	16.4592	19.1691	27.2116	28.02	31.6257	25.5891	26.1796	29.1731
ENSG00000066468.16	FGFR2	protein_coding	chr10	123237848	123357972	-	31	22	7543	33.1643	33.0747	84.9961	32.6756	32.6638	79.3768	3.26996	3.28526	6.48727	3.26441	3.20758	6.3448
ENSG00000066629.12	EML1	protein_coding	chr14	100204030	100408397	+	32	20	8899	4.77403	4.84384	12.7881	4.88778	4.9536	11.1827	6.41791	6.52033	16.9579	6.52804	6.62518	20.9638
ENSG00000066651.13	TRMT11	protein_coding	chr6	126307576	126360422	+	17	12	2690	11.7765	11.1768	17.9236	11.8402	10.8866	17.5929	13.1461	12.1813	19.3985	13.1269	12.3496	19.0171
ENSG00000066654.8	THUMPD1	protein_coding	chr16	20744986	20753406	-	4	6	5092	12.8407	12.7286	17.698	14.9138	14.8248	20.4844	19.1915	19.1496	28.4418	17.3819	17.323	25.2612
ENSG00000066735.10	KIF26A	protein_coding	chr14	104605060	104647231	+	15	2	6756	0.699084	0.65758	0.661694	0.667187	0.624273	0.628178	4.66021	4.60745	4.63627	5.06166	5.0257	5.07986
ENSG00000066777.4	ARFGEF1	protein_coding	chr8	68085747	68255912	-	40	9	10970	7.17425	7.17797	19.0848	7.84662	7.83702	20.0244	10.0567	10.0604	20.9548	10.0699	10.0851	20.4859
ENSG00000066813.10	ACSM2B	protein_coding	chr16	20547548	20587749	-	17	19	8155	0	0	0	0	0	0	0.432081	0.389163	1.95619	0.490361	0.449525	2.02221
ENSG00000066827.11	ZFAT	protein_coding	chr8	135490031	135725292	-	23	17	8900	1.40564	1.40037	4.21046	1.31115	1.30653	3.32522	2.22166	2.23164	5.07787	2.22751	2.26969	5.69734
ENSG00000066855.11	MTFR1	protein_coding	chr8	66556969	66683496	+	16	15	4629	2.06551	2.02841	4.19645	2.39237	2.4451	6.39249	9.56709	9.67261	20.8493	8.85344	8.9407	19.7008
ENSG00000066926.6	FECH	protein_coding	chr18	55215515	55254004	-	13	10	4473	8.84376	8.77243	15.8303	9.28428	9.21591	15.2296	15.1713	15.4199	30.6594	14.2228	14.4977	28.3636
ENSG00000067048.12	DDX3Y	protein_coding	chrY	15016019	15032390	+	16	9	5738	16.7634	16.6818	33.9834	20.0257	19.879	33.7051	14.7424	14.4909	27.0989	14.4156	14.2624	29.5233
ENSG00000067057.12	PFKP	protein_coding	chr10	3108525	3179904	+	29	12	4827	85.0781	83.5046	165.099	80.2652	79.1311	156.39	65.3832	63.9667	124.967	70.026	68.6755	131.548
ENSG00000067082.10	KLF6	protein_coding	chr10	3818188	3827473	-	4	7	6139	11.4163	11.301	16.252	12.6834	12.4012	17.7864	33.3771	32.7365	55.8384	33.5842	33.189	55.0176
ENSG00000067141.12	NEO1	protein_coding	chr15	73344051	73597547	+	32	11	8117	26.3572	26.3513	40.2006	25.6207	25.566	36.4876	12.742	12.7461	22.7031	12.9673	13.0692	24.2855
ENSG00000067167.3	TRAM1	protein_coding	chr8	71485677	71520622	-	13	6	3878	10.3789	10.1122	21.2117	13.2989	12.8788	25.0317	41.2538	40.6319	86.0384	38.4472	38.2749	84.0552
ENSG00000067177.10	PHKA1	protein_coding	chrX	71798664	71934167	-	33	5	6350	3.44317	3.3355	3.45723	3.36906	3.25339	3.37377	12.635	12.5987	14.6112	11.7018	11.6536	14.1191
ENSG00000067182.3	TNFRSF1A	protein_coding	chr12	6437923	6451280	-	8	16	4005	13.904	13.9708	30.3079	13.9513	14.1244	29.6561	41.3888	41.3377	99.6912	43.4367	43.7715	102.002
ENSG00000067191.11	CACNB1	protein_coding	chr17	37329709	37353956	-	17	11	7094	22.1297	22.4163	45.8718	21.2778	21.5273	43.8765	2.49067	2.40087	6.3316	2.83558	2.71921	6.79616
ENSG00000067221.9	STOML1	protein_coding	chr15	74275547	74286963	-	8	13	6178	10.8819	11.1325	36.4076	11.1922	11.4165	38.2316	2.42501	2.45719	8.67183	3.04417	3.061	10.5878
ENSG00000067225.13	PKM	protein_coding	chr15	72491370	72524164	-	15	25	8572	214.031	220.416	843.925	204.125	210.345	804.739	408.033	421.116	1604.52	417.701	430.551	1636.63
ENSG00000067248.5	DHX29	protein_coding	chr5	54552073	54603550	-	26	4	4728	10.7058	10.5697	11.2896	12.0453	11.7679	12.5769	18.3528	18.3249	19.2436	17.1413	17.0952	18.2695
ENSG00000067334.9	DNTTIP2	protein_coding	chr1	94333373	94345474	-	7	7	5985	10.3281	10.2918	24.5307	10.4177	10.5385	23.0707	22.5924	23.009	53.0313	20.4333	20.6733	48.5179
ENSG00000067365.10	METTL22	protein_coding	chr16	8715540	8740081	+	17	18	4824	4.61355	4.04716	15.9821	4.41584	4.07509	17.5276	8.10835	7.09416	30.7722	7.98311	6.86029	31.2462
ENSG00000067369.9	TP53BP1	protein_coding	chr15	43699407	43802926	-	33	17	8843	14.4284	14.5041	27.5836	15.2426	15.1894	29.3245	16.8903	17.0052	29.6812	16.1672	16.2161	29.7426
ENSG00000067533.5	RRP15	protein_coding	chr1	218458629	218511325	+	5	2	7883	2.26212	2.26951	3.80271	2.57746	2.50887	5.20341	8.00722	8.14575	21.5366	7.15727	7.26739	20.7443
ENSG00000067596.6	DHX8	protein_coding	chr17	41561233	41621831	+	25	7	9302	6.60312	6.5547	17.6809	7.13825	6.94711	18.7225	14.3536	14.3294	32.7437	13.3502	13.2824	31.2031
ENSG00000067606.11	PRKCZ	protein_coding	chr1	1981909	2116834	+	36	27	7636	49.7561	49.6447	189.518	47.3856	47.2288	179.601	5.00953	4.91116	19.3928	4.77033	4.64848	17.6954
ENSG00000067646.7	ZFY	protein_coding	chrY	2803112	2850547	+	9	7	5737	1.79108	1.76642	3.14434	2.13772	2.1847	3.48477	0.923497	0.940415	1.73326	1.00542	1.02238	1.51788
ENSG00000067798.9	NAV3	protein_coding	chr12	78224685	78606790	+	44	17	11179	8.08501	8.16725	14.6187	8.78471	8.88414	16.4619	2.04313	2.02509	5.02923	1.95767	1.98565	4.06263
ENSG00000067829.14	IDH3G	protein_coding	chrX	153051221	153059978	-	14	11	2710	43.7403	42.9153	81.0315	39.8683	38.5999	73.6223	33.7685	31.5508	61.2414	36.9975	34.8536	66.7813
ENSG00000067836.8	ROGDI	protein_coding	chr16	4846969	4852951	-	7	16	3683	63.3309	63.5334	149.025	58.0748	58.0662	139.162	8.38339	8.28663	20.0719	8.65984	8.45705	20.1846
ENSG00000067840.8	PDZD4	protein_coding	chrX	153067621	153096020	-	12	9	4381	174.363	172.785	281.173	167.352	165.176	265.241	8.68523	8.34878	11.9526	9.63122	9.08903	12.3093
ENSG00000067842.13	ATP2B3	protein_coding	chrX	152783134	152848397	+	24	8	7534	23.1155	23.2236	28.7437	22.7168	22.8193	28.083	0.070659	0.063186	0.0849513	0.0643369	0.0570471	0.178025
ENSG00000067955.9	CBFB	protein_coding	chr16	67063019	67134961	+	8	9	4129	5.21714	5.23437	12.0949	6.35608	6.23261	10.561	22.1695	21.9248	54.1414	20.9722	20.9162	52.1882
ENSG00000068028.13	RASSF1	protein_coding	chr3	50367219	50378411	-	7	9	3677	9.79334	9.75063	20.4027	9.47091	9.31224	19.5205	18.6831	17.9165	37.4593	18.4487	18.2275	38.145
ENSG00000068078.13	FGFR3	protein_coding	chr4	1795034	1810599	+	18	9	4834	38.6193	37.9884	46.9211	37.8806	36.8267	45.3367	20.6878	19.4658	25.4288	22.1049	20.9515	30.1058
ENSG00000068079.3	IFI35	protein_coding	chr17	41158742	41166473	+	5	8	1973	4.86939	4.67381	8.09888	4.66197	4.67385	7.71517	14.403	14.3561	25.0001	15.3423	15.223	25.861
ENSG00000068137.10	PLEKHH3	protein_coding	chr17	40819932	40829048	-	13	10	4839	6.87983	6.54073	14.3727	6.6576	6.19956	11.6802	10.6292	10.0399	21.3627	12.7715	12.3092	24.7468
ENSG00000068305.13	MEF2A	protein_coding	chr15	100017370	100256671	+	19	14	7030	24.6155	24.4855	41.5549	27.5708	27.2753	41.9289	17.8783	17.4632	30.9952	16.5789	16.1258	30.6524
ENSG00000068308.9	OTUD5	protein_coding	chrX	48779305	48815648	-	10	7	3329	50.1822	49.1319	64.901	49.3837	48.9877	65.3691	40.1835	39.7855	61.6187	41.1112	40.4936	60.5437
ENSG00000068323.12	TFE3	protein_coding	chrX	48886242	48901012	-	11	5	4278	38.2854	39.1254	51.0492	37.8351	38.5718	50.2087	26.7127	26.8425	36.0415	27.4875	27.8349	36.6814
ENSG00000068354.11	TBC1D25	protein_coding	chrX	48397845	48420997	+	5	6	4223	12.7334	12.8401	17.7737	12.4346	12.4078	15.6271	7.95369	7.98478	11.9563	8.00587	8.00425	13.5166
ENSG00000068383.14	INPP5A	protein_coding	chr10	134351324	134596979	+	17	7	3701	48.5745	48.7485	66.1195	50.7012	50.8691	68.2215	7.43164	7.5246	10.2668	7.79917	7.63035	10.452
ENSG00000068394.9	GPKOW	protein_coding	chrX	48970334	48980151	-	11	1	1735	29.6786	30.2149	30.2149	26.7844	27.2479	27.2479	30.9895	31.3856	31.3856	29.3762	29.6389	29.6389
ENSG00000068400.9	GRIPAP1	protein_coding	chrX	48830134	48858675	-	27	9	5779	39.0895	36.5468	73.9118	37.7281	35.7773	72.4159	18.5682	17.4451	36.5705	19.5093	17.9323	37.7738
ENSG00000068438.10	FTSJ1	protein_coding	chrX	48334541	48344752	+	12	14	2740	18.8853	18.1771	33.693	17.5698	17.0015	29.9471	42.8818	42.4018	73.9202	43.6331	42.684	76.999
ENSG00000068615.12	REEP1	protein_coding	chr2	86441116	86565206	-	11	12	5326	20.409	20.6415	29.3141	20.6211	20.862	30.0914	1.40409	1.38044	2.09723	1.12396	1.13451	1.76158
ENSG00000068654.11	POLR1A	protein_coding	chr2	86247339	86333278	-	36	10	13519	5.29666	5.39647	6.06114	5.19933	5.24364	5.61633	12.5614	12.7569	16.3927	13.5547	13.85	18.1224
ENSG00000068697.6	LAPTM4A	protein_coding	chr2	20232411	20251789	-	7	2	1946	67.152	67.4765	74.801	66.0438	66.9173	77.7359	146.823	149.263	166.399	146.498	148.561	165.321
ENSG00000068745.10	IP6K2	protein_coding	chr3	48725436	48777786	-	17	28	5624	30.7488	30.6923	120.044	29.911	29.8827	118.416	24.6151	24.4107	94.9596	24.7097	24.738	97.3741
ENSG00000068793.13	CYFIP1	protein_coding	chr15	22892005	23006016	+	34	14	10435	8.28392	8.36754	22.8772	8.51862	8.36669	20.1275	15.4212	15.5285	37.6634	15.4379	15.6368	38.3911
ENSG00000068831.14	RASGRP2	protein_coding	chr11	64494383	64512928	-	16	23	6084	6.68376	6.52455	19.9465	6.84092	6.65419	21.5636	2.07915	1.83876	5.98855	2.15508	2.09021	8.23152
ENSG00000068878.10	PSME4	protein_coding	chr2	54091204	54197977	-	49	10	10259	6.73499	6.58463	17.6423	7.06117	6.97031	18.3424	19.6072	19.5767	43.8701	18.162	18.1574	43.2477
ENSG00000068903.15	SIRT2	protein_coding	chr19	39369197	39390502	-	9	18	6204	64.0779	64.6028	199.313	60.7904	61.3334	189.622	9.90864	9.8515	30.3936	10.5279	10.5301	33.0513
ENSG00000068912.9	ERLEC1	protein_coding	chr2	54014181	54045956	+	15	4	2592	45.2516	45.4526	50.3135	50.6255	50.8187	57.0255	50.4159	50.5164	59.0466	47.9478	48.2424	57.0453
ENSG00000068971.9	PPP2R5B	protein_coding	chr11	64685025	64701945	+	18	5	3376	80.2956	77.6475	97.8144	77.9749	74.816	94.7354	11.466	10.4659	13.5671	12.8357	11.8546	15.9467
ENSG00000068976.9	PYGM	protein_coding	chr11	64513861	64527769	-	20	5	4981	7.91405	8.12363	14.5515	7.66674	7.82632	14.0459	0.452947	0.382287	1.12565	0.65686	0.609081	1.10424
ENSG00000068985.4	PAGE1	protein_coding	chrX	49452053	49460596	-	6	1	665	0	0	0	0.0344072	0.0358318	0.0358318	6.78535	6.40292	6.40292	6.81515	6.349	6.349
ENSG00000069011.11	PITX1	protein_coding	chr5	134363425	134370503	-	5	6	3511	0	0	0	0.0325844	0.0339336	0.0928591	11.0901	10.8243	19.6332	12.6873	12.2341	21.1464
ENSG00000069122.14	GPR116	protein_coding	chr6	46820249	46922680	-	26	7	6717	8.92821	8.91279	11.9407	9.00311	9.13112	12.1325	0.150959	0.153555	0.199971	0.1335	0.139263	0.175862
ENSG00000069188.12	SDK2	protein_coding	chr17	71330523	71640228	-	47	6	11607	1.1334	1.12964	1.3099	1.23797	1.25638	1.41219	1.41305	1.40585	1.77141	1.3948	1.38967	2.02455
ENSG00000069248.9	NUP133	protein_coding	chr1	229577045	229644103	-	27	5	5057	17.9228	17.6984	22.7284	18.9761	18.7016	23.6426	31.6509	31.8074	40.3923	29.8861	30.1213	38.3902
ENSG00000069345.7	DNAJA2	protein_coding	chr16	46989299	47007699	-	8	4	5039	29.7647	30.2714	68.6849	32.9203	33.5647	72.8443	25.2391	25.7173	59.5541	24.6926	25.0712	58.54
ENSG00000069399.8	BCL3	protein_coding	chr19	45250962	45263301	+	10	9	3242	3.68825	3.51101	7.71335	2.99243	2.85174	5.44599	11.3534	10.5151	21.1221	11.9384	11.0501	21.2067
ENSG00000069424.10	KCNAB2	protein_coding	chr1	6051526	6161253	+	29	20	9253	69.4709	67.3423	154.445	66.6295	64.8431	148.934	14.8762	14.2509	42.504	16.1659	15.4265	46.9639
ENSG00000069431.6	ABCC9	protein_coding	chr12	21950335	22094336	-	43	6	11421	1.80141	1.81457	3.86368	1.79304	1.77131	3.74345	0.186444	0.180619	0.322388	0.188861	0.17045	0.288823
ENSG00000069482.6	GAL	protein_coding	chr11	68451247	68458643	+	7	2	1300	1.20512	1.12682	1.79078	1.24964	1.28306	2.03909	41.9441	40.3009	64.0479	43.3819	42.2014	67.0682
ENSG00000069509.5	FUNDC1	protein_coding	chrX	44382885	44402247	-	5	2	1399	26.975	27.7218	32.4271	27.4766	27.8819	32.6143	17.3045	17.6753	20.9904	18.2937	18.6497	22.1987
ENSG00000069535.12	MAOB	protein_coding	chrX	43625858	43741693	-	18	5	3050	64.6681	66.0428	80.0782	58.6423	60.0626	72.1766	4.67101	4.81246	5.83241	3.9969	4.15287	4.93618
ENSG00000069667.11	RORA	protein_coding	chr15	60780483	61521518	-	24	14	17033	4.01997	3.99695	6.99864	5.49955	5.45028	8.99778	1.31712	1.30115	3.87033	1.23078	1.20079	3.48399
ENSG00000069696.6	DRD4	protein_coding	chr11	637293	640706	+	5	2	1477	2.69855	1.80472	1.93859	2.16879	1.33902	1.43836	1.59616	0.787855	0.846299	1.47679	0.890088	0.956117
ENSG00000069712.9	KIAA1107	protein_coding	chr1	92632542	92650280	+	9	2	4623	31.4962	30.0034	30.4142	35.1848	33.7914	34.2681	1.44762	1.33293	1.35253	1.41545	1.34531	1.35975
ENSG00000069812.7	HES2	protein_coding	chr1	6472478	6484730	-	5	6	5407	0.00852195	0.0088826	0.0112689	0	0	0	0.379754	0.386407	1.01466	0.47064	0.472253	0.783232
ENSG00000069849.6	ATP1B3	protein_coding	chr3	141594966	141645356	+	13	11	2584	63.3129	61.5222	114.69	62.2934	60.2067	109.283	115.752	116.073	187.622	115.007	115.706	190.756
ENSG00000069943.5	PIGB	protein_coding	chr15	55611158	55647846	+	15	12	4539	1.67502	1.65067	5.80631	2.03654	1.86363	6.06943	4.51817	4.3175	12.9177	4.1434	3.97136	10.9893
ENSG00000069966.14	GNB5	protein_coding	chr15	52413117	52483566	-	17	12	7487	21.719	21.7048	66.9418	21.1663	21.1293	66.7124	6.59561	6.60553	23.044	6.21511	6.19976	21.3392
ENSG00000069998.8	CECR5	protein_coding	chr22	17618401	17646177	-	8	7	4936	8.4903	8.3631	21.7466	8.04257	7.71423	20.4694	18.3241	17.7723	48.6658	19.7382	19.5607	53.5362
ENSG00000070010.14	UFD1L	protein_coding	chr22	19437433	19466738	-	10	11	8736	6.87797	6.93814	33.2556	6.85428	6.90624	31.3825	16.5371	16.7473	103.178	16.4179	16.5189	94.8311
ENSG00000070018.4	LRP6	protein_coding	chr12	12268959	12419946	-	23	7	10337	5.19533	5.26652	6.85414	5.52264	5.54846	6.37859	9.15456	9.20792	11.3955	8.19189	8.25447	10.6255
ENSG00000070047.7	PHRF1	protein_coding	chr11	576486	612222	+	18	6	5769	15.4353	15.4433	16.702	14.0481	13.874	15.0798	17.8973	18.0163	19.7163	20.9673	20.9784	23.1161
ENSG00000070061.10	IKBKAP	protein_coding	chr9	111629797	111696396	-	39	4	6048	27.3361	26.0907	39.6866	27.4849	26.2433	45.3445	30.6687	30.1594	43.7067	30.0302	29.3367	44.7584
ENSG00000070159.9	PTPN3	protein_coding	chr9	112137746	112260590	-	30	7	10071	3.28738	3.33351	8.36566	3.38747	3.48988	10.9561	5.67859	5.68538	16.3729	5.60711	5.68348	16.9612
ENSG00000070182.13	SPTB	protein_coding	chr14	65213002	65346601	-	38	9	14771	18.834	19.0848	32.4376	19.0872	19.3516	33.2744	1.37123	1.35359	2.90554	1.47176	1.48566	3.37811
ENSG00000070190.8	DAPP1	protein_coding	chr4	100737990	100791311	+	10	4	4548	0.248222	0.237607	0.402376	0.216331	0.21481	0.336181	2.92069	2.94823	6.19617	2.66976	2.65716	5.64964
ENSG00000070214.11	SLC44A1	protein_coding	chr9	108006903	108201452	+	21	8	12613	27.5198	27.2546	88.1163	28.1071	27.701	85.7123	12.9231	13.0714	24.5556	12.2802	12.3814	25.1874
ENSG00000070367.11	EXOC5	protein_coding	chr14	57670518	57735726	-	20	10	9269	7.86695	7.99002	22.8572	8.43742	8.56313	25.9648	10.3352	10.4829	31.9089	9.43386	9.5438	29.9396
ENSG00000070388.7	FGF22	protein_coding	chr19	639879	643703	+	3	4	2110	1.57234	1.35435	3.1501	1.71335	1.01637	2.37675	0.0720846	0.0376022	0.10076	0.264181	0.203693	0.381096
ENSG00000070404.5	FSTL3	protein_coding	chr19	676392	683385	+	6	9	3144	8.37585	8.47827	12.6691	6.86278	6.92715	9.56817	22.302	22.4176	31.3647	25.5462	25.5955	35.6944
ENSG00000070423.13	RNF126	protein_coding	chr19	647526	663277	-	10	12	3677	16.9739	16.7322	48.2886	16.0109	15.8055	45.7504	23.054	22.3112	67.963	26.8854	26.2239	75.8171
ENSG00000070444.10	MNT	protein_coding	chr17	2287354	2304412	-	11	9	8728	8.81124	8.78518	16.6877	8.66942	8.67894	16.5055	9.43065	9.43275	21.3213	10.2213	10.2107	22.9721
ENSG00000070476.10	ZXDC	protein_coding	chr3	126156444	126194762	-	9	4	7357	5.01994	4.68075	11.2991	4.64333	4.28823	10.3876	9.00353	8.50527	19.7806	8.85491	8.41242	20.4309
ENSG00000070495.10	JMJD6	protein_coding	chr17	74708919	74722866	-	8	7	5949	12.0172	12.1382	19.7162	12.1462	12.0923	20.4939	11.4242	11.1851	37.4289	11.354	11.2832	38.6582
ENSG00000070501.7	POLB	protein_coding	chr8	42195972	42229326	+	18	18	4106	24.094	22.6163	89.2571	25.9791	24.5652	98.6266	10.3103	10.3701	38.3398	9.07216	8.86037	33.3797
ENSG00000070526.10	ST6GALNAC1	protein_coding	chr17	74620843	74639920	-	11	11	3448	1.30965	1.31632	2.46457	1.20774	1.15409	2.09266	2.7423	2.64622	5.84912	3.65504	3.54886	7.81388
ENSG00000070601.5	FRMPD1	protein_coding	chr9	37650997	37746901	+	20	5	6724	1.53503	1.55713	2.12997	1.41899	1.44939	1.96052	0	0	0	0.0216262	0.0225597	0.0357779
ENSG00000070610.10	GBA2	protein_coding	chr9	35736863	35749983	-	15	9	5079	53.2045	52.4254	90.9701	49.8701	49.3734	83.6641	23.5081	22.7915	50.7446	25.5527	24.5154	48.3549
ENSG00000070614.10	NDST1	protein_coding	chr5	149865381	149937773	+	21	8	9043	25.1792	25.2224	31.3275	24.619	24.6345	30.1122	14.9245	15.082	18.3754	14.349	14.4512	18.7405
ENSG00000070669.12	ASNS	protein_coding	chr7	97481430	97501854	-	14	17	4455	41.0773	40.5464	100.231	38.8331	37.7667	99.6483	56.7141	56.7346	136.282	55.957	55.9097	133.892
ENSG00000070718.7	AP3M2	protein_coding	chr8	42010464	42029191	+	11	17	6276	25.0838	25.361	46.8386	25.5859	25.7911	47.1067	11.0188	11.0659	24.6825	10.3415	10.1313	22.4655
ENSG00000070729.9	CNGB1	protein_coding	chr16	57917503	58005020	-	36	9	6039	0.782086	0.711794	1.41365	1.00025	0.765469	2.65473	0.184698	0.175174	0.82452	0.192634	0.180017	0.785636
ENSG00000070731.5	ST6GALNAC2	protein_coding	chr17	74559792	74583038	-	10	10	7558	0.240816	0.222412	0.707412	0.360256	0.349951	1.14572	8.43874	7.81718	29.4728	8.47833	7.88095	29.1772
ENSG00000070761.3	C16orf80	protein_coding	chr16	58147496	58163354	-	5	7	2371	25.6141	25.8169	48.3063	24.7047	24.9236	45.7854	26.3655	26.8149	50.1343	25.8507	25.911	46.6306
ENSG00000070770.4	CSNK2A2	protein_coding	chr16	58191811	58231824	-	13	6	6905	12.1051	12.1723	29.4812	12.3434	12.461	29.0544	28.4666	28.6836	65.3806	27.0506	27.3726	64.031
ENSG00000070778.8	PTPN21	protein_coding	chr14	88932122	89021077	-	22	9	7396	4.07763	3.98071	6.04884	3.91349	3.86934	5.43721	4.10271	4.0693	6.60067	3.92896	3.81827	6.27935
ENSG00000070808.11	CAMK2A	protein_coding	chr5	149599054	149669854	-	20	7	6150	255.382	254.636	305.794	246.082	244.508	296.215	0.177242	0.176312	0.43656	0.106401	0.106883	0.169116
ENSG00000070814.13	TCOF1	protein_coding	chr5	149737202	149779871	+	23	16	11278	8.155	8.19776	20.9984	8.0949	8.15753	20.2301	26.8085	27.1035	66.4536	26.52	26.804	65.9072
ENSG00000070886.6	EPHA8	protein_coding	chr1	22890057	22930087	+	17	3	5358	0.76969	0.766408	1.59058	0.845538	0.880549	1.69846	0.165592	0.172758	0.449469	0.28949	0.283112	0.672213
ENSG00000070950.5	RAD18	protein_coding	chr3	8817088	9005457	-	15	10	6983	1.61996	1.65757	2.01894	1.6416	1.66862	2.04269	9.70356	9.78265	17.3997	9.1244	9.23951	16.4977
ENSG00000070961.10	ATP2B1	protein_coding	chr12	89981828	90103077	-	21	11	9491	41.9855	42.3707	68.3564	47.6034	47.9501	72.9204	14.7302	14.8549	32.5514	13.7304	13.8463	31.4776
ENSG00000071051.9	NCK2	protein_coding	chr2	106361354	106510730	+	7	6	2990	30.8138	29.4514	38.0365	29.944	28.801	37.9742	19.4405	18.274	24.1357	20.5233	19.7182	25.2622
ENSG00000071073.8	MGAT4A	protein_coding	chr2	99235569	99347589	-	20	9	9630	10.3496	10.5034	15.253	11.7778	12.0329	17.1605	7.08109	7.18432	13.8104	6.29675	6.36905	12.3872
ENSG00000071082.6	RPL31	protein_coding	chr2	101618177	101640494	+	5	11	5791	80.603	82.5089	944.603	79.899	81.7548	917.339	193.689	199.505	2378.6	198.209	203.893	2414.83
ENSG00000071189.17	SNX13	protein_coding	chr7	17830385	17980124	-	31	13	16417	4.43464	4.47897	15.3257	5.26549	5.24258	18.9206	4.49647	4.53803	19.3296	4.21028	4.23496	20.8341
ENSG00000071243.11	ING3	protein_coding	chr7	120590803	120617270	+	12	6	5214	4.32591	4.2833	11.3585	4.4761	4.25928	11.8511	6.0044	5.93964	20.8632	5.10837	5.0913	16.0919
ENSG00000071282.7	LMCD1	protein_coding	chr3	8543393	8609805	+	8	8	2578	5.79999	5.72874	9.44098	6.44354	6.47002	9.57659	7.424	7.40676	11.097	6.7687	6.64901	10.5322
ENSG00000071462.7	WBSCR22	protein_coding	chr7	73097355	73119491	+	12	19	7944	7.61299	7.55731	40.3469	7.45411	7.30983	37.9859	19.8867	19.4623	117.154	21.5388	21.0969	129.387
ENSG00000071537.9	SEL1L	protein_coding	chr14	81937893	82000205	-	21	6	9559	16.4424	16.5227	21.0759	18.4741	18.6582	23.1287	22.0799	22.3853	33.4998	20.4808	20.7143	31.5716
ENSG00000071539.9	TRIP13	protein_coding	chr5	892758	919472	+	15	7	3560	1.08077	1.03207	1.37506	0.906233	0.903597	1.20389	36.7002	36.4759	54.5361	34.2363	33.9673	52.2688
ENSG00000071553.12	ATP6AP1	protein_coding	chrX	153656978	153664862	+	9	9	4884	94.1612	95.4714	220.981	87.5222	89.1312	205.353	59.2117	60.1444	136.758	60.2568	61.2947	140.399
ENSG00000071794.11	HLTF	protein_coding	chr3	148747914	148804341	-	27	9	6024	14.5065	14.1119	19.7094	16.6972	16.3443	23.3937	30.2354	30.0688	41.3039	26.1226	26.05	37.1912
ENSG00000071859.10	FAM50A	protein_coding	chrX	153672473	153679002	+	12	7	2567	36.5556	35.7639	68.5207	33.9156	32.6558	61.7845	51.4896	50.0708	99.5585	53.0221	50.879	99.9219
ENSG00000071889.12	FAM3A	protein_coding	chrX	153733350	153744566	-	9	21	6240	13.8678	13.989	51.0548	12.5258	12.59	47.0298	12.2808	12.185	44.1179	13.0772	13.0056	48.0245
ENSG00000071909.14	MYO3B	protein_coding	chr2	171034655	171511681	+	39	10	8236	0.0419605	0.0437362	0.0679132	0.0444503	0.0462908	0.0718799	0.532481	0.536258	0.77085	0.400201	0.380641	0.628563
ENSG00000071967.7	CYBRD1	protein_coding	chr2	172378757	172414643	+	9	7	5176	12.6857	12.8097	15.658	14.0883	14.3954	17.6329	18.7185	19.0994	26.7384	16.7112	17.0321	23.824
ENSG00000071991.4	CDH19	protein_coding	chr18	64168320	64271375	-	14	5	6864	2.34285	2.34404	3.57832	2.97677	3.06531	4.38828	0.502268	0.508593	1.11049	0.533157	0.526707	0.982302
ENSG00000071994.6	PDCD2	protein_coding	chr6	170884383	170893780	-	8	14	6476	7.16503	6.84158	30.1631	7.37018	7.1823	30.822	20.813	20.8112	105.992	19.9095	20.0624	102.356
ENSG00000072041.12	SLC6A15	protein_coding	chr12	85253492	85307394	-	15	11	8556	10.7467	10.8619	27.6223	11.6704	11.8194	28.9842	7.10481	7.24538	16.62	6.13257	6.14614	14.2839
ENSG00000072062.9	PRKACA	protein_coding	chr19	14202500	14228896	-	12	10	6144	46.3857	47.5279	125.607	46.0781	47.1871	130.752	26.0594	26.6406	81.2026	27.9791	28.796	86.8857
ENSG00000072071.12	LPHN1	protein_coding	chr19	14260750	14316999	-	25	8	6292	46.7995	47.1008	57.8029	43.7288	44.0435	55.3035	11.9255	11.849	17.3507	12.4607	12.424	17.7364
ENSG00000072133.6	RPS6KA6	protein_coding	chrX	83318984	83442933	-	25	4	2890	2.56699	2.25184	2.73956	2.87395	2.60543	3.07451	2.12271	1.99495	2.26361	1.50949	1.41719	1.60948
ENSG00000072135.8	PTPN18	protein_coding	chr2	131113580	131132982	+	13	16	5774	14.9311	14.465	37.9198	14.4204	14.093	37.8083	14.0403	13.9242	36.0207	15.2197	14.966	38.5575
ENSG00000072163.14	LIMS2	protein_coding	chr2	128395956	128439360	-	14	18	8487	3.23584	3.05588	15.1015	2.8847	2.69811	12.4667	1.2993	1.32125	7.76768	1.28789	1.30178	6.69428
ENSG00000072182.8	ASIC4	protein_coding	chr2	220378892	220403494	+	7	5	5250	3.76086	3.67302	7.45731	3.71758	3.61734	7.60269	1.82035	1.7329	3.63722	1.9804	1.73843	3.3724
ENSG00000072195.10	SPEG	protein_coding	chr2	220299568	220363009	+	49	25	17910	8.58017	8.46058	44.1103	8.13922	7.88552	40.2613	2.24057	2.16773	10.783	2.35862	2.26704	12.2108
ENSG00000072201.9	LNX1	protein_coding	chr4	54325468	54567572	-	20	9	5725	9.97623	9.70212	14.82	10.6351	10.2763	15.741	2.71431	2.73939	4.87038	2.62465	2.59664	4.4984
ENSG00000072274.8	TFRC	protein_coding	chr3	195754054	195809060	-	21	17	7887	15.6077	15.8998	26.9857	17.1453	17.4383	31.7959	92.0331	93.7225	158.383	86.111	87.828	153.493
ENSG00000072315.3	TRPC5	protein_coding	chrX	111017543	111326004	-	11	1	5839	0.974594	0.966487	0.966487	0.940467	0.918195	0.918195	0.0173658	0.0181174	0.0181174	0.012452	0.0129895	0.0129895
ENSG00000072364.8	AFF4	protein_coding	chr5	132211071	132299326	-	24	9	11297	15.7972	15.913	19.4503	18.9171	19.2532	23.9682	17.5835	17.8622	23.2277	15.8947	16.1109	21.3639
ENSG00000072401.10	UBE2D1	protein_coding	chr10	60094735	60130513	+	7	3	3486	4.75851	4.64989	6.89279	6.18949	5.87844	8.60962	4.14497	4.08159	6.66576	4.42166	4.2064	5.84221
ENSG00000072415.4	MPP5	protein_coding	chr14	67707826	67802536	+	17	7	8743	8.05565	8.17408	13.9578	8.40593	8.56048	14.831	6.6745	6.75767	11.5953	6.43661	6.4976	11.366
ENSG00000072501.13	SMC1A	protein_coding	chrX	53401070	53449677	-	26	6	10674	13.1125	13.3772	15.6705	13.6054	13.979	16.4974	48.4742	49.7793	103.327	45.1224	46.047	94.3401
ENSG00000072518.16	MARK2	protein_coding	chr11	63606400	63678491	+	25	18	6154	16.3078	16.0224	23.4025	16.1883	15.9874	23.05	16.6499	16.3864	26.8448	16.8791	16.7122	27.5956
ENSG00000072571.15	HMMR	protein_coding	chr5	162887209	162918947	+	18	8	3932	0.0937501	0.0916103	0.140041	0.256041	0.248463	0.3931	21.8619	21.8462	33.985	19.2739	19.2444	31.0335
ENSG00000072682.14	P4HA2	protein_coding	chr5	131527531	131631008	-	24	21	8502	2.89682	2.65788	10.8512	3.15411	2.88393	12.8559	19.3478	19.479	72.8583	19.3669	19.5696	74.7579
ENSG00000072756.12	TRNT1	protein_coding	chr3	3168600	3192563	+	13	11	5518	3.53227	3.25962	9.25738	3.72777	3.42006	9.36999	7.86036	7.18925	21.8773	6.98347	6.36859	18.7619
ENSG00000072778.15	ACADVL	protein_coding	chr17	7120444	7128592	+	7	39	4865	74.5965	70.7392	298.186	73.4395	69.6821	288.993	116.755	113.045	403.244	124.407	120.574	441.762
ENSG00000072803.13	FBXW11	protein_coding	chr5	171288553	171433877	-	19	13	5577	40.9309	40.0451	64.0033	42.5902	41.8926	65.5573	17.8635	17.4463	31.7539	17.5912	17.1538	29.4175
ENSG00000072818.7	ACAP1	protein_coding	chr17	7239848	7254797	+	14	12	7421	0.428432	0.362428	3.67494	0.357657	0.276138	3.55106	3.12559	2.96151	11.3956	3.1156	3.03206	12.387
ENSG00000072832.10	CRMP1	protein_coding	chr4	5749811	5894785	-	18	6	5823	54.4661	55.7236	110.381	53.86	54.9853	109.007	1.83278	1.90301	3.80163	2.08936	2.11443	4.23787
ENSG00000072840.8	EVC	protein_coding	chr4	5712924	5830772	+	26	6	7923	0.939244	0.882003	0.993724	0.75374	0.682695	0.765821	5.18642	4.82005	5.72487	5.42344	4.96193	6.00591
ENSG00000072849.6	DERL2	protein_coding	chr17	5374571	5390131	-	8	13	6386	5.39719	5.29469	24.8267	5.30278	5.11563	21.3049	8.7966	8.61407	49.0823	8.76296	8.41675	52.7012
ENSG00000072954.2	TMEM38A	protein_coding	chr19	16771938	16800840	+	6	3	3005	24.3885	23.9182	28.4146	25.7133	25.8581	29.7121	6.67277	6.40709	7.56966	7.28281	7.07557	8.60071
ENSG00000072958.4	AP1M1	protein_coding	chr19	16308389	16346160	+	15	16	3813	35.4801	36.2196	63.6213	35.9864	36.714	65.1662	36.2529	37.1768	68.9315	39.8462	40.6447	75.1893
ENSG00000073009.8	IKBKG	protein_coding	chrX	153769414	153796782	+	15	17	7462	1.32146	1.32268	7.81893	1.1468	1.15916	6.41189	1.61706	1.60198	9.20136	1.72463	1.72454	9.72765
ENSG00000073060.11	SCARB1	protein_coding	chr12	125261402	125367214	-	18	14	8240	11.3825	11.4854	42.3525	11.2155	11.2577	39.4976	36.8956	37.5102	118.892	39.6683	40.402	127.589
ENSG00000073067.9	CYP2W1	protein_coding	chr7	1022835	1029276	+	8	5	2773	0.0332335	0.0346399	0.0416912	0.00825127	0.00859292	0.0103421	3.78464	3.25221	4.31591	4.04657	3.62864	4.95269
ENSG00000073111.9	MCM2	protein_coding	chr3	127317066	127341276	+	17	9	4899	4.0021	4.05872	5.69941	3.82981	3.93002	5.32002	65.1312	66.5895	94.0141	67.9579	69.493	97.6679
ENSG00000073150.9	PANX2	protein_coding	chr22	50609160	50618723	+	4	3	3102	35.3459	35.7734	37.077	33.1557	33.4455	34.5695	4.21679	4.25435	4.42757	4.29711	4.26256	4.47524
ENSG00000073169.9	SELO	protein_coding	chr22	50639408	50656045	+	9	2	2363	27.2023	23.5771	31.2632	25.7469	22.5677	29.8983	16.5744	14.6168	19.0194	18.246	16.1449	20.807
ENSG00000073350.9	LLGL2	protein_coding	chr17	73521161	73571289	+	29	22	7909	3.61797	3.3369	11.561	3.24306	2.95254	10.0059	22.2343	20.4947	73.2276	24.3491	22.5616	79.1559
ENSG00000073417.10	PDE8A	protein_coding	chr15	85523671	85682376	+	25	16	7886	8.67983	8.48076	22.7182	8.21979	7.81381	21.8761	10.9519	10.6344	24.4178	11.0484	10.7206	26.8416
ENSG00000073464.7	CLCN4	protein_coding	chrX	10125024	10205700	+	13	4	6750	45.7573	46.9182	47.0591	46.1243	47.1233	47.1434	1.19801	1.19109	1.58124	1.21717	1.21728	1.96585
ENSG00000073536.13	NLE1	protein_coding	chr17	33455772	33469334	-	13	7	5463	6.51151	6.63322	8.72584	6.23222	6.38122	8.52892	13.0206	13.2985	25.428	13.8192	14.0316	26.6038
ENSG00000073578.12	SDHA	protein_coding	chr5	218356	256815	+	16	19	8383	36.0743	36.4781	137.298	35.1878	35.7522	130.506	47.9568	48.7167	178.142	49.651	50.6423	184.486
ENSG00000073605.14	GSDMB	protein_coding	chr17	38060848	38076107	-	9	15	5917	6.66214	6.30284	16.1675	6.31474	5.88758	15.1657	8.38423	8.13474	21.0311	8.00348	7.77215	19.1896
ENSG00000073614.7	KDM5A	protein_coding	chr12	389295	498620	-	31	12	12091	4.36735	4.32774	6.84324	4.42249	4.36124	5.95055	11.6088	11.479	18.4408	10.6616	10.5657	17.7883
ENSG00000073670.9	ADAM11	protein_coding	chr17	42836399	42859214	+	28	5	4770	60.0127	57.8	63.9005	58.0318	55.739	60.1448	2.38617	2.10133	2.35434	2.77923	2.43809	2.64605
ENSG00000073712.9	FERMT2	protein_coding	chr14	53323986	53419153	-	19	14	8510	11.1459	11.1182	32.6136	11.5641	11.5277	33.8574	14.9418	14.8799	42.2239	13.3168	13.3035	37.7323
ENSG00000073756.7	PTGS2	protein_coding	chr1	186640923	186649559	-	9	5	5269	1.49105	1.43565	2.32456	1.62845	1.61447	2.77554	17.5173	17.5978	32.6622	15.5607	15.8294	29.9479
ENSG00000073910.15	FRY	protein_coding	chr13	32605437	32870794	+	64	7	16059	11.1358	10.9715	40.808	11.7916	11.6997	41.0542	0.596688	0.597809	2.24919	0.65196	0.659638	1.87615
ENSG00000073921.13	PICALM	protein_coding	chr11	85668727	85780924	-	26	23	5833	46.2441	46.1633	124.128	51.622	51.5739	126.012	51.6122	51.7149	134.128	47.5781	47.8419	127.05
ENSG00000073969.14	NSF	protein_coding	chr17	44668035	44834830	+	25	9	5009	120.094	123.642	176.465	121.612	125.192	177.078	16.7261	17.1912	28.8908	16.2329	16.651	25.6471
ENSG00000074047.16	GLI2	protein_coding	chr2	121493199	121750229	+	16	14	7341	0.564914	0.575737	0.705814	0.52363	0.532328	0.577397	1.77839	1.77249	2.13206	1.97095	1.99059	2.74322
ENSG00000074071.9	MRPS34	protein_coding	chr16	1821891	1823156	-	3	3	1097	64.7909	65.3219	79.2927	60.8624	61.2104	74.3929	117.251	117.239	144.894	129.839	130.235	155.747
ENSG00000074181.4	NOTCH3	protein_coding	chr19	15270444	15311792	-	33	6	8799	8.41808	8.58056	10.1643	8.30042	8.52496	10.6047	11.5326	11.7642	16.7741	12.4498	12.7142	14.8712
ENSG00000074211.9	PPP2R2C	protein_coding	chr4	6322305	6565327	-	17	9	9198	50.9175	50.7121	128.084	53.2492	53.1847	131.528	0.970115	0.96322	2.72591	0.977544	0.989508	2.60546
ENSG00000074266.13	EED	protein_coding	chr11	85955586	85989855	+	10	11	7016	3.68113	3.64524	13.9821	4.07327	4.09929	16.627	7.95613	7.97628	29.3034	7.56502	7.66818	29.532
ENSG00000074356.12	C17orf85	protein_coding	chr17	3714460	3749545	-	14	7	5717	6.52042	6.1873	15.541	7.25605	6.92297	17.6583	14.0738	13.4293	30.0019	13.574	13.0058	30.2769
ENSG00000074370.13	ATP2A3	protein_coding	chr17	3827169	3867736	-	22	16	6866	12.1437	12.4058	18.6223	10.3373	10.6127	16.0884	22.9167	22.6335	40.8544	24.7405	24.7406	45.2064
ENSG00000074410.9	CA12	protein_coding	chr15	63613577	63674360	-	13	6	7313	2.50144	2.51864	4.13215	2.67198	2.737	4.27219	17.5677	17.9627	33.6902	17.2298	17.5898	32.7355
ENSG00000074416.9	MGLL	protein_coding	chr3	127407909	127542051	-	14	14	10056	44.951	46.0366	114.886	44.0459	45.1304	110.107	13.2723	13.5864	35.8406	13.1108	13.4103	35.7247
ENSG00000074527.7	NTN4	protein_coding	chr12	96051583	96184930	-	14	7	4166	9.32403	9.39583	11.9464	9.42473	9.58618	12.2977	19.9829	20.4731	27.0174	21.0768	21.3677	30.2466
ENSG00000074582.8	BCS1L	protein_coding	chr2	219523487	219528166	+	8	20	3379	9.62065	9.18918	28.6459	9.73736	9.21676	30.4598	17.54	16.4676	46.9632	18.2897	17.3285	50.5103
ENSG00000074590.9	NUAK1	protein_coding	chr12	106457118	106533811	-	7	4	7008	39.8549	40.5478	41.6167	41.282	41.8115	43.2785	3.93196	3.87948	4.04438	3.46521	3.51018	3.60271
ENSG00000074621.9	SLC24A1	protein_coding	chr15	65903704	65953333	+	14	12	9084	0.61884	0.61595	2.01752	0.551617	0.566588	2.14903	3.02501	3.01909	8.45722	2.81202	2.79426	6.6841
ENSG00000074657.9	ZNF532	protein_coding	chr18	56529832	56653712	+	22	26	11951	18.9811	18.7857	52.1258	19.3963	19.1846	54.7925	6.88523	6.91323	19.2826	6.55019	6.58756	19.7863
ENSG00000074660.11	SCARF1	protein_coding	chr17	1537152	1549041	-	11	9	4957	3.57415	3.42021	5.15114	3.44804	3.26394	4.93039	0.690381	0.618889	0.998631	0.713821	0.62223	0.953535
ENSG00000074695.5	LMAN1	protein_coding	chr18	56995055	57027194	-	14	5	6767	11.2795	11.2955	15.3496	12.6965	12.8278	16.0414	59.9037	60.5264	78.4341	55.1974	55.9625	74.2541
ENSG00000074696.8	PTPLAD1	protein_coding	chr15	65822756	65870687	+	18	11	4469	55.5176	56.6957	78.9004	59.9027	60.9327	84.8457	63.3943	63.6997	89.2536	58.9705	59.7794	84.1143
ENSG00000074706.9	IPCEF1	protein_coding	chr6	154475631	154677926	-	16	13	8474	20.7118	20.9195	30.9392	21.6873	21.9189	31.0317	0.314105	0.287127	0.73602	0.283141	0.28343	0.375121
ENSG00000074855.6	ANO8	protein_coding	chr19	17434032	17445638	-	17	3	4979	18.7126	17.4788	20.686	17.3984	15.8886	18.7342	10.8496	10.1241	12.2109	11.2198	9.96755	12.059
ENSG00000074935.9	TUBE1	protein_coding	chr6	112391980	112408732	-	11	11	6973	7.47044	7.20458	26.4414	8.17381	8.00993	28.4207	5.36951	5.09746	21.2292	5.21	5.00345	21.375
ENSG00000074964.12	ARHGEF10L	protein_coding	chr1	17866330	18024369	+	33	13	7847	24.6862	23.3194	56.8395	24.1375	22.6864	52.5544	6.88097	6.25867	14.0339	7.23952	6.68536	15.4975
ENSG00000075035.5	WSCD2	protein_coding	chr12	108523248	108644314	+	17	14	6557	32.9617	33.1847	58.0155	33.6285	33.8726	62.9711	0.251294	0.26217	1.1205	0.303085	0.304602	0.674312
ENSG00000075043.13	KCNQ2	protein_coding	chr20	62037542	62103993	-	22	10	4029	28.643	25.7247	35.7793	28.6109	25.7148	35.8037	2.52302	2.43529	6.54511	2.59862	2.3594	6.48382
ENSG00000075089.5	ACTR6	protein_coding	chr12	100592900	100635643	+	15	13	3813	11.9334	11.689	26.8016	13.1176	13.2045	29.2943	8.67596	8.66303	20.2592	8.35824	8.33448	20.5688
ENSG00000075142.9	SRI	protein_coding	chr7	87834433	87856308	-	10	10	4237	37.6554	37.7187	150.527	41.9436	42.2181	160.171	20.6831	20.8042	111.152	22.2451	22.2925	116.806
ENSG00000075188.4	NUP37	protein_coding	chr12	102467967	102513902	-	12	9	2406	2.47053	2.46529	4.68982	2.06364	2.09957	4.10331	27.7098	28.3705	54.2962	27.4792	28.014	53.3994
ENSG00000075213.6	SEMA3A	protein_coding	chr7	83585093	84122040	-	25	7	9371	1.18011	1.17367	2.24198	1.46011	1.41377	2.50008	5.80791	5.69803	17.4585	5.72077	5.65478	17.0219
ENSG00000075218.14	GTSE1	protein_coding	chr22	46692638	46726707	+	11	4	4242	0.347596	0.362306	0.493864	0.33442	0.320181	0.436442	20.1089	19.7884	32.4197	21.6419	21.4199	35.342
ENSG00000075223.9	SEMA3C	protein_coding	chr7	80371854	80551675	-	26	11	6268	3.19783	3.25271	6.52308	4.22718	4.26535	7.21069	26.1586	26.2823	52.6383	23.7717	23.8702	49.3107
ENSG00000075234.12	TTC38	protein_coding	chr22	46663858	46689905	+	18	7	3578	5.03538	4.80551	9.18743	4.38687	4.29547	7.84819	11.6617	11.4051	18.4202	12.5649	12.1534	20.1995
ENSG00000075239.9	ACAT1	protein_coding	chr11	107992243	108018503	+	16	12	5584	15.6537	15.7356	59.6098	14.6365	14.739	52.2908	27.3699	27.8914	95.3292	26.7877	27.2559	91.8395
ENSG00000075240.12	GRAMD4	protein_coding	chr22	46971909	47075688	+	22	7	4886	10.9018	10.739	14.9315	11.2109	11.0168	14.9921	12.7008	12.2167	18.1167	13.9829	13.6707	19.0145
ENSG00000075292.14	ZNF638	protein_coding	chr2	71503691	71662199	+	40	30	14127	16.3526	16.0077	89.2111	16.9804	16.6647	87.8716	17.0775	16.9255	78.823	15.7231	15.6073	71.6169
ENSG00000075303.8	SLC25A40	protein_coding	chr7	87462883	87505672	-	13	8	5081	7.12348	6.89088	15.7724	8.96588	8.87284	17.5105	9.07523	8.49464	17.616	7.84167	7.6627	17.5197
ENSG00000075336.7	TIMM21	protein_coding	chr18	71815746	71826197	+	5	6	3640	10.4309	10.3445	29.4096	10.5352	10.4346	27.0896	12.2849	12.228	32.3894	12.1844	12.0923	31.1798
ENSG00000075340.18	ADD2	protein_coding	chr2	70834750	70995357	-	28	14	12673	30.2019	31.0613	44.2736	29.5755	30.3601	43.2016	6.14691	6.31486	15.288	5.76585	5.91501	15.1056
ENSG00000075399.8	VPS9D1	protein_coding	chr16	89773542	89787394	-	16	7	3428	24.7059	23.0404	32.6834	24.0689	22.0209	30.855	7.52802	6.78916	9.7541	7.89711	7.10962	9.92631
ENSG00000075407.13	ZNF37A	protein_coding	chr10	38383264	38414472	+	8	5	9626	6.46703	6.27919	11.8882	7.18085	7.09696	12.4824	6.87862	6.7587	10.891	5.29228	5.15041	7.99028
ENSG00000075413.13	MARK3	protein_coding	chr14	103851729	103970168	+	25	26	8891	18.3955	18.3205	77.0438	17.8239	17.7123	71.0047	18.1477	18.1597	68.9967	17.3011	17.3712	67.8659
ENSG00000075618.13	FSCN1	protein_coding	chr7	5632439	5646286	+	7	6	3707	69.7947	71.6342	96.1177	65.4636	67.1778	89.7977	86.0128	88.1942	120.007	95.8837	98.1473	133.114
ENSG00000075643.5	MOCOS	protein_coding	chr18	33767482	33852120	+	15	2	6281	0.249428	0.248514	0.334032	0.182143	0.178304	0.181806	12.3137	12.0466	16.527	12.5597	12.2686	14.1476
ENSG00000075702.12	WDR62	protein_coding	chr19	36545783	36596008	+	33	8	9775	0.292261	0.272692	0.562823	0.327704	0.326647	0.684169	9.52788	8.94999	18.0462	10.086	9.56704	19.3945
ENSG00000075856.7	SART3	protein_coding	chr12	108916357	108955176	-	23	16	7270	14.8217	14.5637	32.551	14.6129	14.3231	31.9824	22.6509	22.7836	55.4731	21.8255	21.9435	49.0266
ENSG00000075891.17	PAX2	protein_coding	chr10	102495360	102589698	+	14	10	6243	0.590462	0.553906	0.914172	0.65604	0.65267	1.54046	0.016242	0.016945	0.0260817	0.0116462	0.0121489	0.0186996
ENSG00000075975.11	MKRN2	protein_coding	chr3	12598513	12625212	+	8	3	2848	32.6495	32.9772	34.4952	31.0915	31.4836	31.9615	27.931	28.3505	33.0254	28.1417	28.5132	32.0236
ENSG00000076003.4	MCM6	protein_coding	chr2	136597196	136633996	-	17	3	4118	10.7307	10.9516	13.8059	11.1181	11.2197	13.3638	70.5337	71.8394	86.7413	69.0935	70.3449	84.7126
ENSG00000076108.7	BAZ2A	protein_coding	chr12	56989380	57030600	-	30	18	10918	17.2508	17.1165	37.4149	16.5623	16.4929	33.4684	27.855	27.7791	54.4602	28.2424	28.2783	53.8716
ENSG00000076201.10	PTPN23	protein_coding	chr3	47422501	47454931	+	23	7	5981	25.8241	25.7446	31.592	23.8869	23.7326	27.9139	22.3829	22.2152	27.8228	25.0867	24.8127	29.9329
ENSG00000076242.10	MLH1	protein_coding	chr3	37034823	37107380	+	24	22	3748	10.4561	9.96957	17.2272	10.952	10.7125	19.8467	27.9673	28.0275	46.4369	26.9645	26.3949	43.0043
ENSG00000076248.6	UNG	protein_coding	chr12	109535379	109548797	+	8	5	2567	15.2128	15.4356	18.5935	14.7517	15.0469	18.1635	62.1844	63.2479	78.8088	63.1337	64.234	79.2587
ENSG00000076258.5	FMO4	protein_coding	chr1	171283347	171311223	+	10	5	2517	1.18994	1.02086	1.24148	1.00904	0.861488	1.05376	1.11793	1.04022	1.48331	1.1362	1.03458	1.23786
ENSG00000076344.11	RGS11	protein_coding	chr16	318300	325980	-	12	10	4798	55.9411	53.9342	106.565	51.5509	50.0799	99.788	2.68397	2.6072	4.64911	2.87414	2.82433	4.56852
ENSG00000076351.8	SLC46A1	protein_coding	chr17	26721661	26734215	-	8	11	7951	7.31653	7.25467	11.3299	6.95258	6.84487	10.033	5.11714	5.11242	8.99104	5.18183	5.1416	7.77022
ENSG00000076356.6	PLXNA2	protein_coding	chr1	208195587	208417665	-	34	6	13781	16.6127	16.8243	24.7354	16.7526	16.9759	24.4111	2.63596	2.66944	4.85693	2.48495	2.517	4.09492
ENSG00000076513.12	ANKRD13A	protein_coding	chr12	110436991	110477568	+	17	10	7350	8.89905	8.583	21.4378	9.08382	8.6365	20.6954	14.8374	14.4576	32.5109	13.9083	13.7348	34.2795
ENSG00000076604.10	TRAF4	protein_coding	chr17	27071002	27077974	+	7	16	4594	6.9358	6.32501	15.1046	5.75257	5.27498	12.654	33.7978	31.0811	78.6637	33.088	30.7191	79.3163
ENSG00000076641.4	PAG1	protein_coding	chr8	81880045	82024303	-	9	4	11023	7.24844	7.22624	12.2954	7.37922	7.33674	12.4632	1.83747	1.82582	2.4805	1.70175	1.68118	2.22931
ENSG00000076650.2	GPATCH1	protein_coding	chr19	33571786	33621448	+	21	4	4488	4.75361	4.68725	7.24095	5.06252	4.99075	7.58576	6.71023	6.65886	9.93223	7.29555	7.21616	10.9164
ENSG00000076662.5	ICAM3	protein_coding	chr19	10444452	10450499	-	4	10	2950	1.17929	1.21292	2.57202	0.961768	0.993514	1.84775	20.1853	20.7899	32.9835	22.8226	23.4822	37.7518
ENSG00000076706.10	MCAM	protein_coding	chr11	119179241	119192231	-	20	18	7420	31.5157	30.1568	73.1851	30.1644	29.0595	67.7175	21.5507	20.687	48.2158	22.2237	21.1694	50.4473
ENSG00000076716.7	GPC4	protein_coding	chrX	132434131	132549518	-	10	2	5057	3.31213	3.33833	5.32729	3.37081	3.36902	4.87957	7.72975	7.89693	12.3202	6.87725	7.00915	10.7693
ENSG00000076770.10	MBNL3	protein_coding	chrX	131503345	131623996	-	14	12	12199	0.309731	0.312997	0.339008	0.345115	0.353545	0.38775	8.18324	8.20137	14.3322	7.35078	7.2619	13.7501
ENSG00000076826.5	CAMSAP3	protein_coding	chr19	7660788	7683190	+	19	4	4845	14.7365	14.6563	20.3783	14.3896	14.3707	20.5345	6.33613	6.3265	9.22403	7.45829	7.4463	10.6678
ENSG00000076864.15	RAP1GAP	protein_coding	chr1	21922708	21995801	-	32	14	5650	90.0482	89.443	146.702	84.7358	83.5715	137.944	8.82082	8.69236	15.6809	8.94362	8.69877	15.1476
ENSG00000076924.7	XAB2	protein_coding	chr19	7684411	7694451	-	12	5	4673	19.9281	20.2524	35.337	19.3799	19.6877	35.0067	22.8707	23.1247	41.9136	24.4069	24.7517	44.0498
ENSG00000076928.13	ARHGEF1	protein_coding	chr19	42387228	42434302	+	34	23	8630	9.76292	9.28008	30.9605	9.42274	9.15576	32.3953	21.1845	20.6151	71.6165	22.0677	21.4267	70.5224
ENSG00000076984.13	MAP2K7	protein_coding	chr19	7968728	7979363	+	10	9	5145	17.6611	17.1249	28.965	17.6509	17.1915	28.7651	16.8604	16.2279	27.5468	17.5373	16.9775	29.0288
ENSG00000077009.9	NMRK2	protein_coding	chr19	3933101	3942414	+	8	4	1141	0.141344	0.126279	0.127962	0.541438	0.480323	0.607509	7.66492	7.39399	7.73504	9.23973	8.61934	9.31964
ENSG00000077063.6	CTTNBP2	protein_coding	chr7	117350705	117514193	-	29	12	7035	9.55951	9.39742	16.1191	10.2842	9.98175	17.3445	2.63047	2.50371	4.03589	2.80425	2.76718	4.65221
ENSG00000077080.5	ACTL6B	protein_coding	chr7	100240720	100254084	-	13	6	2389	38.2474	35.403	57.8572	34.7091	31.977	52.3488	0.0212221	0.0221405	0.0925381	0.0202894	0.0211653	0.0612424
ENSG00000077147.10	TM9SF3	protein_coding	chr10	98277866	98347209	-	17	6	7095	23.3346	23.2526	27.5656	27.6633	27.4419	32.1923	32.1562	31.6803	44.8388	28.8335	28.4782	38.0975
ENSG00000077150.13	NFKB2	protein_coding	chr10	104153867	104162281	+	23	9	4479	2.96797	2.78261	4.31513	2.84541	2.72915	4.14175	20.7201	19.81	35.3642	21.9847	20.6929	36.3523
ENSG00000077152.5	UBE2T	protein_coding	chr1	202300785	202311108	-	6	3	1065	11.9847	11.8605	13.7636	11.4082	11.2988	13.0822	91.4496	91.5334	106.476	82.1511	81.4007	94.789
ENSG00000077235.13	GTF3C1	protein_coding	chr16	27470876	27561234	-	39	13	11562	17.2723	17.5111	56.1209	16.8608	16.9592	52.7778	23.4028	23.8712	56.9794	23.6027	23.9918	52.6642
ENSG00000077238.9	IL4R	protein_coding	chr16	27324989	27376099	+	20	20	6091	4.70919	4.5576	8.97305	4.91724	4.71008	10.1633	12.6811	12.6221	23.8055	12.1318	12.0951	22.9536
ENSG00000077254.10	USP33	protein_coding	chr1	78161672	78225537	-	27	18	6918	24.278	23.5629	44.1565	28.0073	27.3931	51.005	15.6063	15.0699	31.6301	14.7488	14.3257	30.4322
ENSG00000077274.7	CAPN6	protein_coding	chrX	110488331	110513751	-	13	2	3568	0.0258286	0.0269217	0.0269217	0.0513022	0.0467481	0.0467481	1.54173	1.60104	1.60104	1.52152	1.57303	1.57303
ENSG00000077279.12	DCX	protein_coding	chrX	110537007	110655603	-	9	8	10139	1.28614	1.28846	1.47463	1.14415	1.17978	1.31897	0.045004	0.0469517	0.0524913	0.0788814	0.079793	0.0892074
ENSG00000077312.4	SNRPA	protein_coding	chr19	41256542	41271294	+	8	11	2361	22.6	22.9868	35.5969	22.4737	22.8391	36.8838	84.3919	85.423	136.167	83.6907	84.5194	134.242
ENSG00000077348.4	EXOSC5	protein_coding	chr19	41892279	41903384	-	7	5	1488	13.9969	14.0082	18.6442	12.3169	12.3304	16.5983	30.9547	30.6236	41.208	36.1907	36.2238	48.8995
ENSG00000077380.11	DYNC1I2	protein_coding	chr2	172543919	172604930	+	22	28	4695	44.8072	44.857	96.746	44.0412	44.0479	94.1186	32.1691	32.3784	75.03	31.158	31.1945	67.7105
ENSG00000077458.8	FAM76B	protein_coding	chr11	95502106	95523573	-	10	13	6042	3.45853	3.31078	11.8229	3.79831	3.68347	11.2405	5.14799	4.95058	20.2047	5.45925	5.24301	24.1035
ENSG00000077463.10	SIRT6	protein_coding	chr19	4174106	4182601	-	6	16	2787	10.2837	10.3742	19.5568	9.72043	9.64413	18.8106	12.3975	12.1369	24.0051	14.5397	14.3509	29.9137
ENSG00000077498.8	TYR	protein_coding	chr11	88910620	89028927	+	7	3	3016	0.00763896	0.00796224	0.0166073	0.00758646	0.00790059	0.0449588	42.6138	43.248	58.2168	40.5161	40.9909	55.5289
ENSG00000077522.8	ACTN2	protein_coding	chr1	236849754	236927931	+	23	7	5419	17.6439	16.5116	46.4533	17.6409	17.0785	44.182	0.327456	0.307465	0.671873	0.478542	0.424553	0.871133
ENSG00000077549.13	CAPZB	protein_coding	chr1	19665267	19812066	-	16	11	3476	74.3402	74.2669	171.113	67.4706	67.159	153.829	82.8097	83.7611	191.7	85.3828	86.6393	203.877
ENSG00000077585.9	GPR137B	protein_coding	chr1	236305832	236385165	+	8	5	2279	20.6028	19.9152	24.9263	21.917	21.5384	26.3362	9.16551	8.599	10.3669	9.67727	9.18536	11.4624
ENSG00000077616.6	NAALAD2	protein_coding	chr11	89864683	89926062	+	20	10	7254	1.63567	1.55923	3.9067	1.99663	1.89535	4.75441	0.992464	0.973437	2.18607	0.785138	0.756297	1.76618
ENSG00000077684.11	PHF17	protein_coding	chr4	129730779	129796379	+	16	12	9110	7.64261	7.74462	16.9673	7.90906	8.02207	17.4102	11.0554	11.139	24.4242	10.5695	10.69	24.2287
ENSG00000077721.11	UBE2A	protein_coding	chrX	118708501	118718381	+	6	4	3251	18.5603	18.3485	35.4185	20.0515	20.0681	38.1175	37.1318	36.7946	71.721	36.2082	36.0526	71.5747
ENSG00000077809.8	GTF2I	protein_coding	chr7	74071994	74175026	+	36	21	10442	16.1287	15.8247	67.9117	16.1647	16.0125	67.0217	22.9464	23.0758	159.003	22.5391	22.5775	149.63
ENSG00000077935.12	SMC1B	protein_coding	chr22	45739944	45809500	-	25	2	4253	0.0270857	0.028232	0.0330227	0.0268996	0.0280134	0.032767	0.733135	0.684024	0.749483	0.495769	0.433948	0.466701
ENSG00000077942.13	FBLN1	protein_coding	chr22	45898118	45997015	+	26	19	7136	6.20855	6.27948	18.3586	6.24925	6.38112	18.8739	18.2983	18.7048	57.5148	18.2889	18.7878	59.2257
ENSG00000077943.7	ITGA8	protein_coding	chr10	15555948	15762124	-	31	3	7528	1.42311	1.4004	1.63622	1.86924	1.83269	2.45901	0.481538	0.47076	0.551829	0.592371	0.574284	0.874367
ENSG00000077984.4	CST7	protein_coding	chr20	24929866	24940564	+	4	2	930	0.817516	0.852114	0.85395	0.713487	0.743029	0.744631	41.2411	42.2865	42.3777	45.2139	46.5949	46.6953
ENSG00000078018.15	MAP2	protein_coding	chr2	210288782	210598842	+	24	16	11559	110.223	109.134	185.921	117.104	116.591	199.018	0.530724	0.530813	1.80378	0.48853	0.476811	1.40439
ENSG00000078061.8	ARAF	protein_coding	chrX	47420516	47431307	+	16	6	3497	12.4057	11.6809	22.0214	11.8886	11.2225	20.2312	32.3885	31.287	53.0231	36.4055	35.266	59.7444
ENSG00000078070.7	MCCC1	protein_coding	chr3	182733006	182833863	-	23	14	4321	13.0578	12.3989	26.3245	11.9673	11.2992	24.3642	13.8511	13.6978	26.0355	13.1302	13.0359	24.0899
ENSG00000078081.3	LAMP3	protein_coding	chr3	182840001	182881627	-	10	5	3816	0.0181125	0.018879	0.0213459	0.023984	0.0249771	0.0655972	2.04605	2.07222	2.85018	1.791	1.76894	2.4442
ENSG00000078098.9	FAP	protein_coding	chr2	163027194	163101661	-	31	13	7003	0.352018	0.346341	1.52133	0.379005	0.309634	1.02055	1.8244	1.83538	6.43237	1.63694	1.61374	4.69642
ENSG00000078142.7	PIK3C3	protein_coding	chr18	39535171	39667794	+	28	17	15176	6.60992	6.6618	15.6194	7.43746	7.43924	22.2908	5.01784	4.9858	48.3696	4.52104	4.5113	45.5692
ENSG00000078237.4	C12orf5	protein_coding	chr12	4430371	4462338	+	8	3	1602	7.73722	7.77985	9.15748	7.46982	7.48163	8.80645	16.6308	16.6572	19.6068	13.6307	13.4774	15.8639
ENSG00000078295.11	ADCY2	protein_coding	chr5	7396321	7830194	+	31	9	17784	12.3551	12.4905	50.273	11.9036	11.9998	48.5456	0.306466	0.307833	2.05957	0.358412	0.355403	1.53182
ENSG00000078369.13	GNB1	protein_coding	chr1	1716729	1822495	-	15	8	6351	173.51	174.746	360.532	171.579	172.545	353.808	95.36	96.1556	224.284	94.699	95.8771	218.236
ENSG00000078401.6	EDN1	protein_coding	chr6	12290596	12297427	+	5	1	2033	13.2818	12.3791	12.3791	13.0329	12.9865	12.9865	13.2547	12.6836	12.6836	10.6814	9.97349	9.97349
ENSG00000078403.12	MLLT10	protein_coding	chr10	21823094	22032559	+	30	16	6844	7.4867	7.26669	11.6893	7.86652	7.65955	13.8756	10.4488	10.2557	18.4038	9.97191	9.75593	18.1776
ENSG00000078487.13	ZCWPW1	protein_coding	chr7	99998449	100026615	-	18	9	3318	4.23564	3.48849	8.97124	4.05482	3.38248	8.9391	3.19355	2.77381	4.73946	3.03129	2.484	4.53207
ENSG00000078549.10	ADCYAP1R1	protein_coding	chr7	31092076	31151089	+	19	6	6828	32.551	33.1267	37.1244	33.021	33.5646	37.7847	0.315573	0.325357	0.375406	0.440133	0.459133	0.517799
ENSG00000078596.6	ITM2A	protein_coding	chrX	78615881	78623164	-	7	6	2051	45.7412	44.7616	80.8983	42.2251	41.6616	80.0319	53.4187	52.6358	100.787	51.8391	50.4899	99.1098
ENSG00000078668.9	VDAC3	protein_coding	chr8	42249142	42263415	+	11	13	3144	84.7845	84.0418	225.716	85.5773	83.8988	224.625	67.3494	67.4126	165.47	64.829	64.4351	158.813
ENSG00000078674.13	PCM1	protein_coding	chr8	17780349	17885478	+	44	23	12470	16.4137	16.1474	60.8386	17.1468	16.8192	66.3422	22.1785	22.2879	71.8796	20.3856	20.5195	68.1124
ENSG00000078699.17	CBFA2T2	protein_coding	chr20	32077881	32237842	+	18	11	9457	10.2393	10.1927	13.887	10.002	9.96767	13.8614	7.96385	7.89183	12.652	8.34424	8.28206	12.8388
ENSG00000078725.8	BRINP1	protein_coding	chr9	121915736	122131745	-	9	3	3905	41.6828	43.0778	53.2687	40.3885	41.6886	51.2277	1.46061	1.51028	1.95579	1.3716	1.40491	1.71336
ENSG00000078804.8	TP53INP2	protein_coding	chr20	33292094	33301243	+	6	4	4228	124.96	128.477	131.954	120.714	123.959	128.598	25.8354	26.4093	27.4589	25.4051	25.9875	27.1397
ENSG00000078808.12	SDF4	protein_coding	chr1	1152288	1167411	-	7	8	4709	44.4049	43.4692	100.587	42.0153	41.0428	96.8153	63.1564	63.3343	168.475	69.4287	69.7307	176.424
ENSG00000078898.6	BPIFB2	protein_coding	chr20	31595406	31611515	+	16	1	1898	0.0849703	0.0885663	0.0885663	0.0241104	0.0251087	0.0251087	56.3759	51.0265	51.0265	58.7505	53.2412	53.2412
ENSG00000078900.10	TP73	protein_coding	chr1	3569084	3652765	+	16	14	6763	1.93156	1.90678	2.91161	1.76943	1.76166	2.36817	2.45889	2.46363	3.41946	2.57301	2.57567	3.94562
ENSG00000078902.11	TOLLIP	protein_coding	chr11	1295601	1330884	-	12	14	5983	77.4965	79.0784	137.401	73.6407	75.2601	129.986	10.5628	10.653	22.1805	10.5482	10.7627	23.9608
ENSG00000078967.8	UBE2D4	protein_coding	chr7	43966037	43995735	+	9	12	4713	11.9033	12.086	28.6347	12.1953	12.2604	28.3012	6.92237	7.09851	18.0443	7.47178	7.49392	18.5406
ENSG00000079102.12	RUNX1T1	protein_coding	chr8	92967203	93115514	-	23	47	13527	5.62565	5.4998	13.8982	5.79842	5.70382	13.4456	0.0843306	0.0879802	0.527483	0.041208	0.0429869	0.24055
ENSG00000079134.7	THOC1	protein_coding	chr18	214520	268050	-	18	18	8099	5.95961	5.53282	25.3009	5.6305	5.30169	24.9167	9.81564	9.27387	41.3168	9.23764	8.76548	39.695
ENSG00000079150.13	FKBP7	protein_coding	chr2	179328391	179343327	-	6	8	3080	1.52597	1.52037	4.19704	1.73834	1.54728	3.32564	5.41563	5.37524	17.6195	5.12255	5.02355	15.053
ENSG00000079156.12	OSBPL6	protein_coding	chr2	179059208	179264160	+	29	9	8028	6.90484	6.88895	9.91296	6.95715	6.90982	9.44786	2.8419	2.79688	5.4317	2.59021	2.63275	4.94552
ENSG00000079215.9	SLC1A3	protein_coding	chr5	36606457	36688436	+	16	14	6265	209.231	211.773	405.858	218.64	220.547	412.167	4.46706	4.49153	10.5538	4.22046	4.22509	9.24876
ENSG00000079246.11	XRCC5	protein_coding	chr2	216972187	217071026	+	24	10	5463	58.6668	59.8045	96.6397	61.8405	62.9137	103.678	147.505	150.785	246.292	137.997	141.441	229.005
ENSG00000079257.3	LXN	protein_coding	chr3	158363611	158390482	-	7	2	1504	3.76836	3.76817	5.07825	4.07716	3.8499	5.18839	10.1129	10.3044	13.887	9.36233	9.4471	12.7468
ENSG00000079332.10	SAR1A	protein_coding	chr10	71907045	71930279	-	11	9	6914	19.9701	20.2804	42.6153	22.4108	22.5461	47.5108	22.8053	23.0043	63.6216	21.0949	21.2011	56.8389
ENSG00000079337.11	RAPGEF3	protein_coding	chr12	48128455	48164823	-	27	21	11995	8.86991	8.60664	33.512	8.74028	8.45458	33.3036	0.634008	0.590893	1.93398	0.642514	0.594373	2.25088
ENSG00000079393.16	DUSP13	protein_coding	chr10	76854192	76868979	-	9	15	2349	0.0588483	0.0613387	0.130079	0.0292219	0.0304319	0.0915295	1.13313	0.956996	1.96714	1.41349	1.33459	2.24143
ENSG00000079432.3	CIC	protein_coding	chr19	42772689	42799949	+	24	9	9494	37.6503	38.0143	80.1432	35.6756	36.0234	73.835	18.2847	18.3044	38.4926	19.6535	19.6125	39.4077
ENSG00000079459.8	FDFT1	protein_coding	chr8	11653082	11696818	+	12	22	5202	39.6917	40.1297	120.88	40.4658	41.1244	122.016	85.5079	87.058	277.278	83.3667	84.866	275.995
ENSG00000079462.3	PAFAH1B3	protein_coding	chr19	42801185	42807698	-	5	8	1419	28.6893	28.9049	41.7028	29.3306	28.5468	43.0788	37.9979	37.909	54.9399	41.7934	41.6199	60.4256
ENSG00000079616.8	KIF22	protein_coding	chr16	29802040	29816706	+	10	11	4312	8.23359	8.19777	21.8592	8.74479	8.70347	22.9175	58.1422	57.9844	127.827	58.5771	58.4732	129.266
ENSG00000079689.9	SCGN	protein_coding	chr6	25652464	25702011	+	11	2	1447	26.0643	24.9601	25.0547	27.7827	26.6935	26.6935	0.385415	0.292432	0.292432	0.234485	0.157248	0.225475
ENSG00000079785.10	DDX1	protein_coding	chr2	15731302	15771235	+	26	6	3817	57.0877	56.8613	82.8388	56.7793	56.0215	83.1817	77.5569	77.5668	111.025	71.0245	70.8649	101.26
ENSG00000079819.12	EPB41L2	protein_coding	chr6	131160487	131384462	-	33	31	10247	21.3191	21.141	74.9781	22.0859	21.9167	76.3444	15.0016	15.003	42.8708	13.7841	13.8487	42.1813
ENSG00000079841.14	RIMS1	protein_coding	chr6	72596406	73112845	+	41	22	12800	21.0214	20.8304	59.3786	22.2176	22.1397	63.2729	0.0475308	0.0454555	0.136282	0.032188	0.0335776	0.111428
ENSG00000079931.10	MOXD1	protein_coding	chr6	132617194	132722684	-	14	4	5293	4.52251	4.56872	7.90527	3.70899	3.72751	6.81621	9.08051	9.3236	16.1938	9.80326	9.96374	17.6616
ENSG00000079950.9	STX7	protein_coding	chr6	132767006	132834337	-	11	4	16387	8.17693	8.28412	40.2015	9.79069	9.8471	43.8324	4.01432	4.02505	28.8153	3.79353	3.81535	28.1077
ENSG00000079974.13	RABL2B	protein_coding	chr22	51205929	51222091	-	11	15	5870	9.51393	9.18427	25.6325	10.1502	9.53533	27.2776	5.03541	4.59554	12.0931	4.83063	4.42757	11.833
ENSG00000080007.6	DDX43	protein_coding	chr6	74104471	74127292	+	18	4	2807	0.287271	0.273763	0.342885	0.36681	0.381998	0.547125	1.38173	1.26251	1.41022	1.25193	1.11684	1.2475
ENSG00000080031.5	PTPRH	protein_coding	chr19	55692616	55720874	-	21	7	4344	2.45029	2.36603	3.40112	2.17536	2.07893	2.79145	9.86797	9.41226	12.7837	9.66862	9.3585	12.8703
ENSG00000080189.10	SLC35C2	protein_coding	chr20	44978167	44993043	-	11	14	4106	15.9579	15.3115	33.6369	14.5164	13.4868	29.2802	27.9366	26.6014	60.237	28.9577	27.6648	61.1371
ENSG00000080200.5	CRYBG3	protein_coding	chr3	97595819	97663810	+	22	4	5003	4.79386	4.74714	6.92248	5.73048	5.64389	7.60387	6.04483	5.89411	7.55498	5.69682	5.43235	7.03514
ENSG00000080224.13	EPHA6	protein_coding	chr3	96533425	97471304	+	34	11	6303	1.32686	1.26109	2.90257	1.25603	1.17194	2.91545	0.17294	0.180424	0.605273	0.203791	0.192533	0.548769
ENSG00000080345.13	RIF1	protein_coding	chr2	152266397	152364527	+	45	14	18166	5.66909	5.52565	8.99636	6.0483	5.9131	9.28163	9.45837	9.20384	20.0763	8.47569	8.35448	17.661
ENSG00000080371.4	RAB21	protein_coding	chr12	72148654	72184699	+	7	4	6670	10.9462	11.0746	27.5162	12.8434	13.1073	29.1071	9.92327	9.95623	29.5429	9.70518	9.84744	31.0261
ENSG00000080493.9	SLC4A4	protein_coding	chr4	72053003	72437804	+	26	6	8361	19.6718	19.7834	22.6298	20.7599	20.9327	23.4843	0.84287	0.860369	1.06045	0.791334	0.810376	1.11858
ENSG00000080503.15	SMARCA2	protein_coding	chr9	2015342	2193624	+	43	17	7132	43.2031	43.6914	100.851	44.3147	44.8332	101.689	14.8857	14.9737	33.0667	13.4024	13.5059	28.0134
ENSG00000080561.9	MID2	protein_coding	chrX	107068985	107170423	+	11	4	3097	4.18081	4.20266	5.44707	4.07081	4.02394	5.31336	2.1118	2.1605	2.83749	1.99551	2.07349	2.68022
ENSG00000080573.6	COL5A3	protein_coding	chr19	10070237	10121147	-	66	2	6750	12.011	11.3382	12.8189	12.4878	11.787	13.0177	2.79411	2.68778	2.93854	2.93342	2.90649	3.23502
ENSG00000080608.9	KIAA0020	protein_coding	chr9	2720469	2844241	-	20	4	2707	3.54906	3.47748	4.28284	4.36146	4.36601	5.33018	34.9297	34.761	46.2045	32.8574	32.5013	39.7316
ENSG00000080618.9	CPB2	protein_coding	chr13	46627321	46679211	-	11	2	1767	0.0130385	0	0	0	0	0	8.83727	8.63601	8.9214	8.22944	8.18408	8.45657
ENSG00000080644.11	CHRNA3	protein_coding	chr15	78885394	78913637	-	10	8	4765	2.97357	3.00365	4.46984	3.02036	2.95039	4.54637	0.25004	0.23866	0.375242	0.350947	0.328957	0.630992
ENSG00000080709.10	KCNN2	protein_coding	chr5	113696642	113832337	+	10	6	3995	4.40597	4.19571	7.49744	4.68497	4.49723	9.0354	0.317269	0.330999	0.894825	0.570252	0.537913	0.887832
ENSG00000080802.14	CNOT4	protein_coding	chr7	135046547	135194875	-	16	12	6999	7.85087	7.77825	15.7007	8.38864	8.31041	17.8127	6.18623	6.09498	13.1439	5.86588	5.71814	12.7431
ENSG00000080823.17	MOK	protein_coding	chr14	102690837	102771537	-	20	41	10996	2.67979	2.63378	15.2295	2.6052	2.58305	17.8981	3.99519	3.97569	30.3499	3.61905	3.47408	26.5165
ENSG00000080824.14	HSP90AA1	protein_coding	chr14	102547075	102606036	-	11	11	5248	540.479	532.205	838.369	553.939	545.342	858.251	655.481	653.839	1039.58	618.149	616.372	981.255
ENSG00000080845.13	DLGAP4	protein_coding	chr20	34894258	35157040	+	20	16	8789	21.9722	21.8146	61.0807	20.9074	20.8242	58.5272	20.334	19.9954	65.6648	20.3476	20.1646	66.3494
ENSG00000080947.10	CROCCP3	pseudogene	chr1	16793931	16825752	-	15	6	6813	5.02511	4.32839	8.2916	5.44061	4.82649	9.27283	1.14973	0.865646	1.82302	1.05295	0.923998	2.02283
ENSG00000080986.8	NDC80	protein_coding	chr18	2571510	2616634	+	20	5	3600	0.0319987	0.0333529	0.0552811	0.00635577	0.00661894	0.0109706	20.1531	19.8866	34.8723	19.1866	18.6946	32.3644
ENSG00000081019.9	RSBN1	protein_coding	chr1	114304454	114355098	-	9	3	6819	7.60199	7.59267	10.0367	8.26446	8.14191	10.7722	7.01124	7.01992	12.4047	6.06337	6.16198	9.60217
ENSG00000081041.8	CXCL2	protein_coding	chr4	74962752	74965010	-	2	3	1500	1.33627	1.0246	1.39833	1.84572	1.77917	2.80271	4.25876	4.14334	5.71104	5.2026	4.97211	6.68758
ENSG00000081051.3	AFP	protein_coding	chr4	74296855	74321891	+	18	7	3259	0.282775	0.272636	0.92158	0.273811	0.263214	0.730702	263.034	266.1	612.718	248.277	251.407	580.214
ENSG00000081052.10	COL4A4	protein_coding	chr2	227867427	228028829	-	48	2	9895	0.605373	0.572747	0.685304	0.656709	0.604434	0.604434	0.812115	0.775097	0.868026	0.651511	0.61065	0.643675
ENSG00000081059.15	TCF7	protein_coding	chr5	133450402	133487556	+	12	28	10063	0.350291	0.343638	1.23605	0.284219	0.288884	1.02854	28.6246	28.7938	107.212	29.6185	29.7338	113.735
ENSG00000081087.10	OSTM1	protein_coding	chr6	108362613	108487058	-	11	7	5325	6.66295	6.63376	14.654	7.43786	7.38338	17.6586	15.8002	15.3963	34.8856	14.992	14.927	35.6971
ENSG00000081154.7	PCNP	protein_coding	chr3	101292939	101313281	+	6	8	3102	57.516	57.3645	122.254	62.4611	62.428	127.163	63.2682	62.5022	141.693	55.4484	55.1606	131.414
ENSG00000081177.14	EXD2	protein_coding	chr14	69658228	69709075	+	15	14	4601	16.1439	16.0912	25.2491	16.4258	16.4482	26.1807	9.28922	9.28888	14.2678	9.52362	9.60504	14.6655
ENSG00000081181.3	ARG2	protein_coding	chr14	68086515	68118437	+	8	4	2418	14.4447	14.5495	18.4451	12.8976	13.0474	18.3341	15.841	16.1547	20.2342	15.3854	15.7359	19.7085
ENSG00000081189.9	MEF2C	protein_coding	chr5	88013975	88199922	-	22	25	9053	41.0138	41.1553	84.8473	45.7691	45.8139	86.7916	3.25098	3.23976	8.39575	3.03582	2.98814	8.94825
ENSG00000081237.14	PTPRC	protein_coding	chr1	198607801	198726545	+	35	18	8507	1.42454	1.42272	2.9381	1.73482	1.76183	3.61871	7.24407	7.16897	14.2803	6.37302	6.26773	12.6096
ENSG00000081277.7	PKP1	protein_coding	chr1	201252580	201302121	+	16	5	6211	0.534154	0.556759	0.642279	0.582058	0.579304	0.668287	1.84889	1.89058	2.60353	1.75203	1.77881	2.16475
ENSG00000081307.8	UBA5	protein_coding	chr3	132373290	132396941	+	11	14	6827	10.6404	10.3626	28.6346	11.5393	11.3713	33.0887	13.5456	13.0394	42.3205	13.0781	12.6724	43.307
ENSG00000081320.6	STK17B	protein_coding	chr2	196998290	197041227	-	13	5	6580	1.96428	1.95252	2.43003	1.95773	1.93015	2.4022	7.77059	7.72103	11.8756	6.45303	6.38964	10.5705
ENSG00000081377.12	CDC14B	protein_coding	chr9	99252523	99382112	-	21	15	10457	5.10046	4.88687	11.6806	4.78752	4.53458	10.7373	5.09807	4.99498	10.9454	4.6075	4.60573	10.0137
ENSG00000081386.8	ZNF510	protein_coding	chr9	99518147	99540411	-	6	4	5921	8.44365	8.50491	11.2493	9.00778	9.03467	11.048	5.1376	5.08301	6.3463	4.6212	4.67551	6.39969
ENSG00000081479.8	LRP2	protein_coding	chr2	169983619	170219195	-	80	5	16260	4.80335	4.85008	12.4721	4.88573	4.90339	11.7167	0.397552	0.387106	1.04736	0.394985	0.382494	1.08635
ENSG00000081692.8	JMJD4	protein_coding	chr1	227918126	227923112	-	4	5	4315	4.68257	4.68039	8.5196	4.32163	4.29073	7.62535	9.49955	9.4939	17.1773	9.64935	9.80224	17.7991
ENSG00000081721.7	DUSP12	protein_coding	chr1	161719548	161727028	+	7	5	1762	12.3695	11.5846	21.4621	12.9987	12.5091	21.8402	21.0912	20.4881	33.5748	20.8108	20.5469	32.2359
ENSG00000081760.12	AACS	protein_coding	chr12	125549925	125627873	+	22	14	16089	5.97708	5.99868	29.6904	5.55487	5.62789	27.7411	4.32186	4.33466	21.1675	4.56124	4.502	21.774
ENSG00000081791.4	KIAA0141	protein_coding	chr5	141303373	141321612	+	13	7	6047	20.776	19.7013	52.5724	19.0478	18.0908	48.163	19.1412	18.6269	61.4921	19.4823	18.6134	56.0954
ENSG00000081818.1	PCDHB4	protein_coding	chr5	140501581	140505201	+	1	1	3621	6.56624	6.41305	6.41305	6.99503	6.60687	6.60687	0.504055	0.496655	0.496655	0.595686	0.58649	0.58649
ENSG00000081870.7	HSPB11	protein_coding	chr1	54382247	54411602	-	7	6	3236	6.08016	5.40985	19.5386	5.98181	5.21333	18.907	13.5288	12.4143	44.6231	13.3311	12.2738	44.1629
ENSG00000081923.6	ATP8B1	protein_coding	chr18	55313658	55470333	-	30	6	6652	0.8347	0.754502	0.854635	0.718894	0.702093	0.884975	5.28946	5.32754	6.02051	5.7456	5.76939	7.13589
ENSG00000081985.6	IL12RB2	protein_coding	chr1	67773047	67862583	+	17	6	4233	1.3117	1.23106	1.52041	1.55674	1.46921	1.74344	0.239544	0.249911	0.438765	0.257644	0.250848	0.34806
ENSG00000082014.12	SMARCD3	protein_coding	chr7	150935850	150974982	-	13	15	5198	37.9804	38.2064	112.434	36.9711	37.2321	110.901	5.41816	5.15403	17.0802	6.03795	5.77331	18.3636
ENSG00000082068.4	WDR70	protein_coding	chr5	37379314	37753537	+	18	7	7039	5.11907	4.96044	15.9288	4.8271	4.54289	14.502	10.3538	10.2083	39.0357	10.491	10.1968	35.1509
ENSG00000082153.13	BZW1	protein_coding	chr2	201675317	201688569	+	16	13	4593	19.8839	19.8575	45.7201	21.8745	21.7167	45.2602	71.2862	70.7092	197.888	67.7945	67.2093	190.494
ENSG00000082175.10	PGR	protein_coding	chr11	100900355	101001255	-	8	8	15305	0.215262	0.218096	0.382241	0.213783	0.222635	0.475018	0.804965	0.810426	1.19301	0.771172	0.778032	1.14671
ENSG00000082212.7	ME2	protein_coding	chr18	48405419	48474691	+	16	5	3427	15.3885	15.339	26.4838	16.4045	16.298	26.3715	30.1209	29.7421	44.9669	27.5878	27.5468	41.4959
ENSG00000082213.13	C5orf22	protein_coding	chr5	31532373	31555165	+	11	11	4172	9.39898	9.4629	13.2861	9.19728	9.3268	14.9523	15.1722	15.3344	26.321	14.9818	14.9619	24.7741
ENSG00000082258.8	CCNT2	protein_coding	chr2	135675805	135716912	+	10	11	9081	8.95331	9.00166	19.9488	9.50153	9.42002	18.321	9.03335	8.91173	19.4777	8.24937	8.31873	19.2141
ENSG00000082293.8	COL19A1	protein_coding	chr6	70576463	70919679	+	56	6	8333	1.79712	1.68009	2.38964	1.97698	1.88441	3.00405	0.182526	0.145992	0.443562	0.113428	0.0970865	0.297459
ENSG00000082482.9	KCNK2	protein_coding	chr1	215179118	215410436	+	11	9	3910	3.04045	2.95417	4.29033	2.844	2.8216	3.58425	4.5837	4.70768	7.95872	4.88433	4.93353	7.46761
ENSG00000082497.7	SERTAD4	protein_coding	chr1	210406144	210419976	+	6	4	5467	2.90781	2.88152	3.45907	2.93386	2.95945	3.10008	2.73112	2.59292	3.71365	2.36727	2.3816	4.22943
ENSG00000082512.10	TRAF5	protein_coding	chr1	211499957	211548288	+	11	8	9022	1.34578	1.33086	3.20134	1.51152	1.5028	3.56174	6.80246	6.70112	19.6653	6.4847	6.31908	18.0243
ENSG00000082515.12	MRPL22	protein_coding	chr5	154320630	154348971	+	6	7	5267	5.45467	5.3846	30.9896	5.3694	5.18456	31.557	10.2804	10.1529	63.3872	9.58477	9.49452	57.9124
ENSG00000082516.8	GEMIN5	protein_coding	chr5	154266976	154317769	-	28	3	5637	6.0285	5.8917	6.52991	6.00737	6.05744	6.48998	16.4142	16.5944	17.4068	16.0325	16.1953	16.9155
ENSG00000082556.6	OPRK1	protein_coding	chr8	54138284	54164257	-	6	4	5730	1.47965	1.45845	1.66672	1.72105	1.77152	2.02449	0.221202	0.230775	0.398078	0.126889	0.132366	0.151268
ENSG00000082641.11	NFE2L1	protein_coding	chr17	46125691	46138849	+	16	23	5825	81.1569	81.6026	108.902	79.6879	79.9522	105.825	102.296	103.063	143.71	104.266	105.251	153.54
ENSG00000082701.10	GSK3B	protein_coding	chr3	119540170	119813264	-	12	4	8006	22.8549	22.9823	26.9774	24.7584	24.849	28.9149	17.9563	18.1587	33.043	17.2005	17.2546	31.8033
ENSG00000082898.12	XPO1	protein_coding	chr2	61704984	61765761	-	26	24	11708	15.7543	15.5924	50.2194	17.9579	17.8589	53.4277	44.0222	43.7611	129.294	41.7729	41.4254	124.287
ENSG00000082996.15	RNF13	protein_coding	chr3	149530495	149679926	+	14	16	3635	33.6745	32.9327	69.7516	35.4573	34.9065	82.7493	16.4372	16.2319	35.1969	15.4348	15.0161	29.5071
ENSG00000083093.5	PALB2	protein_coding	chr16	23614488	23652631	-	15	6	4740	3.52877	3.49573	4.30245	3.56245	3.54406	4.22933	12.8086	12.7659	15.3114	12.6087	12.6623	16.2092
ENSG00000083099.6	LYRM2	protein_coding	chr6	90277863	90348472	-	10	10	8679	6.08695	5.88801	14.0339	7.04429	6.92415	17.5132	7.71972	7.59978	32.7531	6.85827	6.70573	27.1635
ENSG00000083123.10	BCKDHB	protein_coding	chr6	80816364	81055987	+	14	7	4102	7.21727	7.09535	8.64832	7.40753	7.09269	9.13943	7.45291	7.31769	14.1273	7.6453	7.59321	13.8377
ENSG00000083223.13	ZCCHC6	protein_coding	chr9	88902648	88969369	-	29	8	6707	3.94004	3.77738	5.71721	3.78333	3.773	5.67183	8.71575	8.36347	10.5712	8.44474	8.18732	11.8163
ENSG00000083290.15	ULK2	protein_coding	chr17	19674142	19771249	-	32	11	9843	13.8099	13.6819	29.9877	13.4081	13.3412	27.5897	3.05959	3.05766	9.0384	2.9005	2.83564	6.37543
ENSG00000083307.6	GRHL2	protein_coding	chr8	102504660	102681954	+	16	6	6060	0.0190092	0.0198136	0.0229186	0.0188785	0.0117961	0.0136447	4.47595	4.55183	6.79694	4.55919	4.53489	5.52631
ENSG00000083444.12	PLOD1	protein_coding	chr1	11994262	12035595	+	22	10	5320	15.2049	15.3338	29.0108	14.8682	15.1479	29.4683	105.73	107.706	204.232	110.209	111.887	214.929
ENSG00000083457.7	ITGAE	protein_coding	chr17	3617922	3704537	-	34	9	6657	2.9729	2.80291	26.6306	3.02121	2.82058	26.6328	3.55285	3.30933	30.4329	3.82267	3.47878	31.9611
ENSG00000083520.10	DIS3	protein_coding	chr13	73329540	73356234	-	22	6	7602	8.89499	8.79128	14.8695	9.12582	8.98337	15.3255	16.353	16.424	32.1511	14.9106	15.0388	29.6257
ENSG00000083544.9	TDRD3	protein_coding	chr13	60970591	61148012	+	17	8	4112	6.3985	5.98601	10.6323	7.00557	6.65242	12.2927	12.2064	11.8664	20.5805	11.1748	10.8088	19.072
ENSG00000083642.14	PDS5B	protein_coding	chr13	33160564	33352157	+	35	9	13212	6.59854	6.46702	22.0238	7.03464	6.83716	22.5216	6.39884	6.2474	22.483	5.5985	5.42685	19.4831
ENSG00000083720.8	OXCT1	protein_coding	chr5	41730167	41870621	-	20	8	4194	56.3617	57.4186	71.2715	57.9985	59.0534	73.8825	34.3558	34.2851	49.4719	31.4995	31.8345	43.3864
ENSG00000083750.8	RRAGB	protein_coding	chrX	55744172	55785207	+	11	6	2725	17.6027	16.6204	28.2088	17.1039	16.3693	25.7278	7.48865	6.60929	10.2552	7.7999	6.69855	12.0858
ENSG00000083812.7	ZNF324	protein_coding	chr19	58978423	58984945	+	4	4	3795	4.84458	4.77751	5.82747	4.49175	4.43286	5.39522	3.75404	3.67259	4.49541	4.10634	4.11706	5.04517
ENSG00000083814.8	ZNF671	protein_coding	chr19	58231119	58238992	-	3	7	3532	8.46028	8.61435	12.6082	8.09119	8.11588	12.1867	2.47612	2.50092	3.44702	3.09465	3.08508	4.49387
ENSG00000083817.8	ZNF416	protein_coding	chr19	58082934	58090295	-	4	1	2561	3.53548	3.60071	3.60071	3.59159	3.62866	3.62866	3.71189	3.83123	3.83123	3.1513	3.17875	3.17875
ENSG00000083838.11	ZNF446	protein_coding	chr19	58985384	58992597	+	4	7	4923	7.5159	7.17058	15.0001	6.35345	6.1083	11.3546	4.25843	4.12577	9.37797	4.31743	4.16487	8.26279
ENSG00000083844.6	ZNF264	protein_coding	chr19	57702868	57724724	+	5	6	3042	2.46144	2.42352	3.16669	2.60248	2.53791	3.20838	3.7333	3.47756	5.3257	2.97967	2.80079	4.42361
ENSG00000083845.4	RPS5	protein_coding	chr19	58897767	58906173	+	3	9	3617	71.5314	73.2109	356.515	69.1231	70.8455	345.769	287.916	296.078	1444.41	320.297	329.175	1606.33
ENSG00000083857.9	FAT1	protein_coding	chr4	187508937	187647876	-	32	11	16168	8.26632	8.43197	31.5197	8.11894	8.26942	29.4821	23.7834	24.3891	74.0936	22.9631	23.59	67.7574
ENSG00000083896.8	YTHDC1	protein_coding	chr4	69176105	69215807	-	18	7	7032	18.9273	18.2872	49.3517	21.5695	20.7616	51.6291	20.3642	19.8464	53.2497	19.8931	19.4468	52.3027
ENSG00000083937.4	CHMP2B	protein_coding	chr3	87276421	87304698	+	7	5	3106	15.5918	15.8032	29.8719	17.4884	17.8213	29.2183	17.1637	17.1658	38.7862	16.6981	16.7352	38.4333
ENSG00000084073.4	ZMPSTE24	protein_coding	chr1	40723779	40759856	+	12	4	3572	10.8101	10.8104	12.6333	12.3372	12.4077	14.3592	21.7091	21.5677	26.1045	18.9842	19.1667	23.6384
ENSG00000084090.9	STARD7	protein_coding	chr2	96850597	96874563	-	7	6	4414	64.5763	65.2037	87.5964	66.7866	67.3278	89.6373	74.5389	75.7216	104.727	73.5582	74.305	102.984
ENSG00000084092.6	NOA1	protein_coding	chr4	57829536	57844989	-	7	1	3415	9.15492	9.19779	9.19779	10.2913	10.4174	10.4174	16.4272	16.5961	16.5961	16.2376	16.5832	16.5832
ENSG00000084093.11	REST	protein_coding	chr4	57774075	57802010	+	7	4	7875	1.14683	1.17402	1.51892	1.46437	1.49475	1.61248	8.10227	8.31859	10.0767	8.1155	8.22184	9.98378
ENSG00000084110.6	HAL	protein_coding	chr12	96366440	96390143	-	23	11	5146	0.0268625	0.0279994	0.118556	0.00889264	0	0	1.40394	1.3208	2.24203	1.48824	1.41001	2.56366
ENSG00000084207.11	GSTP1	protein_coding	chr11	67351066	67354131	+	3	9	1925	96.0222	98.015	242.951	94.5778	96.1916	237.895	211.213	215.504	538.711	221.546	227.117	565.848
ENSG00000084444.9	KIAA1467	protein_coding	chr12	13197218	13295455	+	15	6	6807	23.9462	24.5186	34.7678	23.6707	24.3183	34.7562	5.72762	5.80455	9.08435	6.06694	6.19142	8.9815
ENSG00000084453.12	SLCO1A2	protein_coding	chr12	21417534	21572528	-	21	20	11637	17.1096	17.4168	30.7565	18.679	19.0777	33.3339	0.673118	0.647706	2.33743	0.69352	0.671317	1.85456
ENSG00000084463.3	WBP11	protein_coding	chr12	14939410	14956474	-	13	5	3418	39.5938	39.7589	49.5146	40.6807	40.7407	50.7369	82.1012	82.0874	102.484	81.1449	81.4303	101.5
ENSG00000084623.7	EIF3I	protein_coding	chr1	32687529	32697205	+	11	6	1725	88.1629	84.7663	104.533	83.1932	81.5407	99.6134	241.212	235.4	284.546	247.008	241.446	291.644
ENSG00000084628.5	NKAIN1	protein_coding	chr1	31652592	31712401	-	8	7	2987	17.2851	17.4699	21.1224	15.5117	15.6754	18.6593	7.21369	7.38422	8.8428	7.90277	8.05771	9.71022
ENSG00000084636.13	COL16A1	protein_coding	chr1	32117848	32169920	-	78	18	9365	18.3895	16.8265	63.6026	17.3957	15.8032	59.0392	7.89862	7.45539	21.2058	8.5349	8.10695	23.1427
ENSG00000084652.11	TXLNA	protein_coding	chr1	32645287	32663886	+	11	2	5103	18.4295	18.4376	19.2562	18.3297	18.2949	19.0423	45.3494	45.3789	47.3812	45.7311	45.9216	47.9318
ENSG00000084674.9	APOB	protein_coding	chr2	21224301	21266945	-	30	2	14828	0.201988	0.19758	0.207473	0.111102	0.114095	0.119807	133.835	136.945	143.895	121.324	124.111	130.493
ENSG00000084731.9	KIF3C	protein_coding	chr2	26149471	26205618	-	10	7	6397	89.5597	92.1411	118.059	89.9636	92.3365	119.02	7.24392	7.44167	9.10821	6.72477	6.92417	9.8179
ENSG00000084734.4	GCKR	protein_coding	chr2	27719709	27746554	+	20	7	3149	0.85601	0.64058	1.31663	0.828329	0.522116	1.2189	2.43113	1.74689	3.37834	2.48591	1.99108	4.73282
ENSG00000084754.6	HADHA	protein_coding	chr2	26413504	26467594	-	20	5	3971	50.6616	51.6204	69.9655	51.4947	52.4148	71.3781	119.439	121.672	165.824	112.189	114.109	153.925
ENSG00000084764.6	MAPRE3	protein_coding	chr2	27193480	27250064	+	10	9	3459	109.927	110.837	210.261	107.915	109.097	209.058	8.12746	8.01281	16.289	7.83334	7.65255	15.6501
ENSG00000084774.9	CAD	protein_coding	chr2	27440258	27466811	+	43	11	8422	7.75538	7.61027	13.9203	7.2022	7.01944	15.3631	41.7961	41.6078	60.9501	43.9391	43.9057	68.3773
ENSG00000085117.7	CD82	protein_coding	chr11	44585977	44641913	+	16	14	4054	13.6336	13.7486	34.3467	12.2418	12.3667	27.9588	12.6749	12.5972	36.3026	12.9727	13.0526	36.6667
ENSG00000085185.11	BCORL1	protein_coding	chrX	129115083	129192058	+	17	8	7996	3.97047	4.00936	6.31627	3.38233	3.47469	4.83236	4.9647	5.07041	7.74968	5.83767	6.0043	9.06616
ENSG00000085224.16	ATRX	protein_coding	chrX	76760356	77041702	-	37	8	12224	12.3658	12.3744	14.0641	14.409	14.3371	16.7584	12.9134	12.6371	16.0865	11.9315	11.7682	15.8776
ENSG00000085231.9	TAF9	protein_coding	chr5	68646811	68665840	-	9	12	4050	22.9538	23.1188	87.005	24.0446	24.1282	91.6701	40.7349	41.1657	154.485	39.1302	39.3899	147.284
ENSG00000085274.11	MYNN	protein_coding	chr3	169490619	169507504	+	10	6	5730	5.09835	5.09619	10.3671	4.86766	4.87791	9.96967	5.95919	5.6263	12.6472	6.03989	5.92559	13.6483
ENSG00000085365.13	SCAMP1	protein_coding	chr5	77656339	77776562	+	12	8	6842	16.392	15.9275	31.0798	19.7139	19.3425	33.4412	7.25814	6.9538	19.9038	6.58494	6.37776	18.1682
ENSG00000085415.11	SEH1L	protein_coding	chr18	12947132	12987535	+	14	10	10481	6.03619	6.0442	28.8486	7.18231	7.18415	32.3676	9.49074	9.44981	39.4965	8.97653	8.85265	39.0892
ENSG00000085449.10	WDFY1	protein_coding	chr2	224720433	224810104	-	13	6	5516	11.5613	11.563	14.7831	12.4235	12.4973	15.4697	19.7247	20.0509	26.3045	19.1258	19.1769	25.2293
ENSG00000085465.11	OVGP1	protein_coding	chr1	111956936	111970399	-	10	4	2988	6.80841	6.09193	9.11289	5.74317	5.2792	8.03582	1.68829	1.46042	2.07174	1.93042	1.70069	2.66202
ENSG00000085491.11	SLC25A24	protein_coding	chr1	108676658	108743471	-	11	4	6548	1.13647	1.07821	2.26896	1.31386	1.27729	2.66022	12.2529	12.2581	23.2769	11.7588	11.8533	22.1021
ENSG00000085511.15	MAP3K4	protein_coding	chr6	161412759	161538417	+	30	16	7522	9.21319	8.87201	17.331	9.57573	9.2373	19.8661	11.0943	10.9416	20.1214	10.3554	10.1437	19.5317
ENSG00000085552.12	IGSF9	protein_coding	chr1	159896829	159915386	-	18	5	6620	0.125288	0.126963	0.220646	0.13134	0.12238	0.204391	2.34734	2.24119	3.67359	2.48947	2.35252	3.86163
ENSG00000085563.10	ABCB1	protein_coding	chr7	87133175	87342611	-	33	10	5552	7.88442	7.85909	17.2743	7.74369	7.77248	13.4109	1.85375	1.91968	2.40273	1.70244	1.73494	3.82306
ENSG00000085644.9	ZNF213	protein_coding	chr16	3179778	3192806	+	3	9	6443	8.08138	8.33021	16.3064	6.74029	6.90104	13.3446	3.9266	3.97339	7.44741	4.50634	4.59493	8.85169
ENSG00000085662.9	AKR1B1	protein_coding	chr7	134127102	134144036	-	8	14	3660	44.4415	44.9707	117.585	41.4917	42.3894	110.168	59.3849	60.676	157.34	61.1918	62.1065	163.518
ENSG00000085721.8	RRN3	protein_coding	chr16	15153879	15188174	-	19	7	4156	13.4432	13.4978	15.8001	14.573	14.7235	16.8776	22.2024	22.2851	27.151	21.1159	21.1392	24.9666
ENSG00000085733.11	CTTN	protein_coding	chr11	70244510	70282690	+	17	16	6949	38.2968	36.956	113.568	38.4222	37.1464	117.395	52.9941	52.4713	154.662	54.2051	53.5399	155.219
ENSG00000085741.8	WNT11	protein_coding	chr11	75897369	75921780	-	7	3	2401	1.40096	1.38024	1.83602	1.62005	1.62758	2.30234	1.19305	1.1786	1.60026	1.60495	1.58999	2.01976
ENSG00000085760.10	MTIF2	protein_coding	chr2	55463731	55496483	-	16	12	3371	10.6208	10.2368	14.3537	11.5252	11.1896	15.3123	32.5539	31.1855	43.5407	29.2611	28.3344	39.4322
ENSG00000085788.9	DDHD2	protein_coding	chr8	38082736	38133076	+	22	24	10686	20.965	20.9871	86.3788	22.9043	23.1525	76.4263	8.9647	8.81809	49.1958	8.48	8.39419	51.0305
ENSG00000085831.11	TTC39A	protein_coding	chr1	51752930	51810788	-	26	19	9362	0.976984	0.990114	4.35406	0.984934	0.928999	4.81537	2.3828	2.3927	10.7107	2.23408	2.2198	8.88317
ENSG00000085832.12	EPS15	protein_coding	chr1	51819935	51985000	-	29	10	7551	36.5251	36.4839	83.6826	39.4346	39.3823	83.1149	14.6673	14.6156	27.0054	13.1401	12.9908	25.9023
ENSG00000085840.8	ORC1	protein_coding	chr1	52838501	52870131	-	17	2	3157	0.342996	0.342298	0.342298	0.340639	0.294361	0.30172	28.4412	28.4574	28.5373	29.6555	29.6784	29.8248
ENSG00000085871.4	MGST2	protein_coding	chr4	140586922	140661899	+	9	6	3182	6.11094	6.03749	23.7425	6.0977	5.73614	22.498	13.9416	14.0213	55.8363	14.5094	14.4445	58.2025
ENSG00000085982.9	USP40	protein_coding	chr2	234384166	234475428	-	38	17	9352	4.92709	4.58096	13.239	4.881	4.65506	14.572	6.28052	6.06027	14.056	6.25329	6.06636	14.4786
ENSG00000085998.9	POMGNT1	protein_coding	chr1	46654354	46685977	-	20	12	6366	27.733	27.2809	68.61	24.4155	24.2362	60.7194	20.8739	20.2734	51.9568	21.7497	21.2748	54.011
ENSG00000085999.7	RAD54L	protein_coding	chr1	46713360	46744145	+	18	12	3212	1.06875	1.00931	1.99522	0.797835	0.778941	1.38689	24.9552	23.4086	28.7295	28.2423	26.6121	33.2412
ENSG00000086015.16	MAST2	protein_coding	chr1	46252659	46501796	+	32	10	7877	14.1709	13.9201	20.1486	14.4483	14.145	20.7592	21.3431	20.9775	32.1414	21.3897	21.1159	33.7538
ENSG00000086061.11	DNAJA1	protein_coding	chr9	33025209	33039905	+	10	4	2730	135.703	138.314	184.663	145.607	148.695	194.3	171.97	176.002	257.929	162.876	166.805	241.363
ENSG00000086062.8	B4GALT1	protein_coding	chr9	33104080	33167354	-	8	3	5065	4.19389	4.07268	5.07068	4.98272	5.03379	6.82577	48.3422	49.4005	61.5395	48.6341	49.7153	59.9544
ENSG00000086065.9	CHMP5	protein_coding	chr9	33264940	33281977	+	8	3	2237	54.4102	54.3189	82.1515	56.2558	56.6678	86.2846	43.2091	42.8683	65.7317	41.0068	40.9913	62.5111
ENSG00000086102.14	NFX1	protein_coding	chr9	33290509	33371155	+	25	6	7147	13.2232	12.6303	23.5119	12.6906	12.2258	22.9499	17.7594	17.3031	32.409	16.8195	16.2792	30.2345
ENSG00000086159.8	AQP6	protein_coding	chr12	50360977	50370922	+	7	3	5129	0.947797	0.964498	1.39343	0.624548	0.617888	0.697752	0.133446	0.139221	0.315791	0.0897794	0.069009	0.182787
ENSG00000086189.5	DIMT1	protein_coding	chr5	61683081	61699766	-	13	5	3736	4.55725	4.33231	10.6448	5.12	4.83452	12.0286	13.6791	13.3438	35.4797	12.293	12.1131	32.7469
ENSG00000086205.12	FOLH1	protein_coding	chr11	49168187	49230222	-	23	14	3824	13.0137	12.7606	21.2245	13.5047	13.2912	23.7448	0.324827	0.331969	0.533752	0.329565	0.337181	0.495645
ENSG00000086300.11	SNX10	protein_coding	chr7	26331541	26413949	+	12	8	3421	30.6088	30.6828	53.3045	35.8762	36.4562	57.3605	11.2114	11.4647	22.0697	9.486	9.58511	19.6208
ENSG00000086475.10	SEPHS1	protein_coding	chr10	13359424	13390297	-	12	7	3979	15.9172	15.8424	37.6209	16.4288	16.4384	39.3814	36.6836	36.8355	104.204	36.7403	36.6235	96.324
ENSG00000086504.11	MRPL28	protein_coding	chr16	417384	420527	-	6	10	2404	33.7824	34.1632	73.9828	33.4836	33.7995	72.9557	47.5677	48.9113	106.919	51.4353	52.7829	116.201
ENSG00000086506.2	HBQ1	protein_coding	chr16	230452	231180	+	3	1	536	4.04044	3.98742	3.98742	3.07354	3.02298	3.02298	4.68214	4.58873	4.58873	5.65198	5.75447	5.75447
ENSG00000086544.2	ITPKC	protein_coding	chr19	41223008	41246765	+	7	2	3385	9.56956	9.49923	9.78521	9.88909	10.0029	11.1925	13.3601	13.2742	13.506	13.3386	13.3244	13.3244
ENSG00000086570.8	FAT2	protein_coding	chr5	150883654	150948505	-	23	2	14537	50.3969	50.9538	79.3239	49.654	50.179	77.6417	0.0854467	0.0836868	0.0951151	0.0416793	0.0434786	0.0434876
ENSG00000086589.7	RBM22	protein_coding	chr5	150070356	150080669	-	11	9	3631	23.5277	23.4189	39.1248	23.5991	23.4869	37.9099	26.6134	26.4541	44.5415	26.5251	26.389	44.9747
ENSG00000086598.6	TMED2	protein_coding	chr12	124069078	124083116	+	5	5	3822	29.4288	29.4176	52.6138	30.801	31.1288	47.583	81.1763	82.3506	142.605	78.4141	79.0275	146.352
ENSG00000086619.9	ERO1LB	protein_coding	chr1	236378855	236445319	-	17	4	5688	4.07883	3.81237	5.22152	4.95991	4.62488	6.33467	2.60272	2.45963	3.55114	2.41164	2.24462	3.86137
ENSG00000086666.14	ZFAND6	protein_coding	chr15	80351910	80430735	+	14	21	5065	8.94727	8.84706	43.2428	8.96258	9.06082	38.7896	16.0357	15.7846	76.1543	15.1252	14.7549	70.2564
ENSG00000086696.6	HSD17B2	protein_coding	chr16	82068609	82132139	+	7	6	2688	0	0	0	0.00851219	0.00886465	0.0163768	2.82922	2.92214	6.04091	2.6057	2.68056	5.0566
ENSG00000086717.14	PPEF1	protein_coding	chrX	18694029	18846039	+	21	12	3515	2.07122	2.02224	3.21255	1.92029	1.97269	2.79637	0.122602	0.067716	0.146481	0.317167	0.258933	0.398476
ENSG00000086730.12	LAT2	protein_coding	chr7	73613982	73644161	+	16	11	4542	3.18043	3.1617	8.22379	2.60444	2.55489	6.64104	6.4686	6.44577	17.1155	6.77127	6.78526	18.4046
ENSG00000086967.9	MYBPC2	protein_coding	chr19	50936160	50969578	+	28	2	3708	0.403868	0.330291	0.340863	0.351727	0.353438	0.494565	1.40148	1.36228	1.40589	1.55558	1.54773	1.96665
ENSG00000087008.11	ACOX3	protein_coding	chr4	8368009	8442450	-	21	8	3846	4.66653	4.57055	7.61293	4.75344	4.58472	9.19748	5.40479	5.28112	10.1988	6.52209	6.35664	12.0139
ENSG00000087074.7	PPP1R15A	protein_coding	chr19	49375649	49379314	+	2	2	3093	23.2551	23.9753	31.6616	24.7524	25.5307	33.5361	54.8139	56.5106	74.3764	56.644	58.1819	76.4559
ENSG00000087076.4	HSD17B14	protein_coding	chr19	49316274	49339935	-	9	4	1281	23.7405	22.252	30.7488	20.3444	19.2709	26.2023	3.46308	3.09682	3.77903	3.93523	3.88801	4.36469
ENSG00000087077.7	TRIP6	protein_coding	chr7	100464760	100471076	+	9	8	2802	12.1362	11.3214	17.6543	10.485	9.8051	16.2929	39.1374	37.0652	60.5747	43.6623	41.1711	66.7917
ENSG00000087085.9	ACHE	protein_coding	chr7	100487615	100494594	-	8	14	3730	23.3541	22.6943	41.2677	19.8014	19.2286	35.4804	1.15535	1.12736	2.03913	1.02011	0.976031	1.62502
ENSG00000087086.9	FTL	protein_coding	chr19	49468558	49470135	+	4	1	878	1622.29	1654.38	1654.38	1568.32	1599.74	1599.74	3597.99	3697.32	3697.32	3755.73	3855.46	3855.47
ENSG00000087087.14	SRRT	protein_coding	chr7	100472733	100486285	+	22	18	4587	34.0287	31.3644	72.9351	34.0194	31.4125	71.6521	70.7273	64.1482	135.755	73.468	66.7736	148.801
ENSG00000087088.15	BAX	protein_coding	chr19	49458072	49465055	+	4	13	2587	9.17289	9.19907	30.1395	8.18118	8.08703	26.8222	32.7773	32.0899	105.28	34.5408	33.6278	106.686
ENSG00000087116.9	ADAMTS2	protein_coding	chr5	178537852	178772431	-	23	5	7687	1.16589	1.11526	3.83803	1.34243	1.27402	4.03019	1.86652	1.83721	3.88573	1.92637	1.85166	3.4399
ENSG00000087152.11	ATXN7L3	protein_coding	chr17	42269173	42277481	-	13	12	5301	60.5119	59.571	104.726	57.7091	56.1655	100.868	27.0522	26.1725	43.6256	28.707	27.948	50.0601
ENSG00000087191.8	PSMC5	protein_coding	chr17	61904512	61909379	+	4	21	4483	55.1181	56.1436	180.5	54.2238	55.4325	184.256	58.9157	59.9612	201.47	61.5705	62.8411	208.313
ENSG00000087206.12	UIMC1	protein_coding	chr5	176332006	176449634	-	21	15	4852	6.83765	6.37968	15.7513	6.45113	6.03071	14.4751	13.2548	12.7765	30.4811	12.7972	12.2971	28.3344
ENSG00000087237.6	CETP	protein_coding	chr16	56995762	57017757	+	17	4	2085	0.187849	0.172763	0.201123	0.131688	0.102855	0.125544	1.67783	1.63628	2.15716	1.97605	1.90372	2.2668
ENSG00000087245.8	MMP2	protein_coding	chr16	55423612	55540603	+	19	8	4933	1.52255	1.51883	2.3294	1.41932	1.47809	5.09199	159.504	163.978	306.231	160.595	165.15	307.416
ENSG00000087250.4	MT3	protein_coding	chr16	56622986	56625000	+	2	6	1837	241.24	246.547	831.333	226.765	231.783	785.441	0.137995	0.143968	0.475439	0.145124	0.151389	0.541053
ENSG00000087263.12	OGFOD1	protein_coding	chr16	56485402	56513012	+	14	11	5806	9.77356	9.8232	22.8432	10.4039	10.4695	24.3053	23.4156	23.7821	60.9908	20.9422	21.2802	54.298
ENSG00000087266.11	SH3BP2	protein_coding	chr4	2794750	2842825	+	23	30	13968	3.86459	3.91295	14.668	3.95434	4.03619	14.9918	5.8928	5.99636	19.9042	6.13874	6.18654	22.1233
ENSG00000087269.11	NOP14	protein_coding	chr4	2939660	2965112	-	18	5	3538	13.0954	12.3396	12.7153	12.5139	11.5504	12.0394	35.087	34.6246	36.7705	34.8945	34.6644	37.4175
ENSG00000087274.12	ADD1	protein_coding	chr4	2845584	2931803	+	20	28	13106	57.2673	58.0326	232.1	56.041	56.7415	215.443	23.0635	23.3635	88.8062	22.2663	22.6256	86.2779
ENSG00000087301.4	TXNDC16	protein_coding	chr14	52897308	53019240	-	22	4	4739	8.23554	8.23442	8.96485	9.34737	9.32713	10.0912	5.62199	5.60859	6.44585	4.88908	4.88674	5.37513
ENSG00000087302.4	C14orf166	protein_coding	chr14	52456193	52471420	+	8	7	2334	29.3566	28.428	62.9341	31.6449	31.1788	68.3445	84.6621	83.8504	184.854	81.0557	80.666	178.073
ENSG00000087303.12	NID2	protein_coding	chr14	52471521	52535712	-	21	8	6158	0.935332	0.893022	2.08722	1.09982	1.02154	2.71021	21.863	21.9761	40.6907	21.9137	21.9646	38.2348
ENSG00000087338.4	GMCL1	protein_coding	chr2	70056774	70108528	+	15	4	4922	4.31105	4.191	5.76779	4.98338	5.00092	7.16871	9.94008	9.85444	14.5125	9.61648	9.56419	12.1159
ENSG00000087448.5	KLHL42	protein_coding	chr12	27932953	27955973	+	5	4	7622	15.7967	15.5767	18.4158	17.012	17.0505	20.7454	9.73482	9.44481	13.9761	9.35151	8.98566	14.242
ENSG00000087460.19	GNAS	protein_coding	chr20	57414773	57486247	+	23	57	13320	229.986	235.21	1895.72	217.64	222.259	1770.72	154.517	157.309	1345.67	159.688	162.602	1399.58
ENSG00000087470.13	DNM1L	protein_coding	chr12	32832134	32898486	+	24	30	7184	35.2514	34.8746	72.6386	36.8978	36.4222	74.7063	25.251	25.0332	58.0581	22.1171	22.0795	54.7251
ENSG00000087494.11	PTHLH	protein_coding	chr12	28111017	28125638	-	7	10	3377	1.56914	1.6071	4.86581	1.69387	1.68639	5.01015	1.29864	1.12773	3.8273	0.976031	0.973246	2.87195
ENSG00000087495.12	PHACTR3	protein_coding	chr20	58152564	58422766	+	19	10	6095	25.2806	25.1094	67.305	25.5349	25.4936	68.9253	0.353524	0.360146	0.981433	0.449325	0.447982	1.21399
ENSG00000087502.13	ERGIC2	protein_coding	chr12	29490285	29534122	-	16	11	5826	7.30402	7.05255	32.2127	8.64018	8.51123	38.1653	12.3485	12.025	63.7363	11.3233	11.1178	56.0294
ENSG00000087510.5	TFAP2C	protein_coding	chr20	55204358	55214339	+	9	3	3112	0.318342	0.331815	0.453073	0.360269	0.359873	0.467429	21.2524	20.6935	23.5596	20.225	19.7901	23.4176
ENSG00000087586.13	AURKA	protein_coding	chr20	54944445	54967393	-	11	14	2928	1.07012	1.00879	1.43815	1.11747	1.1556	1.69004	60.9156	61.1042	89.4196	57.9819	58.3004	84.7964
ENSG00000087589.12	CASS4	protein_coding	chr20	54987168	55034396	+	7	4	4025	0.452196	0.387806	0.523187	0.363819	0.349283	0.508665	1.47375	1.49811	1.98792	1.22834	1.15575	1.59182
ENSG00000087842.6	PIR	protein_coding	chrX	15402921	15511687	-	12	6	2512	8.80475	8.43171	16.9038	9.13591	8.81225	17.1417	25.9754	25.0782	48.9337	24.5058	23.9836	47.0661
ENSG00000087916.7	SLC6A14	protein_coding	chrX	115567790	115592625	+	14	2	4521	0.0152881	0.015935	0.015935	0.005061	0.00527055	0.00527055	7.08179	6.94954	7.59521	6.83489	6.69935	8.53677
ENSG00000087995.11	METTL2A	protein_coding	chr17	60501228	60527454	+	8	3	3114	4.85345	4.78894	7.86958	4.65845	4.32335	7.07305	13.0493	12.3402	20.2016	13.7522	13.0956	22.2687
ENSG00000088002.7	SULT2B1	protein_coding	chr19	49055332	49102682	+	8	4	2822	0.587815	0.451009	1.11103	0.413508	0.278643	0.723859	3.69198	3.67369	7.96304	3.87325	3.76272	8.19253
ENSG00000088035.11	ALG6	protein_coding	chr1	63833261	63904233	+	15	7	4950	1.41493	1.30986	3.26205	1.69179	1.68482	3.84365	4.65514	4.56275	10.5063	4.02949	3.85102	9.41763
ENSG00000088038.13	CNOT3	protein_coding	chr19	54641444	54659419	+	18	10	6697	14.2769	14.2356	39.154	13.9328	13.6842	36.9099	19.865	19.8954	52.122	20.8593	20.7933	53.4434
ENSG00000088205.8	DDX18	protein_coding	chr2	118572226	118589955	+	14	6	7851	9.98038	10.0082	21.9986	10.824	11.0142	25.6124	29.021	29.199	85.6744	27.1344	27.1658	78.445
ENSG00000088256.4	GNA11	protein_coding	chr19	3094408	3124002	+	7	7	6242	40.7964	40.7378	63.7658	38.5183	38.4717	59.2293	16.0091	15.9944	26.826	17.0722	17.0963	27.7711
ENSG00000088280.14	ASAP3	protein_coding	chr1	23755056	23811061	-	27	11	4988	8.32327	8.31443	13.5193	8.76607	8.70388	13.9584	8.42112	8.22885	12.9057	8.19194	8.09447	12.5572
ENSG00000088305.14	DNMT3B	protein_coding	chr20	31350191	31397162	+	24	8	4630	1.20918	0.975087	1.17687	1.10203	0.946951	1.0929	31.8597	30.2282	34.1986	30.5171	28.9404	33.1464
ENSG00000088325.11	TPX2	protein_coding	chr20	30327074	30389608	+	19	2	3605	2.19207	2.2049	2.273	2.03103	2.06224	2.12593	127.832	129.483	133.474	119.457	120.638	124.325
ENSG00000088340.11	FER1L4	pseudogene	chr20	34146507	34195484	-	39	13	9212	0.612742	0.59175	2.17661	0.633369	0.576822	2.58778	5.91916	5.52364	22.3999	6.985	6.2848	22.7808
ENSG00000088356.4	PDRG1	protein_coding	chr20	30532758	30539895	-	5	1	1385	27.4307	27.3605	27.3605	27.11	27.0282	27.0282	39.6811	39.909	39.909	39.7221	39.8487	39.8487
ENSG00000088451.6	TGDS	protein_coding	chr13	95226308	95248511	-	12	3	2586	3.32312	2.99016	4.3168	3.40646	3.19736	4.70938	14.6746	14.3075	20.2153	12.9613	12.641	17.6053
ENSG00000088538.12	DOCK3	protein_coding	chr3	50712672	51421629	+	53	1	8755	34.331	34.3247	34.3247	34.3303	34.2385	34.2385	1.4651	1.36539	1.36539	1.53082	1.41498	1.41498
ENSG00000088543.10	C3orf18	protein_coding	chr3	50595462	50608458	-	8	11	3242	26.5923	26.14	37.5605	25.8803	25.3716	39.2172	4.1989	4.14405	6.97472	4.14145	4.08628	6.8851
ENSG00000088756.8	ARHGAP28	protein_coding	chr18	6729717	6915715	+	27	17	11910	0.143148	0.133076	0.424206	0.184429	0.190065	0.790156	0.785396	0.788298	2.92085	0.756984	0.751453	2.6267
ENSG00000088766.7	CRLS1	protein_coding	chr20	5986736	6020699	+	11	7	5370	6.58566	6.24278	20.5207	7.58858	7.33926	23.146	11.3862	10.7413	47.6838	11.9464	11.351	49.3451
ENSG00000088826.13	SMOX	protein_coding	chr20	4101627	4168394	+	12	12	4943	13.7824	14.1277	32.0901	13.0119	13.112	29.8781	10.3491	10.2513	23.543	11.6692	11.7484	27.074
ENSG00000088827.8	SIGLEC1	protein_coding	chr20	3667617	3687775	-	18	3	7886	0.303838	0.29538	0.412051	0.432315	0.398849	0.585633	0.0417889	0.0402438	0.057211	0.0645384	0.0641185	0.0760931
ENSG00000088832.10	FKBP1A	protein_coding	chr20	1349622	1373806	-	7	8	2369	84.9889	82.5644	146.952	82.7436	79.0383	134.316	145.518	140.149	261.423	146.448	140.945	257.967
ENSG00000088836.8	SLC4A11	protein_coding	chr20	3208063	3219836	-	20	7	4081	1.95897	1.83004	2.41383	1.95112	1.92097	2.58712	5.77684	5.12606	7.96922	6.30093	5.65606	8.65688
ENSG00000088882.7	CPXM1	protein_coding	chr20	2774715	2781283	-	14	1	2391	0.963576	0.954137	0.954137	0.488047	0.478357	0.478357	27.6928	26.5353	26.5353	30.7229	29.9767	29.9767
ENSG00000088888.13	MAVS	protein_coding	chr20	3827487	3849280	+	7	3	4240	7.12364	7.10795	7.4788	6.7671	6.81126	7.32216	20.6206	20.8019	21.6315	20.3774	20.6906	22.7814
ENSG00000088899.10	LZTS3	protein_coding	chr20	3143263	3154192	-	4	3	5349	107.378	108.681	134.934	100.664	102.062	127.235	6.03295	6.07155	7.46025	6.26168	6.30985	7.73894
ENSG00000088926.9	F11	protein_coding	chr4	187187099	187210835	+	17	7	4243	0.0271495	0.0113194	0.0153838	0.0808889	0.0786223	0.327033	1.94768	1.85745	3.37694	1.98204	1.76372	3.75169
ENSG00000088930.6	XRN2	protein_coding	chr20	21283942	21370463	+	31	3	3489	19.2158	18.3358	19.2448	20.1854	18.9451	20.2	81.9563	81.084	85.8039	80.48	79.4326	83.515
ENSG00000088970.11	PLK1S1	processed_transcript	chr20	21106624	21227260	+	16	13	4802	12.1529	11.747	22.6891	12.0884	11.8297	23.7471	15.5731	14.5783	27.4488	14.2881	13.615	26.2481
ENSG00000088986.6	DYNLL1	protein_coding	chr12	120907653	120936296	+	7	11	2957	140.619	144.353	591.614	142.956	146.861	602.574	83.842	86.3793	354.911	81.2884	83.4894	341.882
ENSG00000088992.13	TESC	protein_coding	chr12	117476728	117537284	-	11	9	1926	15.5628	14.2763	27.3663	12.4145	12.0131	22.7413	14.5702	13.91	27.6648	15.1379	14.5049	28.5452
ENSG00000089009.11	RPL6	protein_coding	chr12	112842994	112856642	-	6	13	4447	110.155	108.811	510.567	107.252	106.26	497.479	385.041	381.597	1773.11	380.997	377.063	1752.14
ENSG00000089022.9	MAPKAPK5	protein_coding	chr12	112279782	112334343	+	18	10	5576	7.1522	6.38682	22.4104	6.81171	5.96559	19.9166	14.7343	13.7404	51.5295	14.6692	13.7971	49.9582
ENSG00000089048.10	ESF1	protein_coding	chr20	13694969	13765532	-	14	1	3216	8.18834	7.98977	7.98977	8.27436	7.96495	7.96495	22.4412	22.2611	22.2611	20.3999	20.1406	20.1406
ENSG00000089050.10	RBBP9	protein_coding	chr20	18467184	18477887	-	5	3	3861	6.21178	6.30052	6.77582	6.84468	7.02317	7.26545	11.6211	11.7268	12.9064	10.0684	10.156	11.2564
ENSG00000089053.8	ANAPC5	protein_coding	chr12	121746048	121837699	-	18	24	12304	20.1592	20.2453	105.653	19.6729	19.7555	102.673	25.086	24.9401	131.559	24.8581	24.8114	130.744
ENSG00000089057.10	SLC23A2	protein_coding	chr20	4833002	4990939	-	18	6	7523	34.6551	35.3269	39.0469	34.5903	35.0565	39.3153	17.1413	17.3453	18.826	17.1934	17.3206	19.0823
ENSG00000089060.7	SLC8B1	protein_coding	chr12	113736564	113797298	-	18	16	6768	4.44238	4.33943	10.9149	4.49975	4.37272	11.2823	6.65956	6.63907	18.3786	6.78944	6.75754	17.0198
ENSG00000089063.10	TMEM230	protein_coding	chr20	5080486	5093749	-	6	9	2038	64.7876	65.5262	88.3806	68.9005	69.6957	94.7483	94.2469	95.2762	128.17	84.8488	85.5839	114.984
ENSG00000089094.12	KDM2B	protein_coding	chr12	121866900	122018920	-	26	18	13623	5.4135	5.47338	19.383	5.56441	5.6339	20.3686	10.1619	10.1648	33.2339	9.99636	10.0679	34.1769
ENSG00000089101.13	C20orf26	protein_coding	chr20	20033158	20341346	+	41	22	7319	0.299046	0.249361	0.75913	0.484563	0.406958	1.94916	0.0450262	0.0252942	0.404453	0.0397361	0.0345429	0.197049
ENSG00000089116.3	LHX5	protein_coding	chr12	113899839	113910085	-	6	2	3125	1.21646	1.17573	1.25014	0.820047	0.762502	0.810758	0.259582	0.262353	0.278956	0.18613	0.177985	0.189249
ENSG00000089123.11	TASP1	protein_coding	chr20	13246709	13619587	-	19	9	3365	3.23164	3.16144	5.2567	2.60426	2.5209	3.60665	4.42962	4.30695	6.61796	4.98398	4.83099	7.99614
ENSG00000089127.8	OAS1	protein_coding	chr12	113344582	113369990	+	8	11	3910	1.90323	1.80566	4.55005	1.96623	1.89528	4.33297	7.31966	7.19679	17.8184	6.5269	6.22673	15.8712
ENSG00000089157.11	RPLP0	protein_coding	chr12	120634489	120639038	-	2	27	4001	101.272	103.517	361.318	97.7565	100.131	350.078	895.548	916.934	3287.99	931.236	954.35	3396.97
ENSG00000089159.11	PXN	protein_coding	chr12	120648250	120703574	-	21	20	7452	12.6604	12.3164	23.3264	11.3544	11.2778	20.9355	28.0371	27.9552	61.4368	28.9092	28.7696	62.9279
ENSG00000089163.4	SIRT4	protein_coding	chr12	120740119	120751052	+	4	3	1222	4.31747	4.08751	4.28591	5.11166	4.91383	5.09717	1.36914	1.38511	1.39618	2.16178	2.13096	2.23929
ENSG00000089169.10	RPH3A	protein_coding	chr12	113008184	113336686	+	40	29	10381	62.4703	63.0599	160.981	57.0421	57.7651	146.52	0.156284	0.157953	0.590879	0.140077	0.141253	0.524416
ENSG00000089195.10	TRMT6	protein_coding	chr20	5917881	5931182	-	9	5	3754	7.40148	7.22215	12.212	7.9845	8.01678	13.028	15.5853	15.3933	26.8711	14.0353	13.8397	24.2397
ENSG00000089199.5	CHGB	protein_coding	chr20	5892076	5906007	+	6	3	4535	216.598	222.984	396.915	224.918	231.52	411.959	1.80551	1.87781	3.33956	1.56049	1.57211	2.79588
ENSG00000089220.4	PEBP1	protein_coding	chr12	118573663	118583389	+	5	2	1780	874.01	878.714	957.29	878.236	884.534	964.641	249.211	250.265	279.168	253.971	255.887	293.948
ENSG00000089248.6	ERP29	protein_coding	chr12	112451120	112461255	+	5	5	3083	40.1372	41.2283	83.9956	40.225	41.2877	83.3368	101.506	104.055	194.186	105.087	108	201.8
ENSG00000089280.14	FUS	protein_coding	chr16	31191431	31203127	+	12	13	7218	61.5333	60.8936	241.866	60.6857	60.4156	242.159	125.14	124.078	517.591	130.321	129.082	518.499
ENSG00000089289.11	IGBP1	protein_coding	chrX	69353299	69386174	+	6	2	1862	45.9173	46.429	51.7123	46.1425	46.9781	52.3757	59.0042	59.9102	66.7149	57.5956	58.6562	65.4342
ENSG00000089327.10	FXYD5	protein_coding	chr19	35645633	35660786	+	9	13	2993	4.36457	4.38079	15.2228	3.76122	3.73385	12.6556	57.5176	57.2676	192.097	59.2005	58.9771	199.086
ENSG00000089335.16	ZNF302	protein_coding	chr19	35168544	35177302	+	6	13	5032	20.4614	20.2011	42.06	24.0266	23.8519	46.6176	7.77823	7.54198	15.2109	7.60496	7.42079	15.623
ENSG00000089351.10	GRAMD1A	protein_coding	chr19	35485688	35517375	+	25	15	5942	15.3426	14.7108	35.5212	14.5017	13.9994	34.702	18.9803	17.9324	54.0445	21.4418	20.3932	59.2124
ENSG00000089356.12	FXYD3	protein_coding	chr19	35606732	35615228	+	11	18	3385	1.06858	0.808747	3.59237	0.959843	0.809524	3.10583	9.26371	9.06303	51.2738	9.89475	9.72439	55.994
ENSG00000089472.12	HEPH	protein_coding	chrX	65382391	65488709	+	23	10	7113	6.44887	6.44833	11.5434	6.35631	6.38165	11.3611	7.73359	7.54403	13.0958	7.16543	7.07666	12.5354
ENSG00000089486.12	CDIP1	protein_coding	chr16	4560676	4588829	-	10	14	4268	91.6652	94.3516	188.51	85.6206	88.2949	177.11	13.7678	14.1219	26.9412	14.4176	14.8386	28.0431
ENSG00000089558.4	KCNH4	protein_coding	chr17	40308909	40333296	-	17	2	3924	2.09606	1.9155	1.98342	1.87175	1.61526	1.6649	0.200266	0.195453	0.206006	0.586746	0.547646	0.557726
ENSG00000089597.12	GANAB	protein_coding	chr11	62392298	62414104	-	25	16	4933	58.8144	59.03	88.903	57.5011	57.5683	89.8352	289.644	294.684	420.141	291.615	296.895	413.202
ENSG00000089639.6	GMIP	protein_coding	chr19	19740285	19754476	-	21	9	3740	2.26079	2.10605	2.59486	2.26361	2.24902	2.37743	10.594	10.4302	12.6145	10.5432	10.3291	13.9526
ENSG00000089682.12	RBM41	protein_coding	chrX	106307650	106362057	-	10	9	6105	2.61525	2.2539	6.17022	2.86338	2.61115	6.12943	5.971	5.05978	14.7749	5.39498	4.6754	14.4951
ENSG00000089685.10	BIRC5	protein_coding	chr17	76210267	76221717	+	5	11	3815	0.320071	0.333617	0.557665	0.191923	0.199869	0.457264	41.2706	42.1971	67.0337	42.0933	42.9627	69.4393
ENSG00000089692.4	LAG3	protein_coding	chr12	6881678	6887621	+	5	4	3056	0.452338	0.447907	0.74103	0.34441	0.319684	0.575151	1.60925	1.53177	2.41565	1.58611	1.32366	2.37243
ENSG00000089693.6	MLF2	protein_coding	chr12	6857170	6876641	-	10	11	3773	126.333	127.034	327.916	117.127	117.726	304.568	80.5038	80.2728	214.425	83.1452	82.647	214.917
ENSG00000089723.5	OTUB2	protein_coding	chr14	94492675	94515276	+	6	2	4252	1.09994	1.10131	1.19397	1.18386	1.18244	1.28193	1.31161	1.34349	1.45653	1.55036	1.51026	1.63733
ENSG00000089737.11	DDX24	protein_coding	chr14	94517266	94547591	-	9	8	6007	93.5908	94.7052	200.18	91.645	92.4646	191.309	49.6572	50.4722	96.5	47.7371	48.1059	93.5495
ENSG00000089775.7	ZBTB25	protein_coding	chr14	64915824	64971931	-	8	4	12229	1.98382	1.92836	5.40507	2.15355	2.03228	4.14954	2.92282	2.80926	9.67417	3.11542	2.96048	9.69912
ENSG00000089818.12	NECAP1	protein_coding	chr12	8234807	8250367	+	6	9	4155	66.3337	63.8238	104.204	67.7337	65.7268	106.986	15.9908	15.4671	27.5801	16.1221	15.589	27.3035
ENSG00000090006.13	LTBP4	protein_coding	chr19	41098789	41135725	+	36	44	8109	6.27332	6.08275	22.0353	5.38935	5.1541	21.2143	18.1722	17.292	61.8216	20.4131	19.4049	67.7959
ENSG00000090013.5	BLVRB	protein_coding	chr19	40953696	40971747	-	4	4	1665	20.1194	19.9613	37.9931	19.4177	19.1198	36.4973	53.4705	53.2749	101.647	59.0245	59.31	113.303
ENSG00000090020.6	SLC9A1	protein_coding	chr1	27425306	27493472	-	14	7	5974	16.3865	16.5615	26.5115	14.1942	14.399	24.0497	13.2774	13.3562	21.2749	13.9556	14.0037	21.2748
ENSG00000090054.9	SPTLC1	protein_coding	chr9	94794281	94877666	-	18	7	3658	17.3077	16.6746	36.7791	17.9456	16.982	35.3825	24.83	23.8875	51.4307	24.8519	23.7614	52.0248
ENSG00000090060.13	PAPOLA	protein_coding	chr14	96967770	97033448	+	22	25	12766	13.0337	13.0586	59.5586	14.8135	14.7139	67.1641	25.0579	25.1168	104.686	22.5803	22.7272	96.5296
ENSG00000090104.7	RGS1	protein_coding	chr1	192544857	192549161	+	3	6	4117	3.87809	3.82056	11.1374	5.5354	5.26685	15.0642	0.116989	0.122053	0.37889	0.147168	0.153522	0.42133
ENSG00000090238.7	YPEL3	protein_coding	chr16	30103635	30108236	-	4	12	3181	109.466	110.71	366.712	100.234	101.103	326.539	17.4922	17.4844	52.6396	19.131	18.9714	57.5916
ENSG00000090263.11	MRPS33	protein_coding	chr7	140705854	140715028	-	7	9	1818	18.9204	18.8758	49.9591	16.9529	17.0126	43.9349	36.6442	37.4737	98.2961	34.6605	35.3502	92.4891
ENSG00000090273.9	NUDC	protein_coding	chr1	27226729	27273353	+	12	4	2856	76.1516	77.0369	123.611	77.3107	77.9255	124.429	105.864	105.686	171.008	106.201	106.094	171.851
ENSG00000090316.11	MAEA	protein_coding	chr4	1283639	1333935	+	12	21	9857	11.0649	11.2945	48.5401	10.9889	11.2022	48.9914	9.58235	9.83607	43.2582	10.4004	10.6673	47.68
ENSG00000090339.4	ICAM1	protein_coding	chr19	10381511	10397291	+	8	5	3706	4.81173	4.84041	5.58715	4.11805	4.15997	4.74072	43.1753	43.9377	52.8919	46.1433	46.88	55.1264
ENSG00000090372.10	STRN4	protein_coding	chr19	47222764	47250251	-	21	24	7641	17.2921	17.3231	48.4678	16.0474	16.2565	45.4878	20.6122	20.7463	55.4189	22.8877	22.9559	62.3112
ENSG00000090376.4	IRAK3	protein_coding	chr12	66582659	66648402	+	13	3	10004	1.08701	1.0754	1.35613	1.02465	1.00991	1.22794	0.902091	0.872397	1.06848	0.734048	0.745519	0.860922
ENSG00000090382.2	LYZ	protein_coding	chr12	69742121	69748014	+	4	3	1764	1.61953	1.68807	2.5985	2.4126	2.37741	3.18238	135.601	138.831	181.814	133.145	136.829	185.954
ENSG00000090432.5	MUL1	protein_coding	chr1	20825943	20834654	-	4	1	2436	18.0643	17.9021	17.9021	16.7473	16.6191	16.6191	24.5277	24.6446	24.6446	24.5441	24.9602	24.9602
ENSG00000090447.7	TFAP4	protein_coding	chr16	4307187	4323076	-	6	7	7867	2.46879	2.46643	8.32267	2.50999	2.52305	8.39849	4.95588	5.00228	17.7222	5.20019	5.23828	19.1885
ENSG00000090470.10	PDCD7	protein_coding	chr15	65409717	65426174	-	5	3	3263	13.5001	13.8801	16.7146	13.3091	13.5827	16.504	27.3308	27.9949	32.7114	27.0358	27.5599	31.6192
ENSG00000090487.6	SPG21	protein_coding	chr15	65255362	65282648	-	15	14	3984	17.7824	17.9503	42.8775	17.1721	17.3747	42.8346	40.2517	40.5797	99.8893	40.3624	40.5628	96.446
ENSG00000090520.6	DNAJB11	protein_coding	chr3	186285192	186315061	+	12	6	6040	8.88378	9.00529	42.2287	8.72424	8.86061	43.0434	29.7398	29.8841	129.559	28.6896	28.9486	128.43
ENSG00000090534.13	THPO	protein_coding	chr3	184089723	184095932	-	6	4	1915	2.4182	2.21958	3.01974	2.77198	2.40148	2.8694	0.820724	0.842432	0.975927	1.21495	1.12217	1.37322
ENSG00000090581.5	GNPTG	protein_coding	chr16	1401924	1413352	+	8	9	3672	42.0501	41.0437	124.056	38.577	37.8837	112.135	19.5922	18.6035	53.1945	21.0478	19.8772	57.8189
ENSG00000090659.13	CD209	protein_coding	chr19	7804879	7812464	-	6	12	4428	0.900127	0.900258	1.0082	0.671748	0.678038	1.2434	0.0171746	0.0179179	0.0844947	0.0109466	0.0114191	0.0128989
ENSG00000090661.7	CERS4	protein_coding	chr19	8271620	8327305	+	18	16	4059	18.2882	16.8614	51.1633	15.9754	14.5294	45.6333	7.76918	7.34961	23.8977	9.25483	8.62662	27.2969
ENSG00000090686.11	USP48	protein_coding	chr1	22004791	22110099	-	30	15	9497	13.9079	13.4977	38.3565	14.9495	14.3917	42.6057	18.3804	18.1511	52.6339	17.6977	17.3036	49.6703
ENSG00000090776.5	EFNB1	protein_coding	chrX	68048840	68061990	+	5	1	3314	4.05305	4.18834	4.18834	3.52809	3.55913	3.55913	16.3389	16.6709	16.6709	16.9226	17.3937	17.3937
ENSG00000090857.9	PDPR	protein_coding	chr16	70147529	70195203	+	21	12	9148	8.88773	8.75985	11.4198	8.2914	8.19973	10.7512	16.7844	16.6608	21.7686	16.0362	15.8966	20.6222
ENSG00000090905.13	TNRC6A	protein_coding	chr16	24741016	24838953	+	25	18	12522	14.6823	14.6056	35.2504	15.3617	15.3412	35.5261	12.8652	12.8707	29.1667	12.0501	11.9707	29.1791
ENSG00000090920.9	FCGBP	protein_coding	chr19	40353963	40440533	-	37	3	16564	1.00563	1.02064	1.03148	1.05536	1.07172	1.0831	0.249457	0.253867	0.256562	0.321894	0.323579	0.37665
ENSG00000090932.6	DLL3	protein_coding	chr19	39989535	39999121	+	8	5	2618	3.14169	3.21044	3.84906	3.60079	3.72258	4.56878	11.542	11.698	14.6844	13.0343	13.1045	16.4415
ENSG00000090971.4	NAT14	protein_coding	chr19	55996371	55998935	+	2	5	2163	31.9544	32.4518	56.3335	30.3279	31.0108	55.2451	16.8061	16.971	30.2799	18.4989	18.9351	33.2598
ENSG00000091039.12	OSBPL8	protein_coding	chr12	76745577	76953589	-	29	17	9198	8.17064	8.13002	15.162	10.0075	9.97374	17.4347	12.5867	12.6857	24.5805	11.28	11.3189	24.1485
ENSG00000091073.15	DTX2	protein_coding	chr7	76090993	76135312	+	19	22	5042	1.52162	1.41456	4.35869	1.84244	1.81476	5.23269	5.08805	5.11942	14.2014	5.3307	5.25495	14.6046
ENSG00000091127.9	PUS7	protein_coding	chr7	105080108	105162714	-	18	6	4421	3.53325	3.3623	5.10701	3.80915	3.69199	5.24615	22.5115	21.9782	35.9308	21.2426	20.7528	33.7678
ENSG00000091129.15	NRCAM	protein_coding	chr7	107788068	108097161	-	42	16	7939	66.4097	66.7126	102.995	75.8907	76.3828	126.084	7.28339	7.17553	9.93007	7.10373	7.03461	10.0475
ENSG00000091137.7	SLC26A4	protein_coding	chr7	107301080	107358254	+	25	10	5800	0.98512	0.861196	1.68569	0.998075	0.891502	1.65655	0.445806	0.442301	0.879106	0.338464	0.326921	0.68982
ENSG00000091140.8	DLD	protein_coding	chr7	107531415	107572175	+	16	14	5299	17.3	17.4838	42.7643	18.3081	18.6524	45.613	32.4251	33.2245	83.9477	30.6983	31.2267	79.8981
ENSG00000091164.8	TXNL1	protein_coding	chr18	54264439	54318831	-	13	12	11298	11.179	11.0123	59.824	11.9345	11.7517	60.401	8.6384	8.45045	63.5646	7.99491	7.84774	57.3854
ENSG00000091262.10	ABCC6	protein_coding	chr16	16242785	16317379	-	33	7	7559	0.121916	0.120722	0.247149	0.148321	0.135549	0.34841	1.81094	1.67589	4.5782	2.1193	2.00008	4.90134
ENSG00000091317.7	CMTM6	protein_coding	chr3	32522804	32544900	-	4	3	4413	4.8083	4.81044	5.49533	5.49076	5.57233	6.55492	27.2109	27.3997	31.7005	24.4554	24.6517	28.1616
ENSG00000091409.10	ITGA6	protein_coding	chr2	173292082	173371181	+	28	14	6704	8.54344	8.37127	11.4922	8.93524	8.78273	11.8975	22.5516	22.5611	29.7477	20.5049	20.5529	28.8623
ENSG00000091428.13	RAPGEF4	protein_coding	chr2	173600002	173917621	+	39	17	7161	67.4507	67.5822	139.883	69.1727	69.2751	140.042	1.45139	1.34801	3.54843	1.1507	1.11564	2.32747
ENSG00000091436.12	MLTK	protein_coding	chr2	173940163	174132738	+	25	9	13799	2.30742	2.24844	4.80436	2.51541	2.47796	5.50148	8.20988	8.06304	22.3188	7.95621	7.84896	21.35
ENSG00000091482.5	SMPX	protein_coding	chrX	21724090	21776281	-	6	2	1040	4.34198	4.08702	4.88122	5.34618	4.90311	5.43628	0.316872	0.203437	0.22556	0.396161	0.291715	0.371155
ENSG00000091483.6	FH	protein_coding	chr1	241660903	241683061	-	11	3	2142	51.4992	52.5799	64.0167	50.3655	50.849	60.7039	103.269	106.059	127.913	100.45	102.426	124.896
ENSG00000091490.6	SEL1L3	protein_coding	chr4	25749055	25865382	-	29	13	7483	16.4196	16.4277	30.9051	16.429	16.4724	31.453	11.4875	11.4828	21.3497	10.879	11.0209	20.9082
ENSG00000091527.11	CDV3	protein_coding	chr3	133292574	133309105	+	6	9	4367	31.8285	32.3451	48.5816	34.9106	35.2976	55.1925	97.5969	99.1015	157.597	89.0289	89.7228	142.056
ENSG00000091542.8	ALKBH5	protein_coding	chr17	18086392	18113268	+	5	3	3190	63.7728	63.9423	75.3076	61.441	60.9673	72.7075	60.9745	61.1014	72.1614	62.9369	63.181	73.8854
ENSG00000091583.6	APOH	protein_coding	chr17	64208151	64252643	-	10	4	1332	0.15567	0.162258	0.205514	0.103067	0.107334	0.142675	196.879	194.44	220.562	189.592	186.578	212.399
ENSG00000091622.11	PITPNM3	protein_coding	chr17	6354584	6459814	-	22	5	10609	22.8762	22.3889	34.4145	22.9778	22.6625	34.4357	1.39305	1.37357	2.19591	1.64252	1.61095	2.65501
ENSG00000091640.3	SPAG7	protein_coding	chr17	4862521	4871167	-	6	8	2831	23.9994	22.9368	61.7151	22.5009	21.867	59.3227	23.9081	23.1398	62.9298	26.2304	25.5945	69.658
ENSG00000091651.4	ORC6	protein_coding	chr16	46723555	46732306	+	7	9	4309	1.47035	1.4044	4.08563	1.61955	1.58154	4.55972	17.2313	15.9761	45.1338	16.2321	15.2196	42.7053
ENSG00000091656.11	ZFHX4	protein_coding	chr8	77593454	77779521	+	18	14	15696	1.14344	1.13828	1.27888	1.18077	1.19475	1.33767	0.652479	0.670607	0.76871	0.707184	0.708719	0.832776
ENSG00000091664.7	SLC17A6	protein_coding	chr11	22359643	22401049	+	12	2	4219	4.60891	4.50229	4.81012	5.76494	5.8342	6.2331	0.012017	0.012537	0.0133942	0	0	0
ENSG00000091732.11	ZC3HC1	protein_coding	chr7	129658126	129691291	-	16	11	3011	7.24611	7.20184	11.3558	5.36494	5.41298	8.82786	18.5135	18.7526	29.9218	18.706	19.0097	30.276
ENSG00000091831.17	ESR1	protein_coding	chr6	151977826	152450754	+	18	13	13629	0.0507134	0.0458117	0.104845	0.0419708	0.0437086	0.139145	2.46262	2.44695	5.24616	2.40241	2.38369	5.28111
ENSG00000091844.3	RGS17	protein_coding	chr6	153325594	153452384	-	5	2	7899	1.71211	1.6812	2.62933	2.20436	2.18101	3.0442	0.92426	0.887254	1.63092	0.840687	0.806564	2.06743
ENSG00000091879.9	ANGPT2	protein_coding	chr8	6357172	6420930	-	9	4	6784	1.80672	1.81239	4.13057	2.09111	2.05476	3.98095	0.0112101	0.0116952	0.0356362	0.00357248	0.0037267	0.00841049
ENSG00000091947.5	TMEM101	protein_coding	chr17	42088556	42101314	-	8	9	3029	6.64019	6.49309	12.8819	6.60967	6.58441	13.3664	15.0977	14.8867	29.8462	16.5465	16.4178	33.1141
ENSG00000091986.11	CCDC80	protein_coding	chr3	112323407	112368377	-	10	8	5305	4.98565	5.11969	11.7234	4.40795	4.52309	9.69847	19.7781	20.305	35.6793	18.9957	19.3773	34.6706
ENSG00000092010.10	PSME1	protein_coding	chr14	24605367	24608176	+	5	10	1781	35.6776	35.7178	64.0935	33.6595	33.4745	60.0626	147.387	146.92	265.345	148.843	149.704	269.43
ENSG00000092020.6	PPP2R3C	protein_coding	chr14	35554673	35591723	-	13	20	3863	9.5544	9.43034	25.3384	11.005	10.7082	30.9249	11.0836	10.8923	24.0604	10.4208	10.1573	23.7687
ENSG00000092067.5	CEBPE	protein_coding	chr14	23586513	23588825	-	2	1	1554	0.0593027	0.0618124	0.0618124	0.0441714	0.0460003	0.0460003	1.71282	1.66782	1.66782	1.65314	1.6757	1.6757
ENSG00000092094.6	OSGEP	protein_coding	chr14	20914570	20923264	-	6	13	5041	15.0319	14.3151	45.9525	14.9013	14.0199	44.3576	13.9899	13.1316	40.2457	14.1732	13.481	42.6726
ENSG00000092096.10	SLC22A17	protein_coding	chr14	23815515	23822121	-	10	9	4278	211.789	209.93	386.109	200.14	198.089	365.491	5.5286	5.36603	11.1292	5.25164	4.98192	10.7485
ENSG00000092108.16	SCFD1	protein_coding	chr14	31091318	31205018	+	31	26	6571	8.68831	8.36529	28.1944	9.55832	9.21796	34.0223	15.2847	14.6542	51.7849	14.6314	14.0049	53.6469
ENSG00000092140.10	G2E3	protein_coding	chr14	31028329	31089269	+	22	15	10025	1.69605	1.59775	5.25211	2.0199	1.89912	6.43956	4.78169	4.48739	17.2991	4.15331	3.87614	14.5265
ENSG00000092199.13	HNRNPC	protein_coding	chr14	21677295	21737653	-	13	34	7315	62.9158	63.1819	302.894	63.2748	63.6146	307.26	134.366	135.177	689.301	128.938	129.61	665.305
ENSG00000092201.5	SUPT16H	protein_coding	chr14	21819631	21852425	-	27	8	7151	30.7295	31.0662	55.6331	30.064	30.4958	54.1504	77.6658	78.7821	134.628	74.5135	75.2801	127.109
ENSG00000092203.9	TOX4	protein_coding	chr14	21944756	21967319	+	10	13	7076	19.0896	19.4258	41.5167	19.1719	19.5717	40.1749	20.6459	21.1022	59.1708	20.9511	21.3696	58.0085
ENSG00000092208.12	GEMIN2	protein_coding	chr14	39583427	39606177	+	11	12	2532	5.06824	4.84645	12.9187	5.24125	5.1383	12.7887	11.2732	10.9046	29.339	9.62919	9.23609	26.1579
ENSG00000092295.7	TGM1	protein_coding	chr14	24718320	24733638	-	16	9	3735	2.82514	2.46249	5.85959	2.80573	2.5774	5.53615	1.49995	1.30287	2.85977	1.45998	1.31317	2.74356
ENSG00000092330.11	TINF2	protein_coding	chr14	24708849	24711880	-	4	16	2712	26.1484	26.7325	39.6927	27.6054	27.9489	41.3027	27.4529	28.1632	40.9702	27.2294	27.9574	40.0632
ENSG00000092439.9	TRPM7	protein_coding	chr15	50844670	50979012	-	39	9	9198	4.41846	4.34698	10.5386	4.86073	4.75631	9.09235	16.4479	16.369	28.8854	15.4194	15.3401	29.0932
ENSG00000092445.7	TYRO3	protein_coding	chr15	41849873	41871536	+	20	9	6697	53.8565	54.662	102.708	51.3579	51.926	100.338	10.9431	11.0376	20.2064	12.2825	12.5183	23.1726
ENSG00000092470.7	WDR76	protein_coding	chr15	44119161	44160617	+	14	4	4078	2.42368	2.35548	2.91159	2.45752	2.48916	3.27527	16.8335	16.9914	26.2632	17.4309	17.582	26.0802
ENSG00000092531.5	SNAP23	protein_coding	chr15	42783431	42837547	+	12	21	5893	3.94085	3.8672	20.0272	4.40299	4.33864	23.5393	12.9136	12.9474	62.8778	11.9431	11.9224	55.4152
ENSG00000092607.9	TBX15	protein_coding	chr1	119425669	119532179	-	10	3	3806	0.460056	0.479525	0.552858	0.420823	0.419466	0.460359	1.1789	1.16739	1.47019	1.20987	1.2156	1.40588
ENSG00000092621.7	PHGDH	protein_coding	chr1	120202421	120286838	+	17	7	5622	25.6209	26.1413	77.0868	24.2605	24.6843	72.7735	71.5628	72.5571	214.606	78.3845	79.2545	235.336
ENSG00000092758.11	COL9A3	protein_coding	chr20	61447596	61472511	+	33	14	4831	16.2671	15.9514	44.1944	14.7155	14.0967	38.8652	29.7995	28.664	70.2195	33.1153	32.1166	78.5894
ENSG00000092820.13	EZR	protein_coding	chr6	159186773	159240444	-	15	4	3336	29.1994	27.7501	30.15	29.959	29.0138	31.4379	97.6604	95.9888	103.588	99.4347	97.1793	108.224
ENSG00000092847.6	AGO1	protein_coding	chr1	36335409	36395211	+	20	2	12886	8.66067	8.84456	8.91095	8.17323	8.2805	8.34266	10.9457	11.1546	12.0063	10.459	10.5593	11.2613
ENSG00000092853.9	CLSPN	protein_coding	chr1	36185819	36235568	-	27	6	5411	0.340626	0.310661	0.957761	0.296	0.303852	0.809235	13.5673	13.3041	20.6296	14.1267	13.6946	20.4181
ENSG00000092929.7	UNC13D	protein_coding	chr17	73823306	73840798	-	29	17	7752	2.36573	2.17465	6.76217	2.21075	2.0072	6.05999	12.3511	11.9918	29.4307	13.7279	13.2378	33.3794
ENSG00000092969.7	TGFB2	protein_coding	chr1	218519577	218617961	+	8	4	5151	5.5462	5.54315	9.87372	6.04557	5.99521	8.5667	4.65558	4.47199	8.75226	4.12162	4.00506	7.77289
ENSG00000092978.6	GPATCH2	protein_coding	chr1	217600334	217804424	-	13	5	8833	1.73452	1.74539	3.9596	1.72519	1.75076	4.36285	3.15401	3.06895	7.42273	2.7959	2.70765	6.73803
ENSG00000093009.5	CDC45	protein_coding	chr22	19466982	19508135	+	20	12	2846	0.0728573	0.0759406	0.113215	0.152753	0.0920977	0.27071	38.6749	36.836	66.287	41.2586	38.829	66.1565
ENSG00000093072.11	CECR1	protein_coding	chr22	17660194	17702879	-	13	9	5136	6.74217	6.89658	11.4423	6.49536	6.67152	11.1971	4.53591	4.58804	8.67194	4.12422	4.18412	6.97778
ENSG00000093183.9	SEC22C	protein_coding	chr3	42589461	42642572	-	18	17	8159	12.2693	12.3058	32.4122	11.6689	11.679	32.3429	10.3214	10.2948	30.2328	10.3341	10.3898	31.2407
ENSG00000093217.5	XYLB	protein_coding	chr3	38388251	38462839	+	21	6	5343	1.0392	0.921373	1.92318	0.976383	0.851803	2.01981	5.08608	4.73202	9.74089	5.39781	5.05828	10.6644
ENSG00000094631.14	HDAC6	protein_coding	chrX	48659784	48683392	+	21	38	10412	17.2019	17.1964	74.7409	16.0047	16.1181	75.7473	14.905	15.0015	68.7594	15.3626	15.511	65.9898
ENSG00000094755.12	GABRP	protein_coding	chr5	170190354	170241051	+	16	10	4621	0.00997148	0.0103935	0.0306498	0	0	0	0.685722	0.652444	0.989622	0.58216	0.558052	0.917445
ENSG00000094796.4	KRT31	protein_coding	chr17	39549976	39553844	-	7	1	1596	12.0392	10.2316	10.2316	12.2289	10.5256	10.5256	0.0158833	0.0165707	0.0165707	0.0303706	0.0316816	0.0316816
ENSG00000094804.5	CDC6	protein_coding	chr17	38443885	38459171	+	12	5	3382	1.03546	1.00828	1.11003	1.21778	1.26116	1.38843	47.1467	47.1305	65.0659	43.4766	43.3725	58.8101
ENSG00000094841.9	UPRT	protein_coding	chrX	74493920	74524435	+	11	8	2825	5.97793	5.83989	8.8095	6.39042	6.36824	9.45054	6.94539	6.79661	11.0079	6.39136	6.31824	9.50717
ENSG00000094880.6	CDC23	protein_coding	chr5	137523339	137549032	-	14	9	4616	8.17049	8.05846	14.3507	8.90744	8.76006	16.0711	23.8395	23.5822	38.9489	21.6053	21.5028	34.2894
ENSG00000094914.8	AAAS	protein_coding	chr12	53701240	53718648	-	13	20	4138	15.8846	15.1583	39.6023	15.1064	14.3787	37.3862	29.4604	28.8627	74.3637	31.2522	30.5913	78.4948
ENSG00000094963.9	FMO2	protein_coding	chr1	171154347	171181822	+	10	8	6239	0.42836	0.400299	0.722062	0.61612	0.630173	1.14661	0.0325049	0.0339117	0.0766904	0	0	0
ENSG00000094975.9	SUCO	protein_coding	chr1	172501489	172580971	+	25	9	7835	5.30473	5.28096	8.9298	5.58075	5.6993	9.01028	11.282	11.264	18.2355	10.9254	10.9743	17.1861
ENSG00000095059.11	DHPS	protein_coding	chr19	12786531	12792716	-	8	22	3006	48.9293	48.4916	127.566	45.1146	45.1118	119.322	44.0712	43.779	123.039	42.9003	42.8598	113.522
ENSG00000095261.9	PSMD5	protein_coding	chr9	123577774	123605262	-	11	8	4432	10.8957	10.918	14.8411	10.4182	10.3657	14.6276	24.8979	25.0028	35.9342	22.0593	22.2529	32.0137
ENSG00000095370.15	SH2D3C	protein_coding	chr9	130500596	130541020	-	17	13	4599	8.42613	8.25012	14.3942	7.85081	7.71475	13.4506	2.99854	2.91554	4.39486	2.76136	2.71015	4.08446
ENSG00000095380.10	NANS	protein_coding	chr9	100819021	100845357	+	6	6	4922	6.50169	6.55241	27.4917	5.78295	5.81907	24.4287	19.5454	19.5316	81.8673	19.1394	19.2106	81.0598
ENSG00000095383.15	TBC1D2	protein_coding	chr9	100961311	101017915	-	13	6	3563	7.30035	6.79378	10.1807	6.3126	5.92528	8.70648	4.09808	4.04534	4.93029	4.27849	4.21484	4.84139
ENSG00000095397.9	DFNB31	protein_coding	chr9	117164360	117267730	-	14	5	5542	17.0486	16.3662	30.101	16.0562	15.6504	29.0075	16.8694	16.0294	30.8408	17.746	16.6007	31.72
ENSG00000095564.9	BTAF1	protein_coding	chr10	93683526	93790082	+	39	4	7673	10.7404	10.8381	16.5972	10.6666	10.7635	15.1548	26.331	26.3124	42.7284	25.3507	25.4368	40.2726
ENSG00000095574.7	IKZF5	protein_coding	chr10	124750322	124768333	-	5	4	4821	8.74539	8.69708	11.126	10.3227	10.157	12.816	5.57369	5.5077	8.70724	5.40917	5.15497	6.73603
ENSG00000095585.12	BLNK	protein_coding	chr10	97951458	98031344	-	19	9	3706	0.907638	0.842373	1.87218	0.870531	0.777984	1.94921	4.2888	3.93206	9.60877	3.42674	3.21311	7.59395
ENSG00000095587.8	TLL2	protein_coding	chr10	98124363	98273675	-	23	3	8151	1.3737	1.34934	1.81604	1.54391	1.48506	1.84344	0.307892	0.266058	0.578605	0.225974	0.198509	0.462063
ENSG00000095596.7	CYP26A1	protein_coding	chr10	94833232	94837647	+	8	3	2485	1.19599	1.10165	1.27065	1.30747	1.2849	1.50258	2.99913	2.90543	3.34872	3.03312	2.71641	3.12603
ENSG00000095627.5	TDRD1	protein_coding	chr10	115939029	115992063	+	27	5	5256	0.219169	0.196463	0.267884	0.208957	0.204008	0.258887	1.14305	0.956032	1.13815	0.806935	0.740757	0.897469
ENSG00000095637.16	SORBS1	protein_coding	chr10	97071528	97321171	-	40	22	10819	36.1398	35.5317	67.7873	36.5661	35.9658	69.27	2.85621	2.83804	5.60822	2.77325	2.75977	5.67613
ENSG00000095739.7	BAMBI	protein_coding	chr10	28966271	28971868	+	2	2	2314	7.35778	7.2748	8.96641	8.17736	8.22762	10.1404	64.3823	65.58	80.8224	66.7791	67.9793	83.7774
ENSG00000095752.2	IL11	protein_coding	chr19	55875757	55881831	-	5	4	2671	1.12133	1.07888	1.68927	0.985133	0.883186	1.3067	1.89815	1.75256	2.79325	2.33193	2.22436	3.6239
ENSG00000095787.17	WAC	protein_coding	chr10	28821422	28912041	+	15	20	12188	32.9008	31.2865	128.666	34.2179	32.6064	120.376	19.8651	19.0366	83.6323	18.491	17.7936	78.9145
ENSG00000095906.12	NUBP2	protein_coding	chr16	1832902	1839192	+	6	17	4983	12.8581	12.848	49.2564	12.2325	12.2703	47.3306	18.2327	18.231	72.1555	20.9916	21.1266	81.1022
ENSG00000095932.5	C19orf77	protein_coding	chr19	3474405	3480540	-	4	4	1077	3.46549	3.43377	4.4472	3.90906	3.8718	5.11642	7.03768	6.80202	9.8446	6.0533	6.17377	7.91457
ENSG00000095970.12	TREM2	protein_coding	chr6	41126244	41130924	-	5	3	1095	9.27876	9.38634	9.99841	10.5314	10.4888	11.1626	0.162053	0.169067	0.190333	0.221331	0.230885	0.268795
ENSG00000096006.7	CRISP3	protein_coding	chr6	49695097	49712150	-	8	6	2247	0	0	0	0	0	0	2.65118	2.6953	2.98686	1.86594	1.92399	2.21704
ENSG00000096063.10	SRPK1	protein_coding	chr6	35800743	35889119	-	17	14	6692	11.943	11.6626	19.1691	12.1071	11.8251	19.9134	44.506	43.3101	73.1643	40.7936	39.5134	69.7618
ENSG00000096070.15	BRPF3	protein_coding	chr6	36164521	36200567	+	14	14	6618	18.2976	18.2991	27.3711	17.6049	17.5057	27.3617	15.3907	15.2415	19.4463	15.7287	15.9492	20.6203
ENSG00000096080.7	MRPS18A	protein_coding	chr6	43639040	43655528	-	5	3	1284	31.5801	31.6822	39.7585	29.8305	30.2306	37.0964	52.6738	53.7382	65.9297	55.7006	55.9392	68.3875
ENSG00000096088.12	PGC	protein_coding	chr6	41704449	41721847	-	12	4	2025	0.17066	0.0830118	0.12261	0.418068	0.247107	0.526292	10.891	10.9836	17.1844	12.2555	12.2851	18.9838
ENSG00000096092.5	TMEM14A	protein_coding	chr6	52535907	52551386	+	5	1	992	60.3847	57.3482	57.3482	65.4593	61.5401	61.5401	24.5065	23.2743	23.2743	24.6755	24.0586	24.0586
ENSG00000096093.10	EFHC1	protein_coding	chr6	52285106	52387892	+	15	6	7510	4.33172	4.23684	8.86135	4.35679	4.19769	7.4316	6.05559	5.9972	15.0165	6.12186	6.03938	14.5474
ENSG00000096384.15	HSP90AB1	protein_coding	chr6	44214824	44221620	+	13	3	2796	857.358	873.518	950.51	836.834	854.048	929.3	1484.19	1514.25	1647.87	1437.01	1467.54	1596.96
ENSG00000096433.6	ITPR3	protein_coding	chr6	33588142	33664351	+	59	2	9870	2.43463	2.40628	2.61093	2.37617	2.31763	2.52453	40.7343	39.5631	43.2174	41.8956	40.6227	44.3595
ENSG00000096654.11	ZNF184	protein_coding	chr6	27418522	27440897	-	7	2	3122	7.54933	7.37653	7.78722	7.57074	7.4339	7.95123	8.18468	8.07298	8.58746	8.89626	8.59197	9.14093
ENSG00000096696.9	DSP	protein_coding	chr6	7541808	7586950	+	24	3	10093	1.50429	1.54891	1.74836	1.26272	1.31028	1.44925	53.3669	54.8589	60.5274	51.2737	52.8133	58.2779
ENSG00000096717.7	SIRT1	protein_coding	chr10	69644427	69678147	+	11	6	4551	7.59364	7.67228	9.0977	7.79786	7.73329	9.04066	11.4467	11.4539	13.3453	10.9756	10.8883	12.8922
ENSG00000096746.13	HNRNPH3	protein_coding	chr10	70090931	70102948	+	6	12	5373	43.0895	42.799	152.005	44.7864	44.5431	144.489	62.754	62.5313	270.774	59.7571	59.8193	270.663
ENSG00000096872.11	IFT74	protein_coding	chr9	26947037	27062928	+	25	10	3755	2.66898	2.62205	4.75257	3.30263	3.21728	5.67453	5.0497	5.02878	8.74094	5.43448	5.2853	9.26039
ENSG00000097007.13	ABL1	protein_coding	chr9	133589333	133763062	+	12	3	6276	18.1861	18.6151	21.9543	18.3455	18.5583	22.3925	42.1527	43.0162	50.9032	43.4242	44.2474	52.666
ENSG00000097021.15	ACOT7	protein_coding	chr1	6324329	6454451	-	15	11	4892	49.535	50.7183	173.164	48.6333	49.6729	169.093	25.7436	26.3333	88.8567	26.5097	27.1527	91.5771
ENSG00000097033.10	SH3GLB1	protein_coding	chr1	87170259	87213867	+	12	4	6827	14.6091	14.9459	24.6422	15.0919	15.2944	25.1692	17.166	17.4285	45.7193	16.0921	16.2127	43.2783
ENSG00000097046.8	CDC7	protein_coding	chr1	91966408	91991321	+	13	6	3599	8.09793	7.90017	10.3056	8.76069	8.04424	9.68685	19.3134	18.6649	24.0101	16.9158	15.8477	21.6198
ENSG00000097096.8	SYDE2	protein_coding	chr1	85622556	85666729	-	7	2	6451	0.221427	0.227075	0.290784	0.19153	0.177298	0.290322	1.97658	1.86534	2.59845	1.84088	1.79102	2.35222
ENSG00000099203.2	TMED1	protein_coding	chr19	10943114	10946994	-	5	7	1513	9.22782	9.41201	10.8398	10.5255	10.4888	12.1408	28.9185	29.331	34.0049	30.5469	31.1136	36
ENSG00000099219.9	ERMP1	protein_coding	chr9	5765076	5833117	-	17	8	6528	15.1723	15.2774	19.8027	15.7656	15.838	20.8604	17.5949	17.7163	23.3393	16.4876	16.6222	22.1379
ENSG00000099246.12	RAB18	protein_coding	chr10	27793197	27831143	+	11	7	6106	18.8207	18.7677	74.2439	22.9033	22.8448	79.0041	10.1258	10.1699	48.1094	8.92665	8.88138	41.5636
ENSG00000099251.10	HSD17B7P2	pseudogene	chr10	38645305	38667433	+	11	5	1654	5.98961	4.51535	5.611	4.88326	3.54397	4.32172	5.7627	4.25324	5.07967	4.67424	3.34749	4.01334
ENSG00000099260.6	PALMD	protein_coding	chr1	100111499	100160097	+	8	4	8244	1.5175	1.55841	5.29178	1.43768	1.41917	4.68104	3.11491	3.14385	10.2849	3.02799	3.07284	10.5901
ENSG00000099282.5	TSPAN15	protein_coding	chr10	71211229	71267425	+	9	8	2646	25.2681	24.0958	42.7709	24.6794	23.522	40.0419	8.27747	8.29588	13.1755	8.53654	8.46553	14.0658
ENSG00000099284.9	H2AFY2	protein_coding	chr10	71812552	71872036	+	9	2	1980	12.3922	12.2496	12.2496	12.1684	11.9382	11.9382	12.8925	13.1834	13.1834	14.3456	14.403	14.403
ENSG00000099290.11	FAM21A	protein_coding	chr10	51827648	51893269	+	32	8	5162	4.04813	4.01011	6.42626	3.86074	3.74364	6.53467	4.41976	4.34462	7.10815	3.40859	3.43329	5.1344
ENSG00000099308.6	MAST3	protein_coding	chr19	18208603	18262502	+	29	5	6772	38.9236	38.6063	44.5044	38.0006	37.7725	43.472	6.10536	5.89704	6.99329	6.32734	6.11515	7.20146
ENSG00000099326.4	MZF1	protein_coding	chr19	59073298	59084942	-	5	8	6691	11.0874	10.6199	26.5386	9.92036	9.42657	24.2628	8.96013	8.15026	20.8985	9.88481	9.39334	23.6454
ENSG00000099330.4	OCEL1	protein_coding	chr19	17337013	17340028	+	4	15	1867	14.1912	13.364	27.736	15.0373	14.5751	26.1092	16.7957	16.1203	31.1687	16.6937	15.8977	31.6424
ENSG00000099331.9	MYO9B	protein_coding	chr19	17186591	17325346	+	41	19	9948	17.5549	16.9267	53.181	16.3326	15.7681	47.4011	24.677	24.5407	53.8023	26.5404	26.4916	58.317
ENSG00000099337.3	KCNK6	protein_coding	chr19	38810484	38819660	+	4	2	3113	0.532867	0.53999	0.754538	0.448354	0.436301	0.509455	9.79626	9.80394	11.8575	11.3588	11.4431	14.1015
ENSG00000099338.18	CATSPERG	protein_coding	chr19	38826415	38861589	+	26	17	9283	0.851278	0.682939	3.07357	0.756695	0.598079	2.01454	0.704539	0.595432	2.57472	0.670966	0.531076	2.22213
ENSG00000099341.7	PSMD8	protein_coding	chr19	38865176	38874464	+	7	9	3105	66.0602	66.791	161.076	59.6005	60.3187	145.394	80.9968	82.3132	210.138	83.1819	84.8105	215.158
ENSG00000099365.5	STX1B	protein_coding	chr16	31000577	31021949	-	9	5	5408	105.431	104.307	131.878	102.35	100.745	125.27	1.68748	1.6676	2.9072	1.72088	1.66894	2.58414
ENSG00000099377.9	HSD3B7	protein_coding	chr16	30996519	31000473	+	7	5	2504	3.60676	3.47169	4.12303	3.65508	3.3211	3.82191	15.4387	14.5859	17.2654	16.9573	15.9224	18.5225
ENSG00000099381.12	SETD1A	protein_coding	chr16	30968615	30996437	+	19	2	6903	10.4332	10.5547	10.5547	9.29749	9.3787	9.3787	18.9416	19.0871	19.2362	20.3316	20.3083	20.4
ENSG00000099399.5	MAGEB2	protein_coding	chrX	30233677	30238206	+	2	1	1610	0.04293	0.0447468	0.0447468	0	0	0	5.69976	5.7986	5.7986	5.73528	5.93576	5.93576
ENSG00000099622.9	CIRBP	protein_coding	chr19	1259384	1274879	+	9	46	6890	75.7414	74.3043	323.839	72.7834	71.5641	321.481	34.8164	33.3868	167.592	36.8636	35.6662	181.84
ENSG00000099624.3	ATP5D	protein_coding	chr19	1241749	1244824	+	3	8	2245	76.4241	76.3959	235.827	70.0488	69.9455	214.66	52.1336	52.1515	160.532	62.1816	62.3433	182.93
ENSG00000099625.8	C19orf26	protein_coding	chr19	1228286	1238026	-	9	5	4543	7.72872	7.46906	9.9854	7.53963	7.30633	11.61	2.15387	2.07244	3.85666	2.56601	2.46531	4.66853
ENSG00000099783.7	HNRNPM	protein_coding	chr19	8509651	8553998	+	17	16	5606	34.9573	34.539	97.0897	34.1946	33.9826	95.9703	86.4994	86.1528	257.245	87.7863	87.9365	243.987
ENSG00000099785.6	2015-03-02	protein_coding	chr19	8478154	8503901	+	7	9	2216	40.36	39.9007	63.1821	38.317	38.1079	61.5482	7.34411	7.02942	11.0748	9.61335	9.26395	15.272
ENSG00000099795.2	NDUFB7	protein_coding	chr19	14676890	14682874	-	3	2	531	161.794	161.451	161.452	145.429	147.053	147.057	144.699	146.23	146.232	156.323	156.548	156.548
ENSG00000099804.4	CDC34	protein_coding	chr19	531714	542097	+	8	9	2172	46.1312	44.7335	77.6836	43.0121	41.085	72.5954	42.5647	42.3734	76.5084	50.2233	49.8655	88.4469
ENSG00000099812.6	MISP	protein_coding	chr19	751126	764319	+	5	1	2872	0.296813	0.292651	0.292651	0.127469	0.132748	0.132748	14.299	14.3837	14.3837	15.5524	15.8188	15.8188
ENSG00000099814.11	CEP170B	protein_coding	chr14	105331617	105363107	+	19	5	7199	40.7497	40.3326	46.2924	38.4705	38.1238	42.8332	14.0605	13.9049	16.5681	14.833	14.6726	16.632
ENSG00000099817.7	POLR2E	protein_coding	chr19	1086594	1095598	-	8	10	3991	41.714	40.188	121.895	37.3339	35.805	108.308	50.5598	49.9714	141.599	53.9914	53.4905	153.499
ENSG00000099821.9	POLRMT	protein_coding	chr19	617223	633597	-	20	11	5701	16.7146	16.4784	34.1898	14.9903	14.8294	31.7481	22.126	21.7336	43.1599	24.4058	23.9338	45.8317
ENSG00000099822.2	HCN2	protein_coding	chr19	589893	617159	+	8	1	3408	70.902	72.3876	72.3876	68.9847	70.1281	70.1281	9.93015	9.92533	9.92533	10.1907	10.23	10.23
ENSG00000099840.9	IZUMO4	protein_coding	chr19	2096380	2099592	+	5	11	2818	7.44805	6.91961	16.0711	7.54302	7.17044	17.9732	3.26542	3.14397	7.82516	3.34553	3.04137	6.4525
ENSG00000099849.10	RASSF7	protein_coding	chr11	560404	564021	+	6	9	2492	12.4995	12.4407	19.0973	12.4687	12.3539	19.9284	13.4683	13.8284	21.1124	16.4359	16.7193	25.0797
ENSG00000099860.4	GADD45B	protein_coding	chr19	2476120	2478257	+	1	7	2138	46.7894	47.8598	74.8057	46.5856	47.4892	73.4249	24.3182	25.0738	39.1394	28.3279	29.2788	46.6029
ENSG00000099864.13	PALM	protein_coding	chr19	708953	748329	+	12	11	5215	70.0804	71.7016	139.363	69.0767	70.9225	138.376	5.65327	5.80157	11.5675	6.67353	6.83557	13.4324
ENSG00000099866.10	MADCAM1	protein_coding	chr19	489176	505347	+	6	4	2441	4.16233	3.97448	6.05253	3.77753	3.48491	5.22285	0.591945	0.530887	0.77832	0.516287	0.507503	0.725114
ENSG00000099875.10	MKNK2	protein_coding	chr19	2037470	2051243	-	10	15	5275	35.4606	35.2723	74.7393	33.343	32.8897	73.7998	41.6841	41.5679	90.9878	44.2215	44.108	95.3925
ENSG00000099889.9	ARVCF	protein_coding	chr22	19957419	20004331	-	22	12	5621	26.8509	25.5265	49.1171	23.5239	22.1283	42.853	6.06572	5.68365	12.6805	7.2996	6.71966	13.7958
ENSG00000099904.11	ZDHHC8	protein_coding	chr22	20116979	20135530	+	12	7	5542	20.8025	19.7937	42.4282	18.3476	17.4863	33.9702	17.8528	16.9934	44.4083	20.3043	19.5248	49.6259
ENSG00000099917.13	MED15	protein_coding	chr22	20850200	20941919	+	20	34	10374	11.8149	11.8496	40.7097	10.9353	10.8506	37.2676	15.5999	15.5892	52.1576	17.0776	17.2787	59.85
ENSG00000099937.6	SERPIND1	protein_coding	chr22	21128167	21142008	+	5	2	2553	1.09194	1.04409	1.1438	1.32642	1.34401	1.42327	46.6384	47.7038	50.1926	43.611	44.2458	46.3519
ENSG00000099940.7	SNAP29	protein_coding	chr22	21213271	21245506	+	6	3	4953	11.0893	11.1659	19.9694	10.1908	10.3241	16.8369	16.3573	16.6114	39.4639	17.0477	17.3548	42.1761
ENSG00000099942.8	CRKL	protein_coding	chr22	21271714	21308037	+	3	2	5325	49.7731	49.9945	49.9945	48.7908	49.048	49.048	55.4791	55.8289	55.8289	55.13	55.7152	55.7696
ENSG00000099953.5	MMP11	protein_coding	chr22	24110413	24126503	+	9	13	5176	0.427309	0.440754	1.08889	0.455317	0.395909	0.997106	4.2119	4.28688	9.91456	4.37329	4.40578	10.3214
ENSG00000099956.13	SMARCB1	protein_coding	chr22	24129150	24176703	+	9	7	2481	41.6672	41.7755	63.1361	41.6852	41.913	63.7402	58.0153	59.119	89.4076	56.423	57.0754	86.6352
ENSG00000099958.10	DERL3	protein_coding	chr22	24176690	24181315	-	4	10	3796	1.25635	1.1134	2.18794	1.2658	1.16128	1.81362	12.4612	11.3981	26.9557	13.2607	12.1348	27.7447
ENSG00000099960.8	SLC7A4	protein_coding	chr22	21383007	21387129	-	6	3	2447	4.73587	4.50449	4.76545	5.40461	5.09282	5.40188	0.145033	0.15131	0.160492	0.039617	0.0413272	0.129019
ENSG00000099968.13	BCL2L13	protein_coding	chr22	18111621	18213388	+	12	14	7527	14.4197	14.4046	36.9454	14.8708	14.8724	36.3155	13.0504	13.0671	34.4562	13.4138	13.4017	36.519
ENSG00000099994.10	SUSD2	protein_coding	chr22	24577227	24585078	+	12	2	5279	1.20018	1.23733	1.85615	1.41732	1.45795	2.21515	1.72872	1.76847	2.68842	1.91902	1.95397	2.96045
ENSG00000099995.14	SF3A1	protein_coding	chr22	30727977	30752936	-	14	11	6329	32.0159	32.8776	44.4514	31.485	32.2127	46.6448	44.8117	46.0323	89.8238	46.1011	47.2723	88.9554
ENSG00000099998.13	GGT5	protein_coding	chr22	24615622	24641110	-	13	6	2590	11.7864	11.5249	13.7354	10.4421	10.1201	12.7574	1.93794	1.89927	2.97294	1.9557	1.93275	2.18494
ENSG00000100029.13	PES1	protein_coding	chr22	30972612	31003070	-	17	13	4557	13.5343	13.617	28.8854	11.9249	11.9428	25.8207	34.9734	35.0419	75.6317	37.8134	37.8979	82.5328
ENSG00000100030.10	MAPK1	protein_coding	chr22	22108789	22221970	-	9	4	11336	45.9867	47.2741	101.423	46.2601	47.5786	92.0725	24.5984	25.1614	70.4256	23.1325	23.6583	67.2789
ENSG00000100033.12	PRODH	protein_coding	chr22	18900294	18924066	-	11	14	8772	13.4474	13.1568	51.4178	12.575	12.3867	49.2479	2.89852	2.78277	11.7241	3.14412	2.97723	12.3548
ENSG00000100034.9	PPM1F	protein_coding	chr22	22273793	22307209	-	13	10	7318	10.6978	10.8093	15.5744	9.8458	9.92786	14.7722	12.9381	13.2379	20.363	14.9064	15.0593	21.979
ENSG00000100036.11	SLC35E4	protein_coding	chr22	31031639	31065003	+	6	4	5531	2.36181	2.34888	4.90275	2.31662	2.36085	4.832	1.98912	1.92219	4.52754	1.74834	1.73696	3.60187
ENSG00000100038.15	TOP3B	protein_coding	chr22	22311397	22337213	-	16	18	6641	5.37382	5.35535	13.6583	4.94068	4.9515	14.2181	13.2455	13.2573	38.4547	13.824	13.9525	39.5503
ENSG00000100055.16	CYTH4	protein_coding	chr22	37678068	37711382	+	17	11	6157	1.24606	1.18179	2.57834	1.2821	1.2036	2.36494	1.22282	1.24997	3.17113	1.41706	1.35505	2.98497
ENSG00000100056.7	DGCR14	protein_coding	chr22	19117792	19132197	-	10	4	6003	6.62043	6.63658	13.877	7.18478	7.24412	14.0157	6.05557	5.85065	15.5967	6.82298	6.61213	18.5268
ENSG00000100060.13	MFNG	protein_coding	chr22	37865101	37882439	-	11	10	3042	1.7268	1.75251	2.75794	1.67732	1.67628	2.61512	13.1999	12.8409	21.5321	12.6835	12.375	20.5297
ENSG00000100065.10	CARD10	protein_coding	chr22	37886400	37915549	-	25	10	5652	0.839712	0.845508	1.42774	0.797508	0.792586	1.31187	9.76406	9.61108	15.3678	9.94813	9.63057	16.1084
ENSG00000100068.7	LRP5L	protein_coding	chr22	25747385	25801344	-	7	7	4555	0.682827	0.653732	1.56422	0.894133	0.86315	2.29296	2.50437	2.35148	5.9851	2.54861	2.42551	5.38309
ENSG00000100075.5	SLC25A1	protein_coding	chr22	19163095	19166343	-	7	5	2089	25.9066	24.2325	32.1484	22.1688	21.3986	28.5315	69.363	66.1994	87.7609	73.9485	70.6538	92.5102
ENSG00000100078.3	PLA2G3	protein_coding	chr22	31530795	31536593	-	7	1	2697	0.392955	0.391776	0.391776	0.186643	0.150196	0.150196	1.53208	1.4709	1.4709	1.73433	1.68734	1.68734
ENSG00000100083.14	GGA1	protein_coding	chr22	38004481	38029571	+	21	25	9370	13.644	13.2142	51.2512	12.5148	12.1836	48.9299	15.8375	15.0835	66.9814	16.8615	16.0191	72.189
ENSG00000100095.14	SEZ6L	protein_coding	chr22	26565440	26779562	+	18	10	7152	47.8435	48.9516	57.4071	47.4827	48.5392	56.4384	1.1165	1.13153	1.6191	1.03015	1.01099	1.424
ENSG00000100097.7	LGALS1	protein_coding	chr22	38071615	38075813	+	6	7	1099	119.954	121.622	238.789	115.507	116.496	228.606	364.377	368.668	724.717	405.722	411.826	808.82
ENSG00000100099.16	HPS4	protein_coding	chr22	26839389	26879803	-	17	19	10782	11.4063	11.2765	34.718	11.5932	11.4146	34.0721	11.5252	11.4157	35.3279	11.7672	11.7124	36.5485
ENSG00000100100.8	PIK3IP1	protein_coding	chr22	31677579	31688520	-	6	7	3805	26.2603	25.6929	40.4366	25.6409	25.3311	39.224	4.87675	4.71248	7.35563	4.76434	4.75074	7.23287
ENSG00000100104.8	SRRD	protein_coding	chr22	26879843	26890624	+	7	3	4319	12.4557	12.4824	17.4932	11.8404	11.7789	17.4821	11.0755	11.0711	27.5712	11.032	11.04	24.2131
ENSG00000100105.13	PATZ1	protein_coding	chr22	31721790	31742218	-	6	6	5693	11.2909	11.3891	19.3226	10.3452	10.5894	17.9092	13.9951	14.3174	25.7104	14.389	14.5927	25.8521
ENSG00000100109.12	TFIP11	protein_coding	chr22	26887191	26908471	-	16	16	5431	9.27333	9.33416	19.4548	9.53822	9.52513	19.5474	12.0471	12.1643	24.1559	11.5355	11.6378	25.8168
ENSG00000100116.12	GCAT	protein_coding	chr22	38203912	38213183	+	10	7	2102	16.0572	15.8114	23.7558	14.6733	14.544	20.9617	17.4385	16.6834	24.2455	16.4646	16.1771	23.0516
ENSG00000100129.13	EIF3L	protein_coding	chr22	38244875	38285414	+	15	13	4296	96.7792	99.4495	323.07	94.2128	96.6716	322.036	156.235	160.411	554.94	150.356	154.416	498.641
ENSG00000100138.9	NHP2L1	protein_coding	chr22	42069934	42086508	-	7	8	2780	101.554	104.168	189.216	98.7742	101.313	183.953	75.7028	77.2476	180.502	78.705	79.9382	197.261
ENSG00000100139.9	MICALL1	protein_coding	chr22	38301664	38338829	+	19	6	5968	5.09964	5.22693	8.71758	5.56684	5.6536	9.04872	9.85447	10.1081	16.5057	10.4204	10.6287	18.378
ENSG00000100146.12	SOX10	protein_coding	chr22	38366693	38383429	-	6	5	3710	50.1892	51.0769	67.7201	45.336	46.2755	61.2595	26.0535	26.5181	36.1321	27.0316	27.6466	37.159
ENSG00000100147.9	CCDC134	protein_coding	chr22	42196683	42222303	+	7	2	1270	3.99102	3.15776	3.15776	3.38708	2.47663	2.47663	6.52707	5.68503	5.96429	6.6028	5.89248	5.89248
ENSG00000100151.11	PICK1	protein_coding	chr22	38452318	38471708	+	13	15	4371	22.9284	22.4703	51.7439	21.3156	20.8899	49.9937	7.33641	6.95811	18.2177	8.32253	7.65803	19.4099
ENSG00000100162.10	CENPM	protein_coding	chr22	42334725	42343168	-	7	8	1778	0.336905	0.351163	0.898841	0.180164	0.134017	0.240961	18.2068	18.2808	36.1587	19.8193	19.6084	38.2493
ENSG00000100167.15	2015-09-03	protein_coding	chr22	42372276	42394225	+	11	8	5427	168.236	171.975	251.098	170.014	173.353	250.653	7.21677	7.30493	9.20741	7.44443	7.60275	9.90718
ENSG00000100191.4	SLC5A4	protein_coding	chr22	32614465	32651328	-	15	1	2028	0.590746	0.532858	0.532858	0.78977	0.787223	0.787223	1.81248	1.51274	1.51274	1.63722	1.22171	1.22171
ENSG00000100196.6	KDELR3	protein_coding	chr22	38864067	38879452	+	6	3	1929	1.00326	0.983471	1.28204	0.960779	0.963503	1.16913	29.4893	30.0663	37.8445	28.4069	28.7027	36.3915
ENSG00000100201.14	DDX17	protein_coding	chr22	38879445	38903665	-	15	12	9998	131.045	130.303	282.088	138.605	137.676	301.028	100.321	99.5844	219.666	93.6922	92.9423	206.954
ENSG00000100206.5	DMC1	protein_coding	chr22	38914954	38966291	-	15	6	3025	0.58645	0.60333	1.40476	0.355503	0.338715	0.740985	1.65088	1.38136	3.77598	1.29791	1.13664	3.00399
ENSG00000100207.14	TCF20	protein_coding	chr22	42556019	42739622	-	6	4	7548	10.9152	11.129	15.704	10.9645	11.2069	14.1918	15.2273	15.6656	18.1787	15.5695	15.823	19.1437
ENSG00000100209.5	HSCB	protein_coding	chr22	29138019	29153503	+	8	7	1462	6.68165	6.176	9.79394	6.41663	5.45994	8.04422	10.2647	9.67788	14.7434	10.5762	10.2719	15.8343
ENSG00000100211.6	CBY1	protein_coding	chr22	39052641	39069859	+	7	10	2348	10.9406	10.2786	22.6131	10.1541	9.71191	22.0654	10.5372	10.0584	23.5563	11.385	10.9397	23.9708
ENSG00000100216.4	TOMM22	protein_coding	chr22	39077953	39080818	+	4	2	1583	38.2918	38.1526	43.8489	37.9274	37.8571	44.5414	60.9643	61.4309	68.6289	62.9853	62.9253	69.8611
ENSG00000100219.12	XBP1	protein_coding	chr22	29190543	29196585	-	6	6	3028	18.9608	19.3747	33.2302	21.0219	21.5697	36.2705	152.559	155.091	277.986	147.599	150.013	272.374
ENSG00000100220.7	RTCB	protein_coding	chr22	32783569	32808242	-	14	7	2959	37.1631	37.9162	56.8791	38.2841	39.0318	58.2332	52.3101	53.4032	79.3638	55.5071	56.7669	84.8212
ENSG00000100221.6	JOSD1	protein_coding	chr22	39081548	39097561	-	6	10	4326	32.8171	33.0569	40.6138	32.7133	33.0047	40.9869	31.5319	31.7595	39.6622	32.0566	32.3359	41.9689
ENSG00000100225.13	FBXO7	protein_coding	chr22	32870663	32894818	+	10	10	8523	19.2411	19.4356	78.6541	19.1009	19.3074	77.1031	27.4526	28.0697	117.6	27.7304	28.2957	118.852
ENSG00000100227.13	POLDIP3	protein_coding	chr22	42979727	43010968	-	11	8	3650	45.7563	46.5676	50.478	45.1848	46.0961	50.0612	49.623	50.0606	55.3888	48.9495	49.5734	55.4644
ENSG00000100228.8	RAB36	protein_coding	chr22	23487513	23506537	+	11	3	4107	4.68411	4.52567	5.01493	4.72435	4.62407	4.96109	2.97506	2.74965	3.06111	2.7499	2.73318	3.03387
ENSG00000100234.11	TIMP3	protein_coding	chr22	33197687	33259030	+	5	1	4603	43.4905	44.0685	44.0685	42.277	42.8731	42.8731	84.5745	85.2872	85.2872	81.3315	82.2775	82.2775
ENSG00000100241.16	SBF1	protein_coding	chr22	50883429	50913454	-	38	9	9442	55.2894	54.5112	111.733	52.9418	52.2241	105.771	21.8032	21.2342	41.6959	23.3245	22.7195	45.9779
ENSG00000100258.13	LMF2	protein_coding	chr22	50941376	50946135	-	11	7	3071	26.8877	26.0785	37.0872	26.0026	25.1007	35.0708	43.2457	42.2237	57.5375	49.4105	48.374	64.197
ENSG00000100263.9	RHBDD3	protein_coding	chr22	29655841	29664198	-	9	7	3014	11.3437	9.95144	23.4797	10.499	9.44747	22.1183	14.0795	11.8019	27.8436	15.664	13.3875	31.6994
ENSG00000100271.12	TTLL1	protein_coding	chr22	43435522	43485434	-	12	5	1877	13.956	13.779	15.6875	14.0552	13.6596	15.5493	4.943	4.73423	5.38813	6.17191	6.0612	6.89967
ENSG00000100281.9	HMGXB4	protein_coding	chr22	35653445	35691800	+	13	9	6006	6.17982	5.75763	9.58811	5.72972	5.40756	8.93932	13.6161	13.1221	21.4329	12.2429	11.7107	20.5578
ENSG00000100285.9	NEFH	protein_coding	chr22	29876219	29887379	+	4	1	3783	111.943	112.085	112.085	107.176	107.967	107.967	7.79993	7.96971	7.96971	7.5148	7.46495	7.46495
ENSG00000100290.2	BIK	protein_coding	chr22	43506754	43525718	+	5	1	953	0.0241753	0.0251984	0.0251984	0	0	0	4.60179	4.49569	4.49569	5.0099	4.96088	4.96088
ENSG00000100292.12	HMOX1	protein_coding	chr22	35776354	35790207	+	6	4	2405	6.29384	6.52026	8.6804	5.4324	5.6177	7.41525	21.4182	22.1252	29.4884	22.9458	23.5789	31.3028
ENSG00000100294.8	MCAT	protein_coding	chr22	43528212	43539400	-	4	4	2388	10.1496	10.3176	17.1388	9.52407	9.42949	16.6332	8.93823	8.97067	13.9934	9.7024	9.65541	15.4372
ENSG00000100297.11	MCM5	protein_coding	chr22	35796056	35821423	+	21	10	7338	3.05179	3.08931	8.81408	2.81255	2.84782	8.58767	29.0945	29.7302	103.986	31.2112	31.6972	106.152
ENSG00000100299.13	ARSA	protein_coding	chr22	51061182	51066607	-	8	10	2938	22.2863	19.6412	39.2711	20.6768	18.2888	37.8136	13.9605	13.1604	22.3807	16.2506	15.0418	26.06
ENSG00000100300.13	TSPO	protein_coding	chr22	43547520	43559248	+	5	6	1455	14.8844	15.2172	25.3061	12.2503	12.2498	21.3921	50.4905	51.0761	88.6997	63.1961	64.2734	110.994
ENSG00000100302.6	RASD2	protein_coding	chr22	35936915	35950048	+	3	1	3412	27.0568	27.4698	27.4698	26.046	26.4331	26.4331	3.41761	3.37949	3.37949	4.13399	4.13462	4.13462
ENSG00000100304.12	TTLL12	protein_coding	chr22	43562628	43583139	-	16	4	4622	17.6008	17.8106	28.3656	17.5739	17.817	25.4671	32.6991	33.2903	49.2922	35.761	36.4023	53.9758
ENSG00000100311.12	PDGFB	protein_coding	chr22	39619364	39640756	-	10	4	3761	8.65574	8.79858	11.5061	7.87838	7.98285	8.72989	5.95831	6.00522	7.45644	6.1282	6.11714	8.57243
ENSG00000100314.3	CABP7	protein_coding	chr22	30116073	30127828	+	5	1	3259	7.95305	8.2012	8.2012	9.23235	9.43915	9.43915	0.443368	0.454441	0.454441	0.557741	0.57406	0.57406
ENSG00000100319.11	ZMAT5	protein_coding	chr22	30126945	30163000	-	7	3	3315	6.12291	6.03432	21.3835	5.77714	5.77914	20.4024	5.3223	5.15375	17.9795	6.24353	6.18511	21.6723
ENSG00000100321.10	SYNGR1	protein_coding	chr22	39745930	39781593	+	6	7	6945	147.417	151.54	252.519	143.861	148.026	246.259	6.70519	6.71358	22.7211	6.77343	6.72365	24.079
ENSG00000100324.9	TAB1	protein_coding	chr22	39795746	39833065	+	13	7	4456	17.7705	17.2507	26.4918	17.2068	16.6466	25.8385	11.9353	12.078	17.9463	13.2546	13.3558	19.9284
ENSG00000100325.10	ASCC2	protein_coding	chr22	30184597	30234271	-	28	23	5394	7.23122	7.07424	16.9758	6.06167	5.95042	14.6709	18.3003	17.9843	40.2413	19.2349	19.095	43.1429
ENSG00000100335.8	MIEF1	protein_coding	chr22	39895437	39914137	+	15	14	7555	10.6398	10.7436	15.8316	10.4697	10.6415	15.5788	17.0352	17.1843	26.2572	17.1783	17.3644	28.0081
ENSG00000100336.13	APOL4	protein_coding	chr22	36585172	36600886	-	7	15	4375	1.21646	1.22952	1.66938	1.53236	1.54679	2.2844	1.05455	1.08205	1.6115	0.974968	0.959269	1.40187
ENSG00000100342.16	APOL1	protein_coding	chr22	36649056	36663576	+	8	14	3519	4.54366	4.65406	6.51925	3.84272	3.79869	5.45422	20.6818	20.7802	30.3664	21.1641	21.4023	29.8099
ENSG00000100346.13	CACNA1I	protein_coding	chr22	39966758	40085742	+	42	7	10849	8.99563	9.0266	9.8977	9.15737	9.11484	10.0084	0.212631	0.197456	0.222104	0.236795	0.221383	0.242801
ENSG00000100348.5	TXN2	protein_coding	chr22	36863083	36878077	-	6	5	2050	52.2819	52.7373	84.1073	49.7015	49.8764	79.9662	53.4571	52.3648	92.4709	55.9195	55.6202	96.783
ENSG00000100350.10	FOXRED2	protein_coding	chr22	36883237	36903148	-	9	5	5577	16.8301	16.7716	21.146	16.5749	16.552	21.767	18.3816	18.2904	24.99	19.5163	19.3751	26.4801
ENSG00000100353.13	EIF3D	protein_coding	chr22	36906897	36925483	-	15	13	4070	31.4509	31.7789	75.3358	29.7731	29.753	73.5096	101.791	103.065	245.664	103.856	105.215	254.347
ENSG00000100354.16	TNRC6B	protein_coding	chr22	40440821	40731812	+	29	9	19998	4.41358	4.41304	5.29215	4.69675	4.68866	5.64145	2.70129	2.67008	4.21375	2.87707	2.84197	4.65295
ENSG00000100360.10	IFT27	protein_coding	chr22	37154246	37172300	-	7	13	8009	6.91547	6.95327	32.5956	6.83652	6.93811	35.063	4.30778	4.25976	17.9328	4.46344	4.42252	20.202
ENSG00000100362.8	PVALB	protein_coding	chr22	37196728	37215523	-	8	6	1050	175.031	174.411	323.353	175.812	175.08	324.428	14.2683	14.3821	26.6725	13.7336	14.0856	26.2316
ENSG00000100365.10	NCF4	protein_coding	chr22	37257030	37274057	+	10	4	1759	1.93848	1.99321	2.3449	1.95117	1.99133	2.31647	8.66129	8.64522	10.2561	8.72155	8.86808	10.4744
ENSG00000100368.9	CSF2RB	protein_coding	chr22	37309670	37336491	+	16	5	5061	0.386944	0.389085	0.46353	0.623898	0.612065	0.636986	3.87184	3.89831	4.2397	4.30027	4.22614	4.91913
ENSG00000100376.7	FAM118A	protein_coding	chr22	45704849	45737836	+	18	17	6512	5.52627	5.20699	16.8714	6.04345	5.5765	16.6258	8.90278	8.16717	27.326	8.70505	8.00543	27.6149
ENSG00000100379.13	KCTD17	protein_coding	chr22	37447779	37459430	+	9	8	2783	31.8971	29.2173	57.6831	27.5589	26.0201	50.1731	6.41259	5.88236	11.7692	6.13077	5.60508	11.24
ENSG00000100380.8	ST13	protein_coding	chr22	41220539	41253026	-	13	6	4147	82.5119	83.9886	171.504	91.0596	92.5604	170.605	103.973	105.424	255.492	98.287	100.201	243.879
ENSG00000100385.9	IL2RB	protein_coding	chr22	37521878	37571094	-	12	7	4700	0.0980387	0.102188	0.116772	0.0486825	0.0506982	0.0816167	0.792854	0.815914	1.16705	0.90755	0.93059	1.09749
ENSG00000100395.10	L3MBTL2	protein_coding	chr22	41601209	41627275	+	17	9	6451	14.0356	14.0563	26.617	13.7831	14.0768	27.9287	10.9793	11.1347	21.3493	11.0603	11.185	22.0288
ENSG00000100399.11	CHADL	protein_coding	chr22	41625517	41636938	-	6	3	2596	17.4923	17.4463	21.1483	15.151	14.5484	19.2952	0.478482	0.489002	0.501164	0.513468	0.525895	0.662148
ENSG00000100401.15	RANGAP1	protein_coding	chr22	41641615	41682255	-	20	8	5463	56.6214	56.6615	100.532	53.1916	53.4138	95.1611	44.3563	44.1217	78.8641	46.2178	46.1813	81.7621
ENSG00000100403.10	ZC3H7B	protein_coding	chr22	41697526	41756151	+	23	3	10525	35.7505	36.5402	67.6378	35.1179	35.9019	66.4128	20.9325	21.1198	39.0895	22.0873	22.2481	41.0565
ENSG00000100410.3	PHF5A	protein_coding	chr22	41855721	41864729	-	5	3	1235	20.5953	20.5919	23.4171	20.1944	20.1044	23.4883	44.1722	43.7712	50.7136	46.6464	46.3673	53.2152
ENSG00000100412.11	ACO2	protein_coding	chr22	41865129	41924993	+	20	7	4041	136.792	138.629	209.902	134.89	136.424	207.536	54.545	55.0207	83.6422	56.568	57.2582	87.5685
ENSG00000100413.12	POLR3H	protein_coding	chr22	41921808	41940610	-	8	9	6577	16.3449	16.5948	51.0881	16.5666	16.7091	51.2835	11.004	11.2189	30.4577	10.9921	11.2514	28.5936
ENSG00000100416.8	TRMU	protein_coding	chr22	46726772	46753237	+	11	19	8584	7.63318	7.59813	36.5205	6.82905	6.676	32.0845	10.0673	9.83747	50.8854	10.9066	10.6824	53.0259
ENSG00000100417.7	PMM1	protein_coding	chr22	41972898	41985894	-	7	9	5082	14.77	14.932	57.765	13.6105	13.6349	52.6939	9.28793	9.16429	35.5194	10.2055	10.069	39.1901
ENSG00000100418.7	DESI1	protein_coding	chr22	41994032	42017100	-	7	4	4972	31.505	31.6695	43.0814	28.7528	28.9322	39.0568	19.1143	18.5	28.2878	19.3271	19.0275	28.8114
ENSG00000100422.9	CERK	protein_coding	chr22	47080308	47134158	-	15	5	4938	43.4234	41.7597	46.7886	42.3373	41.2385	46.3058	25.2368	24.8026	28.4025	25.1731	24.9184	28.8602
ENSG00000100425.14	BRD1	protein_coding	chr22	50166931	50221160	-	16	10	5850	13.4887	13.2139	19.2104	13.7206	13.4415	21.4972	12.2676	12.1836	16.5045	12.1054	11.9625	16.9557
ENSG00000100426.6	ZBED4	protein_coding	chr22	50247490	50283726	+	2	1	6893	2.95133	3.03094	3.03094	3.21652	3.28057	3.28057	10.9115	11.1228	11.1228	10.6992	10.9483	10.9483
ENSG00000100427.11	MLC1	protein_coding	chr22	50497820	50524331	-	14	9	4297	80.8808	81.9397	98.2145	77.0023	78.0003	93.3858	1.15628	1.16324	1.31613	1.5454	1.53563	1.96061
ENSG00000100433.11	KCNK10	protein_coding	chr14	88649113	88793251	-	10	4	5592	4.69269	4.51768	5.58527	4.61953	4.61479	5.669	0.0453322	0.0472941	0.110379	0.030338	0.0316476	0.0366026
ENSG00000100439.6	ABHD4	protein_coding	chr14	23067146	23081265	+	8	10	3117	14.502	14.5687	19.3721	12.2295	12.239	15.7231	24.0079	24.699	32.2097	23.4037	23.8787	31.1226
ENSG00000100441.5	KHNYN	protein_coding	chr14	24898492	24910540	+	9	6	7515	11.282	11.2258	16.3504	11.655	11.5542	16.5651	23.2516	23.276	34.069	23.3746	23.4316	34.4977
ENSG00000100442.6	FKBP3	protein_coding	chr14	45584803	45604522	-	9	4	2262	60.0015	59.3346	104.157	66.6092	65.9752	115.786	54.9245	54.9865	94.3182	49.3286	49.4238	84.6048
ENSG00000100445.12	SDR39U1	protein_coding	chr14	24908972	24912111	-	3	22	3099	36.2277	35.9631	88.7619	33.5275	33.3241	81.5266	27.2802	27.5051	67.9919	26.8947	27.1175	65.6399
ENSG00000100448.3	CTSG	protein_coding	chr14	25042728	25045466	-	4	2	1374	0.0167679	0.0174775	0.027104	0.0333053	0.0346844	0.0537882	18.1544	18.8054	28.7833	20.902	21.2523	32.4345
ENSG00000100461.13	RBM23	protein_coding	chr14	23369854	23388393	-	18	33	6584	17.9862	16.8434	50.2087	16.8235	15.877	48.3622	16.6252	15.4929	45.5813	16.2369	15.2175	47.0277
ENSG00000100462.11	PRMT5	protein_coding	chr14	23389720	23398794	-	16	28	3467	21.5771	21.479	41.7273	20.7953	20.811	40.4593	65.4839	65.9226	131.693	64.8499	65.5492	122.495
ENSG00000100473.11	COCH	protein_coding	chr14	31343720	31364271	+	12	12	3623	4.29241	4.36138	6.66848	4.09239	3.97904	6.46203	12.0207	11.7744	20.3057	11.8871	11.6466	19.9624
ENSG00000100478.10	AP4S1	protein_coding	chr14	31494312	31562818	+	12	10	4393	4.82494	4.86514	16.1093	4.94804	4.88171	16.6749	1.36761	1.33047	3.91817	1.23027	1.24309	3.8907
ENSG00000100479.8	POLE2	protein_coding	chr14	50110273	50155140	-	21	11	2955	0.358646	0.284431	0.548721	0.642675	0.475757	0.991882	10.1914	9.20941	19.3217	9.16118	8.23053	18.0856
ENSG00000100483.9	VCPKMT	protein_coding	chr14	50575350	50583318	-	6	5	2055	8.84567	8.54225	11.4451	9.69789	9.29937	10.7435	6.25418	5.54676	6.7576	7.48889	6.79106	8.5655
ENSG00000100485.7	SOS2	protein_coding	chr14	50583847	50698276	-	25	6	6929	8.98089	9.03172	13.0148	10.5405	10.5918	14.8652	9.30723	9.294	13.7142	8.00978	8.06001	11.9607
ENSG00000100490.5	CDKL1	protein_coding	chr14	50796310	50883179	-	28	11	5961	2.25714	1.90147	7.60909	2.09961	1.6589	7.40158	0.952583	0.865146	5.63613	0.870062	0.72949	3.63047
ENSG00000100504.12	PYGL	protein_coding	chr14	51324609	51411454	-	21	7	4798	3.7214	3.61863	6.44883	3.64814	3.67008	8.11408	47.0223	47.2218	87.5855	45.1073	45.4579	82.9175
ENSG00000100505.9	TRIM9	protein_coding	chr14	51441980	51562779	-	14	6	8945	45.8876	43.4455	141.086	46.2936	44.0895	139.436	2.21049	2.1465	4.48053	1.76925	1.74105	3.55735
ENSG00000100519.7	PSMC6	protein_coding	chr14	53173890	53195305	+	12	18	7482	14.6604	14.6421	75.3091	16.1254	16.0861	82.5107	20.8063	20.9044	114.799	19.9502	19.9025	111.579
ENSG00000100522.4	GNPNAT1	protein_coding	chr14	53241912	53258386	-	7	5	4009	7.30424	7.13415	8.44279	8.86922	8.65399	9.83298	26.0011	25.7542	34.0045	23.8609	23.5918	30.0057
ENSG00000100526.15	CDKN3	protein_coding	chr14	54863567	54886936	+	11	10	1829	2.21699	2.17952	5.44052	1.90152	1.84997	4.80625	22.3006	22.0656	56.0986	22.6721	22.3791	55.0818
ENSG00000100528.7	CNIH1	protein_coding	chr14	54893654	54908149	-	7	7	1684	31.2888	31.3011	56.5675	31.8619	31.936	48.5308	52.6866	52.8937	98.6118	46.9891	47.261	89.5748
ENSG00000100532.7	CGRRF1	protein_coding	chr14	54976530	55005567	+	8	9	4104	5.98433	5.95672	19.1234	5.80382	5.80028	18.4206	2.89694	2.64211	8.55648	2.33853	2.29164	7.09467
ENSG00000100554.7	ATP6V1D	protein_coding	chr14	67761088	67826982	-	15	14	4251	48.9723	49.1354	161.636	49.61	49.5622	171.347	19.6489	19.8771	65.0901	19.327	19.4179	65.7511
ENSG00000100558.4	PLEK2	protein_coding	chr14	67853700	67878917	-	10	6	1603	0.0574899	0.0449422	0.0629428	0.128463	0.133783	0.179738	6.13581	6.08789	6.96138	5.98711	6.02476	6.43294
ENSG00000100564.4	PIGH	protein_coding	chr14	68048672	68067004	-	6	12	2915	13.7128	13.5682	35.0122	13.6107	13.5449	33.4707	9.61813	9.57167	26.1136	9.49474	9.53168	26.1302
ENSG00000100575.9	TIMM9	protein_coding	chr14	58875212	58894332	-	7	10	1500	16.6342	16.6338	34.5089	17.0233	16.9657	31.854	37.8219	38.5243	81.1111	32.6051	32.7485	69.7194
ENSG00000100577.14	GSTZ1	protein_coding	chr14	77787227	77797940	+	6	19	8477	1.97043	1.9575	15.204	1.80844	1.79618	13.0237	4.63515	4.49256	35.5176	4.68303	4.65257	36.7547
ENSG00000100583.4	SAMD15	protein_coding	chr14	77843032	77857840	+	4	2	2616	0.915927	0.807814	0.824197	0.533535	0.519192	0.95495	1.1919	1.22327	1.24808	0.917177	0.927777	0.946593
ENSG00000100592.11	DAAM1	protein_coding	chr14	59655364	59838123	+	28	14	10712	6.0996	6.01922	18.6527	6.15594	6.04825	18.9762	4.47502	4.37983	14.3165	4.38921	4.37808	15.132
ENSG00000100593.13	ISM2	protein_coding	chr14	77940740	77965210	-	7	11	4145	0.327939	0.33023	0.530395	0.259444	0.270187	0.407987	7.69361	7.66289	10.7697	7.48997	7.42294	10.5639
ENSG00000100599.11	RIN3	protein_coding	chr14	92980118	93155339	+	14	11	8683	1.41689	1.43537	3.35081	1.39662	1.40505	3.3609	3.37783	3.43264	8.14733	3.35498	3.41829	7.99776
ENSG00000100600.10	LGMN	protein_coding	chr14	93170152	93215047	-	18	19	3899	18.3474	17.7504	37.0284	17.6814	17.2279	36.1517	88.8055	88.5112	182.632	88.3587	88.7494	177.247
ENSG00000100603.9	SNW1	protein_coding	chr14	78183942	78227550	-	13	7	2432	33.2513	33.8192	41.9593	32.957	33.4594	44.6765	65.8448	67.1828	83.6689	64.0074	65.2423	80.5721
ENSG00000100604.8	CHGA	protein_coding	chr14	93389425	93401638	+	9	6	3102	134.001	135.91	208.865	133.191	135.503	207.267	0.359571	0.34103	0.766963	0.210949	0.220055	0.340782
ENSG00000100605.12	ITPK1	protein_coding	chr14	93403259	93582665	-	15	12	6783	77.3608	78.4964	181.241	71.8773	73.1286	168.086	15.476	15.6739	38.3676	16.2822	16.5229	41.1943
ENSG00000100612.9	DHRS7	protein_coding	chr14	60610838	60636574	-	9	11	3248	26.1318	26.247	63.6415	27.5443	27.6724	67.6368	20.503	20.8448	52.6558	18.8782	19.0393	47.3851
ENSG00000100614.13	PPM1A	protein_coding	chr14	60712470	60765805	+	13	9	11860	13.8215	14.0217	41.3245	16.5895	16.7139	42.447	7.09409	7.11122	34.0657	6.65154	6.69353	32.0292
ENSG00000100625.8	SIX4	protein_coding	chr14	61176246	61191066	-	6	3	6658	0.771661	0.800711	0.897077	0.53267	0.518937	0.569268	3.30864	3.34459	6.62945	3.30156	3.30359	6.91777
ENSG00000100626.12	GALNT16	protein_coding	chr14	69725994	69821183	+	20	10	8235	15.3846	15.1142	40.4789	14.7093	14.54	38.9041	2.18867	2.22558	6.0226	2.07777	2.04159	5.62418
ENSG00000100629.12	CEP128	protein_coding	chr14	80943330	81425861	-	33	17	9495	0.439187	0.429953	1.89474	0.472315	0.479324	1.48229	2.93678	2.85219	10.8813	2.81027	2.71591	10.0827
ENSG00000100632.6	ERH	protein_coding	chr14	69846848	69865344	-	4	4	1438	60.1292	59.7347	87.1099	63.6461	63.1331	97.9861	135.158	135.177	203.517	133.398	134.585	195.871
ENSG00000100647.7	KIAA0247	protein_coding	chr14	70078313	70181859	+	7	3	5830	24.1417	24.5125	27.7221	24.7411	25.1075	28.9047	8.10062	8.13819	9.09522	8.26841	8.40852	9.71503
ENSG00000100650.11	SRSF5	protein_coding	chr14	70193617	70238722	+	5	20	5357	108.792	108.048	439.498	104.055	103.648	410.559	91.9822	91.2977	410.579	93.4231	92.1231	423.161
ENSG00000100678.14	SLC8A3	protein_coding	chr14	70510934	70655787	-	11	10	8444	3.32326	3.34161	8.24067	3.13242	3.15207	7.41552	0.489343	0.485465	0.879697	0.479318	0.494022	0.890863
ENSG00000100711.9	ZFYVE21	protein_coding	chr14	104182067	104200005	+	5	12	8390	15.7676	15.8052	92.8856	14.7484	14.8223	85.8384	6.12141	6.16883	34.9288	6.78253	6.80412	38.6652
ENSG00000100714.11	MTHFD1	protein_coding	chr14	64854749	64926722	+	34	16	5924	13.9852	13.9407	29.8536	13.3716	13.4546	28.1928	59.5232	59.8626	128.202	57.3696	57.4989	123.596
ENSG00000100722.14	ZC3H14	protein_coding	chr14	89029253	89079853	+	23	26	6890	11.4828	11.1531	31.1222	11.3109	11.0357	33.1528	22.2004	21.7179	63.4182	20.1097	19.8072	59.4106
ENSG00000100726.10	TELO2	protein_coding	chr16	1543345	1560458	+	20	8	4239	16.3323	15.7715	31.4539	15.1027	14.2609	26.0728	23.4361	22.4415	45.4085	26.374	25.1328	51.3002
ENSG00000100731.11	PCNX	protein_coding	chr14	71374122	71582099	+	43	16	16715	6.71945	6.76677	14.3773	7.16333	7.19051	14.5162	7.23261	7.29563	21.18	6.80166	6.85781	19.8311
ENSG00000100764.9	PSMC1	protein_coding	chr14	90722839	90738968	+	9	7	3356	20.8354	21.2234	46.3201	23.5353	23.9915	50.2306	36.6423	37.2825	83.1167	36.8518	37.4634	79.3272
ENSG00000100767.11	PAPLN	protein_coding	chr14	73704205	73741348	+	28	13	7699	2.84884	2.82592	5.49481	2.48155	2.36456	4.82491	1.86361	1.82404	3.26986	1.70931	1.60578	3.0379
ENSG00000100784.5	RPS6KA5	protein_coding	chr14	91336799	91526980	-	20	7	5133	7.23086	7.2702	11.3892	7.61355	7.52957	11.4634	2.71128	2.71527	4.50664	2.68656	2.59074	4.51972
ENSG00000100796.13	SMEK1	protein_coding	chr14	91923955	91976898	-	17	14	5912	13.8383	13.6806	43.754	16.073	15.8559	44.9613	24.698	24.5099	72.8696	23.547	23.4132	70.8886
ENSG00000100802.10	C14orf93	protein_coding	chr14	23456110	23479375	-	13	22	3250	2.47404	2.42358	3.76396	2.45704	2.33883	3.69427	6.34914	6.22518	10.8024	7.12157	6.91558	10.8066
ENSG00000100813.10	ACIN1	protein_coding	chr14	23527773	23564823	-	20	23	9110	25.5731	25.1028	82.9299	24.551	24.1342	81.1982	50.04	49.2939	164.212	49.9825	49.2956	160.7
ENSG00000100815.8	TRIP11	protein_coding	chr14	92432335	92507240	-	24	5	10372	4.43367	4.46618	5.46549	5.22605	5.25635	5.57464	6.79692	6.82845	13.1009	6.11267	6.07429	14.2965
ENSG00000100823.7	APEX1	protein_coding	chr14	20923350	20925927	+	3	20	1882	66.6567	68.2399	88.0742	64.1075	65.4579	84.7928	182.068	186.604	246.141	174.054	178.532	236.577
ENSG00000100842.8	EFS	protein_coding	chr14	23825611	23834961	-	6	3	3237	25.9003	25.6017	28.1237	24.1672	23.8871	26.3925	11.2378	11.3811	12.3412	11.8446	11.8873	13.1885
ENSG00000100852.8	ARHGAP5	protein_coding	chr14	32545320	32628934	+	11	11	10887	17.6005	17.7917	40.599	22.0548	22.4165	46.8747	10.2405	10.4626	27.9576	8.68407	8.83137	21.7899
ENSG00000100867.10	DHRS2	protein_coding	chr14	24099324	24114848	+	5	9	7556	0.192094	0.184333	0.820266	0.118098	0.122988	0.512778	61.8479	61.966	223.3	62.6549	62.8903	227.441
ENSG00000100883.7	SRP54	protein_coding	chr14	35451163	35498773	+	19	13	3899	18.631	18.5387	35.9156	18.4971	18.2057	35.0324	37.1762	37.1572	74.3555	36.021	35.741	69.3412
ENSG00000100884.5	CPNE6	protein_coding	chr14	24540046	24547309	+	5	20	5996	24.9027	25.1996	76.1421	22.6938	22.8863	72.7473	0.00845556	0.0088215	0.0483834	0.0404198	0.0421647	0.147911
ENSG00000100889.7	PCK2	protein_coding	chr14	24563262	24579807	+	11	16	4189	2.61245	2.55677	5.13826	2.89492	2.92946	6.9294	37.7614	38.1582	75.1487	38.393	38.4691	74.8903
ENSG00000100906.6	NFKBIA	protein_coding	chr14	35870717	35873955	-	5	10	2373	39.1364	38.4246	62.1132	36.804	36.4502	59.0557	56.372	54.22	91.1063	55.9066	54.8361	91.1883
ENSG00000100908.9	EMC9	protein_coding	chr14	24608174	24610797	-	4	7	1582	18.2187	17.7146	33.1744	17.4137	16.2821	30.4167	16.5527	15.9818	30.3778	18.4296	17.3394	33.1592
ENSG00000100911.9	PSME2	protein_coding	chr14	24612574	24616779	-	5	16	3579	15.8036	15.6202	56.1358	15.1963	14.8868	53.0127	60.9344	60.1058	251.527	62.0147	61.4847	256.022
ENSG00000100918.8	REC8	protein_coding	chr14	24641062	24649463	+	12	13	3841	16.4831	15.7114	32.2187	15.4941	14.6716	30.2422	2.88411	2.54072	6.48059	2.97189	2.75133	6.53711
ENSG00000100934.10	SEC23A	protein_coding	chr14	39501123	39578850	-	24	15	9017	11.4186	11.5903	42.7946	11.6903	11.7833	37.2932	23.8598	24.2442	93.6709	22.8864	23.1454	92.0527
ENSG00000100938.13	GMPR2	protein_coding	chr14	24701628	24708448	+	10	30	3622	26.5121	26.4009	64.0632	25.7361	25.7031	65.8431	30.7109	30.6892	77.5585	30.4318	30.6496	76.8827
ENSG00000100941.4	PNN	protein_coding	chr14	39644387	39652422	+	7	6	4201	36.8044	37.9333	46.5456	34.6125	35.5693	42.4164	115.839	119.486	141.249	110.292	113.218	137.09
ENSG00000100949.10	RABGGTA	protein_coding	chr14	24734744	24740945	-	10	21	3545	12.0817	11.8546	25.6544	11.2177	11.2923	25.4539	11.5415	11.0487	23.0656	12.1691	11.8244	25.7587
ENSG00000100968.9	NFATC4	protein_coding	chr14	24834879	24848810	+	13	33	8437	4.02235	4.03034	12.6236	3.70996	3.74495	14.1576	7.09385	7.11561	27.976	7.77887	7.87494	28.478
ENSG00000100979.10	PLTP	protein_coding	chr20	44527399	44540794	-	17	6	2402	40.3808	40.67	56.0521	36.3597	36.3276	49.778	34.7425	34.3523	47.6477	38.6036	38.7649	53.6962
ENSG00000100982.7	PCIF1	protein_coding	chr20	44563267	44576662	+	16	2	2832	34.8759	34.0624	35.1164	32.8265	32.6796	33.8416	28.5095	28.0344	29.7342	31.0991	30.6293	32.5921
ENSG00000100983.5	GSS	protein_coding	chr20	33516236	33543620	-	13	3	2325	23.7922	23.6939	28.9571	21.3849	21.1738	25.9272	55.6496	55.4986	67.8391	58.812	57.8168	70.6859
ENSG00000100987.10	VSX1	protein_coding	chr20	25051521	25062996	-	8	10	3825	5.70406	4.4638	10.1135	5.77254	4.74695	10.8892	0.00662739	0.00691421	0.0133773	0.0633613	0.0528772	0.100192
ENSG00000100994.7	PYGB	protein_coding	chr20	25228705	25278650	+	21	3	4474	113.352	112.229	125.237	107.52	106.774	118.956	73.3579	72.785	83.4812	75.5619	75.0151	86.8428
ENSG00000101000.4	PROCR	protein_coding	chr20	33759876	33765165	+	4	1	1348	4.1361	3.91922	3.91922	4.00583	3.9419	3.9419	21.7391	22.1306	22.1306	21.6108	22.1123	22.1123
ENSG00000101003.8	GINS1	protein_coding	chr20	25388363	25433264	+	11	5	4190	1.24268	1.09468	1.51915	1.4635	1.47291	2.03203	18.1441	17.4776	24.464	17.5781	16.7259	23.8749
ENSG00000101004.10	NINL	protein_coding	chr20	25433341	25566153	-	24	7	6008	8.21784	7.69427	15.9966	6.94649	6.4528	15.9657	10.5357	9.7459	15.7559	11.1578	10.377	18.0632
ENSG00000101017.9	CD40	protein_coding	chr20	44746911	44758502	+	10	6	2368	4.05714	3.67108	5.58779	4.71529	4.07534	6.77746	5.96276	5.81875	8.65804	5.96681	5.64786	8.79532
ENSG00000101019.17	UQCC1	protein_coding	chr20	33890369	33999944	-	17	27	6916	18.4219	18.3752	61.1154	17.4749	17.6679	58.725	20.1046	19.8313	66.5223	20.1357	19.9704	70.1026
ENSG00000101049.10	SGK2	protein_coding	chr20	42187608	42216877	+	15	9	3465	4.50143	4.15136	7.55141	4.99877	4.42867	8.18124	0.863282	0.740359	1.26201	1.28698	0.98501	1.67663
ENSG00000101052.8	IFT52	protein_coding	chr20	42219571	42275936	+	15	9	2542	10.6857	10.3161	17.7283	10.4233	9.63626	15.8705	20.6528	20.4334	32.5403	21.4231	21.244	35.0715
ENSG00000101057.11	MYBL2	protein_coding	chr20	42295754	42345136	+	14	2	2682	0.0773124	0.0805843	0.0818973	0.170625	0.17769	0.186725	126.749	127.294	129.704	127.486	128.323	130.662
ENSG00000101082.9	SLA2	protein_coding	chr20	35240721	35274619	-	8	2	2757	0.183845	0.139364	0.139364	0.348565	0.276569	0.276569	1.48035	1.45808	1.54658	1.30101	1.32049	1.49487
ENSG00000101098.8	RIMS4	protein_coding	chr20	43380449	43438979	-	6	2	5206	33.1115	34.1253	34.4171	32.4181	33.6048	33.8338	2.99464	3.0328	3.03455	3.03063	3.09347	3.34307
ENSG00000101104.8	PABPC1L	protein_coding	chr20	43538703	43587676	+	16	17	4984	1.74735	1.65748	4.92014	1.77207	1.54424	5.69319	27.3843	25.0301	76.8981	29.964	27.8893	84.6235
ENSG00000101115.8	SALL4	protein_coding	chr20	50400581	50419059	-	7	5	4061	0.107792	0.112354	0.255918	0.259176	0.269908	0.562008	8.13365	7.94513	12.488	8.70122	8.72198	14.9793
ENSG00000101126.11	ADNP	protein_coding	chr20	49505585	49547958	-	7	5	7133	23.0359	23.4788	30.0983	22.6338	23.0097	28.9288	43.9827	44.8814	60.1931	38.7778	39.5054	52.3488
ENSG00000101132.5	PFDN4	protein_coding	chr20	52824386	52844591	+	8	5	1975	12.1203	11.2593	28.9578	14.215	13.6816	36.6504	31.9856	31.3747	96.8673	29.3037	28.431	88.087
ENSG00000101134.7	DOK5	protein_coding	chr20	53092136	53267710	+	10	4	2604	6.51182	6.58452	9.80714	6.73946	6.84465	10.3393	2.47267	2.35625	3.54618	1.85211	1.77673	2.78748
ENSG00000101138.7	CSTF1	protein_coding	chr20	54967427	54979518	+	6	7	2724	9.66729	9.64444	13.2729	10.1804	10.3133	14.3553	27.667	27.7284	39.0259	27.4031	27.5929	37.3706
ENSG00000101144.8	BMP7	protein_coding	chr20	55743804	55841685	-	13	9	5418	10.4182	10.4558	15.3104	10.1566	9.99658	13.5802	7.25215	7.21455	18.226	8.09199	7.97001	18.7929
ENSG00000101146.8	RAE1	protein_coding	chr20	55926066	55954267	+	12	9	5855	11.6278	11.6605	31.6068	10.9499	10.8783	29.4613	25.8477	25.7151	83.2824	25.018	24.8026	79.0706
ENSG00000101150.13	TPD52L2	protein_coding	chr20	62496596	62522898	+	8	8	4679	40.5191	39.7395	72.1237	40.1379	39.661	71.5461	69.315	69.63	140.933	71.0496	71.1071	143.922
ENSG00000101158.8	NELFCD	protein_coding	chr20	57556263	57570188	+	8	14	6298	17.4202	17.6312	57.2287	16.7264	16.5526	53.3496	47.7733	47.821	161.883	48.5484	48.5366	155.12
ENSG00000101160.9	CTSZ	protein_coding	chr20	57570240	57582302	-	6	4	2038	50.6792	50.8326	70.3548	50.4096	50.8833	70.5751	69.7927	71.4247	97.9794	71.6012	72.9926	100.291
ENSG00000101161.6	PRPF6	protein_coding	chr20	62612488	62664453	+	21	2	3044	64.8864	65.5024	65.5296	63.8918	64.6429	64.7398	89.3904	90.3919	90.4574	95.3743	96.3687	96.4882
ENSG00000101162.3	TUBB1	protein_coding	chr20	57594309	57601709	+	4	1	3496	0.0922618	0.0824283	0.0824283	0.0392691	0.040895	0.040895	2.74816	2.61745	2.61745	2.09359	2.10442	2.10442
ENSG00000101166.11	SLMO2	protein_coding	chr20	57608200	57617964	-	6	4	2977	10.378	10.2365	18.1843	12.2282	12.3503	23.1879	43.3935	43.4592	91.2029	42.1866	42.4876	85.7323
ENSG00000101180.11	HRH3	protein_coding	chr20	60790026	60795323	-	3	2	2671	22.4353	22.3778	23.0934	20.1652	20.0546	20.641	0.294213	0.306946	0.358691	0.326651	0.340752	0.34229
ENSG00000101181.13	MTG2	protein_coding	chr20	60758085	60778624	+	10	12	5209	9.09356	8.57943	30.723	8.35902	8.01897	24.8497	13.1834	12.5202	39.6119	14.3488	13.8471	45.6718
ENSG00000101182.10	PSMA7	protein_coding	chr20	60711791	60718496	-	7	6	1750	72.2901	71.1916	133.985	71.4795	71.4573	134.282	199.669	200.301	377.961	212.236	213.423	398.56
ENSG00000101187.11	SLCO4A1	protein_coding	chr20	61273797	61317137	+	14	9	4051	14.5082	13.1719	24.7969	13.838	12.5464	25.2711	25.2058	22.2947	43.9963	26.7245	24.04	45.524
ENSG00000101188.4	NTSR1	protein_coding	chr20	61340189	61394123	+	5	2	4237	0.500259	0.453417	0.588776	0.604826	0.562383	0.807735	1.86668	1.86008	2.36222	1.91049	1.84975	2.26143
ENSG00000101189.5	MRGBP	protein_coding	chr20	61427805	61431945	+	5	1	1636	12.8856	11.4493	11.4493	13.7061	12.4967	12.4967	50.6685	49.6121	49.6121	50.2935	48.7558	48.7558
ENSG00000101190.8	TCFL5	protein_coding	chr20	61472467	61493115	-	7	2	3436	16.7161	13.6565	19.1099	18.1461	15.4301	21.5911	17.9647	14.7012	20.5747	16.9706	13.8109	19.328
ENSG00000101191.12	DIDO1	protein_coding	chr20	61509090	61569304	-	17	9	13281	10.3443	10.4439	25.2799	10.2215	10.3415	26.0127	18.9861	19.0849	47.7763	19.0331	19.236	48.1513
ENSG00000101193.6	GID8	protein_coding	chr20	61569471	61576996	+	6	2	1791	22.1258	21.1984	24.8274	22.5997	21.0209	24.2727	62.1359	58.8003	68.4049	62.0981	59.0053	67.9762
ENSG00000101194.13	SLC17A9	protein_coding	chr20	61584052	61599949	+	13	7	4480	1.04396	0.959493	2.46943	1.23086	1.03716	2.00434	21.6831	20.2779	37.9287	24.6523	22.6183	41.8573
ENSG00000101198.10	NKAIN4	protein_coding	chr20	61872136	61904046	-	14	9	2668	11.9686	11.251	21.4303	11.2088	10.2172	19.9903	1.61524	1.3382	2.65534	2.04387	1.55406	3.01072
ENSG00000101203.12	COL20A1	protein_coding	chr20	61924538	61966203	+	34	10	10974	1.8307	1.56024	6.42174	1.79935	1.51776	7.40934	0.0877794	0.0578389	0.255122	0.0905471	0.0691141	0.295751
ENSG00000101204.11	CHRNA4	protein_coding	chr20	61975420	62009753	-	12	6	8732	5.64104	5.70927	10.6754	5.30618	5.35943	9.95606	0.0522556	0.0545171	0.119595	0.0555101	0.0579064	0.148192
ENSG00000101210.6	EEF1A2	protein_coding	chr20	62119366	62130505	-	8	2	1843	637.607	653.346	655.353	595.881	608.659	610.505	187.132	192.116	192.439	199.238	203.956	204.016
ENSG00000101213.5	PTK6	protein_coding	chr20	62159778	62168723	-	8	2	2523	0.146106	0.152289	0.153998	0.136033	0.141666	0.15326	3.68742	3.14469	3.62762	4.18818	3.68757	4.10464
ENSG00000101216.6	GMEB2	protein_coding	chr20	62218955	62258394	-	10	3	4707	8.37474	8.53019	9.58463	8.19566	8.29202	9.54838	11.6328	11.6811	13.0091	12.9494	13.1056	14.7822
ENSG00000101220.13	C20orf27	protein_coding	chr20	3734155	3749034	-	6	4	2415	20.3011	20.3449	36.6977	16.7224	16.6945	29.9598	37.3056	37.8798	65.2178	41.838	42.2098	74.0512
ENSG00000101222.8	SPEF1	protein_coding	chr20	3758151	3762095	-	5	3	1925	5.85253	5.66359	6.79092	5.77665	5.64449	6.64746	0.579423	0.439636	0.474465	0.491009	0.394004	0.451216
ENSG00000101224.13	CDC25B	protein_coding	chr20	3767578	3786762	+	17	9	4149	36.9936	35.6073	50.8007	34.71	33.2124	47.993	72.359	72.5073	101.711	74.4069	74.1091	106.828
ENSG00000101236.12	RNF24	protein_coding	chr20	3907956	3996229	-	8	4	7668	8.34972	8.42749	11.3144	8.54299	8.63569	10.349	16.7775	16.9725	22.4493	16.9757	17.3327	22.2817
ENSG00000101246.15	ARFRP1	protein_coding	chr20	62329996	62339377	-	9	12	7610	8.80693	8.08465	35.553	8.65621	8.04397	35.4065	10.0966	9.18863	39.3068	10.3694	9.4284	40.1071
ENSG00000101247.13	NDUFAF5	protein_coding	chr20	13765596	13799067	+	15	16	4056	7.91827	7.57842	28.0783	8.60286	8.18359	30.1169	6.39369	5.78362	28.5473	6.15453	5.66599	26.0039
ENSG00000101255.6	TRIB3	protein_coding	chr20	361261	378203	+	6	4	2948	4.53279	4.578	5.45033	3.29862	3.39479	4.00474	69.9698	72.4597	86.8081	74.2116	76.7634	91.8606
ENSG00000101265.11	RASSF2	protein_coding	chr20	4760669	4804291	-	15	3	5759	61.1842	61.4843	65.9968	62.0272	62.2371	67.0013	6.31653	6.27303	6.69386	6.27881	6.15037	6.62869
ENSG00000101266.12	CSNK2A1	protein_coding	chr20	459116	524465	-	18	9	5671	27.1423	27.3171	41.5437	29.07	29.2232	41.775	54.0476	54.2368	92.2722	53.4374	53.8851	92.4105
ENSG00000101276.10	SLC52A3	protein_coding	chr20	740724	749131	-	5	4	3445	3.55785	3.65963	4.66502	3.75258	3.82496	5.09376	0.448864	0.445259	0.571134	0.408032	0.410969	0.595663
ENSG00000101282.4	RSPO4	protein_coding	chr20	939095	982907	-	5	2	2710	1.49627	1.40895	1.41051	0.937183	0.923232	0.924255	1.03831	1.03445	1.12719	1.35935	1.35272	1.73322
ENSG00000101290.9	CDS2	protein_coding	chr20	5107432	5178533	+	14	8	11893	33.8138	34.2473	44.1289	34.1817	34.5892	44.6224	10.9388	11.0008	35.083	10.0158	10.1506	31.7243
ENSG00000101306.6	MYLK2	protein_coding	chr20	30407111	30422492	+	12	3	2976	0.673522	0.621333	1.07129	0.499748	0.488414	0.772267	1.37141	1.11973	1.34712	1.33557	1.22332	1.73296
ENSG00000101310.10	SEC23B	protein_coding	chr20	18488137	18542059	+	21	8	4039	18.8294	19.008	30.9686	20.0143	20.3239	30.3574	42.8919	43.6023	68.0798	42.297	42.9586	67.0846
ENSG00000101311.11	FERMT1	protein_coding	chr20	6055492	6104191	-	17	4	5359	0.937213	0.918622	1.24846	1.05886	1.03601	1.2051	6.29605	6.16386	8.84933	5.10582	5.08092	6.667
ENSG00000101327.4	PDYN	protein_coding	chr20	1959403	1974732	-	5	3	2648	3.1496	3.20128	3.35675	2.77369	2.79855	2.93454	0.0957317	0.0998748	0.106986	0.118982	0.124118	0.132955
ENSG00000101331.11	CCM2L	protein_coding	chr20	30598245	30619984	+	10	3	2596	3.0707	2.58087	3.27507	3.05841	2.91886	3.47289	0.556601	0.550127	0.775736	0.373432	0.350597	0.494378
ENSG00000101333.12	PLCB4	protein_coding	chr20	9049410	9461889	+	42	14	6900	18.4012	18.2821	27.8121	20.9674	20.9343	30.0275	4.48213	4.35415	6.85196	3.99714	3.76298	5.89775
ENSG00000101335.5	MYL9	protein_coding	chr20	35169887	35178228	+	4	2	1199	57.1654	58.6433	58.7602	52.3643	53.5786	53.5786	22.7281	23.3147	23.9216	22.7804	23.2155	23.6075
ENSG00000101336.8	HCK	protein_coding	chr20	30639991	30689659	+	15	9	3092	3.35304	3.27748	4.91491	3.7592	3.62971	5.36066	2.85308	2.86536	4.4242	2.39849	2.39573	3.67416
ENSG00000101337.11	TM9SF4	protein_coding	chr20	30697309	30755061	+	19	7	5415	32.1994	32.5776	45.572	31.5641	32.0041	45.8884	47.8205	48.4639	68.2527	47.6524	48.15	67.1856
ENSG00000101343.10	CRNKL1	protein_coding	chr20	20015012	20036690	-	15	7	4567	7.09788	7.09855	11.8172	8.02105	8.05577	11.2108	16.3522	16.5155	27.6907	15.6866	15.8102	26.2797
ENSG00000101347.7	SAMHD1	protein_coding	chr20	35518632	35580246	-	17	3	5214	13.1677	13.2045	14.813	13.2177	13.3125	15.5001	9.55843	9.70327	11.0874	9.97039	10.0032	11.1702
ENSG00000101349.12	PAK7	protein_coding	chr20	9518036	9819689	-	12	3	4929	13.8496	14.1678	15.3938	14.0376	14.1354	15.3208	0.0668588	0.0697523	0.076402	0.00983392	0.0102584	0.0112364
ENSG00000101350.6	KIF3B	protein_coding	chr20	30865467	30922814	+	9	2	6103	32.3068	33.3278	33.3278	32.4485	33.4289	33.4289	20.7641	21.3984	21.5788	20.8603	21.4376	21.4376
ENSG00000101363.8	MANBAL	protein_coding	chr20	35918041	35945663	+	6	6	2045	38.023	38.9745	63.4492	37.0568	38.1367	62.0451	33.3204	33.9735	52.7896	34.4159	34.9002	55.0199
ENSG00000101365.16	IDH3B	protein_coding	chr20	2639041	2644865	-	8	11	2299	69.0872	67.6761	114.398	69.0802	68.199	115.19	69.7973	69.5855	120.29	69.9873	69.8525	120.6
ENSG00000101367.8	MAPRE1	protein_coding	chr20	31407699	31438211	+	7	1	2623	28.8889	29.3608	29.3608	28.4461	29.1334	29.1334	121.143	124.309	124.309	115.681	118.429	118.429
ENSG00000101391.16	CDK5RAP1	protein_coding	chr20	31946645	31989367	-	14	17	4567	9.89768	9.21233	30.828	9.16333	8.72882	29.0186	18.1839	17.39	57.2363	17.2627	16.5963	48.3045
ENSG00000101400.5	SNTA1	protein_coding	chr20	31995761	32031698	-	8	1	2342	55.5221	55.9236	55.9236	51.3401	51.3191	51.3191	14.7747	14.8834	14.8834	15.9364	15.9658	15.9658
ENSG00000101407.8	TTI1	protein_coding	chr20	36611409	36661870	-	10	5	4122	9.41238	9.41456	11.3577	9.31995	9.39947	10.4979	32.8096	32.7602	35.6282	31.5793	31.6361	36.2047
ENSG00000101412.9	E2F1	protein_coding	chr20	32263489	32274210	-	7	1	2503	6.94947	6.93656	6.93656	5.91445	5.90231	5.90231	44.7545	43.585	43.585	48.3455	47.4428	47.4428
ENSG00000101413.7	RPRD1B	protein_coding	chr20	36661948	36720768	+	10	6	4243	10.4037	10.2554	11.9804	11.8799	11.6754	15.2082	26.8852	26.3908	36.9906	25.5038	24.9721	31.8021
ENSG00000101417.7	PXMP4	protein_coding	chr20	32294512	32308125	-	4	3	1771	4.34504	3.91873	4.56144	3.85007	3.33675	3.77498	5.25317	4.94292	5.28331	6.15814	5.66738	6.88253
ENSG00000101421.3	CHMP4B	protein_coding	chr20	32399110	32442172	+	5	1	1646	138.095	141.648	141.648	141.163	144.735	144.735	107.405	110.447	110.447	106.926	109.575	109.575
ENSG00000101438.3	SLC32A1	protein_coding	chr20	37353105	37358015	+	2	1	2574	18.4384	18.9855	18.9855	17.6806	18.1257	18.1257	0	0	0	0.112987	0.0883983	0.0883983
ENSG00000101443.13	WFDC2	protein_coding	chr20	44098346	44110172	+	5	7	1382	5.15129	4.51785	10.2687	5.01655	3.98286	9.62185	3.92536	3.52114	8.03011	5.10318	4.92101	11.1982
ENSG00000101447.9	FAM83D	protein_coding	chr20	37554955	37581703	+	4	1	2429	1.71679	1.69058	1.69058	1.58253	1.59901	1.59901	35.0242	35.9629	35.9629	36.0892	36.7519	36.7519
ENSG00000101452.10	DHX35	protein_coding	chr20	37590942	37668366	+	22	7	4930	4.39752	4.25727	7.43259	4.2652	4.12764	7.70157	8.46363	8.28275	13.4309	9.15353	8.90765	14.6433
ENSG00000101457.8	DNTTIP1	protein_coding	chr20	44420576	44440066	+	14	6	1883	18.7567	18.8108	28.3353	15.9181	15.6281	23.9683	34.7062	34.8598	52.1676	35.7293	35.8217	54.0763
ENSG00000101460.8	MAP1LC3A	protein_coding	chr20	33134658	33148149	+	6	4	1762	109.455	106.251	233.101	106.301	103.9	227.016	4.5175	4.14264	9.5161	5.35056	5.35196	11.9841
ENSG00000101463.5	SYNDIG1	protein_coding	chr20	24449835	24647252	+	5	2	2847	36.2297	36.2869	41.0111	34.5663	34.6417	39.1058	2.11025	2.15514	2.43286	2.48571	2.38877	2.75024
ENSG00000101464.6	PIGU	protein_coding	chr20	33148346	33264910	-	14	6	2755	12.2764	11.9243	21.4234	11.8515	11.8406	20.0463	25.497	25.5349	43.2956	26.3118	26.1812	45.6429
ENSG00000101473.12	ACOT8	protein_coding	chr20	44470360	44486045	-	6	12	4213	12.0254	12.0156	40.3727	11.5409	11.5323	39.1947	8.00266	7.92213	26.4363	9.11787	9.13942	31.4471
ENSG00000101474.7	APMAP	protein_coding	chr20	24943561	24973615	-	10	3	2454	130.846	131.569	146.149	125.527	127.006	140.303	131.201	134.239	144.222	135.884	139.133	146.825
ENSG00000101489.14	CELF4	protein_coding	chr18	34823010	35146000	-	15	24	6532	41.3589	40.3299	90.6342	42.3287	41.4038	95.2217	0.0116426	0.0121464	0.0312119	0.115019	0.0928913	0.235746
ENSG00000101493.6	ZNF516	protein_coding	chr18	74069644	74207146	-	8	6	8719	2.07428	2.10423	3.34403	2.19124	2.22185	3.26126	5.36709	5.25661	9.63553	5.6121	5.5818	11.1214
ENSG00000101544.4	ADNP2	protein_coding	chr18	77866915	77905406	+	7	5	5893	6.71664	6.77269	7.4006	6.80638	6.86581	7.50236	15.0344	15.1824	16.9024	13.9706	14.2433	16.1605
ENSG00000101557.10	USP14	protein_coding	chr18	158383	214629	+	17	9	5987	21.0881	21.1061	35.5268	21.9483	21.9894	38.0772	32.6409	32.5163	70.7658	29.15	29.378	61.5362
ENSG00000101605.8	MYOM1	protein_coding	chr18	3066805	3220106	-	38	7	6573	3.4981	3.43424	5.28148	3.47058	3.41853	4.74604	0.617064	0.607557	0.759875	0.523577	0.511562	0.648516
ENSG00000101608.8	MYL12A	protein_coding	chr18	3247479	3256234	+	7	12	3245	18.1331	18.3529	57.6467	17.7476	17.9317	56.6313	84.5799	84.581	272.074	82.14	82.4058	259.578
ENSG00000101638.9	ST8SIA5	protein_coding	chr18	44259081	44339220	-	11	9	4492	8.89354	8.74067	17.3042	8.13969	8.00461	15.889	0.361172	0.365028	0.779389	0.296742	0.309552	0.521597
ENSG00000101639.14	CEP192	protein_coding	chr18	12991361	13125051	+	47	15	9897	4.76518	4.73634	9.53137	4.93126	4.85375	10.843	9.88941	9.72951	16.8746	9.79762	9.64581	18.9692
ENSG00000101654.13	RNMT	protein_coding	chr18	13726659	13764557	+	13	11	6982	16.0996	16.4749	24.465	16.828	17.1971	25.8043	20.9747	21.4355	30.6277	19.3101	19.6657	27.9545
ENSG00000101665.4	SMAD7	protein_coding	chr18	46446223	46477081	-	7	8	3692	10.5773	10.7127	15.597	10.6719	10.7846	16.9783	8.04711	8.17331	15.2455	8.42867	8.56655	13.2625
ENSG00000101670.7	LIPG	protein_coding	chr18	47087069	47119272	+	11	6	5690	1.7168	1.75569	2.64194	1.76934	1.73791	2.47575	1.1717	1.17128	2.07697	0.843351	0.826439	1.4527
ENSG00000101751.6	POLI	protein_coding	chr18	51795774	51847636	+	14	16	9472	3.4904	3.48093	10.1225	3.7732	3.73825	10.8234	5.62823	5.54234	24.283	4.92032	4.83912	20.2388
ENSG00000101811.9	CSTF2	protein_coding	chrX	100075384	100095921	+	16	4	2151	12.3818	11.8117	12.6729	10.6798	9.72624	10.5488	32.633	32.4346	35.5842	31.7396	31.194	34.3423
ENSG00000101825.7	MXRA5	protein_coding	chrX	3226606	3264682	-	7	1	9793	0.308192	0.321234	0.321234	0.2757	0.26765	0.26765	6.2669	6.449	6.449	6.15482	6.35856	6.35856
ENSG00000101843.14	PSMD10	protein_coding	chrX	107327437	107334848	-	5	7	2459	28.8012	29.4927	55.2315	31.8321	32.5106	56.6197	28.4837	29.1571	59.3485	31.263	31.9854	60.9798
ENSG00000101844.13	ATG4A	protein_coding	chrX	107334898	107397901	+	14	10	2927	5.27373	5.1031	7.75008	5.85504	5.84511	7.81958	7.27496	7.21031	9.32277	7.72529	7.6269	10.7462
ENSG00000101846.6	STS	protein_coding	chrX	7137497	7272851	+	10	1	6521	10.7935	10.8931	10.8931	11.9193	11.9525	11.9525	12.9217	12.9983	12.9983	11.4136	11.4216	11.4216
ENSG00000101849.11	TBL1X	protein_coding	chrX	9431335	9687780	+	22	10	7006	7.35962	7.42429	9.43279	7.05104	7.02669	9.08673	18.5003	18.429	23.3749	17.7738	17.6786	22.7026
ENSG00000101850.8	GPR143	protein_coding	chrX	9693386	9754337	-	13	6	2487	2.19552	2.18222	3.18913	2.05163	2.04077	2.98153	0.652346	0.531702	0.847413	0.993986	0.945404	1.50038
ENSG00000101856.8	PGRMC1	protein_coding	chrX	118370216	118378429	+	3	2	1911	126.625	127.032	127.104	129.706	130.874	130.874	82.1115	82.5374	82.5374	83.1446	83.8762	83.8762
ENSG00000101871.10	MID1	protein_coding	chrX	10413350	10851773	-	14	10	7569	4.79106	4.85422	7.88094	4.85789	4.89534	6.41162	4.7692	4.78692	8.56501	4.58842	4.63953	8.82704
ENSG00000101882.5	NKAP	protein_coding	chrX	119059014	119077735	-	9	3	3515	5.84007	5.8481	13.3601	5.54607	5.40964	12.1219	14.3949	14.2279	31.7711	12.8108	12.7596	28.404
ENSG00000101883.4	RHOXF1	protein_coding	chrX	119243011	119249847	-	3	1	769	3.9547	3.52873	3.52873	2.76712	2.44789	2.44789	0.230752	0.137565	0.137565	0.0630317	0.0657527	0.0657527
ENSG00000101888.7	NXT2	protein_coding	chrX	108779010	108787919	+	7	4	3064	1.48882	1.47345	1.8747	2.24028	2.21639	3.32828	5.06333	5.06668	7.8972	5.10184	5.14055	8.13021
ENSG00000101901.6	ALG13	protein_coding	chrX	110909043	111003877	+	32	23	6764	5.45322	5.21537	20.6953	5.46311	5.07987	18.3046	9.62796	9.05934	35.2326	9.3195	8.75	37.8086
ENSG00000101911.8	PRPS2	protein_coding	chrX	12809474	12842341	+	7	5	2758	13.4743	13.7224	15.4078	15.4308	15.7674	18.1369	28.2267	28.825	38.4316	26.8456	27.5644	39.273
ENSG00000101928.8	MOSPD1	protein_coding	chrX	134021656	134049297	-	6	7	2675	3.26423	3.26772	3.94633	4.39653	4.43605	5.69138	12.8312	12.5066	19.3252	12.1496	11.8612	17.9674
ENSG00000101938.10	CHRDL1	protein_coding	chrX	109917084	110039286	-	12	7	4159	11.9544	12.1601	15.3118	12.648	12.7592	16.2746	4.01671	4.03157	5.67904	3.62458	3.62907	4.82351
ENSG00000101940.13	WDR13	protein_coding	chrX	48448430	48463581	+	8	14	4210	26.443	26.6437	68.2547	24.7938	24.9092	64.5843	18.4313	18.1108	45.0502	18.905	18.8023	47.0871
ENSG00000101945.12	SUV39H1	protein_coding	chrX	48553945	48567403	+	7	5	3368	4.8705	4.96967	5.85892	5.31258	5.4618	6.54186	15.3243	15.6263	18.9276	15.1617	15.3583	18.943
ENSG00000101955.10	SRPX	protein_coding	chrX	38008589	38080696	-	12	7	2105	9.54399	9.79958	11.4475	8.1849	8.36533	10.0957	22.7365	23.2054	27.9511	23.0844	23.6725	27.7554
ENSG00000101958.9	GLRA2	protein_coding	chrX	14547420	14749934	+	12	4	3713	4.91435	4.86362	7.28412	4.22737	4.19704	6.91309	0.0477911	0.0498594	0.0625048	0.00652726	0.00680903	0.0383641
ENSG00000101986.8	ABCD1	protein_coding	chrX	152990323	153010216	+	11	3	4233	1.61105	1.60548	1.94551	1.72971	1.74504	2.65621	12.5282	12.5018	15.5986	13.1169	13.1636	16.3654
ENSG00000101997.8	CCDC22	protein_coding	chrX	49091927	49106987	+	17	3	2516	12.5543	11.5871	12.6894	10.4764	9.68848	10.7459	16.2416	15.8198	17.1637	18.1864	17.3738	19.197
ENSG00000102001.8	CACNA1F	protein_coding	chrX	49061523	49089833	-	48	6	6928	0.897886	0.800702	1.69938	0.961072	0.811699	1.22255	0.245155	0.152695	0.39075	0.265865	0.215305	0.256603
ENSG00000102003.6	SYP	protein_coding	chrX	49044269	49056718	-	6	9	5203	230.329	236.91	509.557	231.939	238.296	513.818	1.70038	1.67739	3.67099	1.78868	1.79301	4.02996
ENSG00000102007.6	PLP2	protein_coding	chrX	49028273	49031588	+	5	2	1279	11.6727	10.5332	13.1522	10.698	9.76229	12.0361	198.854	196.914	235.285	197.353	192.728	231.285
ENSG00000102024.13	PLS3	protein_coding	chrX	114795501	114885181	+	22	11	4138	25.4722	26.0105	55.0025	26.5025	26.9953	50.3705	53.444	54.6705	119.05	47.1243	48.2055	96.6426
ENSG00000102032.8	RENBP	protein_coding	chrX	153200716	153210232	-	13	11	2146	4.48758	4.24108	7.19234	4.94719	4.56355	8.09151	4.71321	4.22706	7.23663	5.73706	5.43102	8.90323
ENSG00000102034.12	ELF4	protein_coding	chrX	129198849	129244691	-	10	3	4316	0.998218	1.0349	1.07242	0.895934	0.872301	0.906316	18.6188	18.965	19.7016	17.6658	17.8543	18.7252
ENSG00000102038.11	SMARCA1	protein_coding	chrX	128580480	128657477	-	25	4	4101	22.0054	20.8403	21.2736	23.4778	22.2478	22.695	29.9178	28.3944	28.8059	26.706	25.7258	26.3258
ENSG00000102048.11	ASB9	protein_coding	chrX	15253410	15288589	-	9	9	2363	0.253498	0.264226	0.512312	0.23239	0.231929	0.328695	5.61063	5.60723	10.1759	4.93329	4.77179	8.19524
ENSG00000102053.11	ZC3H12B	protein_coding	chrX	64708615	64727767	+	5	2	7256	3.9404	3.89534	3.8957	4.4084	4.36106	4.36148	0.576449	0.564948	0.565002	0.554455	0.508705	0.508754
ENSG00000102054.13	RBBP7	protein_coding	chrX	16857406	16888537	-	11	12	7392	18.473	18.6961	75.5888	17.7704	18.0549	73.7335	52.5582	53.7667	213.117	49.9861	51.159	207.261
ENSG00000102057.5	KCND1	protein_coding	chrX	48818639	48827976	-	6	3	5807	4.38009	4.3256	5.87982	3.68409	3.60274	4.85431	2.05609	2.07221	2.8036	2.22449	2.22039	3.06513
ENSG00000102078.11	SLC25A14	protein_coding	chrX	129473874	129507335	+	12	14	3202	11.3325	11.2796	29.8848	11.6262	11.5197	29.5741	5.52596	5.33562	14.7672	5.78266	5.66119	18.0323
ENSG00000102096.9	PIM2	protein_coding	chrX	48770459	48776301	-	6	3	2761	14.194	14.2728	19.7335	13.7649	13.8084	18.959	70.2191	70.2504	98.6409	73.9185	74.2983	105.117
ENSG00000102098.13	SCML2	protein_coding	chrX	18257434	18372847	-	16	4	4368	0.701511	0.604751	0.830742	1.17861	1.09103	1.22466	10.2084	9.89335	13.2993	9.32143	9.15081	11.988
ENSG00000102100.10	SLC35A2	protein_coding	chrX	48760459	48769235	-	6	9	3183	7.54217	7.45396	14.0157	7.64849	7.81546	14.1627	16.7167	16.6342	28.024	17.8551	17.6092	30.0415
ENSG00000102103.11	PQBP1	protein_coding	chrX	48755195	48760420	+	5	18	1903	45.0975	44.3687	86.8968	44.3067	43.1612	85.546	56.2277	55.3675	110.744	57.7429	56.6618	112.283
ENSG00000102109.7	PCSK1N	protein_coding	chrX	48689504	48694035	-	4	2	1347	234.239	238.929	306.881	199.489	203.008	260.756	11.0846	11.4858	14.7347	13.2964	13.6451	17.5047
ENSG00000102119.6	EMD	protein_coding	chrX	153607557	153609883	+	4	9	2020	34.6157	34.7135	64.9848	33.9927	33.8785	64.0913	60.9398	60.7885	112.822	68.3639	68.0234	127.874
ENSG00000102125.11	TAZ	protein_coding	chrX	153639854	153650065	+	7	25	4825	12.496	11.487	35.1963	12.1399	11.1857	36.7128	16.0347	15.32	47.2889	16.6159	16.018	48.3708
ENSG00000102144.9	PGK1	protein_coding	chrX	77320685	77384793	+	13	7	5725	109.743	112.092	397.533	108.984	111.245	407.291	350.673	357.779	1530.57	350.848	357.581	1502.64
ENSG00000102145.9	GATA1	protein_coding	chrX	48644962	48652716	+	6	2	1498	0.0461397	0.0320616	0.032083	0	0	0	19.3423	18.2197	18.6982	21.275	19.4931	19.6933
ENSG00000102158.15	MAGT1	protein_coding	chrX	77081861	77151090	-	11	3	4862	8.70956	8.8954	10.8799	9.57679	9.75279	11.7168	30.2769	30.7658	39.7446	27.6403	28.0067	34.8734
ENSG00000102172.11	SMS	protein_coding	chrX	21958691	22025798	+	13	5	2695	45.8046	44.8561	74.4702	47.6888	47.1612	75.3576	121.519	120.615	197.563	120.378	119.496	196.271
ENSG00000102174.7	PHEX	protein_coding	chrX	22050559	22269427	+	23	5	7132	0.329499	0.303038	0.450533	0.47802	0.481107	0.709857	0.476286	0.448692	0.549686	0.523317	0.514004	0.628704
ENSG00000102178.8	UBL4A	protein_coding	chrX	153712056	153715009	-	3	6	2630	32.465	33.3184	38.1814	34.2081	35.398	40.153	37.5716	38.7552	48.3423	39.4867	40.7587	48.3441
ENSG00000102181.15	CD99L2	protein_coding	chrX	149934810	150067289	-	13	8	5732	82.7952	85.0339	140.33	79.1127	81.1788	132.604	16.235	16.6654	27.0407	15.902	16.2798	26.4603
ENSG00000102189.12	EEA1	protein_coding	chr12	93164413	93323107	-	32	5	10150	3.79067	3.77365	4.85621	4.27408	4.23038	4.34819	5.65937	5.65937	7.90901	4.60598	4.54327	6.22437
ENSG00000102218.5	RP2	protein_coding	chrX	46696375	46741793	+	5	1	3803	1.79927	1.85015	1.85015	2.34644	2.33708	2.33708	7.15233	7.23933	7.23933	7.66646	7.8711	7.8711
ENSG00000102221.9	PHF16	protein_coding	chrX	46771711	46920641	+	13	4	5134	2.29763	2.28728	2.50649	2.46011	2.48307	2.76948	9.19386	8.96844	9.77338	9.08249	9.06092	9.807
ENSG00000102225.11	CDK16	protein_coding	chrX	47077259	47089396	+	15	22	6524	52.9963	53.6011	159.67	49.5493	50.2861	142.898	42.532	42.7268	140.215	42.9697	43.2087	143.455
ENSG00000102226.5	USP11	protein_coding	chrX	47092089	47107727	+	18	12	5269	123.853	125.408	225.117	116.15	117.522	209.682	37.5508	37.8106	70.8429	40.1598	40.3964	78.0299
ENSG00000102230.9	PCYT1B	protein_coding	chrX	24576204	24690794	-	9	4	5555	9.08707	9.20793	10.5293	9.13171	9.37256	11.0764	1.8208	1.89484	2.64158	1.63171	1.67939	2.31904
ENSG00000102241.7	HTATSF1	protein_coding	chrX	135579238	135594505	+	10	4	3136	57.0614	58.5421	66.2826	57.2311	58.4307	66.0973	63.7786	65.1642	74.5479	62.9309	64.3899	72.9071
ENSG00000102265.7	TIMP1	protein_coding	chrX	47441712	47446188	+	5	6	1790	33.1042	33.7405	68.4649	30.8827	31.5624	64.0523	194.301	199.799	405.055	204.433	210.843	425.969
ENSG00000102271.9	KLHL4	protein_coding	chrX	86772752	86925050	+	11	2	5818	5.3024	5.41535	8.783	5.08505	5.07854	8.2132	0.962925	0.968233	1.8421	1.13305	1.13851	1.776
ENSG00000102302.7	FGD1	protein_coding	chrX	54471887	54522599	-	18	1	4275	6.96832	6.87562	6.87562	6.90437	6.79451	6.79451	10.8218	10.8509	10.8509	10.5277	10.4853	10.4853
ENSG00000102312.16	PORCN	protein_coding	chrX	48367350	48379202	+	14	15	3011	15.0584	14.1166	26.2043	13.7619	13.2317	23.4985	8.28435	8.07196	15.537	9.85204	9.55524	18.186
ENSG00000102317.13	RBM3	protein_coding	chrX	48432837	48437454	+	4	12	3731	19.3526	17.9639	40.1159	21.1207	20.0729	45.431	72.7404	70.5368	181.368	73.8374	71.7801	180.133
ENSG00000102349.10	KLF8	protein_coding	chrX	56258854	56314322	+	5	5	9022	1.33812	1.32288	3.34351	1.55971	1.57411	3.40795	0.362461	0.360559	0.962709	0.359963	0.358688	0.862826
ENSG00000102359.5	SRPX2	protein_coding	chrX	99899215	99926296	+	11	2	2368	0.418362	0.395503	0.43805	0.541099	0.523254	0.579544	3.48987	3.54039	3.92126	3.3365	3.26701	3.61846
ENSG00000102362.11	SYTL4	protein_coding	chrX	99929488	99987110	-	17	8	7518	1.92759	1.92292	5.22804	2.0513	2.01579	5.30188	1.57467	1.46341	4.33558	1.7279	1.68815	4.37411
ENSG00000102383.9	ZDHHC15	protein_coding	chrX	74588262	74743337	-	13	4	6820	1.71949	1.63733	3.7759	1.83851	1.62465	3.0536	0.68764	0.612698	1.61072	0.483293	0.437429	1.14102
ENSG00000102384.9	CENPI	protein_coding	chrX	100353178	100418670	+	25	6	4340	0.260119	0.237928	0.323605	0.263603	0.236086	0.655151	7.66918	7.20281	12.0904	7.3098	6.88554	11.8725
ENSG00000102385.8	DRP2	protein_coding	chrX	100474758	100519486	+	24	5	8187	9.0164	8.9404	10.8689	8.44579	8.42587	10.3664	0.405621	0.403793	0.483666	0.458841	0.44468	0.537997
ENSG00000102390.6	PBDC1	protein_coding	chrX	75392771	75398039	+	6	2	1201	12.2965	12.5769	13.1433	11.5452	11.5074	12.1165	31.9774	31.7979	32.1787	31.2986	30.9867	31.844
ENSG00000102393.5	GLA	protein_coding	chrX	100652791	100662913	-	8	7	2065	8.32308	7.40774	15.4085	8.36561	7.54655	14.5026	34.839	33.3115	61.5729	36.4533	35.4804	66.1574
ENSG00000102401.15	ARMCX3	protein_coding	chrX	100877787	100882833	+	4	7	4239	29.2459	30.104	44.5397	35.6787	36.7681	55.3523	16.9178	17.3754	29.5151	16.2029	16.5266	29.2615
ENSG00000102409.9	BEX4	protein_coding	chrX	102470020	102472174	+	3	2	1328	220.051	222.745	225.677	235.32	238.712	242.204	30.6182	30.6887	31.1908	31.9371	31.6595	32.4821
ENSG00000102452.11	NALCN	protein_coding	chr13	101706130	102068843	-	48	6	8949	12.5558	12.4297	17.2474	12.8223	12.7435	18.1906	1.27471	1.2028	2.66189	1.14828	1.11874	2.35688
ENSG00000102468.6	HTR2A	protein_coding	chr13	47405685	47471169	-	4	3	5392	6.78098	6.74729	8.80174	7.44304	7.3535	8.91233	0.13634	0.122621	0.142111	0.0809055	0.0843981	0.112563
ENSG00000102471.9	NDFIP2	protein_coding	chr13	80055287	80130210	+	9	4	4806	21.9701	22.4601	30.4671	28.6272	29.3167	33.8372	8.49212	8.51296	20.8915	8.31558	8.36418	18.9244
ENSG00000102524.7	TNFSF13B	protein_coding	chr13	108903588	108960832	+	6	6	3059	1.19752	1.09119	1.68979	1.21173	1.09053	1.53392	2.86728	2.90492	6.20924	2.40059	2.40505	5.96536
ENSG00000102543.10	CDADC1	protein_coding	chr13	49822047	49867618	+	11	8	3874	6.20878	6.18639	12.1719	6.31377	6.35377	13.8116	3.21943	2.84676	9.08658	3.35321	3.19777	10.0075
ENSG00000102554.9	KLF5	protein_coding	chr13	73629114	73651676	+	7	5	3889	0.936019	0.957107	1.86475	1.15904	1.20703	1.80388	12.7238	13.0568	25.7478	11.7159	11.8966	23.8726
ENSG00000102572.10	STK24	protein_coding	chr13	99102455	99230194	-	16	8	6778	20.0343	20.4428	55.8004	19.8021	20.2283	54.1791	33.3122	33.8877	107.344	33.6861	34.3458	111.811
ENSG00000102575.6	ACP5	protein_coding	chr19	11685475	11689823	-	6	12	2814	0.695922	0.716839	1.45884	0.609829	0.609676	1.3951	4.77448	4.88712	10.0542	5.11585	5.19295	10.6196
ENSG00000102678.6	FGF9	protein_coding	chr13	22245522	22278637	+	4	3	4539	6.33461	5.96253	12.5822	7.01697	6.63556	14.5613	0.770713	0.734149	1.50789	0.512586	0.506864	1.07845
ENSG00000102699.5	PARP4	protein_coding	chr13	24995064	25086948	-	34	3	6080	5.46042	5.41897	6.01888	5.27236	5.17322	6.06039	26.0127	26.0162	29.6742	26.9543	26.9411	30.5896
ENSG00000102738.6	MRPS31	protein_coding	chr13	41303432	41345309	-	9	4	1963	13.6263	12.7961	20.8949	12.9732	12.0415	19.8637	21.0495	20.3303	31.6127	18.4577	17.6445	27.804
ENSG00000102743.10	SLC25A15	protein_coding	chr13	41363548	41384247	+	8	4	1837	1.58025	1.4249	1.7121	1.89324	1.85489	2.24441	11.2466	10.8264	12.7138	10.5809	10.0329	11.7691
ENSG00000102753.5	KPNA3	protein_coding	chr13	50273447	50367057	-	17	2	4470	15.0553	15.2734	15.9072	18.0384	18.2416	19.7328	17.5974	17.8324	18.141	17.9951	18.1215	19.3056
ENSG00000102755.6	FLT1	protein_coding	chr13	28874489	29069265	-	35	5	8072	11.0343	10.8468	13.7395	10.9302	10.8573	14.6037	1.25304	1.23191	2.54164	1.39914	1.36871	2.74844
ENSG00000102760.12	RGCC	protein_coding	chr13	42031695	42045018	+	6	2	1032	121.692	120.908	130.726	116.754	116.994	125.768	3.14416	3.20335	4.12965	3.24082	3.30723	3.55527
ENSG00000102796.6	DHRS12	protein_coding	chr13	52342129	52378293	-	14	9	3525	3.84965	3.08607	8.70217	4.51124	3.75167	10.9031	2.43789	2.23579	6.51451	2.55764	2.10862	6.81865
ENSG00000102802.5	MEDAG	protein_coding	chr13	31480328	31499709	+	5	2	2374	1.14516	1.13293	1.13293	1.18548	1.1342	1.1342	0.480514	0.479029	0.479029	0.387935	0.351434	0.351434
ENSG00000102804.10	TSC22D1	protein_coding	chr13	45007655	45151283	-	10	11	7159	133.108	134.81	494.801	138.528	140.992	524.227	35.5194	35.7895	128.367	34.6253	34.764	127.237
ENSG00000102805.9	CLN5	protein_coding	chr13	77564795	77576652	+	4	2	4221	6.03678	5.95659	9.75912	6.51568	6.48063	12.0058	6.37197	6.33446	12.4482	6.31013	6.23513	13.5597
ENSG00000102854.10	MSLN	protein_coding	chr16	810762	818865	+	17	8	2560	0.728971	0.619114	0.866272	0.723962	0.623628	0.756988	7.38708	7.15925	11.5402	7.78193	7.29818	9.44827
ENSG00000102858.8	MGRN1	protein_coding	chr16	4666494	4740975	+	24	17	8311	26.2658	26.6348	58.0869	23.4617	23.682	52.0271	14.1008	14.0301	33.3552	15.9948	16.1377	38.2071
ENSG00000102870.4	ZNF629	protein_coding	chr16	30789778	30798523	-	3	1	6079	10.1154	10.4091	10.4091	9.93671	10.1835	10.1835	12.0098	12.2206	12.2206	12.7338	13.0589	13.0589
ENSG00000102871.11	TRADD	protein_coding	chr16	67188083	67194201	-	4	5	2567	4.77476	4.80844	8.92758	4.48346	4.38134	7.21561	10.6159	10.3541	15.2268	12.0659	11.6315	17.9758
ENSG00000102879.11	CORO1A	protein_coding	chr16	30194148	30200397	+	8	17	4871	17.5146	17.6889	52.0432	15.9193	16.1773	45.6912	35.2014	35.8235	98.9836	37.6845	38.377	107.491
ENSG00000102882.7	MAPK3	protein_coding	chr16	30125426	30134827	-	10	16	3669	74.8315	76.0283	187.859	69.3969	70.7636	176.539	28.0789	28.2129	74.6985	31.0658	31.4422	80.0147
ENSG00000102886.10	GDPD3	protein_coding	chr16	30116131	30125177	-	8	5	1891	5.6288	4.01294	5.5778	5.60222	4.24648	6.24999	9.24978	7.44036	10.4246	9.07397	7.58057	10.7724
ENSG00000102890.10	ELMO3	protein_coding	chr16	67233014	67237932	+	20	5	2575	2.86311	2.35945	2.60439	1.88378	1.45282	1.63386	6.45804	5.12504	5.89632	6.91776	5.67493	6.41794
ENSG00000102897.5	LYRM1	protein_coding	chr16	20911190	20936328	+	10	11	3593	9.4452	9.04957	26.6102	10.7049	10.538	31.2309	9.95506	9.96634	28.1203	9.47034	9.38661	27.6349
ENSG00000102898.7	NUTF2	protein_coding	chr16	67880635	67906470	+	5	8	3895	26.2924	26.3138	66.6422	25.8238	25.8837	61.9653	41.8613	41.6971	143.27	43.0954	42.8527	149.741
ENSG00000102900.8	NUP93	protein_coding	chr16	56764017	56878797	+	29	21	5735	8.35594	8.28665	24.3024	8.81718	8.76677	24.6494	35.0874	35.1211	86.9694	34.8935	34.9803	89.5374
ENSG00000102901.8	CENPT	protein_coding	chr16	67862060	67881714	-	14	36	5539	24.445	24.6558	65.9666	24.2729	24.5294	65.5881	21.24	21.2998	56.5675	22.3149	22.3653	60.1037
ENSG00000102904.10	TSNAXIP1	protein_coding	chr16	67840668	67866051	+	16	16	3852	3.09222	2.79915	5.84247	2.94623	2.66613	5.29799	0.309304	0.233435	0.382844	0.44042	0.426616	0.738598
ENSG00000102910.9	LONP2	protein_coding	chr16	48278207	48397033	+	17	9	9957	18.3998	18.5466	42.4775	18.7559	18.9773	40.9287	17.9666	18.2634	42.1019	18.2212	18.4212	41.9335
ENSG00000102924.7	CBLN1	protein_coding	chr16	49311828	49315742	-	2	3	2594	147.134	149.815	206.041	145.047	146.689	196.068	2.42357	2.48768	2.65012	2.48523	2.56328	3.83387
ENSG00000102934.5	PLLP	protein_coding	chr16	57290004	57318599	-	5	3	1620	114.939	116.809	124.965	103.543	105.359	112.611	11.0318	11.1828	11.9421	11.5045	11.5954	12.3826
ENSG00000102967.7	DHODH	protein_coding	chr16	72042487	72058954	+	12	9	4312	1.96623	1.87123	5.33131	1.70332	1.6136	3.58092	6.73721	6.32958	14.3502	6.81208	6.40843	14.1925
ENSG00000102974.10	CTCF	protein_coding	chr16	67596310	67673086	+	11	3	4301	21.4	21.5239	23.502	23.7852	24.0165	26.4222	34.9863	35.0924	38.4462	32.9923	33.0411	36.2961
ENSG00000102977.9	ACD	protein_coding	chr16	67691415	67694713	-	2	13	3218	17.8915	17.9322	35.4934	15.3368	15.5572	31.1308	19.6859	19.6256	41.9656	20.7111	20.9373	46.3506
ENSG00000102981.5	PARD6A	protein_coding	chr16	67694849	67696681	+	3	4	1488	31.0285	30.9053	36.5447	29.7081	29.7052	35.0835	5.17898	5.27871	6.24335	4.1533	4.1287	4.87871
ENSG00000102996.4	MMP15	protein_coding	chr16	58059470	58080805	+	10	2	4419	7.02278	7.20586	7.89535	6.50334	6.6486	6.91297	20.9097	21.4196	22.2714	21.4551	22.0781	23.0318
ENSG00000103005.7	USB1	protein_coding	chr16	58033450	58055522	+	10	15	7298	7.34296	7.36415	23.1023	7.05736	7.03287	23.4945	12.3136	12.2667	41.5054	11.8157	11.6952	39.0031
ENSG00000103024.3	NME3	protein_coding	chr16	1820287	1821731	-	1	11	1445	44.3562	45.5853	72.8977	41.4546	42.0003	68.4331	24.3323	24.7264	39.5195	27.0199	27.6089	43.9553
ENSG00000103035.6	PSMD7	protein_coding	chr16	74330673	74340186	+	8	7	2740	46.8686	47.3534	79.9177	49.2855	49.8913	84.823	91.768	92.5929	156.417	90.5655	91.301	155.261
ENSG00000103037.7	SETD6	protein_coding	chr16	58549383	58554431	+	5	13	4424	8.92609	7.95766	20.4563	8.40444	7.76678	20.4617	9.58065	9.08064	23.2152	10.195	9.65788	25.5959
ENSG00000103042.4	SLC38A7	protein_coding	chr16	58699013	58719008	-	12	16	6991	5.21683	5.19716	10.279	4.87661	4.89447	8.8305	5.39557	5.41724	10.1734	6.00433	6.00315	11.2938
ENSG00000103043.10	VAC14	protein_coding	chr16	70721342	70835064	-	20	12	8278	9.91644	9.95318	29.4023	8.91958	8.84849	23.8302	13.5231	13.4982	38.226	14.176	14.2016	40.2786
ENSG00000103044.6	HAS3	protein_coding	chr16	69139467	69152622	+	8	5	5289	0.588065	0.612952	0.768224	0.631611	0.639743	0.801801	3.30232	3.36524	4.412	3.59709	3.63287	5.12502
ENSG00000103051.14	COG4	protein_coding	chr16	70514471	70557468	-	20	14	4786	18.2012	18.2891	32.3753	18.1191	18.3217	31.2054	27.3413	27.5686	46.525	29.2692	29.397	50.3372
ENSG00000103056.7	SMPD3	protein_coding	chr16	68392231	68482591	-	11	12	7163	6.29128	6.33291	10.248	6.50679	6.52007	9.8687	1.19972	1.11134	2.00035	1.35338	1.34475	2.30132
ENSG00000103061.7	SLC7A6OS	protein_coding	chr16	68318406	68344849	-	5	5	5187	7.009	7.02321	10.85	7.16375	7.2169	11.1224	11.8172	11.6403	17.993	10.639	10.6743	15.9295
ENSG00000103064.9	SLC7A6	protein_coding	chr16	68298433	68335722	+	14	15	7570	7.96173	7.86724	11.2677	7.89795	7.66783	12.1961	19.7206	19.6657	27.7204	18.7066	18.4922	29.5291
ENSG00000103066.8	PLA2G15	protein_coding	chr16	68279207	68294961	+	6	12	4460	10.2436	10.4887	18.746	9.58325	9.75032	17.2645	11.9076	12.2391	21.7124	12.9493	13.2588	23.8373
ENSG00000103089.4	FA2H	protein_coding	chr16	74746853	74808729	-	8	5	3010	39.641	39.7868	49.8429	35.4082	35.9481	48.662	5.97951	5.79898	8.85318	6.19983	6.23229	7.79353
ENSG00000103091.10	WDR59	protein_coding	chr16	74907468	75034071	-	34	23	7218	11.1972	11.0456	33.6777	10.2897	9.88054	28.3222	19.295	18.7634	50.2194	20.1696	19.7583	56.5993
ENSG00000103126.10	AXIN1	protein_coding	chr16	337440	402673	-	9	5	7487	7.6161	7.5856	14.748	8.14136	8.21431	16.0727	13.7025	13.8822	30.9842	14.0455	14.0271	31.2345
ENSG00000103145.6	HCFC1R1	protein_coding	chr16	3072621	3074287	-	2	10	1433	69.0208	69.0092	129.148	62.2076	61.9732	118.925	37.9097	38.0554	70.862	42.2138	42.3953	77.1191
ENSG00000103148.11	NPRL3	protein_coding	chr16	134273	188859	-	16	15	6605	10.419	9.62746	25.7808	10.6523	9.88482	28.09	14.5305	13.5458	38.4761	15.5321	14.4917	42.2962
ENSG00000103152.7	MPG	protein_coding	chr16	127006	135852	+	6	5	1661	25.7161	25.4599	36.1391	24.1619	24.0577	34.7733	42.3971	42.7831	62.4279	45.6553	46.3933	66.8878
ENSG00000103154.5	NECAB2	protein_coding	chr16	84002237	84036381	+	14	5	2520	24.0448	23.0326	43.602	20.8832	20.4903	37.1796	1.49886	1.16492	2.47754	1.29834	1.18384	1.72182
ENSG00000103160.7	HSDL1	protein_coding	chr16	84155886	84178797	-	8	7	3896	19.4259	19.4529	25.8353	19.7623	19.9995	25.4256	20.4633	20.4257	31.7777	20.4287	20.1944	29.3938
ENSG00000103168.12	TAF1C	protein_coding	chr16	84211458	84220669	-	10	24	5565	16.5227	16.5661	28.1421	15.1634	15.2389	27.1291	27.8688	27.7442	47.5703	30.8641	30.9107	58.3607
ENSG00000103174.7	NAGPA	protein_coding	chr16	5074845	5084142	-	9	17	5484	10.2886	9.7738	26.2658	9.06219	8.59014	22.4454	5.69029	5.53629	13.4202	6.06335	5.91018	15.4645
ENSG00000103175.6	WFDC1	protein_coding	chr16	84328252	84363450	+	6	3	4817	5.46204	5.50375	17.7256	5.08251	5.11982	16.2277	2.12081	2.08083	6.51351	2.38986	2.40905	7.68105
ENSG00000103187.6	COTL1	protein_coding	chr16	84599200	84651683	-	5	6	6742	15.446	15.8966	61.5536	15.3738	15.7983	60.9063	34.2384	35.3435	130.727	36.1702	37.3717	138.837
ENSG00000103194.11	USP10	protein_coding	chr16	84733584	84813528	+	18	19	5083	19.5445	19.6204	37.553	20.3915	20.528	37.7071	37.8626	38.0756	77.8287	36.9662	37.0798	70.8931
ENSG00000103197.12	TSC2	protein_coding	chr16	2097466	2138716	+	44	27	11116	23.7935	22.0223	82.1633	22.817	21.1423	84.1792	15.8835	15.3314	50.1927	16.2865	15.75	54.1059
ENSG00000103222.14	ABCC1	protein_coding	chr16	16043434	16236931	+	34	12	7575	3.84745	3.80739	4.72228	3.85424	3.81251	5.02201	33.6993	33.6914	39.2826	34.733	34.7138	41.5064
ENSG00000103226.13	NOMO3	protein_coding	chr16	16326352	16388668	+	38	18	8271	2.25628	2.30821	8.37948	2.2795	2.29322	7.28769	2.56225	2.57722	10.2947	2.22988	2.28029	7.69375
ENSG00000103241.5	FOXF1	protein_coding	chr16	86544133	86548076	+	2	1	2568	2.5928	2.52485	2.52485	2.08493	1.87433	1.87433	5.24172	5.16991	5.16991	5.09629	4.96187	4.96187
ENSG00000103245.9	NARFL	protein_coding	chr16	779753	791329	-	8	22	8101	7.79251	7.57389	30.5572	7.43675	7.27699	30.9137	5.73272	5.47807	22.748	5.77397	5.52077	23.3297
ENSG00000103248.13	MTHFSD	protein_coding	chr16	86563782	86588841	-	13	19	5350	2.91541	2.7201	7.41452	2.83551	2.7703	7.5809	5.34477	5.17567	15.3123	5.94341	5.7416	16.9047
ENSG00000103253.13	HAGHL	protein_coding	chr16	776936	785525	+	4	19	4890	8.20267	8.10783	32.8308	8.09951	7.93785	31.4659	7.48051	7.39322	30.5893	8.57419	8.3084	32.965
ENSG00000103254.5	FAM173A	protein_coding	chr16	770581	772601	+	2	8	1923	18.738	18.7318	43.6101	15.5513	15.5261	34.3293	9.67589	9.62704	22.3069	11.7965	11.4117	25.4665
ENSG00000103257.4	SLC7A5	protein_coding	chr16	87863629	87903094	-	11	3	4745	41.752	42.1677	48.0654	40.1197	40.7515	46.125	196.515	199.592	225.16	208.059	210.679	236.201
ENSG00000103260.4	METRN	protein_coding	chr16	765115	769655	+	4	6	3692	29.8784	29.4778	100.603	26.8347	26.5647	96.344	11.2536	11.2392	36.8476	12.9581	12.8053	44.5401
ENSG00000103266.6	STUB1	protein_coding	chr16	730224	732870	+	5	11	2316	87.9485	88.6843	179.388	81.1596	81.9685	168.042	54.1364	52.8937	110.256	60.3904	59.7662	126.056
ENSG00000103269.9	RHBDL1	protein_coding	chr16	725666	728268	+	6	4	1884	26.0718	23.8612	29.678	24.1803	21.7666	27.0644	5.04573	3.98668	4.84132	5.80165	4.41494	5.32783
ENSG00000103274.6	NUBP1	protein_coding	chr16	10837643	10863208	+	13	8	1955	9.30992	9.06518	14.7142	8.62564	8.38557	13.7664	24.7792	24.7559	41.4199	24.6696	24.6741	41.7461
ENSG00000103275.14	UBE2I	protein_coding	chr16	1355548	1377019	+	11	20	12368	12.3746	12.3449	72.9474	12.3746	12.3167	70.7539	21.7834	21.5565	177.338	21.5061	21.1057	170.189
ENSG00000103310.6	ZP2	protein_coding	chr16	21208773	21225831	-	18	6	3451	10.3479	9.19231	14.9118	10.9597	9.88065	15.9908	0.00734563	0.00766353	0.0213626	0	0	0
ENSG00000103316.6	CRYM	protein_coding	chr16	21250195	21314404	-	14	12	3782	50.4582	49.6664	149.792	49.3975	49.3575	149.128	0.68368	0.615368	1.88122	0.692083	0.601632	1.79569
ENSG00000103319.7	EEF2K	protein_coding	chr16	22217603	22298554	+	19	4	6357	13.4386	12.67	23.6342	13.5046	12.9318	26.3715	15.887	15.4637	26.0872	15.978	15.5024	26.7774
ENSG00000103355.8	PRSS33	protein_coding	chr16	2833954	2837949	-	6	4	2112	0	0	0	0.0216674	0.0225646	0.0621334	3.92489	3.80674	4.76278	4.65895	4.54883	5.55188
ENSG00000103356.11	EARS2	protein_coding	chr16	23533335	23569052	-	13	17	5730	9.73834	9.20751	19.7019	9.1603	8.50412	15.7165	17.8333	17.4282	35.6739	17.278	17.0223	34.4497
ENSG00000103363.10	TCEB2	protein_coding	chr16	2821415	2827298	-	4	5	1128	150.592	137.549	237.878	139.861	127.76	216.39	146.121	139.807	258.099	160.347	151.692	273.02
ENSG00000103365.11	GGA2	protein_coding	chr16	23474863	23533316	-	19	17	8231	18.1771	18.1091	40.4035	18.1328	18.0036	40.8719	32.578	32.3396	78.6683	31.1934	31.0442	75.8174
ENSG00000103381.7	CPPED1	protein_coding	chr16	12756919	12897874	-	4	4	3221	8.16132	8.24577	9.21152	8.40359	8.17452	9.4519	13.7098	13.6134	15.3427	12.9719	13.0295	14.7288
ENSG00000103415.7	HMOX2	protein_coding	chr16	4524691	4560348	+	11	15	3793	36.3292	37.1196	101.364	33.0091	33.9173	92.3816	15.131	15.3884	45.3127	15.5586	15.8437	45.6085
ENSG00000103423.9	DNAJA3	protein_coding	chr16	4475806	4506776	+	13	14	7071	15.7927	16.1385	45.5297	14.7782	14.9621	42.931	25.3067	25.6165	71.8664	25.3222	25.6931	74.2896
ENSG00000103449.7	SALL1	protein_coding	chr16	51169886	51185278	-	5	6	5660	8.82487	9.02014	16.9955	8.64699	8.85347	12.2154	9.7189	10.0134	18.1128	9.53157	9.79116	17.3979
ENSG00000103460.12	TOX3	protein_coding	chr16	52471917	52581714	-	11	5	5031	1.15402	1.19331	1.85695	0.914139	0.909364	1.47465	2.22711	2.22362	4.91138	2.16296	2.14577	3.36886
ENSG00000103489.7	XYLT1	protein_coding	chr16	17195626	17564738	-	15	4	11004	5.5169	5.64781	6.34522	5.24819	5.34856	5.95042	7.09766	7.22938	8.14486	7.06985	7.20043	8.32906
ENSG00000103490.13	PYCARD	protein_coding	chr16	31212806	31214771	-	2	4	1661	3.60636	3.49875	6.99068	3.43005	3.44296	6.37904	14.7429	15.0784	29.5752	16.021	16.3777	31.8753
ENSG00000103494.8	RPGRIP1L	protein_coding	chr16	53631595	53737850	-	32	11	12857	1.79195	1.81549	4.86053	1.85616	1.8385	4.78193	2.088	2.05083	6.80115	1.96985	1.9074	6.02775
ENSG00000103496.10	STX4	protein_coding	chr16	31044210	31054296	+	14	16	4078	14.1975	14.0092	46.5373	14.4478	14.2981	46.8171	16.4854	16.2066	49.937	17.4725	17.427	52.7627
ENSG00000103502.9	CDIPT	protein_coding	chr16	29869678	29875057	-	4	10	3325	60.3035	61.8156	125.023	57.4049	58.6281	116.222	34.2012	35.2678	72.293	37.538	38.6566	77.7385
ENSG00000103512.10	NOMO1	protein_coding	chr16	14927538	14990017	+	33	6	5819	25.6799	26.061	70.1716	24.7564	25.1795	70.9451	38.7195	39.0954	81.5903	37.5343	38.1075	80.6647
ENSG00000103522.11	IL21R	protein_coding	chr16	27413483	27462115	+	12	6	4219	0.196589	0.182141	0.252486	0.216931	0.225913	0.310705	3.78534	3.67962	5.45257	3.65345	3.58945	5.13611
ENSG00000103540.12	CCP110	protein_coding	chr16	19535133	19564730	+	14	11	10111	11.9924	11.9394	27.498	12.3082	12.0944	27.8913	7.56156	7.6037	17.0991	6.79779	6.80369	14.7849
ENSG00000103549.17	RNF40	protein_coding	chr16	30773066	30787628	+	18	13	6523	22.0184	22.2323	61.4921	20.941	21.1542	53.604	35.279	35.6949	90.1779	36.5226	36.7621	87.1555
ENSG00000103550.9	KNOP1	protein_coding	chr16	19714902	19729557	-	7	5	6115	4.97705	4.64574	18.2227	4.71834	4.49676	16.9902	15.0026	14.5231	49.8029	14.264	13.9164	46.6713
ENSG00000103591.8	AAGAB	protein_coding	chr15	67493371	67547533	-	15	7	3833	17.2628	17.2353	28.7089	18.2485	18.2395	31.1435	34.04	34.3816	60.0957	31.5829	31.8316	55.3718
ENSG00000103599.15	IQCH	protein_coding	chr15	67547138	67794598	+	27	14	7108	0.30144	0.273656	0.678328	0.315464	0.298355	1.11803	0.848796	0.773909	2.93699	0.94106	0.860752	3.12349
ENSG00000103642.7	LACTB	protein_coding	chr15	63413999	63434260	+	6	4	3017	3.48221	3.33507	5.38716	4.1105	4.08325	6.56357	8.61237	8.75718	13.3636	8.5311	8.48876	13.4958
ENSG00000103647.8	CORO2B	protein_coding	chr15	68871308	69020145	+	14	4	3998	89.7534	90.128	108.591	85.966	86.5217	104.383	9.38411	9.44625	11.3797	9.28086	9.40326	11.3157
ENSG00000103653.12	CSK	protein_coding	chr15	75074398	75095539	+	10	15	4572	13.9182	13.9662	32.8951	12.111	12.0809	28.416	34.3819	34.8576	79.9298	37.8749	38.4372	87.1924
ENSG00000103657.9	HERC1	protein_coding	chr15	63900817	64126141	-	82	15	17053	17.7903	17.8363	72.7309	17.6211	17.7765	68.1341	10.1604	10.2652	32.7363	9.65989	9.68846	33.1714
ENSG00000103671.5	TRIP4	protein_coding	chr15	64679947	64747502	+	17	12	3135	7.55477	7.26934	13.6755	7.17442	7.00784	11.8241	16.3176	16.0537	26.6174	13.3277	13.1853	21.7732
ENSG00000103707.5	MTFMT	protein_coding	chr15	65294845	65321977	-	9	7	2437	5.87086	5.39012	7.79115	6.01829	5.67105	8.35007	12.1184	11.8506	17.2099	10.5913	10.3638	14.864
ENSG00000103710.6	RASL12	protein_coding	chr15	65345679	65369028	-	6	3	2798	12.557	12.5821	13.6041	11.5794	11.6501	12.4469	1.53113	1.55014	1.71792	1.58511	1.53607	1.76743
ENSG00000103740.5	ACSBG1	protein_coding	chr15	78459810	78538030	-	22	15	8230	12.239	12.2522	39.9325	12.0214	12.1747	38.2573	0.409662	0.39847	0.76799	0.538898	0.516083	1.50939
ENSG00000103742.7	IGDCC4	protein_coding	chr15	65673802	65715410	-	21	6	7764	2.07423	2.00736	3.51892	2.35763	2.34169	3.44123	2.82426	2.72167	3.9116	2.56591	2.452	3.23525
ENSG00000103811.11	CTSH	protein_coding	chr15	79213400	79241916	-	14	17	5892	11.0738	10.9718	71.7204	10.3763	10.1751	64.6196	17.2397	17.2587	115.399	18.3989	18.3607	121.803
ENSG00000103855.13	CD276	protein_coding	chr15	73976307	74006859	+	15	19	5542	3.87034	3.79147	11.0945	4.00888	3.86961	10.3358	26.5253	26.8907	65.4955	27.6423	28.2061	67.6476
ENSG00000103888.11	KIAA1199	protein_coding	chr15	81071684	81244117	+	30	6	7621	5.47485	5.49227	6.24505	5.77348	5.84996	7.88898	9.44338	9.67509	10.7264	9.02518	9.24228	10.6833
ENSG00000103932.7	RPAP1	protein_coding	chr15	41809374	41836467	-	25	12	7046	6.69984	6.70732	13.3403	6.57262	6.51335	13.5177	13.38	13.3811	24.6128	14.3055	14.2197	25.0035
ENSG00000103942.8	HOMER2	protein_coding	chr15	83509838	83654661	-	13	10	10067	3.25664	3.17024	9.53294	3.59792	3.55044	11.4247	2.81021	2.81361	14.764	2.91782	2.85794	12.5234
ENSG00000103966.5	EHD4	protein_coding	chr15	42190950	42264776	-	6	2	5066	2.99244	2.92948	4.11899	2.73702	2.71395	3.81595	8.82188	8.93221	12.5663	9.67323	9.68159	13.6197
ENSG00000103978.11	TMEM87A	protein_coding	chr15	42502730	42565861	-	26	13	5588	13.445	13.3951	25.5711	14.2821	14.1528	29.4127	17.2794	17.0854	35.0485	15.9172	15.4641	34.0293
ENSG00000104043.10	ATP8B4	protein_coding	chr15	50150435	50475014	-	40	18	10861	0.377586	0.375877	1.38212	0.52878	0.445366	1.59252	0.947611	0.903396	2.21839	1.01977	0.986975	2.5592
ENSG00000104044.11	OCA2	protein_coding	chr15	28000021	28344504	-	25	5	3355	1.31848	1.19534	1.27058	1.28214	1.14347	1.21629	4.42771	4.28825	4.54558	4.18256	3.99387	4.29732
ENSG00000104047.10	DTWD1	protein_coding	chr15	49913177	49937333	+	11	13	3960	3.80494	3.56573	10.8925	4.29303	4.12179	12.8847	10.0631	9.55693	28.2967	8.70282	8.23578	28.1069
ENSG00000104081.9	BMF	protein_coding	chr15	40380091	40401093	-	7	11	5447	1.41694	1.45046	1.79973	1.16357	1.20738	1.48033	6.74815	6.8654	8.81657	6.62066	6.66975	8.55498
ENSG00000104112.4	SCG3	protein_coding	chr15	51973550	52013223	+	12	3	3310	108.896	109.979	114.12	114.293	115.865	120.814	4.48025	4.36253	5.21132	4.39318	4.34605	4.82536
ENSG00000104129.5	DNAJC17	protein_coding	chr15	41060067	41099675	-	13	11	2919	5.07507	4.09696	12.4185	4.89127	3.93463	11.6668	7.26016	6.59586	20.8677	6.32669	5.73369	16.9705
ENSG00000104133.10	SPG11	protein_coding	chr15	44854894	44955876	-	42	25	11853	5.72819	5.72951	20.1252	5.94363	5.82386	18.5838	9.45724	9.46491	28.1826	8.61223	8.55529	24.4327
ENSG00000104140.6	RHOV	protein_coding	chr15	41164412	41166487	-	3	1	1705	2.86469	2.87324	2.87324	3.00604	2.99075	2.99075	32.5904	33.0702	33.0702	35.6642	36.0916	36.0916
ENSG00000104142.6	VPS18	protein_coding	chr15	41186628	41196173	+	6	3	4049	14.2195	14.412	14.9818	14.1896	14.53	15.2492	12.3086	12.665	13.3992	12.875	13.1748	14.135
ENSG00000104147.4	OIP5	protein_coding	chr15	41601466	41624819	-	5	2	1236	0.466001	0.427436	0.427436	0.166608	0.173506	0.173506	20.3249	20.4557	20.673	19.8435	20.1274	20.2784
ENSG00000104177.13	MYEF2	protein_coding	chr15	48431625	48470714	-	18	14	9261	9.37137	9.14823	31.7031	10.2384	9.95478	35.5241	6.00829	5.66004	22.8762	5.91957	5.59637	21.2974
ENSG00000104213.8	PDGFRL	protein_coding	chr8	17433942	17501580	+	8	4	2409	1.0807	1.09653	1.81609	1.52918	1.49359	2.57168	2.76753	2.77752	4.45948	3.09863	3.17992	5.06865
ENSG00000104219.8	ZDHHC2	protein_coding	chr8	17013538	17082308	+	15	4	6735	9.57824	9.34893	18.013	11.7512	11.4418	20.1834	5.21298	5.06947	12.6834	4.38294	4.21178	12.4548
ENSG00000104221.8	BRF2	protein_coding	chr8	37700786	37707422	-	6	4	2760	9.59962	9.90147	10.4987	7.68496	7.88229	8.35771	9.57046	9.67802	10.3796	9.30792	9.54484	10.5655
ENSG00000104228.8	TRIM35	protein_coding	chr8	27142404	27168836	-	6	4	4269	8.29494	8.4491	8.60607	7.90563	7.94831	8.09519	8.88934	9.05103	9.17868	8.64061	8.81225	10.2154
ENSG00000104231.6	ZFAND1	protein_coding	chr8	82613569	82645138	-	9	25	4214	10.5354	10.3488	35.2469	12.0377	11.8349	37.1208	12.4523	12.4138	48.9335	11.9971	11.975	44.736
ENSG00000104267.5	CA2	protein_coding	chr8	86376081	86393722	+	8	5	2123	52.8825	54.0911	72.5835	56.9271	58.0608	76.1187	5.73146	5.87985	8.89898	6.02753	6.15674	8.88764
ENSG00000104299.10	INTS9	protein_coding	chr8	28625178	28747759	-	19	20	4905	3.39598	3.32917	7.69448	3.81113	3.81834	9.18357	8.47576	8.43819	18.2545	8.35032	8.23144	17.0437
ENSG00000104312.6	RIPK2	protein_coding	chr8	90769975	90803291	+	13	5	3117	3.60702	3.55165	5.6636	3.72904	3.78407	5.98407	11.6217	11.8447	19.071	11.663	11.8745	19.6306
ENSG00000104313.13	EYA1	protein_coding	chr8	72109668	72274467	-	18	11	5225	0.630544	0.64344	1.15686	0.849545	0.87104	1.29846	2.26571	2.24735	3.85115	2.20788	2.2161	3.61963
ENSG00000104320.9	NBN	protein_coding	chr8	90945564	91015456	-	20	10	6156	8.87357	8.59765	12.7552	9.13596	8.94911	13.105	17.1552	17.1801	25.0443	15.9682	15.8854	22.6237
ENSG00000104321.6	TRPA1	protein_coding	chr8	72932152	72987852	-	30	6	6377	0.0469669	0.0376574	0.0459776	0.0394682	0.0411024	0.0768999	3.31133	3.31363	5.02444	3.05559	3.06063	4.22416
ENSG00000104325.2	DECR1	protein_coding	chr8	91013633	91064320	+	17	19	3507	12.4491	12.4556	41.9098	13.3814	13.0046	43.5878	22.1259	22.0051	71.8868	22.1763	22.0739	70.8427
ENSG00000104327.3	CALB1	protein_coding	chr8	91070836	91107703	-	12	11	7138	24.1623	24.7105	79.2751	26.6729	27.2198	85.6165	0.209532	0.21119	0.787754	0.234276	0.233764	1.20175
ENSG00000104331.4	IMPAD1	protein_coding	chr8	57870492	57906403	-	7	3	7594	21.2916	21.7626	24.2225	22.227	22.7645	24.8096	23.8977	24.2981	28.9935	21.8421	22.2856	28.3751
ENSG00000104341.12	LAPTM4B	protein_coding	chr8	98787285	98865241	+	7	3	3197	28.9268	29.7679	35.3523	30.1522	30.961	33.5636	82.4561	85.0816	102.041	81.8798	84.5525	111.598
ENSG00000104356.6	POP1	protein_coding	chr8	99129525	99172062	+	17	4	4852	1.98482	1.85105	1.90322	1.82971	1.82198	1.87333	7.07934	7.06412	10.3066	7.35263	7.33134	8.99477
ENSG00000104365.9	IKBKB	protein_coding	chr8	42128820	42189973	+	19	30	10041	5.59629	5.35241	18.7989	5.64215	5.33233	17.4158	9.24013	9.08691	31.7309	8.98128	8.67658	30.297
ENSG00000104368.13	PLAT	protein_coding	chr8	42032236	42065242	-	16	13	7133	4.78353	4.9018	13.6456	4.895	5.01751	13.6142	13.0143	13.2661	37.3939	12.7617	12.9617	35.6001
ENSG00000104369.4	JPH1	protein_coding	chr8	75146935	75233563	-	6	3	4378	11.5985	10.8716	16.6026	12.6842	12.2624	15.9603	2.97619	2.79087	4.2667	2.85093	2.73146	3.94178
ENSG00000104388.10	RAB2A	protein_coding	chr8	61429416	61536186	+	11	12	5654	35.0313	35.2609	137.249	39.0438	39.4931	140.487	17.9251	18.0881	86.617	16.8801	16.9873	82.9206
ENSG00000104412.3	EMC2	protein_coding	chr8	109455830	109499145	+	14	7	3779	17.2717	17.1956	52.3771	17.262	17.0814	51.9171	13.6107	13.6048	42.4488	12.2622	12.283	38.3087
ENSG00000104419.10	NDRG1	protein_coding	chr8	134249414	134314265	-	25	30	9823	60.8895	62.0998	210.054	60.4525	61.619	209.65	68.5086	69.6212	243.977	71.1972	72.4227	255.8
ENSG00000104427.7	ZC2HC1A	protein_coding	chr8	79578282	79632000	+	10	4	4181	7.73664	7.36908	17.7994	9.46753	9.09586	22.0142	2.7587	2.68201	8.00568	2.63747	2.44898	6.8152
ENSG00000104435.9	STMN2	protein_coding	chr8	80523049	80578410	+	7	3	2362	521.911	532.804	615.027	520.262	532.331	615.352	0.214647	0.212739	0.226041	0.0718247	0.0749253	0.142661
ENSG00000104442.5	ARMC1	protein_coding	chr8	66514694	66546442	-	8	6	3408	15.3188	15.0581	21.5831	19.4164	19.1576	22.7857	16.6544	16.669	25.5534	15.8513	15.8457	25.2256
ENSG00000104447.7	TRPS1	protein_coding	chr8	116420724	116821899	-	15	11	11072	1.85819	1.89996	2.71338	2.01075	2.05096	4.40616	3.60373	3.68087	7.64336	3.34686	3.39543	6.02436
ENSG00000104472.5	CHRAC1	protein_coding	chr8	141521397	141527236	+	3	5	3301	3.6642	3.62285	7.88697	4.2074	4.10009	7.62301	20.3965	20.2698	46.6058	19.6029	19.5837	42.417
ENSG00000104497.9	SNX16	protein_coding	chr8	82711816	82755101	-	11	11	4610	2.64375	2.54727	6.5496	3.04746	3.05993	6.0665	3.10686	3.12084	9.46681	2.3342	2.23753	6.11768
ENSG00000104518.6	GSDMD	protein_coding	chr8	144635377	144645232	+	9	16	5116	2.97671	3.01819	8.57361	2.55821	2.61756	9.06619	11.1735	11.1453	30.6786	13.4206	13.5206	39.6693
ENSG00000104522.11	TSTA3	protein_coding	chr8	144694788	144700218	-	5	16	3622	10.5145	10.1705	31.0276	10.6381	10.276	29.8803	23.782	23.8474	72.061	27.0594	26.7338	78.7088
ENSG00000104524.9	PYCRL	protein_coding	chr8	144686083	144691943	-	8	7	3244	6.06516	6.10717	8.05976	5.57913	5.64854	7.40644	7.98627	7.97319	9.87008	9.13695	9.2742	12.2785
ENSG00000104529.13	EEF1D	protein_coding	chr8	144661867	144681711	-	15	55	9390	23.2697	22.8351	193.363	22.3691	21.9123	196.849	60.1456	58.583	558.596	64.2982	62.9787	616.666
ENSG00000104549.7	SQLE	protein_coding	chr8	126010739	126034525	+	12	6	4305	17.5857	17.5546	29.029	18.9849	19.2895	32.0407	50.8467	51.0692	82.438	49.7719	49.9825	78.5951
ENSG00000104611.7	SH2D4A	protein_coding	chr8	19171128	19253729	+	11	6	4148	0.510992	0.439989	0.615906	0.706061	0.723807	0.98298	10.0837	9.82512	15.7879	9.07963	9.06322	14.8617
ENSG00000104613.7	INTS10	protein_coding	chr8	19674651	19709594	+	19	19	6869	15.2375	14.1623	72.9794	14.8997	13.5636	72.2276	18.766	18.4808	62.1179	18.1353	17.6999	58.9535
ENSG00000104635.9	SLC39A14	protein_coding	chr8	22224762	22291642	+	16	12	6942	14.8085	15.0547	23.8174	14.9704	15.1372	24.0217	43.0676	43.3009	66.2718	41.4646	41.9107	65.4975
ENSG00000104643.5	MTMR9	protein_coding	chr8	11141925	11185646	+	12	4	8795	11.1201	11.1183	13.1322	11.4963	11.4603	13.5254	3.79598	3.71369	5.86567	3.77796	3.69383	6.20509
ENSG00000104679.6	R3HCC1	protein_coding	chr8	23127633	23153792	+	11	10	2630	22.2244	21.6675	36.7254	20.0185	19.5246	32.345	15.4894	14.953	24.4543	17.8128	17.6973	28.7982
ENSG00000104687.8	GSR	protein_coding	chr8	30535583	30585443	-	14	8	3232	20.4372	20.4848	23.9336	21.0118	21.0708	24.5594	44.5503	45.0137	57.3435	45.307	45.9408	57.1006
ENSG00000104689.5	TNFRSF10A	protein_coding	chr8	23047965	23082639	-	11	3	2951	0.624577	0.569633	0.619377	0.67456	0.670193	1.25179	6.91513	6.66773	7.24999	6.52089	6.39973	6.95858
ENSG00000104691.10	UBXN8	processed_transcript	chr8	30589764	30624522	+	12	12	2750	4.62457	4.00817	8.26316	5.36658	4.84362	10.7206	7.69711	6.74154	15.1903	8.09913	6.74798	15.5444
ENSG00000104695.8	PPP2CB	protein_coding	chr8	30631973	30671830	-	12	10	4516	65.0105	66.1664	195.676	70.8362	72.4343	200.414	23.8229	24.3093	67.9058	22.2232	22.6675	73.3728
ENSG00000104722.9	NEFM	protein_coding	chr8	24770525	24776607	+	4	6	4377	217.627	224.554	371.852	216.183	222.854	361.955	0.579158	0.604223	0.968275	0.764114	0.7971	1.50223
ENSG00000104725.9	NEFL	processed_transcript	chr8	24808468	24814624	-	4	1	4083	268.857	260.45	260.45	283.838	274.441	274.441	1.86258	1.82012	1.82012	1.58485	1.53562	1.53562
ENSG00000104728.11	ARHGEF10	protein_coding	chr8	1772142	1906807	+	33	16	10792	6.51977	6.48862	16.9828	6.11878	6.10277	16.0552	7.17836	7.11164	20.5351	7.25814	7.16618	20.0823
ENSG00000104738.12	MCM4	protein_coding	chr8	48872745	48890720	+	17	16	6824	9.37567	9.47685	23.9874	9.27771	9.31617	25.0702	71.4132	72.3917	214.115	68.7152	69.2993	189.804
ENSG00000104756.11	KCTD9	protein_coding	chr8	25285366	25315992	-	15	11	4380	6.73289	6.53535	9.21759	7.99782	7.85024	10.5505	18.1673	17.6131	26.8112	16.6109	16.4679	26.4965
ENSG00000104760.12	FGL1	protein_coding	chr8	17721889	17767874	-	12	11	3301	0.167506	0.138221	0.370977	0.388162	0.375361	1.09212	15.1515	12.4583	23.7685	14.4049	12.0091	22.9765
ENSG00000104763.13	ASAH1	protein_coding	chr8	17913934	17942494	-	16	14	5051	38.2191	37.9395	105.74	39.7005	39.5045	106.69	38.4236	38.5	112.97	36.4327	36.6991	108.756
ENSG00000104783.7	KCNN4	protein_coding	chr19	44270685	44285409	-	7	8	3289	0.67247	0.620614	1.56245	0.723503	0.717236	1.73077	8.11593	7.98471	13.9066	9.41722	9.23186	16.0307
ENSG00000104805.11	NUCB1	protein_coding	chr19	49403307	49426629	+	10	13	3937	65.8343	66.9797	125.006	65.1843	66.4308	127.979	87.6328	89.4101	179.191	95.1084	97.0114	194.523
ENSG00000104812.10	GYS1	protein_coding	chr19	49471382	49496567	-	16	10	4246	13.1148	13.2513	17.8347	13.3642	13.1824	18.0352	30.8066	31.1993	42.5539	32.9288	33.4512	43.9976
ENSG00000104814.8	MAP4K1	protein_coding	chr19	39078281	39109522	-	29	16	3953	0.944177	0.795813	1.8741	0.868231	0.819791	1.86408	5.69456	5.47938	10.0783	5.72019	5.27639	10.1535
ENSG00000104825.12	NFKBIB	protein_coding	chr19	39390340	39399533	+	6	6	2324	14.5828	14.766	18.6329	13.4292	13.6776	17.6051	15.3909	15.4197	21.8818	17.1756	17.3188	25.419
ENSG00000104833.6	TUBB4A	protein_coding	chr19	6494330	6502859	-	7	14	3466	754.972	760.865	1068.79	697.435	702.725	995.72	4.68817	4.83002	6.5599	4.3283	4.38385	6.52131
ENSG00000104852.10	SNRNP70	protein_coding	chr19	49588676	49611862	+	11	10	4684	137.782	138.942	267.013	128.785	129.661	248.575	86.6297	87.2509	208.548	93.7607	94.3646	226.007
ENSG00000104853.11	CLPTM1	protein_coding	chr19	45457842	45496599	+	16	12	5229	60.6753	62.0904	138.087	55.095	56.3282	127.013	33.1792	33.8868	79.2431	34.6642	35.3048	82.0563
ENSG00000104856.9	RELB	protein_coding	chr19	45504688	45541452	+	12	7	3031	1.86228	1.90148	3.00398	2.06085	2.06757	4.01903	6.61553	6.82331	10.8848	7.42823	7.45696	10.7474
ENSG00000104863.7	LIN7B	protein_coding	chr19	49617581	49621717	+	7	7	1753	13.9707	12.5619	32.7687	13.0132	11.6626	29.1093	4.46838	3.01733	8.03109	4.17523	3.14402	8.17776
ENSG00000104870.8	FCGRT	protein_coding	chr19	50010073	50029590	+	9	19	4173	8.8888	9.02328	25.3289	8.1862	8.24536	23.5231	14.5489	14.7476	39.7733	15.9887	16.3033	44.4444
ENSG00000104872.6	PIH1D1	protein_coding	chr19	49949555	49956754	-	9	24	3331	20.6805	19.1767	62.265	20.2156	19.1498	63.5681	28.5309	27.0264	88.9943	30.7039	28.8795	95.1829
ENSG00000104881.10	PPP1R13L	protein_coding	chr19	45882892	45909607	-	14	9	5032	1.88635	1.80869	6.50259	1.79609	1.76154	6.43306	7.72281	7.63133	20.329	10.1287	9.98817	29.4066
ENSG00000104883.3	PEX11G	protein_coding	chr19	7541761	7562335	-	9	4	1466	1.38297	1.31046	1.68408	1.65441	1.6904	2.26255	1.34876	1.20869	1.67513	1.47134	1.31066	1.79388
ENSG00000104884.10	ERCC2	protein_coding	chr19	45853095	45874176	-	20	14	6450	6.82243	6.70906	14.9617	6.82166	6.86399	15.7194	13.8657	13.6089	32.9349	14.3949	14.154	31.1473
ENSG00000104885.13	DOT1L	protein_coding	chr19	2164148	2232577	+	33	11	11431	6.28834	5.94943	10.1398	5.53454	5.31136	9.52461	18.1713	17.8194	35.0871	19.9339	19.3811	35.4806
ENSG00000104888.5	SLC17A7	protein_coding	chr19	49932658	49945617	-	13	6	6013	213.467	217.098	441.889	201.429	204.82	417.981	0.944345	0.910444	1.84351	0.777896	0.744204	1.54906
ENSG00000104889.4	RNASEH2A	protein_coding	chr19	12917394	12924452	+	5	4	2039	5.66091	5.75915	10.1834	4.35397	4.34727	7.55293	54.0439	54.6966	96.919	58.2061	58.7845	104.267
ENSG00000104894.7	CD37	protein_coding	chr19	49838428	49846592	+	8	15	4161	1.99883	2.04879	6.93376	1.56718	1.59771	5.01967	5.34289	5.30081	17.5317	5.37018	5.41973	18.0067
ENSG00000104897.5	SF3A2	protein_coding	chr19	2236520	2248678	+	8	8	3131	26.0119	25.6478	48.7373	22.8735	22.542	42.1512	63.1437	61.3489	121.427	69.5025	68.1587	128.606
ENSG00000104903.4	LYL1	protein_coding	chr19	13209847	13213975	-	3	3	3119	1.32222	1.22419	2.59431	1.67259	1.4821	3.14659	8.18442	8.11467	17.0633	8.73387	8.62455	18.2855
ENSG00000104904.8	OAZ1	protein_coding	chr19	2269485	2273487	+	2	13	3457	214.876	220.663	893.142	203.299	208.257	829.701	222.267	228.933	961.058	233.334	240.496	1003.1
ENSG00000104907.8	TRMT1	protein_coding	chr19	13215716	13228381	-	13	23	3364	18.7039	18.4103	31.7851	17.7523	17.0495	31.0839	36.721	35.8338	62.1278	40.2512	39.0728	67.5439
ENSG00000104915.10	STX10	protein_coding	chr19	13254872	13261197	-	5	11	1796	23.1161	23.145	36.6419	21.2756	21.6656	33.7618	38.3634	37.9474	60.6199	42.1291	42.0474	66.5894
ENSG00000104921.10	FCER2	protein_coding	chr19	7753644	7767032	-	10	7	2367	0.0876011	0.0913084	0.154597	0.0193331	0.0201337	0.034089	3.11651	2.98323	4.95901	3.47102	3.2577	5.47122
ENSG00000104953.14	TLE6	protein_coding	chr19	2977444	2995177	+	14	10	3647	0.322181	0.237046	0.565217	0.263502	0.261346	0.557658	1.5987	1.39957	4.55529	1.52179	1.49043	5.04566
ENSG00000104957.9	CCDC130	protein_coding	chr19	13842574	13874110	+	11	12	3307	16.4067	15.8303	35.6281	14.8964	14.5981	33.7733	14.9477	14.6269	37.0774	17.0244	16.6278	40.25
ENSG00000104964.10	AES	protein_coding	chr19	3052908	3063105	-	6	12	5298	214.488	211.218	764.963	203.72	199.319	714.803	57.8958	56.6676	213.99	63.3706	62.0977	235.486
ENSG00000104967.6	NOVA2	protein_coding	chr19	46436992	46476804	-	6	3	8684	15.5363	15.9117	18.9097	15.4479	15.6568	18.9943	0.43787	0.45682	0.611898	0.309784	0.3086	0.343443
ENSG00000104969.5	SGTA	protein_coding	chr19	2754712	2783369	-	15	5	3801	48.2724	48.6663	80.9611	43.9677	44.2084	72.6743	44.6239	45.2957	74.9553	47.9741	48.5418	81.1677
ENSG00000104973.10	MED25	protein_coding	chr19	50321539	50342073	+	17	8	6116	12.612	12.1602	35.871	12.5403	11.8518	33.9766	13.9432	13.271	39.8347	16.2628	15.4271	45.9772
ENSG00000104976.7	SNAPC2	protein_coding	chr19	7985201	7988135	+	6	6	2000	17.2678	17.4102	23.3712	14.4149	14.5233	19.9579	17.8462	18.2748	24.7215	19.5097	19.9601	27.6022
ENSG00000104980.3	TIMM44	protein_coding	chr19	7991603	8008805	-	12	12	4888	13.5039	12.518	44.0871	12.0208	11.5582	38.6869	20.9312	20.4087	72.1378	23.839	23.0423	78.6419
ENSG00000104998.2	IL27RA	protein_coding	chr19	14142560	14163743	+	14	1	2677	3.2704	3.2563	3.2563	2.82911	2.79494	2.79494	14.5356	14.5917	14.5917	16.5857	16.5272	16.5272
ENSG00000105011.4	ASF1B	protein_coding	chr19	14230321	14247768	-	4	5	2304	0.119995	0.125074	0.139956	0.248272	0.24821	0.490528	59.3035	61.2157	71.5292	61.0416	62.6452	73.747
ENSG00000105048.12	TNNT1	protein_coding	chr19	55644162	55660722	-	17	17	2171	2.47264	2.31181	8.54365	2.72967	2.40367	8.54603	27.8018	26.1058	63.6756	29.8062	28.3097	67.1419
ENSG00000105053.6	VRK3	protein_coding	chr19	50479724	50529203	-	20	27	9796	4.92956	4.38069	33.893	4.86999	4.29569	33.9644	6.52117	6.29854	40.3931	6.1183	5.96949	38.4311
ENSG00000105058.7	FAM32A	protein_coding	chr19	16296191	16302857	+	5	5	1921	50.1559	51.4035	69.5008	48.4772	49.765	67.1844	69.0685	70.8324	96.4233	68.4302	70.463	95.7328
ENSG00000105072.4	C19orf44	protein_coding	chr19	16607122	16632163	+	11	8	4421	2.91311	2.79196	4.11574	2.72748	2.49546	3.44317	3.48624	3.35596	5.72222	3.47008	3.414	4.73339
ENSG00000105088.4	OLFM2	protein_coding	chr19	9964394	10047228	-	8	5	2500	58.4824	59.4686	89.326	53.4586	54.5475	83.3862	6.71262	6.82329	9.74303	6.37884	6.46206	10.028
ENSG00000105122.8	RASAL3	protein_coding	chr19	15562435	15575382	-	16	7	4681	0.900695	0.8003	1.48463	0.894506	0.850097	1.87982	4.27821	4.02833	6.6471	5.33279	5.0499	8.09752
ENSG00000105127.4	AKAP8	protein_coding	chr19	15464196	15490609	-	16	5	4296	12.4581	12.3313	16.1076	13.3258	13.0179	17.6847	19.8856	19.2626	24.9137	19.2994	19.0733	24.2238
ENSG00000105135.11	ILVBL	protein_coding	chr19	15225795	15236596	-	10	14	5615	12.1371	12.0477	34.1319	11.6788	11.4282	34.1897	21.4943	21.2376	63.7194	23.4458	23.2288	69.6431
ENSG00000105137.8	SYDE1	protein_coding	chr19	15218214	15225799	+	6	5	3965	2.84139	2.89502	3.52154	3.09886	3.13703	3.79206	31.155	31.0559	37.1558	33.6794	33.4882	40.4896
ENSG00000105143.8	SLC1A6	protein_coding	chr19	15060846	15133802	-	14	11	7646	21.2071	21.6334	96.41	20.78	21.2852	94.2471	0.404482	0.418529	1.60359	0.377197	0.367028	1.57787
ENSG00000105146.8	AURKC	protein_coding	chr19	57742377	57746916	+	6	8	1741	2.22319	1.61381	2.1818	2.32619	1.98454	3.6632	4.76127	4.22299	6.13152	4.74691	4.29836	5.74013
ENSG00000105171.5	POP4	protein_coding	chr19	30094924	30108144	+	9	14	6574	6.24866	6.22088	48.2667	5.53051	5.50216	43.7567	7.26483	7.30567	68.0922	7.1262	7.0454	62.3113
ENSG00000105173.9	CCNE1	protein_coding	chr19	30302805	30315215	+	11	7	2568	2.62868	2.49679	3.66873	2.74427	2.57025	4.05258	12.1023	11.9361	18.4314	12.5709	12.2865	18.4651
ENSG00000105176.13	URI1	protein_coding	chr19	30414551	30506611	+	19	15	4528	16.9689	16.5362	36.3877	18.3531	17.6869	38.7201	26.1503	25.3079	59.8065	25.4668	24.5282	57.1383
ENSG00000105185.7	PDCD5	protein_coding	chr19	33071974	33078358	+	5	8	2253	30.0541	28.235	70.7097	29.9593	28.1538	72.0618	46.3564	44.8294	137.506	46.4598	44.5155	134.547
ENSG00000105193.4	RPS16	protein_coding	chr19	39923847	39926588	-	2	8	2603	120.072	120.79	552.725	107.389	107.533	490.012	442.593	446.183	2022.97	459.678	463.262	2106.52
ENSG00000105197.6	TIMM50	protein_coding	chr19	39971052	39984422	+	10	20	6908	11.9998	11.729	54.105	11.5364	11.3932	52.4526	19.3316	19.0771	92.5692	20.5484	20.3485	99.5485
ENSG00000105202.3	FBL	protein_coding	chr19	40325098	40337054	-	9	11	2173	27.6193	27.2631	70.7616	27.0189	26.2845	64.9892	147.852	146.9	377.584	152.764	152.483	384.823
ENSG00000105204.9	DYRK1B	protein_coding	chr19	40315990	40324841	-	12	8	3192	13.6344	13.8202	19.6592	12.2576	12.4441	16.6892	5.853	5.76661	8.04215	6.4993	6.43929	9.12318
ENSG00000105219.4	CNTD2	protein_coding	chr19	40728115	40732597	-	5	6	2039	4.94906	4.2752	5.27401	4.62329	4.0668	5.80384	0.783244	0.622584	0.901778	0.843911	0.681955	1.05808
ENSG00000105223.14	PLD3	protein_coding	chr19	40854363	40886346	+	14	25	5184	125.324	127.672	424.584	115.088	116.755	377.458	48.6506	49.6236	169.461	53.2307	54.2167	184.984
ENSG00000105227.10	PRX	protein_coding	chr19	40899675	40919273	-	7	3	5767	2.1533	2.17364	2.78934	2.31704	2.38406	3.14821	2.00882	2.02238	2.37844	2.06342	2.08235	2.46946
ENSG00000105229.2	PIAS4	protein_coding	chr19	4007644	4039384	+	13	6	3646	13.4532	13.3639	16.4707	13.298	13.3846	16.772	11.6111	11.7364	19.0728	12.3439	12.3081	19.6981
ENSG00000105245.5	NUMBL	protein_coding	chr19	41172596	41196877	-	14	11	5037	21.6806	21.7162	44.5796	19.76	19.6936	40.8766	8.27881	8.07004	17.0008	8.42019	8.38214	17.8774
ENSG00000105246.5	EBI3	protein_coding	chr19	4229495	4237528	+	5	2	1284	2.17113	2.01988	2.32083	1.58597	1.20626	1.30593	1.382	1.33882	1.44945	2.09514	2.04776	2.30475
ENSG00000105248.11	CCDC94	protein_coding	chr19	4247076	4269087	+	9	2	1671	18.9304	19.3004	22.4902	17.0065	17.1261	19.9565	18.4927	19.0082	22.1497	19.8701	20.3193	23.8064
ENSG00000105251.6	SHD	protein_coding	chr19	4278598	4290721	+	7	5	2811	9.40087	9.10674	18.0613	8.41648	8.36656	14.314	0.441885	0.385742	0.555966	0.750091	0.701526	1.68632
ENSG00000105254.7	TBCB	protein_coding	chr19	36605191	36616849	+	10	13	3326	65.8893	66.6561	260.659	60.848	61.6122	236.805	24.5952	24.6419	94.369	27.6823	27.912	106.281
ENSG00000105255.6	FSD1	protein_coding	chr19	4304597	4323840	+	12	10	3111	28.4823	28.1824	55.7578	25.9036	25.6051	47.5055	6.99135	6.84337	13.7069	6.51271	6.29813	12.0722
ENSG00000105258.4	POLR2I	protein_coding	chr19	36604612	36606248	-	4	7	1269	53.5219	53.9513	107.577	51.2068	52.0314	104.541	29.6846	30.4483	62.3495	33.4984	33.769	67.8801
ENSG00000105270.10	CLIP3	protein_coding	chr19	36505562	36524245	-	15	6	3772	284.66	292.467	330.156	274.6	281.927	317.125	7.21783	7.35492	8.23227	7.46604	7.60737	8.6868
ENSG00000105278.6	ZFR2	protein_coding	chr19	3804022	3869030	-	22	9	5944	5.33341	4.87231	14.3333	4.40755	3.94464	11.1979	0.985161	0.863171	3.53198	1.3129	1.09311	5.17575
ENSG00000105281.8	SLC1A5	protein_coding	chr19	47278140	47291851	-	9	6	3332	2.69665	2.61618	3.80158	3.04207	3.0107	4.1767	149.885	151.704	204.264	157.67	159.484	207.568
ENSG00000105289.10	TJP3	protein_coding	chr19	3708107	3750811	+	23	11	4259	0.0811426	0.0789382	0.186807	0.0752127	0.050353	0.0670821	3.2022	3.13587	6.16544	4.20526	4.14935	8.35662
ENSG00000105290.7	APLP1	protein_coding	chr19	36358801	36370693	+	20	11	3656	359.387	361.867	929.739	338.055	339.291	866.68	7.07242	7.07468	20.1074	7.50405	7.48223	15.3521
ENSG00000105298.9	CACTIN	protein_coding	chr19	3610639	3626813	-	10	10	5952	9.61511	9.60645	18.8862	8.9032	8.8515	19.5506	11.4057	11.3128	21.803	12.8589	12.7981	24.8088
ENSG00000105321.8	CCDC9	protein_coding	chr19	47759237	47775210	+	14	6	3407	8.2838	6.75948	12.3264	8.64325	7.23867	12.6762	11.5402	10.1689	19.9347	13.1955	11.7097	22.4152
ENSG00000105323.12	HNRNPUL1	protein_coding	chr19	41768401	41813503	+	21	20	6537	40.1043	40.7399	85.2933	39.6642	40.2786	83.7017	88.6563	90.1305	194.998	90.9627	92.5186	193.739
ENSG00000105325.9	FZR1	protein_coding	chr19	3506271	3538328	+	13	8	5802	21.3515	21.0755	33.8801	20.7552	20.3045	34.3475	12.972	12.4576	29.7819	14.1103	13.7129	31.7214
ENSG00000105327.11	BBC3	protein_coding	chr19	47724081	47736023	-	5	6	3178	4.51647	4.52626	8.89136	4.66543	4.62618	9.00933	7.62567	7.38149	15.433	9.30383	9.06108	18.8088
ENSG00000105329.5	TGFB1	protein_coding	chr19	41807492	41859816	-	8	4	3238	7.17215	7.1271	9.8436	6.15477	6.21093	7.70156	43.5675	44.1135	55.6612	49.0253	49.3692	60.2939
ENSG00000105339.6	DENND3	protein_coding	chr8	142127377	142205907	+	25	22	14670	5.15592	4.86994	22.5896	5.01131	4.7364	19.7986	4.01069	3.92647	18.3022	4.12354	3.95687	18.3383
ENSG00000105341.14	ATP5SL	protein_coding	chr19	41937223	41946622	-	5	16	4381	12.1007	12.3222	33.4236	11.6467	11.6775	31.8931	13.6962	14.0414	40.2576	16.1037	16.291	46.4348
ENSG00000105355.4	PLIN3	protein_coding	chr19	4838353	4867780	-	9	7	2813	19.5337	19.8823	24.1386	20.099	20.2959	24.8275	48.8431	49.2741	60.8857	54.1836	54.8509	68.4256
ENSG00000105357.11	MYH14	protein_coding	chr19	50691443	50813802	+	44	10	9933	12.8335	12.9608	20.677	11.8861	12.0448	19.453	7.09477	7.21278	11.0617	7.72234	7.8139	11.9951
ENSG00000105364.9	MRPL4	protein_coding	chr19	10362577	10370721	+	6	11	4070	16.7048	16.1431	50.0684	15.6174	15.2863	47.8512	27.5858	27.6035	85.2658	30.9705	30.8539	95.0928
ENSG00000105366.11	SIGLEC8	protein_coding	chr19	51954101	51961710	-	7	4	3171	1.80912	1.76452	2.06551	2.04924	1.96126	2.1089	0.0479655	0.0500414	0.0538085	0.191073	0.175403	0.227256
ENSG00000105371.8	ICAM4	protein_coding	chr19	10397643	10399198	+	2	3	1427	0.0322903	0.0168284	0.01983	0	0	0	4.74309	4.67036	5.41287	5.99524	6.07688	7.05697
ENSG00000105372.2	RPS19	protein_coding	chr19	42363988	42376994	+	8	8	3805	79.7619	81.648	573.415	75.4494	77.415	539.821	320.46	328.817	2428.17	351.606	360.478	2672.78
ENSG00000105374.5	NKG7	protein_coding	chr19	51874860	51875969	-	3	5	935	0.443533	0.385253	0.454463	0.758614	0.76454	0.859556	11.3057	11.5404	13.4333	12.0012	12.1948	14.0323
ENSG00000105376.4	ICAM5	protein_coding	chr19	10400657	10407454	+	11	5	3906	17.5241	17.2206	26.8621	17.0053	16.3857	24.7299	13.1097	12.2552	20.3013	14.8852	13.3788	25.1686
ENSG00000105383.10	CD33	protein_coding	chr19	51728320	51747115	+	7	7	5975	0.393303	0.397891	1.52566	0.356136	0.358918	1.52212	4.60751	4.43953	17.1127	4.4902	4.39207	16.2741
ENSG00000105397.9	TYK2	protein_coding	chr19	10461209	10491352	-	26	21	6687	16.9098	15.8478	73.0489	15.4831	14.6205	63.9753	27.0936	25.9525	101.685	28.8023	27.747	103.521
ENSG00000105398.3	SULT2A1	protein_coding	chr19	48373723	48389654	-	6	1	1987	0.0579746	0.0604281	0.0604281	0.0115152	0.011992	0.011992	17.0955	17.4626	17.4626	15.7465	16.0191	16.0191
ENSG00000105402.3	NAPA	protein_coding	chr19	47990894	48018497	-	12	22	5839	69.5119	70.8826	259.385	64.3044	65.1021	239	20.2833	20.4364	75.1871	22.4094	22.723	80.4801
ENSG00000105404.6	RABAC1	protein_coding	chr19	42460833	42463542	-	3	10	1999	52.0944	52.7734	130.708	45.2121	45.9875	113.57	21.4693	21.4591	53.7906	25.1692	25.2187	62.8592
ENSG00000105409.11	ATP1A3	protein_coding	chr19	42470734	42501649	-	24	9	5069	346.541	355.541	508.242	335.588	344.204	492.44	4.94593	5.08694	7.4009	5.03934	5.15215	7.1858
ENSG00000105419.13	MEIS3	protein_coding	chr19	47906381	47922780	-	13	14	5122	16.0176	15.2749	47.2478	14.411	13.7284	44.4956	7.3842	6.84148	22.2835	8.28519	7.78399	24.8497
ENSG00000105426.10	PTPRS	protein_coding	chr19	5158506	5340814	-	41	13	9460	31.0273	31.132	47.2531	29.3508	29.1278	44.9668	20.4728	20.3635	33.3884	22.3015	22.1952	35.4377
ENSG00000105429.8	MEGF8	protein_coding	chr19	42829761	42882921	+	42	7	11372	31.9897	32.0955	49.6577	30.3394	30.6108	48.1731	10.6397	10.549	16.5251	10.805	10.7379	15.2216
ENSG00000105438.4	KDELR1	protein_coding	chr19	48885827	48894810	-	6	5	2251	36.3447	36.4532	53.1663	39.3273	39.516	57.1021	129.936	129.837	188.416	135.703	134.788	196.258
ENSG00000105464.3	GRIN2D	protein_coding	chr19	48898132	48948188	+	13	1	5093	2.43826	2.37642	2.37642	2.30021	2.22702	2.22702	2.41403	2.34714	2.34714	2.95511	2.89901	2.89901
ENSG00000105472.8	CLEC11A	protein_coding	chr19	51226586	51228974	+	4	2	1468	10.2954	10.1913	10.5432	8.94657	9.08977	9.40365	13.6419	13.5297	14.0127	15.7994	15.8615	16.4469
ENSG00000105479.11	CCDC114	protein_coding	chr19	48799714	48825151	-	16	6	4299	0.535918	0.463636	0.741667	0.447077	0.293764	0.463277	0.731187	0.701312	1.10677	0.800528	0.711587	1.44016
ENSG00000105483.12	CARD8	protein_coding	chr19	48684027	48759203	-	23	32	12894	2.16918	2.11199	9.61898	2.21994	2.13629	10.4021	3.4936	3.32893	21.2452	3.53555	3.34896	20.4807
ENSG00000105486.9	LIG1	protein_coding	chr19	48618702	48673860	-	31	20	6572	5.0937	4.87079	14.0277	4.96121	4.65541	15.9878	24.37	23.7708	64.6243	25.6297	24.8818	66.9322
ENSG00000105497.3	ZNF175	protein_coding	chr19	52074551	52092991	+	5	5	4626	5.41364	5.46106	8.0293	5.5545	5.51149	7.92892	5.04146	4.97379	7.59301	4.51604	4.51424	7.99962
ENSG00000105509.6	HAS1	protein_coding	chr19	52216365	52227247	-	5	5	2241	2.95057	2.75396	2.95859	2.72609	2.73264	2.92085	0.49772	0.472055	0.50712	0.313626	0.29332	0.315108
ENSG00000105516.6	DBP	protein_coding	chr19	49133287	49140695	-	2	5	6544	14.5508	14.8547	69.0996	14.1501	14.4193	68.3	4.88866	5.07194	26.2496	5.67006	5.8337	32.7485
ENSG00000105520.6	DKFZP761J1410	protein_coding	chr19	11466062	11476374	+	8	8	3273	55.3839	56.0696	71.3425	49.998	50.4301	63.2038	22.2285	22.5925	30.4591	23.5619	23.8684	31.3315
ENSG00000105538.4	RASIP1	protein_coding	chr19	49223844	49243978	-	13	4	4149	4.14804	4.01103	6.85408	4.80336	4.67489	7.11601	10.7533	10.4666	18.003	11.3497	10.9074	19.8379
ENSG00000105552.10	BCAT2	protein_coding	chr19	49298319	49314286	-	12	12	4553	7.88379	7.04126	23.6056	8.25175	7.43682	22.4955	16.0573	15.939	48.9733	17.4169	17.3081	54.1109
ENSG00000105556.6	MIER2	protein_coding	chr19	305575	344798	-	16	4	3738	10.1081	9.91915	14.2099	9.57344	9.31963	12.9981	12.3968	12.0843	16.9584	13.7258	13.3849	19.2656
ENSG00000105559.7	PLEKHA4	protein_coding	chr19	49340354	49371889	-	21	11	3851	2.07597	2.10147	4.52665	1.83593	1.80676	4.50615	8.86024	8.72176	15.8774	9.84281	9.54555	17.3815
ENSG00000105568.13	PPP2R1A	protein_coding	chr19	52693292	52730687	+	16	12	5338	134.372	137.265	408.519	124.747	127.792	380.499	70.4123	72.0328	219.593	74.3915	76.1205	228.725
ENSG00000105605.3	CACNG7	protein_coding	chr19	54412589	54447195	+	6	4	2800	74.5973	73.6633	80.9781	71.3798	69.8932	74.8413	4.60823	4.25983	4.64361	4.25856	3.99996	4.47956
ENSG00000105610.4	KLF1	protein_coding	chr19	12995237	12997995	-	3	1	1592	0.289436	0.271516	0.271516	0.0718617	0.0748372	0.0748372	12.4201	12.2267	12.2267	12.2396	11.6564	11.6564
ENSG00000105612.4	DNASE2	protein_coding	chr19	12986025	12992282	-	5	5	2389	10.6757	10.5847	13.3404	10.5449	10.6224	15.0718	41.521	42.4987	57.1665	42.6179	43.029	57.8568
ENSG00000105613.5	MAST1	protein_coding	chr19	12944765	12985765	+	27	9	6533	44.2691	44.0657	84.7962	39.2682	38.8261	71.6296	3.1663	3.09282	11.661	3.32392	3.15008	11.5943
ENSG00000105617.3	LENG1	protein_coding	chr19	54658899	54663620	-	4	1	1542	7.51535	7.56865	7.56865	8.0424	8.03544	8.03544	8.21977	8.36969	8.36969	8.14144	8.14858	8.14858
ENSG00000105618.9	PRPF31	protein_coding	chr19	54618837	54635140	+	13	9	2616	27.4162	26.8415	40.2259	25.3298	24.9759	35.676	41.5035	41.1463	61.3701	43.7929	43.4702	64.3523
ENSG00000105619.9	TFPT	protein_coding	chr19	54610320	54619055	-	7	4	1240	32.8493	32.2641	39.9034	31.9408	31.9951	40.7945	18.9101	18.3422	22.2418	20.659	20.3683	24.4963
ENSG00000105639.14	JAK3	protein_coding	chr19	17935589	17958880	-	24	7	6813	3.86521	3.5741	4.65317	3.06622	2.86792	3.75105	3.4901	3.28402	4.53501	3.99126	3.92978	5.54749
ENSG00000105641.3	SLC5A5	protein_coding	chr19	17982782	18005983	+	14	2	3652	1.00938	0.986341	1.24838	1.09642	1.07657	1.31527	0.152709	0.159318	0.162704	0.0995442	0.0899959	0.0919086
ENSG00000105643.5	ARRDC2	protein_coding	chr19	18111941	18124911	+	5	9	4637	16.4757	16.6032	31.675	15.9726	16.228	31.3944	11.3218	11.3327	22.0932	11.3887	11.2425	22.1808
ENSG00000105649.5	RAB3A	protein_coding	chr19	18307594	18314884	-	5	4	1818	341.595	332.592	400.69	324.346	316.215	382.8	7.80851	7.78277	9.33386	8.57181	8.35778	10.3472
ENSG00000105650.17	PDE4C	protein_coding	chr19	18318771	18366229	-	22	17	8532	1.18544	1.19339	2.53203	0.941298	0.935588	2.07069	0.680391	0.700538	2.19738	0.610722	0.560043	1.72683
ENSG00000105655.14	ISYNA1	protein_coding	chr19	18545198	18549111	-	6	16	3284	9.09918	9.19176	18.5607	8.4932	8.46031	17.7285	42.2702	42.0701	89.8272	45.5932	45.837	94.6461
ENSG00000105662.11	CRTC1	protein_coding	chr19	18794487	18893004	+	16	4	6826	50.3917	49.7626	54.9848	48.004	47.3527	51.4798	6.45071	6.05573	11.0679	7.34243	6.9742	13.4744
ENSG00000105664.6	COMP	protein_coding	chr19	18893583	18902123	-	18	4	3100	1.8134	1.78169	2.81336	1.90427	1.67566	2.69171	0.40069	0.418031	0.526573	0.195449	0.195731	0.246553
ENSG00000105671.7	DDX49	protein_coding	chr19	19030484	19039436	+	11	14	2774	18.3881	18.3179	36.383	18.039	18.2791	34.4878	30.2114	29.7932	49.9198	33.9247	33.767	57.3652
ENSG00000105675.4	ATP4A	protein_coding	chr19	36040945	36054560	-	21	4	3889	2.02607	1.64869	3.22685	2.16511	1.80749	3.53295	0.0260733	0.0136009	0.0276641	0.0623186	0.0650088	0.132228
ENSG00000105676.9	ARMC6	protein_coding	chr19	19144384	19170563	+	13	20	3495	12.5446	12.6564	21.6807	12.3275	12.4152	19.6789	21.4258	21.4072	34.3429	23.7642	23.5965	38.3784
ENSG00000105677.7	TMEM147	protein_coding	chr19	36036497	36038428	+	1	9	1932	33.5808	34.368	72.3644	29.1813	29.6249	62.0147	53.4812	54.8512	117.619	60.1878	61.5167	130.944
ENSG00000105695.10	MAG	protein_coding	chr19	35783028	35804707	+	12	8	2957	168.933	172.435	215.076	159.121	162.373	203.328	0.540086	0.509797	1.02984	0.499959	0.461692	0.799873
ENSG00000105696.4	TMEM59L	protein_coding	chr19	18718240	18731849	+	8	5	2626	247.28	240.26	398.48	229.906	223.11	369.774	5.72445	5.54921	9.02469	6.10046	5.90168	9.77172
[truncated: 9,635 more rows]
